# Supplementary material for: Integrative omics analyses broaden treatment targets in human cancer
Source: Genome Med. 2018 Jul 27;10:60. doi: 10.1186/s13073-018-0564-z (PMC6064051; doi:10.1186/s13073-018-0564-z)
Supplement: Supplementary file 2 — Table S1. Drug classes in DEPO (database of evidence for precision oncology). Table S2. Sensitive druggable mutations in 6570 TCGA tumors. Table S3. Highest level of evidence present per variant for both resistant and sensitive. Table S4. Drugs represented in the GDSC Cell Line Data. Table S5. Cell lines that contain a sensitive mutation in DEPO. Table S6. Mann-Whitney U test of distribution of Ln(IC50) values in cell lines with DEPO sensitive mutations against background distribution for each drug. Table S7. Linear regression statistics for probe-drug pairs. Table S8. TCGA tumors (out of 3121) that are druggable based on two or more variant types (genomic, transcriptomic, proteomic). Table S9. Ten FDA-approved drug classes. Table S10. TCGA tumors that are druggable with one of ten classes of FDA-approved cancer drugs based on two or more variant types (genomic, transcriptomic, proteomic). Table S11. Druggability and demographics. Table S12. Cancer types responsible for the levels of evidence in the cancer type non-specific setting for Fig. 2a. Table S13. Novel druggable mutations clustering with known druggable mutations identified using HotSpot3D, a proximity-based clustering tool. Table S14. RNA-seq data and protein RPPA data for 6366 and 3877 TCGA tumors, respectively. Table S15. Druggable fusions in TCGA samples. Table S16. Evidence to support repurposing of proteogenomic alterations across cancer types. Table S17. Co-occurring druggable mutations. Table S18. Gene expression outlier scores and drug response for all cell lines. Table S19. TCGA tumors (out of 6570) that are druggable based on atleast one variant (genomic, transcriptomic, proteomic). (.xlsx 2.1 MB) (XLSX 2039 kb) [file 13073_2018_564_MOESM2_ESM.xlsx]

## Sheet: 1
Table S1. Drug classes in DEPO (database of evidence for precision oncology)
Drug Class	Drug
Bcr-Abl tyrosine kinase inhibitor	AZD0530	Dasatinib	Nilotinib	ponatinib	bosutinib	imatinib
Akt inhibitor	AKT inhibitors	AKTinhibit	A443654	ATP-competitive AKT inhibitors
BRAF inhibitor	BRAF inhibitors	dabrafenib	vemurafenib	PLX4720	SB590885
ALK inhibitor	ceritinib	crizotinib	alectinib	novel ALK inhibiors	PF2341066	TAE684
Jak kinase inhibitor	ruxolitinib	JAK inhibitor
anti-androgen	androgen receptor modulators and antagonists	bicalutamide	enzalutamide	ARN-509	flutamide	next-generation AR antagonists	PARP1Bical
angiogenesis inhibitor	sorafenib	ZD6474	pazopanib	sunitinib	VEGFR inhibitor	cabozantinib	regorafenib	AMG706	Axitinib	PDGFR inhibitor	vandetanib
ATM inhibitor	KU55933
Aurora kinase inhibitor	AURK inhibitors
Bcl-2 inhibitor	BCL2 inhibitors
EGFR inhibitor	cetuximab	panitumumab	EGFR TKI	anti-EGFR mAb	erlotinib	afatinib	gefitinib	lapatinib	BIBW2992	neratinib	EGFR monoclonal antibodies
EGFR tyrosine kinase inhibitor (3rd generation)	AZD9291	irreversible EGFR T790M inhibitor
HER2 inhibitor	lapatinib	afatinib	BIBW2992	ERBB2 TKIs	trastuzumab	neratinib	pertuzumab
mTOR inhibitor	mTOR inhibitor	everolimus	sirolimus	mTOR kinase inhibitors	AZD8055	rapamycin	Temsirolim	NVPBEZ235
MEK inhibitor	MEK inhibitor	trametinib	selumetinib	CI1040	RDEA119
PARP inhibitor	PARP inhibitor	AZD2281
BET inhibitor	BET inhibitor
BTK inhibitor	ibrutinib
PD-1/PD-L1 inhibitor	nivolumab	PD-L1 inhibitor	PDL1 inhibitors
CDK inhibitor	CDK4/6 inhibitors	CDK2 inhibitors	CDK4 inhibitor	flavopiridol	CDK6 inhibitor	LY2835219	Palbociclib	CDK7 inhibitor
CD30 antibody-drug conjugate	Brentuximab Vedotin
anti-estrogen	letrozole	aromatase inhibitor	anti-estrogen	novel estrogen receptor degrader	SERM	SERD
Wnt inhibitor	FH535
DLL3 antibody-drug conjugate	DLL3 antibody-drug conjugate
EphA3 inhibitor	EphA3 inhibitor
EZH2 inhibitor	EZH2 inhibitor
FGFR inhibitor	dovitinib	TKI258	FGFR inhibitor	pazopanib	PD173074
Proteasome inhibitor	bortezomib
FLT3 inhibitor	CEP701	lestaurtinib	FLT3 inhibitor	quizartinib	Tandutinib	midostaurin	crenolanib
HDAC inhibitor	MS275	Vorinostat
Hsp90 inhibitor	AUY922	17AAG
IDH inhibitor	IDH1 inhibitor	IDH2 inhibitor
IGF-1R inhibitor	AEW541	OSI906	IGF1R inhibitor
CD25 antibody-drug conjugate	denileukin diftitox
KIT inhibitor	dasatinib	imatinib	KIT inhibitor	nilotinib	ponatinib	SCF	AMG706	Axitinib
ERK inhibitor	ERK inhibitor
PI3K inhibitor	PI3K pathway inhibitor	NVPBEZ235
MAPK inhibitor	BIRB0796	VX702
MDM2 inhibitor	MDM2 inhibitors (tumors TP53 wt)	MDM2/MDMX inhibitors	Nutlin3
c-Met inhibitor	MET inhibitor	MET TKIs	crizotinib	PF2341066	PHA665752
Topoisomerase inhibitor	daunorubicin	irinotecan	anthracycline
CD20 inhibitor	anti-CD20
Pim-1 inhibitor	PIM inhibitors
FAK inhibitor	FAK inhibitor
Gamma secretase inhibitor	Gamma secretase inhibitors
Trk inhibitor	TRK inhibitors	pan-TRK inhibitor
Plk-1 inhibitor	BI2536
retinoid	ATRA
macrolide	Bryostatin
DNA-PK inhibitor	NU7441	DNA-PKc inhibitor
SMO inhibitor	vismodegib
Shp-1 inhibitor	NSC87877
RET inhibitor	vandetanib	RET inhibitor
spliceosome inhibitor	spliceosome inhibitor
Syk inhibitor	SYK inhibitors
tubulin inhibitor	anti-tubulin agents
steroid	steroids
PAK inhibitor	PAK inhibitors
anti-metabolite	gemcitabine
EGFR inhibitor (1st,2nd, and 3rd generation)	first-generation and irreversible EGFR TKIs
LRRK2 kinase inhibitor	TAE684
Topoisomerase inhibitor + CHK1/2 inhibitor	irinotecan plus CHK1/2 inhibitor in ATM deficient tumor
Antineoplastic	cisplatin	temozolomide	liposomal doxorubicin	docetaxel	aresenic trioxide
Antidiabetic Drug	phenformin
Not Otherwise Specified	JNK9L	CMK	SL01011

## Sheet: 2
Table S2. Sensitive druggable mutations in 6,570 TCGA tumors
Gene	Variant	Effect	Sensitive level	Sensitive Drug	Resistant Level	Resistant Drug	Mutation Type	Tumor ID	Tumor Type
KRAS	p.G12D	Both	Clinical Trials	MEK inhibitors	FDA Approved	panitumumab	missense	TCGA-AH-6644-01A-21D-1826-10	COADREAD
KRAS	p.G12D	Both	Clinical Trials	MEK inhibitors	FDA Approved	panitumumab	missense	TCGA-06-2561-01A-02D-1494-08	GBM
IDH1	p.R132H	Sensitive	Case Reports	IDH1 inhibitor	NA	NA	missense	TCGA-P5-A5F0-01A-11D-A289-08	LGG
IDH1	p.R132H	Sensitive	Case Reports	IDH1 inhibitor	NA	NA	missense	TCGA-DB-A4XA-01A-11D-A26M-08	LGG
GNAS	p.R201C	Sensitive	Case Reports	JAK inhibitors	NA	NA	missense	TCGA-55-8089-01A-11D-2238-08	LUAD
PIK3CA	p.E545K	Sensitive	Case Reports	mTOR inhibitors	NA	NA	missense	TCGA-AC-A3W7-01A-11D-A228-09	BRCA
IDH1	p.R132H	Sensitive	Case Reports	IDH1 inhibitor	NA	NA	missense	TCGA-CS-6665-01A-11D-1893-08	LGG
BRAF	p.V600E	Both	FDA Approved	vemurafenib, dabrafenib, trametinib, dabrafenib + trametinib	Clinical Trials	cetuximab, panitumumab	missense	TCGA-ET-A39J-01A-11D-A19J-08	THCA
FGFR2	p.N550K	Both	Case Reports	ponatinib	Preclinical	Dovitinib	missense	TCGA-BG-A0LX-01A-11W-A062-09	UCEC
FGFR2	p.N549K	Sensitive	Case Reports	FGFR inhibitors	NA	NA	missense	TCGA-BG-A0LX-01A-11W-A062-09	UCEC
PIK3CA	p.H1047R	Sensitive	Clinical Trials	PI3K/AKT/mTOR inhibitors	NA	NA	missense	TCGA-A8-A08L-01A-11W-A019-09	BRCA
NRAS	p.Q61K	Both	Clinical Trials	MEK inhibitors	FDA Approved	cetuximab, panitumumab	missense	TCGA-CM-5864-01A-01D-1650-10	COADREAD
KIT	p.S821Y	Both	Preclinical	sorafenib	Clinical Trials	imatinib	missense	TCGA-B5-A0JY-01A-11D-A10B-09	UCEC
PIK3CA	p.H1047R	Sensitive	Clinical Trials	PI3K/AKT/mTOR inhibitors	NA	NA	missense	TCGA-AR-A24T-01A-11D-A167-09	BRCA
EGFR	p.R108K	Sensitive	Case Reports	erlotinib	NA	NA	missense	TCGA-27-1831-01A-01D-1494-08	GBM
EGFR	p.A289V	Sensitive	Case Reports	erlotinib	NA	NA	missense	TCGA-27-1831-01A-01D-1494-08	GBM
MTOR	p.I1973F	Sensitive	Preclinical	everolimus	NA	NA	missense	TCGA-B0-5100-01A-01D-1421-08	KIRC
BRAF	p.V600E	Both	FDA Approved	vemurafenib, dabrafenib, trametinib, dabrafenib + trametinib	Clinical Trials	cetuximab, panitumumab	missense	TCGA-D9-A6E9-06A-12D-A30X-08	SKCM
BRAF	p.V600E	Both	FDA Approved	vemurafenib, dabrafenib, trametinib, dabrafenib + trametinib	Clinical Trials	cetuximab, panitumumab	missense	TCGA-DJ-A3VE-01A-11D-A23M-08	THCA
KRAS	p.G12C	Both	Clinical Trials	MEK inhibitors	FDA Approved	panitumumab	missense	TCGA-78-7539-01A-11D-2063-08	LUAD
BRAF	p.V600E	Both	FDA Approved	vemurafenib, dabrafenib, trametinib, dabrafenib + trametinib	Clinical Trials	cetuximab, panitumumab	missense	TCGA-DJ-A1QQ-01A-11D-A14W-08	THCA
BRAF	p.V600E	Both	FDA Approved	vemurafenib, dabrafenib, trametinib, dabrafenib + trametinib	Clinical Trials	cetuximab, panitumumab	missense	TCGA-EE-A2MK-06A-11D-A196-08	SKCM
CTNNB1	p.S37C	Sensitive	Clinical Trials	everolimus + letrozole	NA	NA	missense	TCGA-67-3771	LUAD
EGFR	p.L858R	Sensitive	FDA Approved	erlotinib, afatinib	NA	NA	missense	TCGA-67-3770	LUAD
KRAS	p.G12C	Both	Clinical Trials	MEK inhibitors	FDA Approved	panitumumab	missense	TCGA-67-3774	LUAD
KRAS	p.G12V	Both	Clinical Trials	MEK inhibitors	FDA Approved	panitumumab	missense	TCGA-67-3774	LUAD
BRAF	p.V600E	Both	FDA Approved	vemurafenib, dabrafenib, trametinib, dabrafenib + trametinib	Clinical Trials	cetuximab, panitumumab	missense	TCGA-GF-A6C8-06A-12D-A30X-08	SKCM
BRAF	p.G466V	Sensitive	Case Reports	dasatinib	NA	NA	missense	TCGA-78-8662-01A-11D-2393-08	LUAD
NOTCH2	p.G2174R	Sensitive	Case Reports	Gamma secretase inhibitors	NA	NA	missense	TCGA-78-8662-01A-11D-2393-08	LUAD
PIK3CA	p.H1047R	Sensitive	Clinical Trials	PI3K/AKT/mTOR inhibitors	NA	NA	missense	TCGA-OR-A5LK-01A-11D-A29I-10	ACC
AKT1	p.E17K	Sensitive	Clinical Trials	AKT inhibitors	NA	NA	missense	TCGA-AR-A24X-01A-11D-A167-09	BRCA
BRAF	p.V600E	Both	FDA Approved	vemurafenib, dabrafenib, trametinib, dabrafenib + trametinib	Clinical Trials	cetuximab, panitumumab	missense	TCGA-KS-A4I9-01A-11D-A257-08	THCA
IDH1	p.R132H	Sensitive	Case Reports	IDH1 inhibitor	NA	NA	missense	TCGA-06-6389-01A-11D-1696-08	GBM
PIK3CA	p.E545K	Sensitive	Case Reports	mTOR inhibitors	NA	NA	missense	TCGA-JW-A5VJ-01A-11D-A28B-09	CESC
KRAS	p.G12V	Both	Clinical Trials	MEK inhibitors	FDA Approved	panitumumab	missense	TCGA-NF-A4WU-01A-11D-A28R-08	UCS
PIK3CA	p.E542K	Sensitive	Case Reports	mTOR inhibitors	NA	NA	missense	TCGA-TN-A7HL-01A-11D-A34J-08	HNSC
EGFR	p.ELREA746in_frame_del	Sensitive	FDA Approved	erlotinib, afatinib	NA	NA	in_frame_del	TCGA-44-2661-01A-01D-1105-08	LUAD
BRAF	p.G469A	Both	Case Reports	EGFR TKIs + MEK inhibitors in EGFR mutant	Case Reports	EGFR TKIs	missense	TCGA-55-7913-01B-11D-2238-08	LUAD
BRCA2	p.T2515fs	Sensitive	FDA Approved	PARP inhibitors	NA	NA	frame_shift_del_unspecified	TCGA-BR-8361-01A-11D-2340-08	STAD
KRAS	p.G13D	Both	Clinical Trials	cetuximab	FDA Approved	panitumumab	missense	TCGA-BR-4257-01A-01D-1126-08	STAD
PIK3CA	p.H1047R	Sensitive	Clinical Trials	PI3K/AKT/mTOR inhibitors	NA	NA	missense	TCGA-A2-A0EN-01A-13D-A099-09	BRCA
KRAS	p.A146T	Both	Case Reports	MEK inhibitors + PI3K pathway inhibitors	Clinical Trials	cetuximab, panitumumab	missense	TCGA-A6-6141-01A-11D-1771-10	COADREAD
MTOR	p.S2215Y	Sensitive	Case Reports	rapamycin	NA	NA	missense	TCGA-A6-6141-01A-11D-1771-10	COADREAD
GNAS	p.R201H	Sensitive	Case Reports	JAK inhibitors	NA	NA	missense	TCGA-A6-6141-01A-11D-1771-10	COADREAD
EGFR	p.L858R	Sensitive	FDA Approved	erlotinib, afatinib	NA	NA	missense	TCGA-MP-A4SW-01A-21D-A24P-08	LUAD
FLT3	p.D835Y	Both	Preclinical	lestaurtinib	Case Reports	sorafenib	missense	TCGA-AB-2924-03A-01W-0745-08	LAML
PIK3CA	p.H1047R	Sensitive	Clinical Trials	PI3K/AKT/mTOR inhibitors	NA	NA	missense	TCGA-A2-A1FZ-01A-51D-A17G-09	BRCA
BRAF	p.V600E	Both	FDA Approved	vemurafenib, dabrafenib, trametinib, dabrafenib + trametinib	Clinical Trials	cetuximab, panitumumab	missense	TCGA-ET-A3DU-01A-11D-A19J-08	THCA
ERBB2	p.D769Y	Sensitive	Case Reports	trastuzumab, lapatinib, neratinib	NA	NA	missense	TCGA-HU-A4H0-01A-11D-A25D-08	STAD
FGFR2	p.K660E	Both	Case Reports	ponatinib	Preclinical	dovitinib	missense	TCGA-B5-A0JR-01A-13W-A062-09	UCEC
BRCA2	p.482fs	Sensitive	FDA Approved	PARP inhibitors	NA	NA	frame_shift_del_unspecified	TCGA-DD-A1EG-01A-11D-A20W-10	LIHC
KRAS	p.G12C	Both	Clinical Trials	MEK inhibitors	FDA Approved	panitumumab	missense	TCGA-CM-4747-01A-01D-1408-10	COADREAD
KRAS	p.G12C	Both	Clinical Trials	MEK inhibitors	FDA Approved	panitumumab	missense	TCGA-N5-A4RS-01A-11D-A28R-08	UCS
KRAS	p.Q61H	Both	Clinical Trials	MEK inhibitors	FDA Approved	panitumumab	missense	TCGA-69-7974-01A-11D-2184-08	LUAD
ERBB2	p.774in_frame_insAYVM	Sensitive	Clinical Trials	trastuzumab	NA	NA	in_frame_ins	TCGA-44-A47B-01A-11D-A24D-08	LUAD
EGFR	p.A289V	Sensitive	Case Reports	erlotinib	NA	NA	missense	TCGA-DU-A5TT-01A-11D-A289-08	LGG
CTNNB1	p.S37C	Sensitive	Clinical Trials	everolimus + letrozole	NA	NA	missense	TCGA-B5-A0K0-01A-11W-A062-09	UCEC
PIK3CA	p.H1047R	Sensitive	Clinical Trials	PI3K/AKT/mTOR inhibitors	NA	NA	missense	TCGA-E2-A1IF-01A-11D-A142-09	BRCA
KRAS	p.G12D	Both	Clinical Trials	MEK inhibitors	FDA Approved	panitumumab	missense	TCGA-E2-A1IF-01A-11D-A142-09	BRCA
KRAS	p.G12D	Both	Clinical Trials	MEK inhibitors	FDA Approved	panitumumab	missense	TCGA-DM-A28K-01A-21D-A16V-10	COADREAD
AKT1	p.E17K	Sensitive	Clinical Trials	AKT inhibitors	NA	NA	missense	TCGA-GM-A2DL-01A-11D-A18P-09	BRCA
IDH1	p.R132H	Sensitive	Case Reports	IDH1 inhibitor	NA	NA	missense	TCGA-DB-A64R-01A-11D-A29Q-08	LGG
KRAS	p.G12V	Both	Clinical Trials	MEK inhibitors	FDA Approved	panitumumab	missense	TCGA-25-1316	OV
PIK3CA	p.E545K	Sensitive	Case Reports	mTOR inhibitors	NA	NA	missense	TCGA-E5-A2PC-01A-11D-A202-08	BLCA
PIK3CA	p.E542K	Sensitive	Case Reports	mTOR inhibitors	NA	NA	missense	TCGA-FD-A3SN-01A-12D-A22Z-08	BLCA
EGFR	p.LRE747in_frame_del	Sensitive	FDA Approved	erlotinib, afatinib	NA	NA	in_frame_del	TCGA-MP-A4T6-01A-32D-A25L-08	LUAD
BRAF	p.V600E	Both	FDA Approved	vemurafenib, dabrafenib, trametinib, dabrafenib + trametinib	Clinical Trials	cetuximab, panitumumab	missense	TCGA-BJ-A290-01A-11D-A17V-08	THCA
PIK3CA	p.H1047R	Sensitive	Clinical Trials	PI3K/AKT/mTOR inhibitors	NA	NA	missense	TCGA-C8-A3M7-01A-12D-A21Q-09	BRCA
KRAS	p.G12D	Both	Clinical Trials	MEK inhibitors	FDA Approved	panitumumab	missense	TCGA-A5-A0GP-01A-11W-A062-09	UCEC
KRAS	p.G13D	Both	Clinical Trials	cetuximab	FDA Approved	panitumumab	missense	TCGA-G4-6323-01A-11D-1719-10	COADREAD
PIK3CA	p.H1047R	Sensitive	Clinical Trials	PI3K/AKT/mTOR inhibitors	NA	NA	missense	TCGA-CQ-5331-01A-02D-1870-08	HNSC
IDH1	p.R132H	Sensitive	Case Reports	IDH1 inhibitor	NA	NA	missense	TCGA-DB-5277-01A-01D-1468-08	LGG
BRAF	p.V600E	Both	FDA Approved	vemurafenib, dabrafenib, trametinib, dabrafenib + trametinib	Clinical Trials	cetuximab, panitumumab	missense	TCGA-EE-A2GH-06A-11D-A196-08	SKCM
PIK3CA	p.E545K	Sensitive	Case Reports	mTOR inhibitors	NA	NA	missense	TCGA-GV-A3JX-01A-11D-A20D-08	BLCA
PIK3CA	p.H1047R	Sensitive	Clinical Trials	PI3K/AKT/mTOR inhibitors	NA	NA	missense	TCGA-A1-A0SI-01A-11D-A142-09	BRCA
IDH1	p.R132H	Sensitive	Case Reports	IDH1 inhibitor	NA	NA	missense	TCGA-HT-A61B-01A-11D-A29Q-08	LGG
KRAS	p.G12D	Both	Clinical Trials	MEK inhibitors	FDA Approved	panitumumab	missense	TCGA-44-A47A-01A-21D-A24D-08	LUAD
NOTCH1	p.S2523L	Sensitive	Clinical Trials	steroids early setting	NA	NA	missense	TCGA-AR-A2LR-01A-12D-A18P-09	BRCA
PIK3CA	p.E545K	Sensitive	Case Reports	mTOR inhibitors	NA	NA	missense	TCGA-DG-A2KK-01A-11D-A17W-09	CESC
KRAS	p.G13D	Both	Clinical Trials	cetuximab	FDA Approved	panitumumab	missense	TCGA-DG-A2KK-01A-11D-A17W-09	CESC
CTNNB1	p.D32V	Sensitive	Clinical Trials	everolimus + letrozole	NA	NA	missense	TCGA-EJ-5494-01A-01D-1576-08	PRAD
BRAF	p.V600E	Both	FDA Approved	vemurafenib, dabrafenib, trametinib, dabrafenib + trametinib	Clinical Trials	cetuximab, panitumumab	missense	TCGA-EL-A3GV-01A-11D-A21A-08	THCA
AKT1	p.E17K	Sensitive	Clinical Trials	AKT inhibitors	NA	NA	missense	TCGA-B6-A0WZ-01A-11D-A10G-09	BRCA
NRAS	p.Q61R	Both	Clinical Trials	MEK inhibitors	FDA Approved	cetuximab, panitumumab	missense	TCGA-EE-A3J8-06A-11D-A20D-08	SKCM
KRAS	p.G12C	Both	Clinical Trials	MEK inhibitors	FDA Approved	panitumumab	missense	TCGA-MP-A4TI-01A-21D-A24P-08	LUAD
PIK3CA	p.H1047R	Sensitive	Clinical Trials	PI3K/AKT/mTOR inhibitors	NA	NA	missense	TCGA-AQ-A1H2-01A-11D-A13L-09	BRCA
BRCA1	p.E116*	Sensitive	FDA Approved	PARP inhibitors	NA	NA	nonsense	TCGA-25-1625	OV
PIK3CA	p.H1047R	Sensitive	Clinical Trials	PI3K/AKT/mTOR inhibitors	NA	NA	missense	TCGA-A8-A07Z-01A-11W-A019-09	BRCA
BRAF	p.V600E	Both	FDA Approved	vemurafenib, dabrafenib, trametinib, dabrafenib + trametinib	Clinical Trials	cetuximab, panitumumab	missense	TCGA-ET-A3DW-01A-11D-A19J-08	THCA
KRAS	p.G12C	Both	Clinical Trials	MEK inhibitors	FDA Approved	panitumumab	missense	TCGA-EK-A2R8-01A-21D-A18J-09	CESC
PIK3CA	p.H1047R	Sensitive	Clinical Trials	PI3K/AKT/mTOR inhibitors	NA	NA	missense	TCGA-FI-A2D2-01A-11D-A17D-09	UCEC
KRAS	p.G12A	Both	Clinical Trials	MEK inhibitors	FDA Approved	panitumumab	missense	TCGA-80-5608-01A-31D-1945-08	LUAD
BRAF	p.V600E	Both	FDA Approved	vemurafenib, dabrafenib, trametinib, dabrafenib + trametinib	Clinical Trials	cetuximab, panitumumab	missense	TCGA-EE-A2MH-06A-11D-A197-08	SKCM
BRAF	p.V600E	Both	FDA Approved	vemurafenib, dabrafenib, trametinib, dabrafenib + trametinib	Clinical Trials	cetuximab, panitumumab	missense	TCGA-DJ-A1QM-01A-11D-A14W-08	THCA
BRAF	p.V600E	Both	FDA Approved	vemurafenib, dabrafenib, trametinib, dabrafenib + trametinib	Clinical Trials	cetuximab, panitumumab	missense	TCGA-D9-A148-06A-11D-A19A-08	SKCM
KIT	p.I83M	Both	Clinical Trials	ponatinib	Clinical Trials	imatinib	missense	TCGA-CN-A497-01A-11D-A24D-08	HNSC
BRAF	p.V600E	Both	FDA Approved	vemurafenib, dabrafenib, trametinib, dabrafenib + trametinib	Clinical Trials	cetuximab, panitumumab	missense	TCGA-AA-A00J-01A-02W-A005-10	COADREAD
KRAS	p.G12C	Both	Clinical Trials	MEK inhibitors	FDA Approved	panitumumab	missense	TCGA-55-7281-01A-11D-2036-08	LUAD
PIK3CA	p.E545K	Sensitive	Case Reports	mTOR inhibitors	NA	NA	missense	TCGA-IQ-A61E-01A-22D-A30E-08	HNSC
HRAS	p.G12S	Sensitive	Case Reports	mTOR inhibitors	NA	NA	missense	TCGA-IQ-A61E-01A-22D-A30E-08	HNSC
IDH1	p.R132H	Sensitive	Case Reports	IDH1 inhibitor	NA	NA	missense	TCGA-HT-A5R7-01A-11D-A289-08	LGG
PIK3CA	p.H1047R	Sensitive	Clinical Trials	PI3K/AKT/mTOR inhibitors	NA	NA	missense	TCGA-D1-A16B-01A-11D-A12J-09	UCEC
KRAS	p.G12S	Both	Clinical Trials	MEK inhibitors	FDA Approved	panitumumab	missense	TCGA-G4-6297-01A-11D-1719-10	COADREAD
BRCA1	p.Q638*	Sensitive	FDA Approved	PARP inhibitors	NA	NA	nonsense	TCGA-A1-A0SH-01A-11D-A099-09	BRCA
EGFR	p.G719A	Sensitive	FDA Approved	erlotinib, afatinib	NA	NA	missense	TCGA-55-A48Z-01A-12D-A24P-08	LUAD
KRAS	p.G12V	Both	Clinical Trials	MEK inhibitors	FDA Approved	panitumumab	missense	TCGA-AG-4021-01A-01D-1733-10	COADREAD
KRAS	p.G12D	Both	Clinical Trials	MEK inhibitors	FDA Approved	panitumumab	missense	TCGA-BS-A0V7-01A-21D-A122-09	UCEC
NRAS	p.Q61R	Both	Clinical Trials	MEK inhibitors	FDA Approved	cetuximab, panitumumab	missense	TCGA-FS-A1Z0-06A-11D-A197-08	SKCM
PIK3CA	p.H1047R	Sensitive	Clinical Trials	PI3K/AKT/mTOR inhibitors	NA	NA	missense	TCGA-B6-A0X5-01A-21D-A10G-09	BRCA
NRAS	p.Q61K	Both	Clinical Trials	MEK inhibitors	FDA Approved	cetuximab, panitumumab	missense	TCGA-D3-A1Q8-06A-11D-A19A-08	SKCM
EGFR	p.LRE747in_frame_del	Sensitive	FDA Approved	erlotinib, afatinib	NA	NA	in_frame_del	TCGA-55-7573-01A-11D-2036-08	LUAD
ERBB2	p.G309A	Sensitive	Case Reports	lapatinib, neratinib	NA	NA	missense	TCGA-A8-A06Z-01A-11W-A019-09	BRCA
KRAS	p.G12D	Both	Clinical Trials	MEK inhibitors	FDA Approved	panitumumab	missense	TCGA-AA-3511-01A-21D-1835-10	COADREAD
NOTCH2	p.Q238H	Sensitive	Case Reports	Gamma secretase inhibitors	NA	NA	missense	TCGA-EA-A3HU-01A-11D-A20U-09	CESC
IDH2	p.R172K	Sensitive	Clinical Trials	IDH2 inhibitor	NA	NA	missense	TCGA-DU-5849-01A-11D-1705-08	LGG
EGFR	p.P719R	Sensitive	Clinical Trials	afatinib	NA	NA	missense	TCGA-13-0919	OV
BRAF	p.V600E	Both	FDA Approved	vemurafenib, dabrafenib, trametinib, dabrafenib + trametinib	Clinical Trials	cetuximab, panitumumab	missense	TCGA-ET-A3BS-01A-11D-A202-08	THCA
NRAS	p.G12D	Both	Case Reports	MEK inhibitors	FDA Approved	cetuximab, panitumumab	missense	TCGA-F5-6465-01A-11D-1733-10	COADREAD
EGFR	p.G598V	Sensitive	Case Reports	erlotinib	NA	NA	missense	TCGA-DU-8162-01A-21D-2253-08	LGG
KRAS	p.G12C	Both	Clinical Trials	MEK inhibitors	FDA Approved	panitumumab	missense	TCGA-BR-6802-01A-11D-1882-08	STAD
PIK3CA	p.H1047R	Sensitive	Clinical Trials	PI3K/AKT/mTOR inhibitors	NA	NA	missense	TCGA-37-3783-01A-01D-1267-08	LUSC
BRAF	p.V600E	Both	FDA Approved	vemurafenib, dabrafenib, trametinib, dabrafenib + trametinib	Clinical Trials	cetuximab, panitumumab	missense	TCGA-D9-A3Z3-06A-11D-A23B-08	SKCM
MAP2K2	p.L46F	Both	Case Reports	ERK inhibitors	Preclinical	BRAF inhibitors, MEK inhibitors	missense	TCGA-FS-A4F8-06A-11D-A25O-08	SKCM
BRAF	p.V600E	Both	FDA Approved	vemurafenib, dabrafenib, trametinib, dabrafenib + trametinib	Clinical Trials	cetuximab, panitumumab	missense	TCGA-FS-A4F8-06A-11D-A25O-08	SKCM
NRAS	p.Q61K	Both	Clinical Trials	MEK inhibitors	FDA Approved	cetuximab, panitumumab	missense	TCGA-EL-A4K6-01A-12D-A257-08	THCA
PDGFRA	p.V815A	Sensitive	Clinical Trials	imatinib	NA	NA	missense	TCGA-AP-A051-01A-21W-A027-09	UCEC
PIK3CA	p.E542K	Sensitive	Case Reports	mTOR inhibitors	NA	NA	missense	TCGA-LP-A7HU-01A-11D-A33O-09	CESC
PIK3CA	p.E545K	Sensitive	Case Reports	mTOR inhibitors	NA	NA	missense	TCGA-LP-A7HU-01A-11D-A33O-09	CESC
IDH1	p.R132H	Sensitive	Case Reports	IDH1 inhibitor	NA	NA	missense	TCGA-DU-8166-01A-11D-2253-08	LGG
IDH1	p.R132H	Sensitive	Case Reports	IDH1 inhibitor	NA	NA	missense	TCGA-DU-7009-01A-11D-2024-08	LGG
KRAS	p.G12V	Both	Clinical Trials	MEK inhibitors	FDA Approved	panitumumab	missense	TCGA-55-6970-01A-11D-1945-08	LUAD
EGFR	p.R108K	Sensitive	Case Reports	erlotinib	NA	NA	missense	TCGA-HT-8110-01A-11D-2395-08	LGG
PIK3CA	p.E545K	Sensitive	Case Reports	mTOR inhibitors	NA	NA	missense	TCGA-DK-A3WW-01A-22D-A23M-08	BLCA
KRAS	p.G12V	Both	Clinical Trials	MEK inhibitors	FDA Approved	panitumumab	missense	TCGA-09-1672	OV
PIK3CA	p.H1047R	Sensitive	Clinical Trials	PI3K/AKT/mTOR inhibitors	NA	NA	missense	TCGA-C8-A12Y-01A-11D-A12B-09	BRCA
KRAS	p.G12D	Both	Clinical Trials	MEK inhibitors	FDA Approved	panitumumab	missense	TCGA-CD-5798-01A-11D-1600-08	STAD
KRAS	p.G12C	Both	Clinical Trials	MEK inhibitors	FDA Approved	panitumumab	missense	TCGA-35-3615	LUAD
AKT1	p.E17K	Sensitive	Clinical Trials	AKT inhibitors	NA	NA	missense	TCGA-OL-A5RU-01A-11D-A28B-09	BRCA
PIK3CA	p.E545K	Sensitive	Case Reports	mTOR inhibitors	NA	NA	missense	TCGA-P3-A5QF-01A-11D-A28R-08	HNSC
IDH1	p.R132H	Sensitive	Case Reports	IDH1 inhibitor	NA	NA	missense	TCGA-DB-A4XE-01A-11D-A27K-08	LGG
NRAS	p.G12D	Both	Case Reports	MEK inhibitors	FDA Approved	cetuximab, panitumumab	missense	TCGA-EE-A2GJ-06A-11D-A196-08	SKCM
PIK3CA	p.E545K	Sensitive	Case Reports	mTOR inhibitors	NA	NA	missense	TCGA-CM-5860-01A-01D-1650-10	COADREAD
BRCA2	p.E387*	Sensitive	FDA Approved	PARP inhibitors	NA	NA	nonsense	TCGA-AX-A05Z-01A-11W-A027-09	UCEC
BRCA2	p.E897*	Sensitive	FDA Approved	PARP inhibitors	NA	NA	nonsense	TCGA-AX-A05Z-01A-11W-A027-09	UCEC
BRCA2	p.E2476*	Sensitive	FDA Approved	PARP inhibitors	NA	NA	nonsense	TCGA-AX-A05Z-01A-11W-A027-09	UCEC
KRAS	p.G12R	Both	Clinical Trials	MEK inhibitors	FDA Approved	panitumumab	missense	TCGA-AA-3556-01A-01W-0831-10	COADREAD
KRAS	p.G12V	Both	Clinical Trials	MEK inhibitors	FDA Approved	panitumumab	missense	TCGA-AP-A05P-01A-11W-A062-09	UCEC
ERBB2	p.L755S	Sensitive	Case Reports	neratinib	NA	NA	missense	TCGA-AC-A3YI-01A-21D-A23C-09	BRCA
PIK3CA	p.E542K	Sensitive	Case Reports	mTOR inhibitors	NA	NA	missense	TCGA-A2-A1G0-01A-11D-A13L-09	BRCA
IDH2	p.R172K	Sensitive	Clinical Trials	IDH2 inhibitor	NA	NA	missense	TCGA-HT-8113-01A-11D-2395-08	LGG
FLT3	p.D835Y	Both	Preclinical	lestaurtinib	Case Reports	sorafenib	missense	TCGA-AB-2947-03A-01W-0745-08	LAML
NRAS	p.Q61R	Both	Clinical Trials	MEK inhibitors	FDA Approved	cetuximab, panitumumab	missense	TCGA-EB-A5SG-06A-11D-A30X-08	SKCM
FGFR2	p.S252W	Sensitive	Case Reports	FGFR inhibitors	NA	NA	missense	TCGA-AP-A0LP-01A-12D-A10B-09	UCEC
PIK3CA	p.H1047R	Sensitive	Clinical Trials	PI3K/AKT/mTOR inhibitors	NA	NA	missense	TCGA-AU-6004-01A-11D-1719-10	COADREAD
PIK3CA	p.H1047R	Sensitive	Clinical Trials	PI3K/AKT/mTOR inhibitors	NA	NA	missense	TCGA-A2-A3KC-01A-11D-A20S-09	BRCA
KRAS	p.G12D	Both	Clinical Trials	MEK inhibitors	FDA Approved	panitumumab	missense	TCGA-MP-A4T8-01A-11D-A24P-08	LUAD
EGFR	p.R108K	Sensitive	Case Reports	erlotinib	NA	NA	missense	TCGA-06-0876-01A-01W-0424-08	GBM
EGFR	p.G598V	Sensitive	Case Reports	erlotinib	NA	NA	missense	TCGA-06-0876-01A-01W-0424-08	GBM
NOTCH1	p.S2364G	Sensitive	Clinical Trials	steroids early setting	NA	NA	missense	TCGA-EP-A26S-01A-11D-A16V-10	LIHC
BRAF	p.V600E	Both	FDA Approved	vemurafenib, dabrafenib, trametinib, dabrafenib + trametinib	Clinical Trials	cetuximab, panitumumab	missense	TCGA-DT-5265-01A-21D-1826-10	COADREAD
NRAS	p.Q61R	Both	Clinical Trials	MEK inhibitors	FDA Approved	cetuximab, panitumumab	missense	TCGA-61-2095	OV
PIK3CA	p.E542K	Sensitive	Case Reports	mTOR inhibitors	NA	NA	missense	TCGA-IR-A3LF-01A-21D-A22X-09	CESC
PIK3CA	p.E542K	Sensitive	Case Reports	mTOR inhibitors	NA	NA	missense	TCGA-E9-A1RA-01A-11D-A14G-09	BRCA
ERBB2	p.V777L	Sensitive	Case Reports	lapatinib, neratinib	NA	NA	missense	TCGA-AD-6888-01A-11D-1924-10	COADREAD
NRAS	p.Q61R	Both	Clinical Trials	MEK inhibitors	FDA Approved	cetuximab, panitumumab	missense	TCGA-EM-A4G1-01A-11D-A257-08	THCA
PIK3CA	p.E545K	Sensitive	Case Reports	mTOR inhibitors	NA	NA	missense	TCGA-80-5607-01A-31D-1945-08	LUAD
BRAF	p.V600E	Both	FDA Approved	vemurafenib, dabrafenib, trametinib, dabrafenib + trametinib	Clinical Trials	cetuximab, panitumumab	missense	TCGA-80-5607-01A-31D-1945-08	LUAD
EGFR	p.ELREA746in_frame_del	Sensitive	FDA Approved	erlotinib, afatinib	NA	NA	in_frame_del	TCGA-17-Z032-01A-01W-0746-08	LUAD
IDH1	p.R132H	Sensitive	Case Reports	IDH1 inhibitor	NA	NA	missense	TCGA-CS-6667-01A-12D-2024-08	LGG
PIK3CA	p.E542K	Sensitive	Case Reports	mTOR inhibitors	NA	NA	missense	TCGA-D1-A0ZU-01A-11D-A10M-09	UCEC
KRAS	p.G12C	Both	Clinical Trials	MEK inhibitors	FDA Approved	panitumumab	missense	TCGA-55-8097-01A-11D-2238-08	LUAD
NRAS	p.Q61R	Both	Clinical Trials	MEK inhibitors	FDA Approved	cetuximab, panitumumab	missense	TCGA-A5-A0GH-01A-21W-A062-09	UCEC
PIK3CA	p.E545K	Sensitive	Case Reports	mTOR inhibitors	NA	NA	missense	TCGA-CV-7177-01A-11D-2012-08	HNSC
ERBB2	p.G776in_frame_insVC	Sensitive	Clinical Trials	trastuzumab	NA	NA	in_frame_ins	TCGA-05-4434-01A-01D-1265-08	LUAD
IDH1	p.R132H	Sensitive	Case Reports	IDH1 inhibitor	NA	NA	missense	TCGA-HT-7607-01A-11D-2086-08	LGG
KRAS	p.G12V	Both	Clinical Trials	MEK inhibitors	FDA Approved	panitumumab	missense	TCGA-17-Z020-01A-01W-0746-08	LUAD
BRAF	p.V600K	Sensitive	FDA Approved	dabrafenib, RAF inhibitor	NA	NA	missense	TCGA-EE-A29E-06A-11D-A197-08	SKCM
BRAF	p.V600E	Both	FDA Approved	vemurafenib, dabrafenib, trametinib, dabrafenib + trametinib	Clinical Trials	cetuximab, panitumumab	missense	TCGA-DJ-A13U-01A-11D-A10S-08	THCA
PIK3CA	p.E542K	Sensitive	Case Reports	mTOR inhibitors	NA	NA	missense	TCGA-A2-A0D1-01A-11W-A050-09	BRCA
PIK3CA	p.E545K	Sensitive	Case Reports	mTOR inhibitors	NA	NA	missense	TCGA-D5-6529-01A-11D-1771-10	COADREAD
KRAS	p.G13D	Both	Clinical Trials	cetuximab	FDA Approved	panitumumab	missense	TCGA-D5-6529-01A-11D-1771-10	COADREAD
PIK3CA	p.H1047R	Sensitive	Clinical Trials	PI3K/AKT/mTOR inhibitors	NA	NA	missense	TCGA-E2-A15L-01A-11D-A12B-09	BRCA
BRCA1	p.K292fs	Sensitive	FDA Approved	PARP inhibitors	NA	NA	frame_shift_del_unspecified	TCGA-BR-7851-01A-11D-2201-08	STAD
PIK3CA	p.H1047R	Sensitive	Clinical Trials	PI3K/AKT/mTOR inhibitors	NA	NA	missense	TCGA-BR-7851-01A-11D-2201-08	STAD
BRAF	p.V600E	Both	FDA Approved	vemurafenib, dabrafenib, trametinib, dabrafenib + trametinib	Clinical Trials	cetuximab, panitumumab	missense	TCGA-DJ-A4UW-01A-11D-A257-08	THCA
KRAS	p.Q61H	Both	Clinical Trials	MEK inhibitors	FDA Approved	panitumumab	missense	TCGA-AG-3742-01A-11D-1657-10	COADREAD
PIK3CA	p.E545K	Sensitive	Case Reports	mTOR inhibitors	NA	NA	missense	TCGA-75-6214-01A-41D-1945-08	LUAD
PIK3CA	p.H1047R	Sensitive	Clinical Trials	PI3K/AKT/mTOR inhibitors	NA	NA	missense	TCGA-A8-A081-01A-11W-A019-09	BRCA
EGFR	p.ELREA746in_frame_del	Sensitive	FDA Approved	erlotinib, afatinib	NA	NA	in_frame_del	TCGA-97-8547-01A-11D-2393-08	LUAD
BRAF	p.V600E	Both	FDA Approved	vemurafenib, dabrafenib, trametinib, dabrafenib + trametinib	Clinical Trials	cetuximab, panitumumab	missense	TCGA-AZ-6598-01A-11D-1771-10	COADREAD
AKT1	p.E17K	Sensitive	Clinical Trials	AKT inhibitors	NA	NA	missense	TCGA-C8-A26V-01A-11D-A16D-09	BRCA
SF3B1	p.K700E	Sensitive	Case Reports	spliceosome inhibitor	NA	NA	missense	TCGA-C8-A26V-01A-11D-A16D-09	BRCA
NRAS	p.Q61R	Both	Clinical Trials	MEK inhibitors	FDA Approved	cetuximab, panitumumab	missense	TCGA-FY-A3W9-01A-11D-A22D-08	THCA
PIK3CA	p.E545K	Sensitive	Case Reports	mTOR inhibitors	NA	NA	missense	TCGA-AN-A0FS-01A-11W-A050-09	BRCA
PIK3CA	p.E545K	Sensitive	Case Reports	mTOR inhibitors	NA	NA	missense	TCGA-AR-A5QP-01A-11D-A28B-09	BRCA
ESR1	p.Y537C	Both	Clinical Trials	novel estrogen receptor degrader	Clinical Trials	anti-estrogens	missense	TCGA-A5-A0GN-01A-11W-A062-09	UCEC
IDH1	p.R132H	Sensitive	Case Reports	IDH1 inhibitor	NA	NA	missense	TCGA-HW-A5KJ-01A-12D-A27K-08	LGG
BRAF	p.V600E	Both	FDA Approved	vemurafenib, dabrafenib, trametinib, dabrafenib + trametinib	Clinical Trials	cetuximab, panitumumab	missense	TCGA-GF-A4EO-06A-12D-A24R-08	SKCM
BRAF	p.V600E	Both	FDA Approved	vemurafenib, dabrafenib, trametinib, dabrafenib + trametinib	Clinical Trials	cetuximab, panitumumab	missense	TCGA-DJ-A4V2-01A-11D-A257-08	THCA
BRAF	p.V600E	Both	FDA Approved	vemurafenib, dabrafenib, trametinib, dabrafenib + trametinib	Clinical Trials	cetuximab, panitumumab	missense	TCGA-55-7903-01A-11D-2167-08	LUAD
AKT1	p.E17K	Sensitive	Clinical Trials	AKT inhibitors	NA	NA	missense	TCGA-A6-5661-01A-01D-1650-10	COADREAD
BRAF	p.V600E	Both	FDA Approved	vemurafenib, dabrafenib, trametinib, dabrafenib + trametinib	Clinical Trials	cetuximab, panitumumab	missense	TCGA-A6-5661-01A-01D-1650-10	COADREAD
IDH1	p.R132H	Sensitive	Case Reports	IDH1 inhibitor	NA	NA	missense	TCGA-HT-7468-01A-11D-2024-08	LGG
PIK3CA	p.H1047R	Sensitive	Clinical Trials	PI3K/AKT/mTOR inhibitors	NA	NA	missense	TCGA-D8-A1JS-01A-11D-A13L-09	BRCA
BRAF	p.V600E	Both	FDA Approved	vemurafenib, dabrafenib, trametinib, dabrafenib + trametinib	Clinical Trials	cetuximab, panitumumab	missense	TCGA-HT-8015-01B-11D-A289-08	LGG
BRAF	p.V600R	Sensitive	FDA Approved	dabrafenib, RAF inhibitor	NA	NA	missense	TCGA-ER-A193-06A-12D-A197-08	SKCM
KRAS	p.G12V	Both	Clinical Trials	MEK inhibitors	FDA Approved	panitumumab	missense	TCGA-55-8090-01A-11D-2238-08	LUAD
IDH1	p.R132H	Sensitive	Case Reports	IDH1 inhibitor	NA	NA	missense	TCGA-CS-4942-01A-01D-1468-08	LGG
BRAF	p.V600E	Both	FDA Approved	vemurafenib, dabrafenib, trametinib, dabrafenib + trametinib	Clinical Trials	cetuximab, panitumumab	missense	TCGA-EL-A3CW-01A-11D-A19J-08	THCA
IDH1	p.R132H	Sensitive	Case Reports	IDH1 inhibitor	NA	NA	missense	TCGA-HT-7474-01A-11D-2024-08	LGG
KRAS	p.G12R	Both	Clinical Trials	MEK inhibitors	FDA Approved	panitumumab	missense	TCGA-99-7458-01A-11D-2036-08	LUAD
KRAS	p.G12C	Both	Clinical Trials	MEK inhibitors	FDA Approved	panitumumab	missense	TCGA-BG-A187-01A-11D-A12J-09	UCEC
PIK3CA	p.E542K	Sensitive	Case Reports	mTOR inhibitors	NA	NA	missense	TCGA-D1-A17K-01A-11D-A12J-09	UCEC
IDH1	p.R132H	Sensitive	Case Reports	IDH1 inhibitor	NA	NA	missense	TCGA-AB-2945-03A-01W-0733-08	LAML
FLT3	p.D835E	Both	Preclinical	lestaurtinib	Case Reports	sorafenib	missense	TCGA-AB-2945-03A-01W-0733-08	LAML
KIT	p.D816V	Both	Preclinical	dasatinib	Clinical Trials	imatinib	missense	TCGA-AB-2945-03A-01W-0733-08	LAML
AKT1	p.E17K	Sensitive	Clinical Trials	AKT inhibitors	NA	NA	missense	TCGA-55-7724-01A-11D-2167-08	LUAD
PIK3CA	p.E542K	Sensitive	Case Reports	mTOR inhibitors	NA	NA	missense	TCGA-55-7724-01A-11D-2167-08	LUAD
NRAS	p.Q61R	Both	Clinical Trials	MEK inhibitors	FDA Approved	cetuximab, panitumumab	missense	TCGA-D9-A6EA-06A-11D-A30X-08	SKCM
NOTCH2	p.P2311R	Sensitive	Case Reports	Gamma secretase inhibitors	NA	NA	missense	TCGA-44-A47G-01A-21D-A24D-08	LUAD
KRAS	p.G12C	Both	Clinical Trials	MEK inhibitors	FDA Approved	panitumumab	missense	TCGA-86-7713-01A-11D-2063-08	LUAD
BRAF	p.V600E	Both	FDA Approved	vemurafenib, dabrafenib, trametinib, dabrafenib + trametinib	Clinical Trials	cetuximab, panitumumab	missense	TCGA-IM-A3EB-01A-11D-A202-08	THCA
KRAS	p.G12A	Both	Clinical Trials	MEK inhibitors	FDA Approved	panitumumab	missense	TCGA-CK-4947-01B-11D-1650-10	COADREAD
BRAF	p.V600E	Both	FDA Approved	vemurafenib, dabrafenib, trametinib, dabrafenib + trametinib	Clinical Trials	cetuximab, panitumumab	missense	TCGA-J8-A3YE-01A-12D-A23M-08	THCA
PIK3CA	p.H1047R	Sensitive	Clinical Trials	PI3K/AKT/mTOR inhibitors	NA	NA	missense	TCGA-H7-7774-01A-21D-2078-08	HNSC
EGFR	p.G598V	Sensitive	Case Reports	erlotinib	NA	NA	missense	TCGA-12-0619-01A-01D-1492-08	GBM
GNAS	p.R201C	Sensitive	Case Reports	JAK inhibitors	NA	NA	missense	TCGA-BR-7707-01A-11D-2053-08	STAD
KRAS	p.G12D	Both	Clinical Trials	MEK inhibitors	FDA Approved	panitumumab	missense	TCGA-BR-7707-01A-11D-2053-08	STAD
KIT	p.K642N	Sensitive	FDA Approved	imatinib	NA	NA	missense	TCGA-BR-8059-01A-11D-2340-08	STAD
KRAS	p.G12D	Both	Clinical Trials	MEK inhibitors	FDA Approved	panitumumab	missense	TCGA-BR-8059-01A-11D-2340-08	STAD
AKT1	p.E17K	Sensitive	Clinical Trials	AKT inhibitors	NA	NA	missense	TCGA-GM-A2DN-01A-11D-A17W-09	BRCA
KRAS	p.G12D	Both	Clinical Trials	MEK inhibitors	FDA Approved	panitumumab	missense	TCGA-49-4510-01A-01D-1265-08	LUAD
PIK3CA	p.E545K	Sensitive	Case Reports	mTOR inhibitors	NA	NA	missense	TCGA-D8-A1JN-01A-11D-A13L-09	BRCA
BRAF	p.V600E	Both	FDA Approved	vemurafenib, dabrafenib, trametinib, dabrafenib + trametinib	Clinical Trials	cetuximab, panitumumab	missense	TCGA-DE-A0Y3-01B-11D-A10S-08	THCA
BRCA1	p.T392fs	Sensitive	FDA Approved	PARP inhibitors	NA	NA	frame_shift_del_unspecified	TCGA-A7-A26H-01A-11D-A167-09	BRCA
PIK3CA	p.H1047R	Sensitive	Clinical Trials	PI3K/AKT/mTOR inhibitors	NA	NA	missense	TCGA-A7-A26H-01A-11D-A167-09	BRCA
PIK3CA	p.H1047R	Sensitive	Clinical Trials	PI3K/AKT/mTOR inhibitors	NA	NA	missense	TCGA-E2-A1BD-01A-11D-A12Q-09	BRCA
KRAS	p.Q61K	Both	Clinical Trials	MEK inhibitors	FDA Approved	panitumumab	missense	TCGA-EB-A5UM-01A-11D-A30X-08	SKCM
PIK3CA	p.E542K	Sensitive	Case Reports	mTOR inhibitors	NA	NA	missense	TCGA-C5-A1BM-01A-11D-A13W-08	CESC
NOTCH2	p.R2298W	Sensitive	Case Reports	Gamma secretase inhibitors	NA	NA	missense	TCGA-C5-A2LX-01A-11D-A18J-09	CESC
BRAF	p.V600E	Both	FDA Approved	vemurafenib, dabrafenib, trametinib, dabrafenib + trametinib	Clinical Trials	cetuximab, panitumumab	missense	TCGA-E3-A3E2-01A-11D-A20C-08	THCA
KRAS	p.G12A	Both	Clinical Trials	MEK inhibitors	FDA Approved	panitumumab	missense	TCGA-F5-6812-01A-11D-1826-10	COADREAD
AKT1	p.E17K	Sensitive	Clinical Trials	AKT inhibitors	NA	NA	missense	TCGA-BH-A0BS-01A-11D-A12Q-09	BRCA
PIK3CA	p.E545K	Sensitive	Case Reports	mTOR inhibitors	NA	NA	missense	TCGA-D8-A27L-01A-11D-A16D-09	BRCA
BRAF	p.V600E	Both	FDA Approved	vemurafenib, dabrafenib, trametinib, dabrafenib + trametinib	Clinical Trials	cetuximab, panitumumab	missense	TCGA-EE-A3AH-06A-11D-A196-08	SKCM
PIK3CA	p.H1047R	Sensitive	Clinical Trials	PI3K/AKT/mTOR inhibitors	NA	NA	missense	TCGA-B6-A0IK-01A-12W-A071-09	BRCA
BRAF	p.V600E	Both	FDA Approved	vemurafenib, dabrafenib, trametinib, dabrafenib + trametinib	Clinical Trials	cetuximab, panitumumab	missense	TCGA-EL-A3CV-01A-11D-A19J-08	THCA
BRAF	p.V600E	Both	FDA Approved	vemurafenib, dabrafenib, trametinib, dabrafenib + trametinib	Clinical Trials	cetuximab, panitumumab	missense	TCGA-EB-A5SE-01A-11D-A30X-08	SKCM
BRCA2	p.K481*	Sensitive	FDA Approved	PARP inhibitors	NA	NA	nonsense	TCGA-AP-A056-01A-11W-A027-09	UCEC
KRAS	p.G13D	Both	Clinical Trials	cetuximab	FDA Approved	panitumumab	missense	TCGA-AP-A056-01A-11W-A027-09	UCEC
IDH1	p.R132H	Sensitive	Case Reports	IDH1 inhibitor	NA	NA	missense	TCGA-FG-8186-01A-11D-2253-08	LGG
EGFR	p.A289V	Sensitive	Case Reports	erlotinib	NA	NA	missense	TCGA-14-0790-01B-01D-1494-08	GBM
KRAS	p.Q61H	Both	Clinical Trials	MEK inhibitors	FDA Approved	panitumumab	missense	TCGA-AP-A0LG-01A-11W-A062-09	UCEC
KRAS	p.G12C	Both	Clinical Trials	MEK inhibitors	FDA Approved	panitumumab	missense	TCGA-05-4244-01A-01D-1105-08	LUAD
PDGFRA	p.E571K	Sensitive	Clinical Trials	imatinib	NA	NA	missense	TCGA-AO-A12D-01A-11D-A10Y-09	BRCA
NRAS	p.Q61K	Both	Clinical Trials	MEK inhibitors	FDA Approved	cetuximab, panitumumab	missense	TCGA-EM-A22L-01A-11D-A17V-08	THCA
BRAF	p.V600E	Both	FDA Approved	vemurafenib, dabrafenib, trametinib, dabrafenib + trametinib	Clinical Trials	cetuximab, panitumumab	missense	TCGA-DJ-A3UK-01A-11D-A22D-08	THCA
BRAF	p.V600E	Both	FDA Approved	vemurafenib, dabrafenib, trametinib, dabrafenib + trametinib	Clinical Trials	cetuximab, panitumumab	missense	TCGA-DJ-A3UY-01A-21D-A22D-08	THCA
NRAS	p.Q61R	Both	Clinical Trials	MEK inhibitors	FDA Approved	cetuximab, panitumumab	missense	TCGA-BJ-A2N7-01A-11D-A18F-08	THCA
SF3B1	p.K700E	Sensitive	Case Reports	spliceosome inhibitor	NA	NA	missense	TCGA-EW-A1P5-01A-11D-A142-09	BRCA
IDH1	p.R132H	Sensitive	Case Reports	IDH1 inhibitor	NA	NA	missense	TCGA-HT-7467-01A-11D-2024-08	LGG
NRAS	p.Q61R	Both	Clinical Trials	MEK inhibitors	FDA Approved	cetuximab, panitumumab	missense	TCGA-DJ-A3UP-01A-11D-A22D-08	THCA
GNAS	p.R201C	Sensitive	Case Reports	JAK inhibitors	NA	NA	missense	TCGA-A8-A09T-01A-11W-A019-09	BRCA
PIK3CA	p.H1047R	Sensitive	Clinical Trials	PI3K/AKT/mTOR inhibitors	NA	NA	missense	TCGA-CN-A498-01A-11D-A24D-08	HNSC
BRAF	p.G469A	Both	Case Reports	EGFR TKIs + MEK inhibitors in EGFR mutant	Case Reports	EGFR TKIs	missense	TCGA-CM-6169-01A-11D-1650-10	COADREAD
PIK3CA	p.E545K	Sensitive	Case Reports	mTOR inhibitors	NA	NA	missense	TCGA-DB-A64Q-01A-11D-A29Q-08	LGG
IDH1	p.R132H	Sensitive	Case Reports	IDH1 inhibitor	NA	NA	missense	TCGA-DB-A64Q-01A-11D-A29Q-08	LGG
PIK3CA	p.E545K	Sensitive	Case Reports	mTOR inhibitors	NA	NA	missense	TCGA-BH-A0B0-01A-21D-A10Y-09	BRCA
PIK3CA	p.E545K	Sensitive	Case Reports	mTOR inhibitors	NA	NA	missense	TCGA-66-2766-01A-01D-1522-08	LUSC
BRAF	p.V600E	Both	FDA Approved	vemurafenib, dabrafenib, trametinib, dabrafenib + trametinib	Clinical Trials	cetuximab, panitumumab	missense	TCGA-EL-A3CT-01A-12D-A202-08	THCA
KRAS	p.G12V	Both	Clinical Trials	MEK inhibitors	FDA Approved	panitumumab	missense	TCGA-05-4390-01A-02D-1753-08	LUAD
KRAS	p.G12A	Both	Clinical Trials	MEK inhibitors	FDA Approved	panitumumab	missense	TCGA-B5-A0K6-01A-11W-A062-09	UCEC
CTNNB1	p.S37C	Sensitive	Clinical Trials	everolimus + letrozole	NA	NA	missense	TCGA-BG-A0LW-01A-11W-A062-09	UCEC
NRAS	p.G12D	Both	Case Reports	MEK inhibitors	FDA Approved	cetuximab, panitumumab	missense	TCGA-DM-A1D9-01A-11D-A152-10	COADREAD
KDR	p.R791Q	Sensitive	Case Reports	TKI258	NA	NA	missense	TCGA-DM-A1D9-01A-11D-A152-10	COADREAD
KRAS	p.G13D	Both	Clinical Trials	cetuximab	FDA Approved	panitumumab	missense	TCGA-DM-A1D9-01A-11D-A152-10	COADREAD
BRAF	p.V600E	Both	FDA Approved	vemurafenib, dabrafenib, trametinib, dabrafenib + trametinib	Clinical Trials	cetuximab, panitumumab	missense	TCGA-A6-6653-01A-11D-1771-10	COADREAD
BRCA2	p.E387*	Sensitive	FDA Approved	PARP inhibitors	NA	NA	nonsense	TCGA-CM-4752-01A-01D-1408-10	COADREAD
NRAS	p.Q61R	Both	Clinical Trials	MEK inhibitors	FDA Approved	cetuximab, panitumumab	missense	TCGA-DJ-A13S-01A-11D-A10S-08	THCA
EZH2	p.Y641N	Sensitive	Case Reports	EZH2 inhibitor	NA	NA	missense	TCGA-EE-A3AF-06A-11D-A196-08	SKCM
BRAF	p.V600E	Both	FDA Approved	vemurafenib, dabrafenib, trametinib, dabrafenib + trametinib	Clinical Trials	cetuximab, panitumumab	missense	TCGA-EE-A3AF-06A-11D-A196-08	SKCM
PIK3CA	p.E545K	Sensitive	Case Reports	mTOR inhibitors	NA	NA	missense	TCGA-B5-A0K7-01A-11W-A10C-09	UCEC
BRAF	p.V600E	Both	FDA Approved	vemurafenib, dabrafenib, trametinib, dabrafenib + trametinib	Clinical Trials	cetuximab, panitumumab	missense	TCGA-DJ-A4V4-01A-11D-A257-08	THCA
BRAF	p.V600E	Both	FDA Approved	vemurafenib, dabrafenib, trametinib, dabrafenib + trametinib	Clinical Trials	cetuximab, panitumumab	missense	TCGA-FS-A1ZD-06A-11D-A197-08	SKCM
KRAS	p.G12D	Both	Clinical Trials	MEK inhibitors	FDA Approved	panitumumab	missense	TCGA-FS-A1ZK-06A-11D-A197-08	SKCM
KRAS	p.G12V	Both	Clinical Trials	MEK inhibitors	FDA Approved	panitumumab	missense	TCGA-D5-5538-01A-01D-1650-10	COADREAD
PIK3CA	p.E542K	Sensitive	Case Reports	mTOR inhibitors	NA	NA	missense	TCGA-K4-A3WS-01A-11D-A22Z-08	BLCA
BRCA2	p.Q2870*	Sensitive	FDA Approved	PARP inhibitors	NA	NA	nonsense	TCGA-K4-A3WS-01A-11D-A22Z-08	BLCA
BRAF	p.V600E	Both	FDA Approved	vemurafenib, dabrafenib, trametinib, dabrafenib + trametinib	Clinical Trials	cetuximab, panitumumab	missense	TCGA-DJ-A3UO-01A-11D-A22D-08	THCA
KRAS	p.G12C	Both	Clinical Trials	MEK inhibitors	FDA Approved	panitumumab	missense	TCGA-DM-A1D6-01A-21D-A152-10	COADREAD
MTOR	p.I1973F	Sensitive	Preclinical	everolimus	NA	NA	missense	TCGA-E2-A15O-01A-11D-A10Y-09	BRCA
PIK3CA	p.H1047R	Sensitive	Clinical Trials	PI3K/AKT/mTOR inhibitors	NA	NA	missense	TCGA-A2-A0EQ-01A-11W-A050-09	BRCA
KIT	p.R5C	Both	FDA Approved	imatinib, sunitinib, regorafenib	Clinical Trials	imatinib (low dose)	missense	TCGA-HU-A4G9-01A-11D-A24D-08	STAD
KRAS	p.A146P	Both	Case Reports	MEK inhibitors + PI3K pathway inhibitors	Clinical Trials	cetuximab, panitumumab	missense	TCGA-73-4670-01A-01D-1265-08	LUAD
IDH1	p.R132H	Sensitive	Case Reports	IDH1 inhibitor	NA	NA	missense	TCGA-14-4157-01A-01D-1353-08	GBM
NRAS	p.Q61R	Both	Clinical Trials	MEK inhibitors	FDA Approved	cetuximab, panitumumab	missense	TCGA-FS-A4FD-06A-11D-A25O-08	SKCM
BRCA2	p.N986fs	Sensitive	FDA Approved	PARP inhibitors	NA	NA	frame_shift_del_unspecified	TCGA-BR-4184-01A-01D-1126-08	STAD
NOTCH1	p.A2339T	Sensitive	Clinical Trials	steroids early setting	NA	NA	missense	TCGA-BR-4184-01A-01D-1126-08	STAD
KRAS	p.G12D	Both	Clinical Trials	MEK inhibitors	FDA Approved	panitumumab	missense	TCGA-BR-4184-01A-01D-1126-08	STAD
KRAS	p.G12V	Both	Clinical Trials	MEK inhibitors	FDA Approved	panitumumab	missense	TCGA-F4-6807-01A-11D-1835-10	COADREAD
AKT1	p.E17K	Sensitive	Clinical Trials	AKT inhibitors	NA	NA	missense	TCGA-E2-A570-01A-11D-A29N-09	BRCA
KRAS	p.G12S	Both	Clinical Trials	MEK inhibitors	FDA Approved	panitumumab	missense	TCGA-CM-4744-01A-01D-1408-10	COADREAD
EGFR	p.G598V	Sensitive	Case Reports	erlotinib	NA	NA	missense	TCGA-26-1439-01A-01D-1353-08	GBM
NOTCH2	p.P2384T	Sensitive	Case Reports	Gamma secretase inhibitors	NA	NA	missense	TCGA-G3-A25Y-01A-11D-A16V-10	LIHC
PIK3CA	p.H1047R	Sensitive	Clinical Trials	PI3K/AKT/mTOR inhibitors	NA	NA	missense	TCGA-LL-A50Y-01A-11D-A25Q-09	BRCA
KIT	p.S451C	Both	FDA Approved	imatinib, sunitinib, regorafenib	Clinical Trials	imatinib (low dose)	missense	TCGA-EB-A5SH-06A-11D-A30X-08	SKCM
PIK3CA	p.E545K	Sensitive	Case Reports	mTOR inhibitors	NA	NA	missense	TCGA-AC-A2FO-01A-11D-A17W-09	BRCA
BRAF	p.V600E	Both	FDA Approved	vemurafenib, dabrafenib, trametinib, dabrafenib + trametinib	Clinical Trials	cetuximab, panitumumab	missense	TCGA-BJ-A4O9-01A-11D-A257-08	THCA
GNAQ	p.Q209P	Sensitive	Clinical Trials	selumetinib	NA	NA	missense	TCGA-RP-A690-06A-11D-A30X-08	SKCM
BRAF	p.V600E	Both	FDA Approved	vemurafenib, dabrafenib, trametinib, dabrafenib + trametinib	Clinical Trials	cetuximab, panitumumab	missense	TCGA-DJ-A1QD-01A-11D-A14W-08	THCA
PIK3CA	p.E545K	Sensitive	Case Reports	mTOR inhibitors	NA	NA	missense	TCGA-AD-6890-01A-11D-1924-10	COADREAD
PIK3CA	p.H1047R	Sensitive	Clinical Trials	PI3K/AKT/mTOR inhibitors	NA	NA	missense	TCGA-A2-A04W-01A-31D-A10Y-09	BRCA
NRAS	p.Q61K	Both	Clinical Trials	MEK inhibitors	FDA Approved	cetuximab, panitumumab	missense	TCGA-D3-A2JO-06A-11D-A196-08	SKCM
NOTCH2	p.G2213L	Sensitive	Case Reports	Gamma secretase inhibitors	NA	NA	missense	TCGA-D3-A2JO-06A-11D-A196-08	SKCM
BRAF	p.V600E	Both	FDA Approved	vemurafenib, dabrafenib, trametinib, dabrafenib + trametinib	Clinical Trials	cetuximab, panitumumab	missense	TCGA-FS-A1ZH-06A-11D-A197-08	SKCM
KRAS	p.G12V	Both	Clinical Trials	MEK inhibitors	FDA Approved	panitumumab	missense	TCGA-55-7815-01A-11D-2167-08	LUAD
KRAS	p.G12D	Both	Clinical Trials	MEK inhibitors	FDA Approved	panitumumab	missense	TCGA-AA-A00Q-01A-01W-A005-10	COADREAD
IDH1	p.R132H	Sensitive	Case Reports	IDH1 inhibitor	NA	NA	missense	TCGA-IK-8125-01A-11D-2253-08	LGG
IDH1	p.R132H	Sensitive	Case Reports	IDH1 inhibitor	NA	NA	missense	TCGA-FG-5962-01B-11D-1893-08	LGG
KRAS	p.G12V	Both	Clinical Trials	MEK inhibitors	FDA Approved	panitumumab	missense	TCGA-CA-5796-01A-01D-1650-10	COADREAD
BRAF	p.V600E	Both	FDA Approved	vemurafenib, dabrafenib, trametinib, dabrafenib + trametinib	Clinical Trials	cetuximab, panitumumab	missense	TCGA-EB-A42Z-01A-12D-A24R-08	SKCM
NRAS	p.G12C	Both	Case Reports	ERK inhibitors	FDA Approved	cetuximab, panitumumab	missense	TCGA-BR-6455-01A-11D-1800-08	STAD
ERBB2	p.S310F	Sensitive	Case Reports	ERBB2 TKIs, trastuzumab	NA	NA	missense	TCGA-CG-5730-01A-11D-1600-08	STAD
NRAS	p.G12C	Both	Case Reports	ERK inhibitors	FDA Approved	cetuximab, panitumumab	missense	TCGA-DC-5337-01A-01D-1657-10	COADREAD
BRAF	p.V600E	Both	FDA Approved	vemurafenib, dabrafenib, trametinib, dabrafenib + trametinib	Clinical Trials	cetuximab, panitumumab	missense	TCGA-FK-A3SB-01A-11D-A22D-08	THCA
PIK3CA	p.E542K	Sensitive	Case Reports	mTOR inhibitors	NA	NA	missense	TCGA-BH-A1ET-01A-11D-A135-09	BRCA
IDH1	p.R132H	Sensitive	Case Reports	IDH1 inhibitor	NA	NA	missense	TCGA-HT-7606-01A-11D-2086-08	LGG
KRAS	p.G13D	Both	Clinical Trials	cetuximab	FDA Approved	panitumumab	missense	TCGA-AD-6548-01A-11D-1835-10	COADREAD
NRAS	p.Q61K	Both	Clinical Trials	MEK inhibitors	FDA Approved	cetuximab, panitumumab	missense	TCGA-P6-A5OG-01A-22D-A29I-10	ACC
EGFR	p.L861Q	Sensitive	FDA Approved	erlotinib, afatinib	NA	NA	missense	TCGA-05-5423-01A-01D-1625-08	LUAD
ERBB2	p.V777L	Sensitive	Case Reports	lapatinib, neratinib	NA	NA	missense	TCGA-BH-A0C1-01B-11D-A12B-09	BRCA
NRAS	p.Q61R	Both	Clinical Trials	MEK inhibitors	FDA Approved	cetuximab, panitumumab	missense	TCGA-G2-A2EF-01A-12D-A18F-08	BLCA
BRAF	p.V600E	Both	FDA Approved	vemurafenib, dabrafenib, trametinib, dabrafenib + trametinib	Clinical Trials	cetuximab, panitumumab	missense	TCGA-DJ-A2Q3-01A-11D-A18F-08	THCA
PIK3CA	p.H1047R	Sensitive	Clinical Trials	PI3K/AKT/mTOR inhibitors	NA	NA	missense	TCGA-HU-8602-01A-11D-2394-08	STAD
BRCA2	p.D946fs	Sensitive	FDA Approved	PARP inhibitors	NA	NA	frame_shift_del_unspecified	TCGA-HU-8602-01A-11D-2394-08	STAD
EGFR	p.A289V	Sensitive	Case Reports	erlotinib	NA	NA	missense	TCGA-14-0786-01B-01D-1492-08	GBM
KRAS	p.G12S	Both	Clinical Trials	MEK inhibitors	FDA Approved	panitumumab	missense	TCGA-B5-A11O-01A-11D-A122-09	UCEC
CTNNB1	p.S37C	Sensitive	Clinical Trials	everolimus + letrozole	NA	NA	missense	TCGA-D1-A17T-01A-11D-A12J-09	UCEC
BRCA2	p.E1646fs	Sensitive	FDA Approved	PARP inhibitors	NA	NA	frame_shift_del_unspecified	TCGA-D8-A1XL-01A-11D-A14K-09	BRCA
FGFR2	p.N550K	Both	Case Reports	ponatinib	Preclinical	Dovitinib	missense	TCGA-D8-A1XL-01A-11D-A14K-09	BRCA
FGFR2	p.N549K	Sensitive	Case Reports	FGFR inhibitors	NA	NA	missense	TCGA-D8-A1XL-01A-11D-A14K-09	BRCA
KRAS	p.G12D	Both	Clinical Trials	MEK inhibitors	FDA Approved	panitumumab	missense	TCGA-CM-5863-01A-21D-1835-10	COADREAD
NRAS	p.Q61R	Both	Clinical Trials	MEK inhibitors	FDA Approved	cetuximab, panitumumab	missense	TCGA-ER-A2NB-01A-12D-A196-08	SKCM
KRAS	p.Q61H	Both	Clinical Trials	MEK inhibitors	FDA Approved	panitumumab	missense	TCGA-BR-8370-01A-11D-2340-08	STAD
KRAS	p.G13D	Both	Clinical Trials	cetuximab	FDA Approved	panitumumab	missense	TCGA-AF-5654-01A-01D-1657-10	COADREAD
BRAF	p.V600E	Both	FDA Approved	vemurafenib, dabrafenib, trametinib, dabrafenib + trametinib	Clinical Trials	cetuximab, panitumumab	missense	TCGA-DJ-A3UM-01A-11D-A22D-08	THCA
NOTCH2	p.R2453Q	Sensitive	Case Reports	Gamma secretase inhibitors	NA	NA	missense	TCGA-D5-6536-01A-11D-1719-10	COADREAD
KRAS	p.G12R	Both	Clinical Trials	MEK inhibitors	FDA Approved	panitumumab	missense	TCGA-D5-6536-01A-11D-1719-10	COADREAD
PIK3CA	p.E542K	Sensitive	Case Reports	mTOR inhibitors	NA	NA	missense	TCGA-A7-A4SF-01A-11D-A25Q-09	BRCA
PIK3CA	p.H1047R	Sensitive	Clinical Trials	PI3K/AKT/mTOR inhibitors	NA	NA	missense	TCGA-E9-A1RC-01A-11D-A159-09	BRCA
GNAS	p.R201H	Sensitive	Case Reports	JAK inhibitors	NA	NA	missense	TCGA-78-7540-01A-11D-2063-08	LUAD
KRAS	p.G12V	Both	Clinical Trials	MEK inhibitors	FDA Approved	panitumumab	missense	TCGA-78-7540-01A-11D-2063-08	LUAD
BRCA1	p.Q75*	Sensitive	FDA Approved	PARP inhibitors	NA	NA	nonsense	TCGA-MP-A4TF-01A-11D-A25L-08	LUAD
KRAS	p.G12C	Both	Clinical Trials	MEK inhibitors	FDA Approved	panitumumab	missense	TCGA-MP-A4TF-01A-11D-A25L-08	LUAD
PIK3CA	p.E542K	Sensitive	Case Reports	mTOR inhibitors	NA	NA	missense	TCGA-BH-A0HF-01A-11W-A071-09	BRCA
PIK3CA	p.E545K	Sensitive	Case Reports	mTOR inhibitors	NA	NA	missense	TCGA-AP-A0LN-01A-11W-A062-09	UCEC
BRAF	p.V600E	Both	FDA Approved	vemurafenib, dabrafenib, trametinib, dabrafenib + trametinib	Clinical Trials	cetuximab, panitumumab	missense	TCGA-FS-A1ZN-01A-11D-A197-08	SKCM
NOTCH2	p.R2130I	Sensitive	Case Reports	Gamma secretase inhibitors	NA	NA	missense	TCGA-FS-A1ZN-01A-11D-A197-08	SKCM
PIK3CA	p.E542K	Sensitive	Case Reports	mTOR inhibitors	NA	NA	missense	TCGA-A2-A04N-01A-11D-A10Y-09	BRCA
EGFR	p.ELREA746in_frame_del	Sensitive	FDA Approved	erlotinib, afatinib	NA	NA	in_frame_del	TCGA-55-8206-01A-11D-2238-08	LUAD
BRCA2	p.Y839fs	Sensitive	FDA Approved	PARP inhibitors	NA	NA	frame_shift_del_unspecified	TCGA-MT-A67D-01A-31D-A30E-08	HNSC
ARAF	p.S214C	Sensitive	Preclinical	sorafenib	NA	NA	missense	TCGA-55-7727-01A-11D-2167-08	LUAD
IDH1	p.R132H	Sensitive	Case Reports	IDH1 inhibitor	NA	NA	missense	TCGA-HT-7902-01A-12D-2395-08	LGG
BRAF	p.V600E	Both	FDA Approved	vemurafenib, dabrafenib, trametinib, dabrafenib + trametinib	Clinical Trials	cetuximab, panitumumab	missense	TCGA-FE-A235-01A-11D-A16O-08	THCA
PIK3CA	p.H1047R	Sensitive	Clinical Trials	PI3K/AKT/mTOR inhibitors	NA	NA	missense	TCGA-AN-A049-01A-21W-A019-09	BRCA
EGFR	p.A289V	Sensitive	Case Reports	erlotinib	NA	NA	missense	TCGA-06-0743-01A-01D-1492-08	GBM
EGFR	p.774in_frame_insH	Both	Clinical Trials	HSP90 inhibitors	FDA Approved	gefitinib	in_frame_ins	TCGA-50-6673-01A-11D-1945-08	LUAD
PIK3CA	p.E545K	Sensitive	Case Reports	mTOR inhibitors	NA	NA	missense	TCGA-UF-A7JF-01A-11D-A34J-08	HNSC
HRAS	p.G12D	Sensitive	Case Reports	mTOR inhibitors	NA	NA	missense	TCGA-GD-A3OQ-01A-32D-A21Z-08	BLCA
IDH1	p.R132H	Sensitive	Case Reports	IDH1 inhibitor	NA	NA	missense	TCGA-HT-7692-01A-12D-2253-08	LGG
PIK3CA	p.H1047R	Sensitive	Clinical Trials	PI3K/AKT/mTOR inhibitors	NA	NA	missense	TCGA-C8-A26W-01A-11D-A16D-09	BRCA
IDH1	p.R132H	Sensitive	Case Reports	IDH1 inhibitor	NA	NA	missense	TCGA-FG-A60J-01A-11D-A289-08	LGG
BRAF	p.V600K	Sensitive	FDA Approved	dabrafenib, RAF inhibitor	NA	NA	missense	TCGA-IH-A3EA-01A-11D-A20D-08	SKCM
PIK3CA	p.H1047R	Sensitive	Clinical Trials	PI3K/AKT/mTOR inhibitors	NA	NA	missense	TCGA-B6-A0IP-01A-11D-A045-09	BRCA
BRAF	p.V600E	Both	FDA Approved	vemurafenib, dabrafenib, trametinib, dabrafenib + trametinib	Clinical Trials	cetuximab, panitumumab	missense	TCGA-DA-A1I8-06A-11D-A197-08	SKCM
NRAS	p.Q61L	Both	Clinical Trials	MEK inhibitors	FDA Approved	cetuximab, panitumumab	missense	TCGA-12-3649-01A-01D-1495-08	GBM
KIT	p.L576P	Sensitive	FDA Approved	imatinib, sunitinib, regorafenib	NA	NA	missense	TCGA-D3-A51K-06A-11D-A25O-08	SKCM
PIK3CA	p.H1047R	Sensitive	Clinical Trials	PI3K/AKT/mTOR inhibitors	NA	NA	missense	TCGA-BH-A0EB-01A-11W-A050-09	BRCA
NRAS	p.G12D	Both	Case Reports	MEK inhibitors	FDA Approved	cetuximab, panitumumab	missense	TCGA-F5-6863-01A-11D-1924-10	COADREAD
NRAS	p.Q61R	Both	Clinical Trials	MEK inhibitors	FDA Approved	cetuximab, panitumumab	missense	TCGA-BF-A1PZ-01A-11D-A19A-08	SKCM
NRAS	p.Q61H	Both	Clinical Trials	MEK inhibitors	FDA Approved	cetuximab, panitumumab	missense	TCGA-AB-2838-03A-01W-0726-08	LAML
EGFR	p.G598V	Sensitive	Case Reports	erlotinib	NA	NA	missense	TCGA-32-1982-01A-01D-1494-08	GBM
ESR1	p.Y537S	Both	Clinical Trials	novel estrogen receptor degrader	Clinical Trials	anti-estrogens	missense	TCGA-B5-A11F-01A-11D-A10M-09	UCEC
MAP2K1	p.P124S	Both	Preclinical	BRAF inhibitors in BRAF mutant tumor	Clinical Trials	BRAF inhibitors	missense	TCGA-EE-A29R-06A-11D-A197-08	SKCM
NRAS	p.Q61R	Both	Clinical Trials	MEK inhibitors	FDA Approved	cetuximab, panitumumab	missense	TCGA-EE-A29R-06A-11D-A197-08	SKCM
IDH2	p.R140Q	Sensitive	Clinical Trials	IDH2 inhibitor	NA	NA	missense	TCGA-AB-2850-03B-01W-0728-08	LAML
KIT	p.K642E	Sensitive	FDA Approved	imatinib	NA	NA	missense	TCGA-EB-A57M-01A-51D-A30X-08	SKCM
KRAS	p.Q61H	Both	Clinical Trials	MEK inhibitors	FDA Approved	panitumumab	missense	TCGA-CG-5719-01A-11D-1600-08	STAD
BRAF	p.V600E	Both	FDA Approved	vemurafenib, dabrafenib, trametinib, dabrafenib + trametinib	Clinical Trials	cetuximab, panitumumab	missense	TCGA-DJ-A13T-01A-11D-A10S-08	THCA
PIK3CA	p.E545K	Sensitive	Case Reports	mTOR inhibitors	NA	NA	missense	TCGA-AC-A5XS-01A-11D-A29N-09	BRCA
KRAS	p.G12V	Both	Clinical Trials	MEK inhibitors	FDA Approved	panitumumab	missense	TCGA-95-A4VN-01A-11D-A25L-08	LUAD
ERBB2	p.D769Y	Sensitive	Case Reports	trastuzumab, lapatinib, neratinib	NA	NA	missense	TCGA-BH-A1FE-01A-11D-A13L-09	BRCA
KRAS	p.G12D	Both	Clinical Trials	MEK inhibitors	FDA Approved	panitumumab	missense	TCGA-69-8254-01A-11D-2284-08	LUAD
IDH1	p.R132H	Sensitive	Case Reports	IDH1 inhibitor	NA	NA	missense	TCGA-CS-5394-01A-01D-1468-08	LGG
IDH1	p.R132H	Sensitive	Case Reports	IDH1 inhibitor	NA	NA	missense	TCGA-HW-7486-01A-11D-2024-08	LGG
MET	p.V1092I	Sensitive	Case Reports	crizotinib	NA	NA	missense	TCGA-DZ-6132-01A-11D-1961-08	KIRP
EGFR	p.770in_frame_insGL	Both	Clinical Trials	HSP90 inhibitors	FDA Approved	gefitinib	in_frame_ins	TCGA-17-Z048-01A-01W-0746-08	LUAD
IDH1	p.R132H	Sensitive	Case Reports	IDH1 inhibitor	NA	NA	missense	TCGA-CS-4944-01A-01D-1468-08	LGG
BRAF	p.V600E	Both	FDA Approved	vemurafenib, dabrafenib, trametinib, dabrafenib + trametinib	Clinical Trials	cetuximab, panitumumab	missense	TCGA-E3-A3E3-01A-11D-A20C-08	THCA
KRAS	p.G12R	Both	Clinical Trials	MEK inhibitors	FDA Approved	panitumumab	missense	TCGA-D3-A51T-06A-11D-A25O-08	SKCM
PIK3CA	p.H1047R	Sensitive	Clinical Trials	PI3K/AKT/mTOR inhibitors	NA	NA	missense	TCGA-B5-A0JS-01A-11D-A10B-09	UCEC
KRAS	p.Q61H	Both	Clinical Trials	MEK inhibitors	FDA Approved	panitumumab	missense	TCGA-B5-A0JS-01A-11D-A10B-09	UCEC
PIK3CA	p.E542K	Sensitive	Case Reports	mTOR inhibitors	NA	NA	missense	TCGA-E9-A1RD-01A-11D-A159-09	BRCA
KRAS	p.G12C	Both	Clinical Trials	MEK inhibitors	FDA Approved	panitumumab	missense	TCGA-B5-A11J-01A-11D-A122-09	UCEC
KRAS	p.G13D	Both	Clinical Trials	cetuximab	FDA Approved	panitumumab	missense	TCGA-DY-A1DF-01A-11D-A152-10	COADREAD
KIT	p.N486I	Both	FDA Approved	imatinib, sunitinib, regorafenib	Clinical Trials	imatinib (low dose)	missense	TCGA-BA-6869-01A-11D-1870-08	HNSC
NRAS	p.Q61K	Both	Clinical Trials	MEK inhibitors	FDA Approved	cetuximab, panitumumab	missense	TCGA-FS-A1ZE-06A-11D-A197-08	SKCM
NRAS	p.Q61R	Both	Clinical Trials	MEK inhibitors	FDA Approved	cetuximab, panitumumab	missense	TCGA-D9-A3Z4-01A-11D-A23B-08	SKCM
GNAS	p.R201C	Sensitive	Case Reports	JAK inhibitors	NA	NA	missense	TCGA-G3-A7M7-01A-12D-A34Z-10	LIHC
BRCA2	p.N310fs	Sensitive	FDA Approved	PARP inhibitors	NA	NA	frame_shift_del_unspecified	TCGA-CH-5754-01A-11D-1576-08	PRAD
NRAS	p.G12C	Both	Case Reports	ERK inhibitors	FDA Approved	cetuximab, panitumumab	missense	TCGA-AG-4022-01A-01D-1733-10	COADREAD
PIK3CA	p.H1047R	Sensitive	Clinical Trials	PI3K/AKT/mTOR inhibitors	NA	NA	missense	TCGA-A8-A092-01A-11W-A019-09	BRCA
BRAF	p.V600E	Both	FDA Approved	vemurafenib, dabrafenib, trametinib, dabrafenib + trametinib	Clinical Trials	cetuximab, panitumumab	missense	TCGA-AY-6196-01A-11D-1719-10	COADREAD
KRAS	p.G12C	Both	Clinical Trials	MEK inhibitors	FDA Approved	panitumumab	missense	TCGA-78-7166-01A-12D-2063-08	LUAD
BRAF	p.V600K	Sensitive	FDA Approved	dabrafenib, RAF inhibitor	NA	NA	missense	TCGA-ER-A19K-01A-21D-A197-08	SKCM
IDH1	p.R132H	Sensitive	Case Reports	IDH1 inhibitor	NA	NA	missense	TCGA-DU-8163-01A-11D-2253-08	LGG
NRAS	p.G13D	Both	Case Reports	MEK inhibitors	FDA Approved	cetuximab, panitumumab	missense	TCGA-AB-2967-03A-01D-0739-09	LAML
PIK3CA	p.E542K	Sensitive	Case Reports	mTOR inhibitors	NA	NA	missense	TCGA-GC-A3OO-01A-11D-A22Z-08	BLCA
MTOR	p.L1460P	Sensitive	Case Reports	rapamycin	NA	NA	missense	TCGA-BP-5175-01A-01D-1429-08	KIRC
IDH1	p.R132H	Sensitive	Case Reports	IDH1 inhibitor	NA	NA	missense	TCGA-HT-7877-01A-11D-2395-08	LGG
IDH1	p.R132H	Sensitive	Case Reports	IDH1 inhibitor	NA	NA	missense	TCGA-HT-7610-01A-21D-2086-08	LGG
KRAS	p.G12A	Both	Clinical Trials	MEK inhibitors	FDA Approved	panitumumab	missense	TCGA-55-6984-01A-11D-1945-08	LUAD
ERBB2	p.S310F	Sensitive	Case Reports	ERBB2 TKIs, trastuzumab	NA	NA	missense	TCGA-BR-7957-01A-11D-2201-08	STAD
NRAS	p.Q61K	Both	Clinical Trials	MEK inhibitors	FDA Approved	cetuximab, panitumumab	missense	TCGA-EB-A44O-01A-11D-A25O-08	SKCM
ERBB2	p.L755S	Sensitive	Case Reports	neratinib	NA	NA	missense	TCGA-BH-A18P-01A-11D-A12B-09	BRCA
BRCA2	p.S1882*	Sensitive	FDA Approved	PARP inhibitors	NA	NA	nonsense	TCGA-09-2050	OV
KRAS	p.G12V	Both	Clinical Trials	MEK inhibitors	FDA Approved	panitumumab	missense	TCGA-N9-A4Q3-01A-11D-A28R-08	UCS
PIK3CA	p.E545K	Sensitive	Case Reports	mTOR inhibitors	NA	NA	missense	TCGA-CN-5365-01A-01D-1434-08	HNSC
KRAS	p.G12D	Both	Clinical Trials	MEK inhibitors	FDA Approved	panitumumab	missense	TCGA-AZ-6601-01A-11D-1771-10	COADREAD
NRAS	p.Q61L	Both	Clinical Trials	MEK inhibitors	FDA Approved	cetuximab, panitumumab	missense	TCGA-EE-A29S-06A-11D-A197-08	SKCM
PIK3CA	p.E545K	Sensitive	Case Reports	mTOR inhibitors	NA	NA	missense	TCGA-13-0800	OV
PIK3CA	p.E545K	Sensitive	Case Reports	mTOR inhibitors	NA	NA	missense	TCGA-BG-A0RY-01A-11D-A10B-09	UCEC
FGFR2	p.S252W	Sensitive	Case Reports	FGFR inhibitors	NA	NA	missense	TCGA-BG-A0RY-01A-11D-A10B-09	UCEC
PIK3CA	p.E542K	Sensitive	Case Reports	mTOR inhibitors	NA	NA	missense	TCGA-CC-5259-01A-31D-A20W-10	LIHC
IDH1	p.R132H	Sensitive	Case Reports	IDH1 inhibitor	NA	NA	missense	TCGA-FG-7634-01A-11D-2086-08	LGG
IDH2	p.R172K	Sensitive	Clinical Trials	IDH2 inhibitor	NA	NA	missense	TCGA-HT-7476-01A-11D-2024-08	LGG
NRAS	p.Q61R	Both	Clinical Trials	MEK inhibitors	FDA Approved	cetuximab, panitumumab	missense	TCGA-EL-A3ZH-01A-31D-A23M-08	THCA
PIK3CA	p.H1047R	Sensitive	Clinical Trials	PI3K/AKT/mTOR inhibitors	NA	NA	missense	TCGA-AM-5820-01A-01D-1650-10	COADREAD
BRAF	p.V600E	Both	FDA Approved	vemurafenib, dabrafenib, trametinib, dabrafenib + trametinib	Clinical Trials	cetuximab, panitumumab	missense	TCGA-AM-5820-01A-01D-1650-10	COADREAD
MET	p.T1010I	Sensitive	Case Reports	crizotinib	NA	NA	missense	TCGA-AM-5820-01A-01D-1650-10	COADREAD
PIK3CA	p.E545K	Sensitive	Case Reports	mTOR inhibitors	NA	NA	missense	TCGA-CR-7404-01A-11D-2129-08	HNSC
BRAF	p.L597R	Both	Preclinical	BRAF inhibitors	Preclinical	PLX4720	missense	TCGA-KC-A4BN-01A-61D-A257-08	PRAD
BRAF	p.V600K	Sensitive	FDA Approved	dabrafenib, RAF inhibitor	NA	NA	missense	TCGA-BF-A3DL-01A-11D-A20D-08	SKCM
SF3B1	p.K700E	Sensitive	Case Reports	spliceosome inhibitor	NA	NA	missense	TCGA-BH-A0DQ-01A-11D-A099-09	BRCA
PIK3CA	p.E542K	Sensitive	Case Reports	mTOR inhibitors	NA	NA	missense	TCGA-B6-A408-01A-12D-A243-09	BRCA
PIK3CA	p.H1047R	Sensitive	Clinical Trials	PI3K/AKT/mTOR inhibitors	NA	NA	missense	TCGA-21-5782-01A-01D-1632-08	LUSC
PIK3CA	p.E545K	Sensitive	Case Reports	mTOR inhibitors	NA	NA	missense	TCGA-CN-4723-01A-01D-1434-08	HNSC
BRCA1	p.W137*	Sensitive	FDA Approved	PARP inhibitors	NA	NA	nonsense	TCGA-DA-A3F8-06A-11D-A20D-08	SKCM
BRAF	p.V600K	Sensitive	FDA Approved	dabrafenib, RAF inhibitor	NA	NA	missense	TCGA-DA-A3F8-06A-11D-A20D-08	SKCM
PIK3CA	p.E545K	Sensitive	Case Reports	mTOR inhibitors	NA	NA	missense	TCGA-A2-A4RY-01A-31D-A25Q-09	BRCA
IDH1	p.R132H	Sensitive	Case Reports	IDH1 inhibitor	NA	NA	missense	TCGA-HT-7602-01A-21D-2086-08	LGG
PIK3CA	p.H1047R	Sensitive	Clinical Trials	PI3K/AKT/mTOR inhibitors	NA	NA	missense	TCGA-G4-6586-01A-11D-1771-10	COADREAD
BRAF	p.V600E	Both	FDA Approved	vemurafenib, dabrafenib, trametinib, dabrafenib + trametinib	Clinical Trials	cetuximab, panitumumab	missense	TCGA-G4-6586-01A-11D-1771-10	COADREAD
KIT	p.R49H	Both	FDA Approved	imatinib, sunitinib, regorafenib	Clinical Trials	imatinib (low dose)	missense	TCGA-G4-6586-01A-11D-1771-10	COADREAD
BRAF	p.V600K	Sensitive	FDA Approved	dabrafenib, RAF inhibitor	NA	NA	missense	TCGA-EE-A2GB-06A-11D-A197-08	SKCM
BRAF	p.V600E	Both	FDA Approved	vemurafenib, dabrafenib, trametinib, dabrafenib + trametinib	Clinical Trials	cetuximab, panitumumab	missense	TCGA-D3-A5GR-06A-11D-A27K-08	SKCM
NOTCH2	p.P2280S	Sensitive	Case Reports	Gamma secretase inhibitors	NA	NA	missense	TCGA-D3-A5GR-06A-11D-A27K-08	SKCM
NOTCH2	p.S2350T	Sensitive	Case Reports	Gamma secretase inhibitors	NA	NA	missense	TCGA-MT-A67A-01A-11D-A30E-08	HNSC
IDH1	p.R132H	Sensitive	Case Reports	IDH1 inhibitor	NA	NA	missense	TCGA-DU-6408-01A-11D-1705-08	LGG
IDH1	p.R132H	Sensitive	Case Reports	IDH1 inhibitor	NA	NA	missense	TCGA-DU-7298-01A-11D-2024-08	LGG
IDH1	p.R132H	Sensitive	Case Reports	IDH1 inhibitor	NA	NA	missense	TCGA-E1-5304-01A-01D-1468-08	LGG
BRAF	p.V600E	Both	FDA Approved	vemurafenib, dabrafenib, trametinib, dabrafenib + trametinib	Clinical Trials	cetuximab, panitumumab	missense	TCGA-EM-A2P1-01A-11D-A202-08	THCA
BRAF	p.G466V	Sensitive	Case Reports	dasatinib	NA	NA	missense	TCGA-55-8511-01A-11D-2393-08	LUAD
KIT	p.D851G	Both	Clinical Trials	ponatinib	Clinical Trials	imatinib	missense	TCGA-ND-A4WC-01A-21D-A28R-08	UCS
KIT	p.P627L	Sensitive	FDA Approved	imatinib	NA	NA	missense	TCGA-ND-A4WC-01A-21D-A28R-08	UCS
KRAS	p.G13C	Both	Clinical Trials	MEK inhibitors	FDA Approved	panitumumab	missense	TCGA-A6-6654-01A-21D-1835-10	COADREAD
NOTCH2	p.S2427R	Sensitive	Case Reports	Gamma secretase inhibitors	NA	NA	missense	TCGA-DR-A0ZM-01A-12D-A10S-08	CESC
IDH1	p.R132H	Sensitive	Case Reports	IDH1 inhibitor	NA	NA	missense	TCGA-06-6701-01A-11D-1845-08	GBM
PIK3CA	p.E542K	Sensitive	Case Reports	mTOR inhibitors	NA	NA	missense	TCGA-60-2726-01A-01D-1522-08	LUSC
MAP2K1	p.C121S	Both	Case Reports	novel MEK inhibitors	Case Reports	BRAF inhibitors, MEK inhibitors	missense	TCGA-BR-8683-01A-11D-2394-08	STAD
BRAF	p.V600E	Both	FDA Approved	vemurafenib, dabrafenib, trametinib, dabrafenib + trametinib	Clinical Trials	cetuximab, panitumumab	missense	TCGA-DJ-A2Q6-01A-11D-A18F-08	THCA
PIK3CA	p.E542K	Sensitive	Case Reports	mTOR inhibitors	NA	NA	missense	TCGA-BH-A0DP-01A-21W-A071-09	BRCA
BRAF	p.V600E	Both	FDA Approved	vemurafenib, dabrafenib, trametinib, dabrafenib + trametinib	Clinical Trials	cetuximab, panitumumab	missense	TCGA-E3-A3E1-01A-11D-A20C-08	THCA
NRAS	p.Q61K	Both	Clinical Trials	MEK inhibitors	FDA Approved	cetuximab, panitumumab	missense	TCGA-35-4123-01A-01D-1105-08	LUAD
IDH1	p.R132H	Sensitive	Case Reports	IDH1 inhibitor	NA	NA	missense	TCGA-27-2521-01A-01D-1494-08	GBM
IDH1	p.R132H	Sensitive	Case Reports	IDH1 inhibitor	NA	NA	missense	TCGA-DB-5279-01A-01D-1468-08	LGG
ERBB2	p.S310F	Sensitive	Case Reports	ERBB2 TKIs, trastuzumab	NA	NA	missense	TCGA-DK-A1A3-01A-11D-A13W-08	BLCA
KRAS	p.G12V	Both	Clinical Trials	MEK inhibitors	FDA Approved	panitumumab	missense	TCGA-55-6642-01A-11D-1855-08	LUAD
IDH1	p.R132H	Sensitive	Case Reports	IDH1 inhibitor	NA	NA	missense	TCGA-P5-A5EW-01A-11D-A27K-08	LGG
PIK3CA	p.E545K	Sensitive	Case Reports	mTOR inhibitors	NA	NA	missense	TCGA-NG-A4VW-01A-11D-A28R-08	UCS
PIK3CA	p.H1047R	Sensitive	Clinical Trials	PI3K/AKT/mTOR inhibitors	NA	NA	missense	TCGA-D1-A17M-01A-21D-A12J-09	UCEC
FGFR2	p.S252W	Sensitive	Case Reports	FGFR inhibitors	NA	NA	missense	TCGA-DI-A0WH-01A-12D-A12J-09	UCEC
NRAS	p.G12D	Both	Case Reports	MEK inhibitors	FDA Approved	cetuximab, panitumumab	missense	TCGA-D1-A17F-01A-11D-A12J-09	UCEC
PIK3CA	p.H1047R	Sensitive	Clinical Trials	PI3K/AKT/mTOR inhibitors	NA	NA	missense	TCGA-D8-A1JE-01A-11D-A13L-09	BRCA
AKT1	p.E17K	Sensitive	Clinical Trials	AKT inhibitors	NA	NA	missense	TCGA-EX-A449-01A-11D-A243-09	CESC
AKT1	p.E17K	Sensitive	Clinical Trials	AKT inhibitors	NA	NA	missense	TCGA-D8-A1XU-01A-11D-A14K-09	BRCA
PIK3CA	p.E542K	Sensitive	Case Reports	mTOR inhibitors	NA	NA	missense	TCGA-EJ-5525-01A-01D-1576-08	PRAD
EGFR	p.ELREA746in_frame_del	Sensitive	FDA Approved	erlotinib, afatinib	NA	NA	in_frame_del	TCGA-75-6207-01A-11D-1753-08	LUAD
KRAS	p.G12C	Both	Clinical Trials	MEK inhibitors	FDA Approved	panitumumab	missense	TCGA-MP-A4TE-01A-22D-A25L-08	LUAD
NRAS	p.Q61R	Both	Clinical Trials	MEK inhibitors	FDA Approved	cetuximab, panitumumab	missense	TCGA-AA-3662-01A-01D-1719-10	COADREAD
IDH1	p.R132H	Sensitive	Case Reports	IDH1 inhibitor	NA	NA	missense	TCGA-DU-6397-01A-11D-1705-08	LGG
IDH1	p.R132H	Sensitive	Case Reports	IDH1 inhibitor	NA	NA	missense	TCGA-HT-7605-01A-11D-2086-08	LGG
PIK3CA	p.E545K	Sensitive	Case Reports	mTOR inhibitors	NA	NA	missense	TCGA-A8-A08B-01A-11W-A019-09	BRCA
BRAF	p.V600E	Both	FDA Approved	vemurafenib, dabrafenib, trametinib, dabrafenib + trametinib	Clinical Trials	cetuximab, panitumumab	missense	TCGA-DJ-A2PZ-01A-21D-A18F-08	THCA
FGFR2	p.N550K	Both	Case Reports	ponatinib	Preclinical	Dovitinib	missense	TCGA-AN-A0FL-01A-11W-A050-09	BRCA
FGFR2	p.N549K	Sensitive	Case Reports	FGFR inhibitors	NA	NA	missense	TCGA-AN-A0FL-01A-11W-A050-09	BRCA
PDGFRA	p.V832M	Sensitive	Clinical Trials	imatinib	NA	NA	missense	TCGA-99-8028-01A-11D-2238-08	LUAD
KRAS	p.G12C	Both	Clinical Trials	MEK inhibitors	FDA Approved	panitumumab	missense	TCGA-99-8028-01A-11D-2238-08	LUAD
BRAF	p.V600E	Both	FDA Approved	vemurafenib, dabrafenib, trametinib, dabrafenib + trametinib	Clinical Trials	cetuximab, panitumumab	missense	TCGA-D3-A5GN-06A-11D-A27K-08	SKCM
PIK3CA	p.H1047R	Sensitive	Clinical Trials	PI3K/AKT/mTOR inhibitors	NA	NA	missense	TCGA-AN-A0AJ-01A-11W-A019-09	BRCA
PIK3CA	p.E545K	Sensitive	Case Reports	mTOR inhibitors	NA	NA	missense	TCGA-CV-7406-01A-11D-2078-08	HNSC
AKT1	p.E17K	Sensitive	Clinical Trials	AKT inhibitors	NA	NA	missense	TCGA-D5-5537-01A-21D-1924-10	COADREAD
KRAS	p.A146T	Both	Case Reports	MEK inhibitors + PI3K pathway inhibitors	Clinical Trials	cetuximab, panitumumab	missense	TCGA-D5-5537-01A-21D-1924-10	COADREAD
IDH1	p.R132H	Sensitive	Case Reports	IDH1 inhibitor	NA	NA	missense	TCGA-HT-A5R5-01A-11D-A289-08	LGG
KRAS	p.G12A	Both	Clinical Trials	MEK inhibitors	FDA Approved	panitumumab	missense	TCGA-EI-6881-01A-11D-1924-10	COADREAD
KRAS	p.G12V	Both	Clinical Trials	MEK inhibitors	FDA Approved	panitumumab	missense	TCGA-EA-A4BA-01A-21D-A26G-09	CESC
ERBB2	p.L755S	Sensitive	Case Reports	neratinib	NA	NA	missense	TCGA-D1-A167-01A-11D-A12J-09	UCEC
ERBB2	p.V842I	Sensitive	Case Reports	lapatinib, neratinib	NA	NA	missense	TCGA-D1-A167-01A-11D-A12J-09	UCEC
PIK3CA	p.E545K	Sensitive	Case Reports	mTOR inhibitors	NA	NA	missense	TCGA-D8-A1Y2-01A-11D-A159-09	BRCA
IDH1	p.R132H	Sensitive	Case Reports	IDH1 inhibitor	NA	NA	missense	TCGA-HT-8012-01A-11D-2395-08	LGG
PIK3CA	p.E545K	Sensitive	Case Reports	mTOR inhibitors	NA	NA	missense	TCGA-FP-7735-01A-11D-2053-08	STAD
NOTCH1	p.G2300V	Sensitive	Clinical Trials	steroids early setting	NA	NA	missense	TCGA-55-8301-01A-11D-2284-08	LUAD
IDH1	p.R132H	Sensitive	Case Reports	IDH1 inhibitor	NA	NA	missense	TCGA-02-2483-01A-01D-1494-08	GBM
EGFR	p.L858R	Sensitive	FDA Approved	erlotinib, afatinib	NA	NA	missense	TCGA-17-Z047-01A-01W-0747-08	LUAD
ERBB2	p.D769H	Sensitive	Case Reports	trastuzumab, lapatinib, neratinib	NA	NA	missense	TCGA-FU-A40J-01A-11D-A243-09	CESC
KRAS	p.G12S	Both	Clinical Trials	MEK inhibitors	FDA Approved	panitumumab	missense	TCGA-78-8655-01A-11D-2393-08	LUAD
BRCA1	p.Q113*	Sensitive	FDA Approved	PARP inhibitors	NA	NA	nonsense	TCGA-E9-A1NC-01A-12W-A16L-09	BRCA
KRAS	p.G12V	Both	Clinical Trials	MEK inhibitors	FDA Approved	panitumumab	missense	TCGA-D1-A15W-01A-11D-A122-09	UCEC
BRAF	p.V600E	Both	FDA Approved	vemurafenib, dabrafenib, trametinib, dabrafenib + trametinib	Clinical Trials	cetuximab, panitumumab	missense	TCGA-D3-A5GU-06A-11D-A27K-08	SKCM
PIK3CA	p.E545K	Sensitive	Case Reports	mTOR inhibitors	NA	NA	missense	TCGA-A2-A0YT-01A-11D-A10G-09	BRCA
IDH1	p.R132H	Sensitive	Case Reports	IDH1 inhibitor	NA	NA	missense	TCGA-HT-A618-01A-11D-A29Q-08	LGG
IDH1	p.R132H	Sensitive	Case Reports	IDH1 inhibitor	NA	NA	missense	TCGA-E1-5302-01A-01D-1468-08	LGG
PIK3CA	p.E542K	Sensitive	Case Reports	mTOR inhibitors	NA	NA	missense	TCGA-CR-7395-01A-11D-2012-08	HNSC
HRAS	p.G12D	Sensitive	Case Reports	mTOR inhibitors	NA	NA	missense	TCGA-CR-7395-01A-11D-2012-08	HNSC
KRAS	p.G13C	Both	Clinical Trials	MEK inhibitors	FDA Approved	panitumumab	missense	TCGA-55-7910-01A-11D-2167-08	LUAD
NRAS	p.G13R	Both	Case Reports	MEK inhibitors	FDA Approved	cetuximab, panitumumab	missense	TCGA-ER-A2NC-06A-11D-A197-08	SKCM
BRAF	p.V600K	Sensitive	FDA Approved	dabrafenib, RAF inhibitor	NA	NA	missense	TCGA-ER-A2NC-06A-11D-A197-08	SKCM
BRAF	p.V600E	Both	FDA Approved	vemurafenib, dabrafenib, trametinib, dabrafenib + trametinib	Clinical Trials	cetuximab, panitumumab	missense	TCGA-06-0644-01A-02D-1492-08	GBM
KIT	p.V50M	Both	FDA Approved	imatinib, sunitinib, regorafenib	Clinical Trials	imatinib (low dose)	missense	TCGA-06-0644-01A-02D-1492-08	GBM
BRAF	p.V600E	Both	FDA Approved	vemurafenib, dabrafenib, trametinib, dabrafenib + trametinib	Clinical Trials	cetuximab, panitumumab	missense	TCGA-DJ-A3VA-01A-11D-A23M-08	THCA
BRAF	p.V600E	Both	FDA Approved	vemurafenib, dabrafenib, trametinib, dabrafenib + trametinib	Clinical Trials	cetuximab, panitumumab	missense	TCGA-EL-A3N3-01A-11D-A20C-08	THCA
EGFR	p.774in_frame_insNPH	Both	Clinical Trials	HSP90 inhibitors	FDA Approved	gefitinib	in_frame_ins	TCGA-06-0879-01A-01W-0424-08	GBM
BRAF	p.V600E	Both	FDA Approved	vemurafenib, dabrafenib, trametinib, dabrafenib + trametinib	Clinical Trials	cetuximab, panitumumab	missense	TCGA-AA-3713-01A-21D-1719-10	COADREAD
CTNNB1	p.S37C	Sensitive	Clinical Trials	everolimus + letrozole	NA	NA	missense	TCGA-BG-A0M3-01A-11W-A10C-09	UCEC
IDH1	p.R132H	Sensitive	Case Reports	IDH1 inhibitor	NA	NA	missense	TCGA-HT-7472-01A-11D-2024-08	LGG
PIK3CA	p.H1047R	Sensitive	Clinical Trials	PI3K/AKT/mTOR inhibitors	NA	NA	missense	TCGA-B6-A0WW-01A-11D-A10G-09	BRCA
PIK3CA	p.H1047R	Sensitive	Clinical Trials	PI3K/AKT/mTOR inhibitors	NA	NA	missense	TCGA-E9-A1R3-01A-31D-A14K-09	BRCA
IDH2	p.R140Q	Sensitive	Clinical Trials	IDH2 inhibitor	NA	NA	missense	TCGA-AB-2891-03A-01W-0733-08	LAML
IDH1	p.R132H	Sensitive	Case Reports	IDH1 inhibitor	NA	NA	missense	TCGA-FG-A60K-01A-11D-A29Q-08	LGG
BRAF	p.V600E	Both	FDA Approved	vemurafenib, dabrafenib, trametinib, dabrafenib + trametinib	Clinical Trials	cetuximab, panitumumab	missense	TCGA-D3-A1Q5-06A-11D-A196-08	SKCM
KRAS	p.G12C	Both	Clinical Trials	MEK inhibitors	FDA Approved	panitumumab	missense	TCGA-NJ-A55O-01A-11D-A25L-08	LUAD
NRAS	p.Q61K	Both	Clinical Trials	MEK inhibitors	FDA Approved	cetuximab, panitumumab	missense	TCGA-ER-A19W-06A-41D-A23B-08	SKCM
CDK4	p.R24C	Sensitive	Case Reports	flavopiridol	NA	NA	missense	TCGA-ER-A19W-06A-41D-A23B-08	SKCM
KRAS	p.G12C	Both	Clinical Trials	MEK inhibitors	FDA Approved	panitumumab	missense	TCGA-05-4250-01A-01D-1105-08	LUAD
BRAF	p.V600E	Both	FDA Approved	vemurafenib, dabrafenib, trametinib, dabrafenib + trametinib	Clinical Trials	cetuximab, panitumumab	missense	TCGA-BJ-A28X-01A-11D-A22D-08	THCA
EGFR	p.L858R	Sensitive	FDA Approved	erlotinib, afatinib	NA	NA	missense	TCGA-91-6835-01A-11D-1855-08	LUAD
NRAS	p.G12D	Both	Case Reports	MEK inhibitors	FDA Approved	cetuximab, panitumumab	missense	TCGA-AB-2952-03A-01W-0733-08	LAML
NOTCH2	p.R2019L	Sensitive	Case Reports	Gamma secretase inhibitors	NA	NA	missense	TCGA-HE-7129-01A-11D-1961-08	KIRP
BRAF	p.V600E	Both	FDA Approved	vemurafenib, dabrafenib, trametinib, dabrafenib + trametinib	Clinical Trials	cetuximab, panitumumab	missense	TCGA-ER-A19S-06A-11D-A196-08	SKCM
NRAS	p.Q61K	Both	Clinical Trials	MEK inhibitors	FDA Approved	cetuximab, panitumumab	missense	TCGA-FS-A1ZW-06A-12D-A197-08	SKCM
PIK3CA	p.E545K	Sensitive	Case Reports	mTOR inhibitors	NA	NA	missense	TCGA-HU-A4H3-01A-21D-A25D-08	STAD
KRAS	p.G13D	Both	Clinical Trials	cetuximab	FDA Approved	panitumumab	missense	TCGA-HU-A4H3-01A-21D-A25D-08	STAD
IDH1	p.R132H	Sensitive	Case Reports	IDH1 inhibitor	NA	NA	missense	TCGA-HT-8563-01A-11D-2395-08	LGG
PIK3CA	p.E545K	Sensitive	Case Reports	mTOR inhibitors	NA	NA	missense	TCGA-CN-6994-01A-11D-1912-08	HNSC
PIK3CA	p.E542K	Sensitive	Case Reports	mTOR inhibitors	NA	NA	missense	TCGA-22-5473-01A-01D-1632-08	LUSC
KIT	p.M552L	Sensitive	FDA Approved	imatinib, sunitinib, regorafenib	NA	NA	missense	TCGA-22-5473-01A-01D-1632-08	LUSC
IDH1	p.R132H	Sensitive	Case Reports	IDH1 inhibitor	NA	NA	missense	TCGA-CS-5393-01A-01D-1468-08	LGG
BRCA1	p.E1065*	Sensitive	FDA Approved	PARP inhibitors	NA	NA	nonsense	TCGA-17-Z042-01A-01W-0746-08	LUAD
KRAS	p.G12C	Both	Clinical Trials	MEK inhibitors	FDA Approved	panitumumab	missense	TCGA-17-Z042-01A-01W-0746-08	LUAD
BRAF	p.V600E	Both	FDA Approved	vemurafenib, dabrafenib, trametinib, dabrafenib + trametinib	Clinical Trials	cetuximab, panitumumab	missense	TCGA-D3-A3MR-06A-11D-A21A-08	SKCM
NRAS	p.Q61L	Both	Clinical Trials	MEK inhibitors	FDA Approved	cetuximab, panitumumab	missense	TCGA-D3-A3ML-06A-11D-A21A-08	SKCM
BRAF	p.V600E	Both	FDA Approved	vemurafenib, dabrafenib, trametinib, dabrafenib + trametinib	Clinical Trials	cetuximab, panitumumab	missense	TCGA-FE-A236-01A-11D-A16O-08	THCA
KIT	p.V559A	Sensitive	FDA Approved	imatinib, sunitinib, regorafenib	NA	NA	missense	TCGA-EB-A3Y7-01A-11D-A23B-08	SKCM
PIK3CA	p.E545K	Sensitive	Case Reports	mTOR inhibitors	NA	NA	missense	TCGA-D1-A16O-01A-11D-A12J-09	UCEC
KRAS	p.G13V	Both	Clinical Trials	MEK inhibitors	FDA Approved	panitumumab	missense	TCGA-D1-A16O-01A-11D-A12J-09	UCEC
KRAS	p.G12D	Both	Clinical Trials	MEK inhibitors	FDA Approved	panitumumab	missense	TCGA-CK-4950-01A-01D-1719-10	COADREAD
MAP2K1	p.P124S	Both	Preclinical	BRAF inhibitors in BRAF mutant tumor	Clinical Trials	BRAF inhibitors	missense	TCGA-D9-A4Z6-01A-12D-A25O-08	SKCM
KRAS	p.G12C	Both	Clinical Trials	MEK inhibitors	FDA Approved	panitumumab	missense	TCGA-97-7938-01A-11D-2167-08	LUAD
NRAS	p.Q61R	Both	Clinical Trials	MEK inhibitors	FDA Approved	cetuximab, panitumumab	missense	TCGA-EE-A2MC-06A-12D-A197-08	SKCM
PIK3CA	p.E542K	Sensitive	Case Reports	mTOR inhibitors	NA	NA	missense	TCGA-AX-A062-01A-11W-A027-09	UCEC
KRAS	p.G12D	Both	Clinical Trials	MEK inhibitors	FDA Approved	panitumumab	missense	TCGA-A4-8312-01A-11D-2396-08	KIRP
KRAS	p.G12V	Both	Clinical Trials	MEK inhibitors	FDA Approved	panitumumab	missense	TCGA-55-7911-01A-11D-2167-08	LUAD
KIT	p.S476G	Both	FDA Approved	imatinib, sunitinib, regorafenib	Clinical Trials	imatinib (low dose)	missense	TCGA-ES-A2HS-01A-11D-A183-10	LIHC
KRAS	p.G12D	Both	Clinical Trials	MEK inhibitors	FDA Approved	panitumumab	missense	TCGA-55-7284-01B-11D-2238-08	LUAD
GNAS	p.R201H	Sensitive	Case Reports	JAK inhibitors	NA	NA	missense	TCGA-55-7284-01B-11D-2238-08	LUAD
PIK3CA	p.E542K	Sensitive	Case Reports	mTOR inhibitors	NA	NA	missense	TCGA-CG-4474-01A-02D-1158-08	STAD
KRAS	p.G13D	Both	Clinical Trials	cetuximab	FDA Approved	panitumumab	missense	TCGA-D5-5539-01A-01D-1650-10	COADREAD
KRAS	p.G12V	Both	Clinical Trials	MEK inhibitors	FDA Approved	panitumumab	missense	TCGA-F5-6861-01A-11D-1924-10	COADREAD
IDH1	p.R132H	Sensitive	Case Reports	IDH1 inhibitor	NA	NA	missense	TCGA-DB-5281-01A-01D-1468-08	LGG
NOTCH1	p.P2514T	Sensitive	Clinical Trials	steroids early setting	NA	NA	missense	TCGA-CG-5726-01A-11D-1600-08	STAD
PIK3CA	p.E545K	Sensitive	Case Reports	mTOR inhibitors	NA	NA	missense	TCGA-CV-6948-01A-11D-1912-08	HNSC
EGFR	p.ELREA746in_frame_del	Sensitive	FDA Approved	erlotinib, afatinib	NA	NA	in_frame_del	TCGA-38-4628-01A-01D-1265-08	LUAD
BRAF	p.V600E	Both	FDA Approved	vemurafenib, dabrafenib, trametinib, dabrafenib + trametinib	Clinical Trials	cetuximab, panitumumab	missense	TCGA-EL-A3D1-01A-11D-A19J-08	THCA
EGFR	p.LREAT747in_frame_del	Sensitive	FDA Approved	erlotinib, afatinib	NA	NA	in_frame_del	TCGA-55-6981-01A-11D-1945-08	LUAD
ERBB2	p.S310F	Sensitive	Case Reports	ERBB2 TKIs, trastuzumab	NA	NA	missense	TCGA-JW-A852-01A-11D-A351-09	CESC
PIK3CA	p.E545K	Sensitive	Case Reports	mTOR inhibitors	NA	NA	missense	TCGA-JW-A852-01A-11D-A351-09	CESC
BRAF	p.V600E	Both	FDA Approved	vemurafenib, dabrafenib, trametinib, dabrafenib + trametinib	Clinical Trials	cetuximab, panitumumab	missense	TCGA-DA-A1I5-06A-11D-A197-08	SKCM
KRAS	p.G12C	Both	Clinical Trials	MEK inhibitors	FDA Approved	panitumumab	missense	TCGA-DC-6683-01A-11D-1826-10	COADREAD
KRAS	p.G12A	Both	Clinical Trials	MEK inhibitors	FDA Approved	panitumumab	missense	TCGA-D1-A16D-01A-11D-A12J-09	UCEC
BRCA2	p.S3364fs	Sensitive	FDA Approved	PARP inhibitors	NA	NA	frame_shift_del_unspecified	TCGA-EJ-7328-01A-31D-2114-08	PRAD
AKT1	p.E17K	Sensitive	Clinical Trials	AKT inhibitors	NA	NA	missense	TCGA-A8-A094-01A-11W-A019-09	BRCA
IDH1	p.R132H	Sensitive	Case Reports	IDH1 inhibitor	NA	NA	missense	TCGA-P5-A5F1-01A-11D-A289-08	LGG
EGFR	p.G598V	Sensitive	Case Reports	erlotinib	NA	NA	missense	TCGA-12-0616-01A-01D-1492-08	GBM
NRAS	p.Q61R	Both	Clinical Trials	MEK inhibitors	FDA Approved	cetuximab, panitumumab	missense	TCGA-FS-A4F5-06A-11D-A25O-08	SKCM
KRAS	p.G12V	Both	Clinical Trials	MEK inhibitors	FDA Approved	panitumumab	missense	TCGA-95-A4VP-01A-21D-A25L-08	LUAD
FGFR2	p.N550K	Both	Case Reports	ponatinib	Preclinical	Dovitinib	missense	TCGA-62-A470-01A-11D-A24D-08	LUAD
FGFR2	p.N549K	Sensitive	Case Reports	FGFR inhibitors	NA	NA	missense	TCGA-62-A470-01A-11D-A24D-08	LUAD
PIK3CA	p.H1047R	Sensitive	Clinical Trials	PI3K/AKT/mTOR inhibitors	NA	NA	missense	TCGA-AO-A1KR-01A-12D-A142-09	BRCA
NOTCH2	p.T235S	Sensitive	Case Reports	Gamma secretase inhibitors	NA	NA	missense	TCGA-KM-8477-01A-11D-2310-10	KICH
KRAS	p.G12R	Both	Clinical Trials	MEK inhibitors	FDA Approved	panitumumab	missense	TCGA-29-1696	OV
BRAF	p.V600E	Both	FDA Approved	vemurafenib, dabrafenib, trametinib, dabrafenib + trametinib	Clinical Trials	cetuximab, panitumumab	missense	TCGA-FE-A3PC-01A-11D-A21Z-08	THCA
PIK3CA	p.E545K	Sensitive	Case Reports	mTOR inhibitors	NA	NA	missense	TCGA-D8-A1J8-01A-11D-A13L-09	BRCA
KRAS	p.G12V	Both	Clinical Trials	MEK inhibitors	FDA Approved	panitumumab	missense	TCGA-29-1690	OV
PIK3CA	p.H1047R	Sensitive	Clinical Trials	PI3K/AKT/mTOR inhibitors	NA	NA	missense	TCGA-D8-A3Z6-01A-11D-A23C-09	BRCA
BRAF	p.V600E	Both	FDA Approved	vemurafenib, dabrafenib, trametinib, dabrafenib + trametinib	Clinical Trials	cetuximab, panitumumab	missense	TCGA-BJ-A0ZH-01A-11D-A10S-08	THCA
BRCA2	p.Y2884*	Sensitive	FDA Approved	PARP inhibitors	NA	NA	nonsense	TCGA-CN-5366-01A-01D-1434-08	HNSC
BRCA2	p.V2151fs	Sensitive	FDA Approved	PARP inhibitors	NA	NA	frame_shift_del_unspecified	TCGA-E9-A1R2-01A-11D-A14G-09	BRCA
NOTCH2	p.A2331S	Sensitive	Case Reports	Gamma secretase inhibitors	NA	NA	missense	TCGA-AC-A23H-01A-11D-A159-09	BRCA
BRAF	p.V600E	Both	FDA Approved	vemurafenib, dabrafenib, trametinib, dabrafenib + trametinib	Clinical Trials	cetuximab, panitumumab	missense	TCGA-D3-A1Q9-06A-11D-A19A-08	SKCM
BRAF	p.V600E	Both	FDA Approved	vemurafenib, dabrafenib, trametinib, dabrafenib + trametinib	Clinical Trials	cetuximab, panitumumab	missense	TCGA-BJ-A0Z9-01A-11D-A10S-08	THCA
KRAS	p.Q61H	Both	Clinical Trials	MEK inhibitors	FDA Approved	panitumumab	missense	TCGA-DM-A28G-01A-11D-A16V-10	COADREAD
NOTCH1	p.A1700T	Sensitive	Clinical Trials	steroids early setting	NA	NA	missense	TCGA-AD-6965-01A-11D-1924-10	COADREAD
KRAS	p.G12A	Both	Clinical Trials	MEK inhibitors	FDA Approved	panitumumab	missense	TCGA-AD-6965-01A-11D-1924-10	COADREAD
PIK3CA	p.H1047R	Sensitive	Clinical Trials	PI3K/AKT/mTOR inhibitors	NA	NA	missense	TCGA-OK-A5Q2-01A-11D-A27P-09	BRCA
BRAF	p.V600E	Both	FDA Approved	vemurafenib, dabrafenib, trametinib, dabrafenib + trametinib	Clinical Trials	cetuximab, panitumumab	missense	TCGA-EL-A3D6-01A-12D-A202-08	THCA
PIK3CA	p.H1047R	Sensitive	Clinical Trials	PI3K/AKT/mTOR inhibitors	NA	NA	missense	TCGA-HD-8634-01A-11D-2394-08	HNSC
PIK3CA	p.H1047R	Sensitive	Clinical Trials	PI3K/AKT/mTOR inhibitors	NA	NA	missense	TCGA-E2-A15K-01A-11D-A12Q-09	BRCA
FGFR2	p.N550K	Both	Case Reports	ponatinib	Preclinical	Dovitinib	missense	TCGA-E2-A15K-01A-11D-A12Q-09	BRCA
FGFR2	p.N549K	Sensitive	Case Reports	FGFR inhibitors	NA	NA	missense	TCGA-E2-A15K-01A-11D-A12Q-09	BRCA
IDH1	p.R132H	Sensitive	Case Reports	IDH1 inhibitor	NA	NA	missense	TCGA-DU-7300-01A-21D-2086-08	LGG
NRAS	p.Q61R	Both	Clinical Trials	MEK inhibitors	FDA Approved	cetuximab, panitumumab	missense	TCGA-BS-A0UJ-01A-12D-A10B-09	UCEC
PIK3CA	p.E545K	Sensitive	Case Reports	mTOR inhibitors	NA	NA	missense	TCGA-Q1-A5R1-01A-11D-A28B-09	CESC
IDH1	p.R132H	Sensitive	Case Reports	IDH1 inhibitor	NA	NA	missense	TCGA-DU-8168-01A-11D-2253-08	LGG
PIK3CA	p.E542K	Sensitive	Case Reports	mTOR inhibitors	NA	NA	missense	TCGA-E2-A1IO-01A-11D-A142-09	BRCA
IDH2	p.R140Q	Sensitive	Clinical Trials	IDH2 inhibitor	NA	NA	missense	TCGA-AB-2959-03A-01W-0733-08	LAML
AKT1	p.E17K	Sensitive	Clinical Trials	AKT inhibitors	NA	NA	missense	TCGA-55-6968-01A-11D-1945-08	LUAD
KRAS	p.G12C	Both	Clinical Trials	MEK inhibitors	FDA Approved	panitumumab	missense	TCGA-64-5778-01A-01D-1625-08	LUAD
BRAF	p.V600E	Both	FDA Approved	vemurafenib, dabrafenib, trametinib, dabrafenib + trametinib	Clinical Trials	cetuximab, panitumumab	missense	TCGA-DJ-A13P-01A-11D-A10S-08	THCA
PIK3CA	p.E545K	Sensitive	Case Reports	mTOR inhibitors	NA	NA	missense	TCGA-06-0210-02A-01D-2280-08	GBM
IDH1	p.R132H	Sensitive	Case Reports	IDH1 inhibitor	NA	NA	missense	TCGA-FG-8188-01A-11D-2253-08	LGG
NRAS	p.G12C	Both	Case Reports	ERK inhibitors	FDA Approved	cetuximab, panitumumab	missense	TCGA-AA-3558-01A-01W-0831-10	COADREAD
BRAF	p.V600E	Both	FDA Approved	vemurafenib, dabrafenib, trametinib, dabrafenib + trametinib	Clinical Trials	cetuximab, panitumumab	missense	TCGA-CE-A3ME-01A-11D-A20C-08	THCA
KRAS	p.G12D	Both	Clinical Trials	MEK inhibitors	FDA Approved	panitumumab	missense	TCGA-EI-6507-01A-11D-1733-10	COADREAD
BRAF	p.V600E	Both	FDA Approved	vemurafenib, dabrafenib, trametinib, dabrafenib + trametinib	Clinical Trials	cetuximab, panitumumab	missense	TCGA-EB-A5UN-06A-11D-A30X-08	SKCM
AKT1	p.E17K	Sensitive	Clinical Trials	AKT inhibitors	NA	NA	missense	TCGA-46-3767-01A-01D-0983-08	LUSC
BRCA2	p.V725fs	Sensitive	FDA Approved	PARP inhibitors	NA	NA	frame_shift_del_unspecified	TCGA-EJ-5495-01A-01D-1576-08	PRAD
PIK3CA	p.E545K	Sensitive	Case Reports	mTOR inhibitors	NA	NA	missense	TCGA-05-4249-01A-01D-1105-08	LUAD
KRAS	p.G12C	Both	Clinical Trials	MEK inhibitors	FDA Approved	panitumumab	missense	TCGA-05-4249-01A-01D-1105-08	LUAD
NRAS	p.G12R	Both	Case Reports	MEK inhibitors	FDA Approved	cetuximab, panitumumab	missense	TCGA-D3-A1Q1-06A-21D-A196-08	SKCM
PIK3CA	p.H1047R	Sensitive	Clinical Trials	PI3K/AKT/mTOR inhibitors	NA	NA	missense	TCGA-A8-A07G-01A-11W-A050-09	BRCA
KRAS	p.G12V	Both	Clinical Trials	MEK inhibitors	FDA Approved	panitumumab	missense	TCGA-G5-6233-01A-11D-1733-10	COADREAD
KRAS	p.G12C	Both	Clinical Trials	MEK inhibitors	FDA Approved	panitumumab	missense	TCGA-G5-6233-01A-11D-1733-10	COADREAD
KIT	p.V64A	Sensitive	FDA Approved	imatinib	NA	NA	missense	TCGA-BR-8680-01A-11D-2394-08	STAD
KRAS	p.A146T	Both	Case Reports	MEK inhibitors + PI3K pathway inhibitors	Clinical Trials	cetuximab, panitumumab	missense	TCGA-BR-8680-01A-11D-2394-08	STAD
BRAF	p.V600E	Both	FDA Approved	vemurafenib, dabrafenib, trametinib, dabrafenib + trametinib	Clinical Trials	cetuximab, panitumumab	missense	TCGA-ER-A19P-06A-11D-A196-08	SKCM
BRAF	p.G466V	Sensitive	Case Reports	dasatinib	NA	NA	missense	TCGA-50-6594-01A-11D-1753-08	LUAD
ESR1	p.D538G	Both	Clinical Trials	novel estrogen receptor degrader	Clinical Trials	anti-estrogens	missense	TCGA-BG-A0MU-01A-11D-A10B-09	UCEC
BRAF	p.V600K	Sensitive	FDA Approved	dabrafenib, RAF inhibitor	NA	NA	missense	TCGA-EE-A2GT-06A-12D-A197-08	SKCM
IDH1	p.R132H	Sensitive	Case Reports	IDH1 inhibitor	NA	NA	missense	TCGA-HT-7477-01B-11D-A289-08	LGG
BRAF	p.V600E	Both	FDA Approved	vemurafenib, dabrafenib, trametinib, dabrafenib + trametinib	Clinical Trials	cetuximab, panitumumab	missense	TCGA-D3-A3MU-06A-11D-A21A-08	SKCM
KRAS	p.G12D	Both	Clinical Trials	MEK inhibitors	FDA Approved	panitumumab	missense	TCGA-AA-3502-01A-01D-1408-10	COADREAD
GNAS	p.R201H	Sensitive	Case Reports	JAK inhibitors	NA	NA	missense	TCGA-AA-3502-01A-01D-1408-10	COADREAD
NRAS	p.Q61R	Both	Clinical Trials	MEK inhibitors	FDA Approved	cetuximab, panitumumab	missense	TCGA-EE-A2MD-06A-11D-A197-08	SKCM
PIK3CA	p.H1047R	Sensitive	Clinical Trials	PI3K/AKT/mTOR inhibitors	NA	NA	missense	TCGA-A8-A08O-01A-21W-A071-09	BRCA
FLT3	p.D835Y	Both	Preclinical	lestaurtinib	Case Reports	sorafenib	missense	TCGA-AB-2957-03A-01W-0733-08	LAML
BRAF	p.V600E	Both	FDA Approved	vemurafenib, dabrafenib, trametinib, dabrafenib + trametinib	Clinical Trials	cetuximab, panitumumab	missense	TCGA-EM-A2P3-01A-11D-A202-08	THCA
NRAS	p.Q61R	Both	Clinical Trials	MEK inhibitors	FDA Approved	cetuximab, panitumumab	missense	TCGA-D3-A3MV-06A-11D-A21A-08	SKCM
CTNNB1	p.S37C	Sensitive	Clinical Trials	everolimus + letrozole	NA	NA	missense	TCGA-IR-A3LA-01A-11D-A22X-09	CESC
BRCA2	p.Q2159*	Sensitive	FDA Approved	PARP inhibitors	NA	NA	nonsense	TCGA-IR-A3LA-01A-11D-A22X-09	CESC
IDH1	p.R132H	Sensitive	Case Reports	IDH1 inhibitor	NA	NA	missense	TCGA-HT-8105-01A-11D-2395-08	LGG
KRAS	p.G12V	Both	Clinical Trials	MEK inhibitors	FDA Approved	panitumumab	missense	TCGA-CL-5917-01A-11D-1657-10	COADREAD
PIK3CA	p.H1047R	Sensitive	Clinical Trials	PI3K/AKT/mTOR inhibitors	NA	NA	missense	TCGA-E2-A105-01A-11D-A10M-09	BRCA
PIK3CA	p.E545K	Sensitive	Case Reports	mTOR inhibitors	NA	NA	missense	TCGA-22-5491-01A-01D-1632-08	LUSC
NOTCH1	p.P2469S	Sensitive	Clinical Trials	steroids early setting	NA	NA	missense	TCGA-22-5491-01A-01D-1632-08	LUSC
PIK3CA	p.H1047R	Sensitive	Clinical Trials	PI3K/AKT/mTOR inhibitors	NA	NA	missense	TCGA-BH-A42T-01A-11D-A243-09	BRCA
PIK3CA	p.E545K	Sensitive	Case Reports	mTOR inhibitors	NA	NA	missense	TCGA-CG-5720-01A-11D-1600-08	STAD
IDH1	p.R132H	Sensitive	Case Reports	IDH1 inhibitor	NA	NA	missense	TCGA-DU-7019-01A-11D-2024-08	LGG
IDH1	p.R132H	Sensitive	Case Reports	IDH1 inhibitor	NA	NA	missense	TCGA-DB-5275-01A-01D-1468-08	LGG
IDH2	p.R140Q	Sensitive	Clinical Trials	IDH2 inhibitor	NA	NA	missense	TCGA-AB-2805-03B-01W-0728-08	LAML
AKT1	p.E17K	Sensitive	Clinical Trials	AKT inhibitors	NA	NA	missense	TCGA-BH-A0W4-01A-11D-A10G-09	BRCA
NRAS	p.Q61R	Both	Clinical Trials	MEK inhibitors	FDA Approved	cetuximab, panitumumab	missense	TCGA-H2-A2K9-01A-11D-A17V-08	THCA
BRAF	p.V600E	Both	FDA Approved	vemurafenib, dabrafenib, trametinib, dabrafenib + trametinib	Clinical Trials	cetuximab, panitumumab	missense	TCGA-ET-A3BX-01A-11D-A19J-08	THCA
KRAS	p.G13D	Both	Clinical Trials	cetuximab	FDA Approved	panitumumab	missense	TCGA-D1-A0ZS-01A-11D-A122-09	UCEC
AKT1	p.E17K	Sensitive	Clinical Trials	AKT inhibitors	NA	NA	missense	TCGA-DJ-A3VJ-01A-11D-A23M-08	THCA
BRAF	p.V600E	Both	FDA Approved	vemurafenib, dabrafenib, trametinib, dabrafenib + trametinib	Clinical Trials	cetuximab, panitumumab	missense	TCGA-DJ-A3VJ-01A-11D-A23M-08	THCA
BRAF	p.V600E	Both	FDA Approved	vemurafenib, dabrafenib, trametinib, dabrafenib + trametinib	Clinical Trials	cetuximab, panitumumab	missense	TCGA-AG-3578-01A-01W-0831-10	COADREAD
PIK3CA	p.E545K	Sensitive	Case Reports	mTOR inhibitors	NA	NA	missense	TCGA-FD-A3SO-01A-11D-A22Z-08	BLCA
KIT	p.W557R	Sensitive	FDA Approved	imatinib, sunitinib, regorafenib	NA	NA	missense	TCGA-EE-A29D-06A-11D-A197-08	SKCM
KIT	p.N822I	Both	Preclinical	sorafenib	Clinical Trials	imatinib	missense	TCGA-EE-A29D-06A-11D-A197-08	SKCM
KRAS	p.Q61K	Both	Clinical Trials	MEK inhibitors	FDA Approved	panitumumab	missense	TCGA-H2-A3RH-01A-11D-A21Z-08	THCA
PIK3CA	p.E545K	Sensitive	Case Reports	mTOR inhibitors	NA	NA	missense	TCGA-E6-A1LZ-01A-11D-A142-09	UCEC
BRCA2	p.K3015*	Sensitive	FDA Approved	PARP inhibitors	NA	NA	nonsense	TCGA-62-A46O-01A-11D-A24D-08	LUAD
KDR	p.R791Q	Sensitive	Case Reports	TKI258	NA	NA	missense	TCGA-FP-A4BE-01A-12D-A24D-08	STAD
PIK3CA	p.H1047R	Sensitive	Clinical Trials	PI3K/AKT/mTOR inhibitors	NA	NA	missense	TCGA-EW-A1PC-01B-11D-A21Q-09	BRCA
IDH1	p.R132H	Sensitive	Case Reports	IDH1 inhibitor	NA	NA	missense	TCGA-HT-8108-01A-11D-2395-08	LGG
IDH1	p.R132H	Sensitive	Case Reports	IDH1 inhibitor	NA	NA	missense	TCGA-CH-5772-01A-11D-1576-08	PRAD
BRAF	p.V600K	Sensitive	FDA Approved	dabrafenib, RAF inhibitor	NA	NA	missense	TCGA-EE-A183-06A-11D-A196-08	SKCM
NRAS	p.G13D	Both	Case Reports	MEK inhibitors	FDA Approved	cetuximab, panitumumab	missense	TCGA-AB-2839-03B-01W-0728-08	LAML
BRCA2	p.D946fs	Sensitive	FDA Approved	PARP inhibitors	NA	NA	frame_shift_del_unspecified	TCGA-CD-A4MG-01A-11D-A25D-08	STAD
PIK3CA	p.E542K	Sensitive	Case Reports	mTOR inhibitors	NA	NA	missense	TCGA-E2-A14U-01A-11D-A228-09	BRCA
BRAF	p.V600E	Both	FDA Approved	vemurafenib, dabrafenib, trametinib, dabrafenib + trametinib	Clinical Trials	cetuximab, panitumumab	missense	TCGA-EL-A4JZ-01A-11D-A257-08	THCA
PIK3CA	p.E542K	Sensitive	Case Reports	mTOR inhibitors	NA	NA	missense	TCGA-B7-5818-01A-11D-1600-08	STAD
ERBB2	p.S310F	Sensitive	Case Reports	ERBB2 TKIs, trastuzumab	NA	NA	missense	TCGA-BR-8588-01A-11D-2394-08	STAD
BRAF	p.V600E	Both	FDA Approved	vemurafenib, dabrafenib, trametinib, dabrafenib + trametinib	Clinical Trials	cetuximab, panitumumab	missense	TCGA-EM-A3O3-01A-11D-A21Z-08	THCA
BRAF	p.V600E	Both	FDA Approved	vemurafenib, dabrafenib, trametinib, dabrafenib + trametinib	Clinical Trials	cetuximab, panitumumab	missense	TCGA-EL-A3MX-01A-11D-A21A-08	THCA
PIK3CA	p.H1047R	Sensitive	Clinical Trials	PI3K/AKT/mTOR inhibitors	NA	NA	missense	TCGA-AN-A0FF-01A-11W-A050-09	BRCA
BRCA2	p.Q2749*	Sensitive	FDA Approved	PARP inhibitors	NA	NA	nonsense	TCGA-T2-A6X2-01A-12D-A34J-08	HNSC
NRAS	p.Q61L	Both	Clinical Trials	MEK inhibitors	FDA Approved	cetuximab, panitumumab	missense	TCGA-D3-A2J8-06A-11D-A196-08	SKCM
BRAF	p.V600E	Both	FDA Approved	vemurafenib, dabrafenib, trametinib, dabrafenib + trametinib	Clinical Trials	cetuximab, panitumumab	missense	TCGA-FY-A3NN-01A-11D-A21A-08	THCA
BRAF	p.V600E	Both	FDA Approved	vemurafenib, dabrafenib, trametinib, dabrafenib + trametinib	Clinical Trials	cetuximab, panitumumab	missense	TCGA-BF-A1PX-01A-12D-A19A-08	SKCM
BRAF	p.L597Q	Sensitive	Preclinical	trametinib, MEK inhibitors	NA	NA	missense	TCGA-EE-A2A0-06A-11D-A196-08	SKCM
KRAS	p.G12C	Both	Clinical Trials	MEK inhibitors	FDA Approved	panitumumab	missense	TCGA-78-7167-01A-11D-2063-08	LUAD
KRAS	p.G12V	Both	Clinical Trials	MEK inhibitors	FDA Approved	panitumumab	missense	TCGA-78-7167-01A-11D-2063-08	LUAD
PIK3CA	p.E545K	Sensitive	Case Reports	mTOR inhibitors	NA	NA	missense	TCGA-A2-A0YC-01A-11D-A117-09	BRCA
KRAS	p.G12D	Both	Clinical Trials	MEK inhibitors	FDA Approved	panitumumab	missense	TCGA-44-6776-01A-11D-1855-08	LUAD
PIK3CA	p.E545K	Sensitive	Case Reports	mTOR inhibitors	NA	NA	missense	TCGA-21-1071-01A-01D-1521-08	LUSC
KRAS	p.A146T	Both	Case Reports	MEK inhibitors + PI3K pathway inhibitors	Clinical Trials	cetuximab, panitumumab	missense	TCGA-CM-4746	COADREAD
PIK3CA	p.H1047R	Sensitive	Clinical Trials	PI3K/AKT/mTOR inhibitors	NA	NA	missense	TCGA-BH-A0BO-01A-23D-A12B-09	BRCA
PIK3CA	p.E545K	Sensitive	Case Reports	mTOR inhibitors	NA	NA	missense	TCGA-DK-A3X1-01A-12D-A22Z-08	BLCA
EGFR	p.L858R	Sensitive	FDA Approved	erlotinib, afatinib	NA	NA	missense	TCGA-55-8096-01A-11D-2238-08	LUAD
PIK3CA	p.E542K	Sensitive	Case Reports	mTOR inhibitors	NA	NA	missense	TCGA-C8-A12T-01A-11D-A10Y-09	BRCA
GNAS	p.R201C	Sensitive	Case Reports	JAK inhibitors	NA	NA	missense	TCGA-OR-A5KV-01A-11D-A29I-10	ACC
BRAF	p.V600E	Both	FDA Approved	vemurafenib, dabrafenib, trametinib, dabrafenib + trametinib	Clinical Trials	cetuximab, panitumumab	missense	TCGA-EB-A44N-01A-11D-A25O-08	SKCM
BRAF	p.V600E	Both	FDA Approved	vemurafenib, dabrafenib, trametinib, dabrafenib + trametinib	Clinical Trials	cetuximab, panitumumab	missense	TCGA-DA-A1HY-06A-11D-A19A-08	SKCM
BRAF	p.D594G	Sensitive	Case Reports	sorafenib	NA	NA	missense	TCGA-OR-A5JB-01A-11D-A29I-10	ACC
NRAS	p.Q61R	Both	Clinical Trials	MEK inhibitors	FDA Approved	cetuximab, panitumumab	missense	TCGA-EM-A2CR-01A-11D-A17V-08	THCA
BRAF	p.V600E	Both	FDA Approved	vemurafenib, dabrafenib, trametinib, dabrafenib + trametinib	Clinical Trials	cetuximab, panitumumab	missense	TCGA-EM-A3AR-01A-12D-A20C-08	THCA
IDH2	p.R140Q	Sensitive	Clinical Trials	IDH2 inhibitor	NA	NA	missense	TCGA-AB-2936-03A-01W-0745-08	LAML
PIK3CA	p.E545K	Sensitive	Case Reports	mTOR inhibitors	NA	NA	missense	TCGA-HL-7533-01A-11D-2229-08	HNSC
BRAF	p.V600E	Both	FDA Approved	vemurafenib, dabrafenib, trametinib, dabrafenib + trametinib	Clinical Trials	cetuximab, panitumumab	missense	TCGA-E8-A437-01A-12D-A23U-08	THCA
IDH1	p.R132H	Sensitive	Case Reports	IDH1 inhibitor	NA	NA	missense	TCGA-HT-8010-01A-11D-2395-08	LGG
BRAF	p.V600E	Both	FDA Approved	vemurafenib, dabrafenib, trametinib, dabrafenib + trametinib	Clinical Trials	cetuximab, panitumumab	missense	TCGA-BJ-A18Z-01A-21D-A13W-08	THCA
BRAF	p.V600E	Both	FDA Approved	vemurafenib, dabrafenib, trametinib, dabrafenib + trametinib	Clinical Trials	cetuximab, panitumumab	missense	TCGA-FS-A1ZR-06A-21D-A197-08	SKCM
PIK3CA	p.H1047R	Sensitive	Clinical Trials	PI3K/AKT/mTOR inhibitors	NA	NA	missense	TCGA-A2-A0T4-01A-31D-A099-09	BRCA
ERBB2	p.V777L	Sensitive	Case Reports	lapatinib, neratinib	NA	NA	missense	TCGA-OL-A5D6-01A-21D-A27P-09	BRCA
BRAF	p.G466V	Sensitive	Case Reports	dasatinib	NA	NA	missense	TCGA-78-7537-01A-11D-2063-08	LUAD
PIK3CA	p.E542K	Sensitive	Case Reports	mTOR inhibitors	NA	NA	missense	TCGA-BB-4223-01A-01D-1434-08	HNSC
BRAF	p.V600E	Both	FDA Approved	vemurafenib, dabrafenib, trametinib, dabrafenib + trametinib	Clinical Trials	cetuximab, panitumumab	missense	TCGA-EE-A29M-06A-11D-A196-08	SKCM
PIK3CA	p.E542K	Sensitive	Case Reports	mTOR inhibitors	NA	NA	missense	TCGA-JL-A3YX-01A-11D-A22X-09	BRCA
BRCA2	p.E2599*	Sensitive	FDA Approved	PARP inhibitors	NA	NA	nonsense	TCGA-AA-3510	COADREAD
FGFR2	p.L550I	Both	Case Reports	ponatinib	Preclinical	dovitinib	missense	TCGA-AA-3510	COADREAD
NRAS	p.G12D	Both	Case Reports	MEK inhibitors	FDA Approved	cetuximab, panitumumab	missense	TCGA-G4-6315-01A-11D-1719-10	COADREAD
PIK3CA	p.E545K	Sensitive	Case Reports	mTOR inhibitors	NA	NA	missense	TCGA-CN-4741-01A-01D-1434-08	HNSC
BRCA2	p.E97*	Sensitive	FDA Approved	PARP inhibitors	NA	NA	nonsense	TCGA-CA-6717-01A-11D-1835-10	COADREAD
IDH1	p.R132H	Sensitive	Case Reports	IDH1 inhibitor	NA	NA	missense	TCGA-HT-8013-01A-11D-2395-08	LGG
PIK3CA	p.H1047R	Sensitive	Clinical Trials	PI3K/AKT/mTOR inhibitors	NA	NA	missense	TCGA-AR-A5QM-01A-11D-A27P-09	BRCA
IDH1	p.R132H	Sensitive	Case Reports	IDH1 inhibitor	NA	NA	missense	TCGA-06-0128-01A-01D-1490-08	GBM
BRCA1	p.K1113*	Sensitive	FDA Approved	PARP inhibitors	NA	NA	nonsense	TCGA-46-3769-01A-01D-0983-08	LUSC
KIT	p.E490D	Both	FDA Approved	imatinib, sunitinib, regorafenib	Clinical Trials	imatinib (low dose)	missense	TCGA-46-3769-01A-01D-0983-08	LUSC
KIT	p.K826N	Both	Preclinical	sorafenib	Clinical Trials	imatinib	missense	TCGA-46-3769-01A-01D-0983-08	LUSC
IDH1	p.R132H	Sensitive	Case Reports	IDH1 inhibitor	NA	NA	missense	TCGA-AB-2969-03A-01D-0739-09	LAML
FLT3	p.D835H	Both	Preclinical	lestaurtinib	Case Reports	sorafenib	missense	TCGA-AB-2969-03A-01D-0739-09	LAML
EGFR	p.L858R	Sensitive	FDA Approved	erlotinib, afatinib	NA	NA	missense	TCGA-49-4490-01A-21D-1855-08	LUAD
EGFR	p.L861Q	Sensitive	FDA Approved	erlotinib, afatinib	NA	NA	missense	TCGA-93-A4JP-01A-11D-A24P-08	LUAD
FLT3	p.D835E	Both	Preclinical	lestaurtinib	Case Reports	sorafenib	missense	TCGA-AB-2834-03B-01W-0728-08	LAML
PIK3CA	p.H1047R	Sensitive	Clinical Trials	PI3K/AKT/mTOR inhibitors	NA	NA	missense	TCGA-A7-A425-01A-11D-A243-09	BRCA
PIK3CA	p.H1047R	Sensitive	Clinical Trials	PI3K/AKT/mTOR inhibitors	NA	NA	missense	TCGA-BH-A18F-01A-11D-A12B-09	BRCA
PIK3CA	p.E542K	Sensitive	Case Reports	mTOR inhibitors	NA	NA	missense	TCGA-55-8092-01A-11D-2238-08	LUAD
BRAF	p.G469A	Both	Case Reports	EGFR TKIs + MEK inhibitors in EGFR mutant	Case Reports	EGFR TKIs	missense	TCGA-55-8092-01A-11D-2238-08	LUAD
IDH1	p.R132H	Sensitive	Case Reports	IDH1 inhibitor	NA	NA	missense	TCGA-HT-7608-01A-11D-2086-08	LGG
KRAS	p.G12D	Both	Clinical Trials	MEK inhibitors	FDA Approved	panitumumab	missense	TCGA-BS-A0U8-01A-11D-A10B-09	UCEC
BRAF	p.V600E	Both	FDA Approved	vemurafenib, dabrafenib, trametinib, dabrafenib + trametinib	Clinical Trials	cetuximab, panitumumab	missense	TCGA-D3-A51N-06A-11D-A25O-08	SKCM
KRAS	p.G12C	Both	Clinical Trials	MEK inhibitors	FDA Approved	panitumumab	missense	TCGA-55-8299-01A-11D-2284-08	LUAD
KRAS	p.G12S	Both	Clinical Trials	MEK inhibitors	FDA Approved	panitumumab	missense	TCGA-DC-6155-01A-11D-1657-10	COADREAD
KRAS	p.G13D	Both	Clinical Trials	cetuximab	FDA Approved	panitumumab	missense	TCGA-75-6206-01A-11D-1753-08	LUAD
NRAS	p.Q61H	Both	Clinical Trials	MEK inhibitors	FDA Approved	cetuximab, panitumumab	missense	TCGA-FS-A1Z3-06A-11D-A197-08	SKCM
EGFR	p.P753S	Sensitive	Preclinical	cetuximab + sirolimus	NA	NA	missense	TCGA-GF-A6C9-06A-11D-A30X-08	SKCM
BRAF	p.V600K	Sensitive	FDA Approved	dabrafenib, RAF inhibitor	NA	NA	missense	TCGA-GF-A6C9-06A-11D-A30X-08	SKCM
NOTCH2	p.R2047W	Sensitive	Case Reports	Gamma secretase inhibitors	NA	NA	missense	TCGA-GF-A6C9-06A-11D-A30X-08	SKCM
KRAS	p.G12V	Both	Clinical Trials	MEK inhibitors	FDA Approved	panitumumab	missense	TCGA-D5-6539-01A-11D-1719-10	COADREAD
BRAF	p.V600E	Both	FDA Approved	vemurafenib, dabrafenib, trametinib, dabrafenib + trametinib	Clinical Trials	cetuximab, panitumumab	missense	TCGA-CM-5861-01A-01D-1650-10	COADREAD
KRAS	p.G12V	Both	Clinical Trials	MEK inhibitors	FDA Approved	panitumumab	missense	TCGA-AB-2861-03B-01W-0728-08	LAML
PIK3CA	p.H1047R	Sensitive	Clinical Trials	PI3K/AKT/mTOR inhibitors	NA	NA	missense	TCGA-B5-A0JT-01A-21D-A122-09	UCEC
FGFR2	p.S252W	Sensitive	Case Reports	FGFR inhibitors	NA	NA	missense	TCGA-B5-A0JT-01A-21D-A122-09	UCEC
KRAS	p.G12A	Both	Clinical Trials	MEK inhibitors	FDA Approved	panitumumab	missense	TCGA-AP-A0LE-01A-11D-A127-09	UCEC
EGFR	p.G719D	Sensitive	FDA Approved	erlotinib, afatinib	NA	NA	missense	TCGA-06-0650-01A-02D-1696-08	GBM
PIK3CA	p.E542K	Sensitive	Case Reports	mTOR inhibitors	NA	NA	missense	TCGA-BH-A0W3-01A-11D-A10G-09	BRCA
PIK3CA	p.E542K	Sensitive	Case Reports	mTOR inhibitors	NA	NA	missense	TCGA-AY-6386-01A-21D-1719-10	COADREAD
KRAS	p.G12D	Both	Clinical Trials	MEK inhibitors	FDA Approved	panitumumab	missense	TCGA-AY-6386-01A-21D-1719-10	COADREAD
BRAF	p.V600E	Both	FDA Approved	vemurafenib, dabrafenib, trametinib, dabrafenib + trametinib	Clinical Trials	cetuximab, panitumumab	missense	TCGA-AD-5900-01A-11D-1650-10	COADREAD
BRAF	p.V600K	Sensitive	FDA Approved	dabrafenib, RAF inhibitor	NA	NA	missense	TCGA-EE-A20H-06A-11D-A197-08	SKCM
PIK3CA	p.E545K	Sensitive	Case Reports	mTOR inhibitors	NA	NA	missense	TCGA-BH-A0DV-01A-21D-A12Q-09	BRCA
BRAF	p.V600E	Both	FDA Approved	vemurafenib, dabrafenib, trametinib, dabrafenib + trametinib	Clinical Trials	cetuximab, panitumumab	missense	TCGA-DA-A1I7-06A-22D-A197-08	SKCM
KRAS	p.G12D	Both	Clinical Trials	MEK inhibitors	FDA Approved	panitumumab	missense	TCGA-CM-6674-01A-11D-1835-10	COADREAD
KRAS	p.Q61H	Both	Clinical Trials	MEK inhibitors	FDA Approved	panitumumab	missense	TCGA-BR-8366-01A-11D-2340-08	STAD
BRAF	p.V600E	Both	FDA Approved	vemurafenib, dabrafenib, trametinib, dabrafenib + trametinib	Clinical Trials	cetuximab, panitumumab	missense	TCGA-E3-A3DY-01A-11D-A20C-08	THCA
PIK3CA	p.H1047R	Sensitive	Clinical Trials	PI3K/AKT/mTOR inhibitors	NA	NA	missense	TCGA-D8-A27G-01A-11D-A16D-09	BRCA
PDGFRA	p.E556K	Sensitive	Clinical Trials	imatinib	NA	NA	missense	TCGA-D8-A27G-01A-11D-A16D-09	BRCA
BRCA2	p.S2695*	Sensitive	FDA Approved	PARP inhibitors	NA	NA	nonsense	TCGA-75-6211-01A-11D-1753-08	LUAD
FGFR2	p.N550K	Both	Case Reports	ponatinib	Preclinical	Dovitinib	missense	TCGA-B5-A0K1-01A-11W-A062-09	UCEC
FGFR2	p.N549K	Sensitive	Case Reports	FGFR inhibitors	NA	NA	missense	TCGA-B5-A0K1-01A-11W-A062-09	UCEC
PDGFRA	p.Y572C	Sensitive	Clinical Trials	imatinib	NA	NA	missense	TCGA-A6-5659-01A-01D-1650-10	COADREAD
KRAS	p.G12V	Both	Clinical Trials	MEK inhibitors	FDA Approved	panitumumab	missense	TCGA-A6-5659-01A-01D-1650-10	COADREAD
BRCA2	p.T2515fs	Sensitive	FDA Approved	PARP inhibitors	NA	NA	frame_shift_del_unspecified	TCGA-A6-5665-01A-01D-1650-10	COADREAD
BRAF	p.V600E	Both	FDA Approved	vemurafenib, dabrafenib, trametinib, dabrafenib + trametinib	Clinical Trials	cetuximab, panitumumab	missense	TCGA-A6-5665-01A-01D-1650-10	COADREAD
PIK3CA	p.H1047R	Sensitive	Clinical Trials	PI3K/AKT/mTOR inhibitors	NA	NA	missense	TCGA-MP-A4SY-01A-21D-A24P-08	LUAD
KRAS	p.G12D	Both	Clinical Trials	MEK inhibitors	FDA Approved	panitumumab	missense	TCGA-MP-A4SY-01A-21D-A24P-08	LUAD
IDH1	p.R132H	Sensitive	Case Reports	IDH1 inhibitor	NA	NA	missense	TCGA-DB-A4X9-01A-11D-A26M-08	LGG
ERBB2	p.S310F	Sensitive	Case Reports	ERBB2 TKIs, trastuzumab	NA	NA	missense	TCGA-36-2530	OV
BRAF	p.V600E	Both	FDA Approved	vemurafenib, dabrafenib, trametinib, dabrafenib + trametinib	Clinical Trials	cetuximab, panitumumab	missense	TCGA-DJ-A3VB-01A-11D-A23M-08	THCA
IDH2	p.R172K	Sensitive	Clinical Trials	IDH2 inhibitor	NA	NA	missense	TCGA-DB-A4XG-01A-11D-A27K-08	LGG
KRAS	p.G12C	Both	Clinical Trials	MEK inhibitors	FDA Approved	panitumumab	missense	TCGA-05-4417-01A-22D-1855-08	LUAD
BRAF	p.V600E	Both	FDA Approved	vemurafenib, dabrafenib, trametinib, dabrafenib + trametinib	Clinical Trials	cetuximab, panitumumab	missense	TCGA-EL-A4KH-01A-11D-A257-08	THCA
BRAF	p.V600E	Both	FDA Approved	vemurafenib, dabrafenib, trametinib, dabrafenib + trametinib	Clinical Trials	cetuximab, panitumumab	missense	TCGA-E8-A413-01A-21D-A23M-08	THCA
BRAF	p.V600E	Both	FDA Approved	vemurafenib, dabrafenib, trametinib, dabrafenib + trametinib	Clinical Trials	cetuximab, panitumumab	missense	TCGA-EL-A3GS-01A-11D-A20C-08	THCA
PIK3CA	p.E545K	Sensitive	Case Reports	mTOR inhibitors	NA	NA	missense	TCGA-BA-A4IF-01A-11D-A25Y-08	HNSC
KRAS	p.G12D	Both	Clinical Trials	MEK inhibitors	FDA Approved	panitumumab	missense	TCGA-49-6761-01A-31D-1945-08	LUAD
BRAF	p.V600E	Both	FDA Approved	vemurafenib, dabrafenib, trametinib, dabrafenib + trametinib	Clinical Trials	cetuximab, panitumumab	missense	TCGA-D3-A2JG-06A-11D-A196-08	SKCM
GNAS	p.R201H	Sensitive	Case Reports	JAK inhibitors	NA	NA	missense	TCGA-95-7567-01A-11D-2063-08	LUAD
KRAS	p.G12V	Both	Clinical Trials	MEK inhibitors	FDA Approved	panitumumab	missense	TCGA-95-7567-01A-11D-2063-08	LUAD
BRCA2	p.L19fs	Sensitive	FDA Approved	PARP inhibitors	NA	NA	frame_shift_del_unspecified	TCGA-CG-5728-01A-11D-1600-08	STAD
GNAS	p.R201C	Sensitive	Case Reports	JAK inhibitors	NA	NA	missense	TCGA-DD-A118-01A-11D-A12Z-10	LIHC
PIK3CA	p.E545K	Sensitive	Case Reports	mTOR inhibitors	NA	NA	missense	TCGA-AR-A1AL-01A-21D-A12Q-09	BRCA
KRAS	p.G12C	Both	Clinical Trials	MEK inhibitors	FDA Approved	panitumumab	missense	TCGA-AR-A1AL-01A-21D-A12Q-09	BRCA
BRAF	p.V600E	Both	FDA Approved	vemurafenib, dabrafenib, trametinib, dabrafenib + trametinib	Clinical Trials	cetuximab, panitumumab	missense	TCGA-DJ-A2Q4-01A-21D-A18F-08	THCA
KRAS	p.G12V	Both	Clinical Trials	MEK inhibitors	FDA Approved	panitumumab	missense	TCGA-17-Z010-01A-01W-0746-08	LUAD
PIK3CA	p.E545K	Sensitive	Case Reports	mTOR inhibitors	NA	NA	missense	TCGA-44-5643-01A-01D-1625-08	LUAD
EGFR	p.TSPKANKE751in_frame_del	Sensitive	FDA Approved	Afatinib	NA	NA	in_frame_del	TCGA-05-4402-01A-01D-1265-08	LUAD
PIK3CA	p.E545K	Sensitive	Case Reports	mTOR inhibitors	NA	NA	missense	TCGA-MZ-A6I9-01A-11D-A31L-08	HNSC
BRAF	p.V600E	Both	FDA Approved	vemurafenib, dabrafenib, trametinib, dabrafenib + trametinib	Clinical Trials	cetuximab, panitumumab	missense	TCGA-EE-A17Y-06A-11D-A196-08	SKCM
BRAF	p.V600E	Both	FDA Approved	vemurafenib, dabrafenib, trametinib, dabrafenib + trametinib	Clinical Trials	cetuximab, panitumumab	missense	TCGA-DJ-A2PS-01A-11D-A18F-08	THCA
PIK3CA	p.E545K	Sensitive	Case Reports	mTOR inhibitors	NA	NA	missense	TCGA-EO-A1Y8-01A-11D-A159-09	UCEC
FGFR2	p.N550K	Both	Case Reports	ponatinib	Preclinical	Dovitinib	missense	TCGA-EO-A1Y8-01A-11D-A159-09	UCEC
FGFR2	p.N549K	Sensitive	Case Reports	FGFR inhibitors	NA	NA	missense	TCGA-EO-A1Y8-01A-11D-A159-09	UCEC
PIK3CA	p.E542K	Sensitive	Case Reports	mTOR inhibitors	NA	NA	missense	TCGA-AO-A12A-01A-21D-A10Y-09	BRCA
BRAF	p.V600E	Both	FDA Approved	vemurafenib, dabrafenib, trametinib, dabrafenib + trametinib	Clinical Trials	cetuximab, panitumumab	missense	TCGA-G4-6302-01A-11D-1719-10	COADREAD
BRAF	p.V600E	Both	FDA Approved	vemurafenib, dabrafenib, trametinib, dabrafenib + trametinib	Clinical Trials	cetuximab, panitumumab	missense	TCGA-ET-A2N4-01A-12D-A19J-08	THCA
PIK3CA	p.H1047R	Sensitive	Clinical Trials	PI3K/AKT/mTOR inhibitors	NA	NA	missense	TCGA-BH-A0BA-01A-11W-A071-09	BRCA
BRAF	p.V600E	Both	FDA Approved	vemurafenib, dabrafenib, trametinib, dabrafenib + trametinib	Clinical Trials	cetuximab, panitumumab	missense	TCGA-FE-A230-01A-11D-A14W-08	THCA
AKT1	p.E17K	Sensitive	Clinical Trials	AKT inhibitors	NA	NA	missense	TCGA-E8-A418-01A-11D-A23M-08	THCA
BRAF	p.V600E	Both	FDA Approved	vemurafenib, dabrafenib, trametinib, dabrafenib + trametinib	Clinical Trials	cetuximab, panitumumab	missense	TCGA-E8-A418-01A-11D-A23M-08	THCA
IDH1	p.R132H	Sensitive	Case Reports	IDH1 inhibitor	NA	NA	missense	TCGA-06-0129-01A-01D-1490-08	GBM
ERBB2	p.S310F	Sensitive	Case Reports	ERBB2 TKIs, trastuzumab	NA	NA	missense	TCGA-C5-A1MJ-01A-11D-A14W-08	CESC
BRAF	p.V600E	Both	FDA Approved	vemurafenib, dabrafenib, trametinib, dabrafenib + trametinib	Clinical Trials	cetuximab, panitumumab	missense	TCGA-DJ-A2Q7-01A-11D-A18F-08	THCA
NOTCH1	p.Q1694R	Sensitive	Clinical Trials	steroids early setting	NA	NA	missense	TCGA-62-A46R-01A-11D-A24D-08	LUAD
KRAS	p.G12A	Both	Clinical Trials	MEK inhibitors	FDA Approved	panitumumab	missense	TCGA-62-A46R-01A-11D-A24D-08	LUAD
IDH1	p.R132H	Sensitive	Case Reports	IDH1 inhibitor	NA	NA	missense	TCGA-DU-5874-01A-11D-1705-08	LGG
IDH1	p.R132H	Sensitive	Case Reports	IDH1 inhibitor	NA	NA	missense	TCGA-HT-7481-01A-11D-2024-08	LGG
PIK3CA	p.E542K	Sensitive	Case Reports	mTOR inhibitors	NA	NA	missense	TCGA-MY-A5BD-01A-11D-A26G-09	CESC
IDH2	p.R140Q	Sensitive	Clinical Trials	IDH2 inhibitor	NA	NA	missense	TCGA-AB-2966-03A-01D-0739-09	LAML
KRAS	p.A146T	Both	Case Reports	MEK inhibitors + PI3K pathway inhibitors	Clinical Trials	cetuximab, panitumumab	missense	TCGA-AB-2966-03A-01D-0739-09	LAML
AKT1	p.E17K	Sensitive	Clinical Trials	AKT inhibitors	NA	NA	missense	TCGA-AD-6889-01A-11D-1924-10	COADREAD
BRAF	p.V600E	Both	FDA Approved	vemurafenib, dabrafenib, trametinib, dabrafenib + trametinib	Clinical Trials	cetuximab, panitumumab	missense	TCGA-AD-6889-01A-11D-1924-10	COADREAD
IDH1	p.R132H	Sensitive	Case Reports	IDH1 inhibitor	NA	NA	missense	TCGA-DU-7010-01A-11D-2024-08	LGG
IDH1	p.R132H	Sensitive	Case Reports	IDH1 inhibitor	NA	NA	missense	TCGA-DU-5855-01A-11D-1705-08	LGG
IDH1	p.R132H	Sensitive	Case Reports	IDH1 inhibitor	NA	NA	missense	TCGA-DU-7015-01A-11D-2024-08	LGG
PIK3CA	p.H1047R	Sensitive	Clinical Trials	PI3K/AKT/mTOR inhibitors	NA	NA	missense	TCGA-AO-A0J5-01A-11W-A050-09	BRCA
ERBB2	p.774in_frame_insAYVM	Sensitive	Clinical Trials	trastuzumab	NA	NA	in_frame_ins	TCGA-05-5715-01A-01D-1625-08	LUAD
IDH2	p.R172K	Sensitive	Clinical Trials	IDH2 inhibitor	NA	NA	missense	TCGA-HW-7491-01A-11D-2024-08	LGG
NRAS	p.Q61R	Both	Clinical Trials	MEK inhibitors	FDA Approved	cetuximab, panitumumab	missense	TCGA-EE-A3JA-06A-11D-A20D-08	SKCM
PIK3CA	p.H1047R	Sensitive	Clinical Trials	PI3K/AKT/mTOR inhibitors	NA	NA	missense	TCGA-E2-A14Y-01A-21D-A12B-09	BRCA
PIK3CA	p.H1047R	Sensitive	Clinical Trials	PI3K/AKT/mTOR inhibitors	NA	NA	missense	TCGA-AC-A3TN-01A-11D-A228-09	BRCA
KRAS	p.G12D	Both	Clinical Trials	MEK inhibitors	FDA Approved	panitumumab	missense	TCGA-CI-6620-01A-11D-1826-10	COADREAD
KRAS	p.G12C	Both	Clinical Trials	MEK inhibitors	FDA Approved	panitumumab	missense	TCGA-DM-A1HA-01A-11D-A152-10	COADREAD
BRAF	p.G469A	Both	Case Reports	EGFR TKIs + MEK inhibitors in EGFR mutant	Case Reports	EGFR TKIs	missense	TCGA-EJ-A65E-01A-11D-A29Q-08	PRAD
BRAF	p.V600E	Both	FDA Approved	vemurafenib, dabrafenib, trametinib, dabrafenib + trametinib	Clinical Trials	cetuximab, panitumumab	missense	TCGA-FY-A3R7-01A-11D-A21Z-08	THCA
EGFR	p.G598V	Sensitive	Case Reports	erlotinib	NA	NA	missense	TCGA-FG-A4MU-01B-11D-A289-08	LGG
PIK3CA	p.H1047R	Sensitive	Clinical Trials	PI3K/AKT/mTOR inhibitors	NA	NA	missense	TCGA-AX-A05T-01A-11W-A027-09	UCEC
BRAF	p.V600E	Both	FDA Approved	vemurafenib, dabrafenib, trametinib, dabrafenib + trametinib	Clinical Trials	cetuximab, panitumumab	missense	TCGA-DJ-A2PV-01A-11D-A19J-08	THCA
FLT3	p.D835Y	Both	Preclinical	lestaurtinib	Case Reports	sorafenib	missense	TCGA-AB-2974-03A-01D-0739-09	LAML
PIK3CA	p.H1047R	Sensitive	Clinical Trials	PI3K/AKT/mTOR inhibitors	NA	NA	missense	TCGA-A2-A0CP-01A-11W-A050-09	BRCA
BRAF	p.V600E	Both	FDA Approved	vemurafenib, dabrafenib, trametinib, dabrafenib + trametinib	Clinical Trials	cetuximab, panitumumab	missense	TCGA-DJ-A3V7-01A-11D-A23M-08	THCA
BRCA1	p.*193L	Sensitive	FDA Approved	PARP inhibitors	NA	NA	nonsense	TCGA-18-5592-01A-01D-1632-08	LUSC
PIK3CA	p.H1047R	Sensitive	Clinical Trials	PI3K/AKT/mTOR inhibitors	NA	NA	missense	TCGA-C8-A274-01A-11D-A16D-09	BRCA
PIK3CA	p.H1047R	Sensitive	Clinical Trials	PI3K/AKT/mTOR inhibitors	NA	NA	missense	TCGA-LL-A5YN-01A-11D-A28B-09	BRCA
PIK3CA	p.H1047R	Sensitive	Clinical Trials	PI3K/AKT/mTOR inhibitors	NA	NA	missense	TCGA-C8-A130-01A-31D-A10Y-09	BRCA
BRAF	p.V600E	Both	FDA Approved	vemurafenib, dabrafenib, trametinib, dabrafenib + trametinib	Clinical Trials	cetuximab, panitumumab	missense	TCGA-EB-A44P-01A-11D-A25O-08	SKCM
GNAQ	p.Q209P	Sensitive	Clinical Trials	selumetinib	NA	NA	missense	TCGA-ER-A2NF-01A-11D-A19A-08	SKCM
BRCA1	p.K443fs	Sensitive	FDA Approved	PARP inhibitors	NA	NA	frame_shift_del_unspecified	TCGA-F4-6570-01A-11D-1771-10	COADREAD
PDGFRA	p.R558H	Sensitive	Clinical Trials	imatinib	NA	NA	missense	TCGA-F4-6570-01A-11D-1771-10	COADREAD
BRAF	p.V600E	Both	FDA Approved	vemurafenib, dabrafenib, trametinib, dabrafenib + trametinib	Clinical Trials	cetuximab, panitumumab	missense	TCGA-F4-6570-01A-11D-1771-10	COADREAD
IDH1	p.R132H	Sensitive	Case Reports	IDH1 inhibitor	NA	NA	missense	TCGA-HT-7616-01A-11D-2253-08	LGG
EGFR	p.ELREA746in_frame_del	Sensitive	FDA Approved	erlotinib, afatinib	NA	NA	in_frame_del	TCGA-62-A46U-01A-11D-A24D-08	LUAD
BRAF	p.V600E	Both	FDA Approved	vemurafenib, dabrafenib, trametinib, dabrafenib + trametinib	Clinical Trials	cetuximab, panitumumab	missense	TCGA-ET-A25G-01A-11D-A16O-08	THCA
KIT	p.D816Y	Both	Preclinical	sorafenib	Clinical Trials	imatinib	missense	TCGA-AB-2881-03A-01W-0732-08	LAML
PIK3CA	p.H1047R	Sensitive	Clinical Trials	PI3K/AKT/mTOR inhibitors	NA	NA	missense	TCGA-LQ-A4E4-01A-11D-A25Q-09	BRCA
PIK3CA	p.E545K	Sensitive	Case Reports	mTOR inhibitors	NA	NA	missense	TCGA-AP-A0LV-01A-11W-A062-09	UCEC
BRAF	p.V600E	Both	FDA Approved	vemurafenib, dabrafenib, trametinib, dabrafenib + trametinib	Clinical Trials	cetuximab, panitumumab	missense	TCGA-GF-A2C7-01A-11D-A197-08	SKCM
IDH1	p.R132H	Sensitive	Case Reports	IDH1 inhibitor	NA	NA	missense	TCGA-E1-5303-01A-01D-1468-08	LGG
PIK3CA	p.E542K	Sensitive	Case Reports	mTOR inhibitors	NA	NA	missense	TCGA-BH-A18I-01A-11D-A12B-09	BRCA
KRAS	p.G12R	Both	Clinical Trials	MEK inhibitors	FDA Approved	panitumumab	missense	TCGA-D5-6537-01A-11D-1719-10	COADREAD
IDH1	p.R132H	Sensitive	Case Reports	IDH1 inhibitor	NA	NA	missense	TCGA-DU-6410-01A-11D-1893-08	LGG
EGFR	p.A289V	Sensitive	Case Reports	erlotinib	NA	NA	missense	TCGA-DU-6410-01A-11D-1893-08	LGG
PIK3CA	p.E542K	Sensitive	Case Reports	mTOR inhibitors	NA	NA	missense	TCGA-CM-6678-01A-11D-1835-10	COADREAD
KRAS	p.G12D	Both	Clinical Trials	MEK inhibitors	FDA Approved	panitumumab	missense	TCGA-CM-6678-01A-11D-1835-10	COADREAD
KRAS	p.G12D	Both	Clinical Trials	MEK inhibitors	FDA Approved	panitumumab	missense	TCGA-93-A4JO-01A-21D-A24P-08	LUAD
PIK3CA	p.E545K	Sensitive	Case Reports	mTOR inhibitors	NA	NA	missense	TCGA-A8-A06R-01A-11D-A015-09	BRCA
KRAS	p.Q61H	Both	Clinical Trials	MEK inhibitors	FDA Approved	panitumumab	missense	TCGA-63-6202-01A-11D-1817-08	LUSC
KRAS	p.G12A	Both	Clinical Trials	MEK inhibitors	FDA Approved	panitumumab	missense	TCGA-AD-6901-01A-11D-1924-10	COADREAD
KRAS	p.G12V	Both	Clinical Trials	MEK inhibitors	FDA Approved	panitumumab	missense	TCGA-F4-6857-01A-11D-1924-10	COADREAD
MAP2K1	p.P124S	Both	Preclinical	BRAF inhibitors in BRAF mutant tumor	Clinical Trials	BRAF inhibitors	missense	TCGA-EE-A3JB-06A-11D-A21A-08	SKCM
BRAF	p.V600E	Both	FDA Approved	vemurafenib, dabrafenib, trametinib, dabrafenib + trametinib	Clinical Trials	cetuximab, panitumumab	missense	TCGA-EE-A3JB-06A-11D-A21A-08	SKCM
PIK3CA	p.E542K	Sensitive	Case Reports	mTOR inhibitors	NA	NA	missense	TCGA-BK-A0CB-01A-32D-A10B-09	UCEC
PIK3CA	p.H1047R	Sensitive	Clinical Trials	PI3K/AKT/mTOR inhibitors	NA	NA	missense	TCGA-A7-A0DB	BRCA
BRAF	p.V600E	Both	FDA Approved	vemurafenib, dabrafenib, trametinib, dabrafenib + trametinib	Clinical Trials	cetuximab, panitumumab	missense	TCGA-EL-A3GX-01A-11D-A202-08	THCA
KRAS	p.G12V	Both	Clinical Trials	MEK inhibitors	FDA Approved	panitumumab	missense	TCGA-D5-5540-01A-01D-1650-10	COADREAD
BRAF	p.V600E	Both	FDA Approved	vemurafenib, dabrafenib, trametinib, dabrafenib + trametinib	Clinical Trials	cetuximab, panitumumab	missense	TCGA-EE-A20F-06A-21D-A196-08	SKCM
GNAS	p.R201C	Sensitive	Case Reports	JAK inhibitors	NA	NA	missense	TCGA-FV-A3R3-01A-11D-A22F-10	LIHC
IDH1	p.R132H	Sensitive	Case Reports	IDH1 inhibitor	NA	NA	missense	TCGA-HW-A5KM-01A-11D-A27K-08	LGG
KRAS	p.G12V	Both	Clinical Trials	MEK inhibitors	FDA Approved	panitumumab	missense	TCGA-95-A4VK-01A-11D-A25L-08	LUAD
BRAF	p.V600E	Both	FDA Approved	vemurafenib, dabrafenib, trametinib, dabrafenib + trametinib	Clinical Trials	cetuximab, panitumumab	missense	TCGA-BJ-A45J-01A-11D-A23U-08	THCA
EGFR	p.T263P	Sensitive	Case Reports	erlotinib	NA	NA	missense	TCGA-HT-A61C-01A-11D-A29Q-08	LGG
KRAS	p.G12D	Both	Clinical Trials	MEK inhibitors	FDA Approved	panitumumab	missense	TCGA-EK-A2RL-01A-11D-A18J-09	CESC
BRCA2	p.S1064*	Sensitive	FDA Approved	PARP inhibitors	NA	NA	nonsense	TCGA-BS-A0UF-01A-11D-A10B-09	UCEC
MTOR	p.S2215Y	Sensitive	Case Reports	rapamycin	NA	NA	missense	TCGA-BS-A0UF-01A-11D-A10B-09	UCEC
RET	p.S891L	Sensitive	FDA Approved	vandetanib	NA	NA	missense	TCGA-BS-A0UF-01A-11D-A10B-09	UCEC
KIT	p.L679F	Sensitive	Clinical Trials	sunitinib	NA	NA	missense	TCGA-BS-A0UF-01A-11D-A10B-09	UCEC
PIK3CA	p.E545K	Sensitive	Case Reports	mTOR inhibitors	NA	NA	missense	TCGA-BC-A112-01A-11D-A12Z-10	LIHC
EGFR	p.A289V	Sensitive	Case Reports	erlotinib	NA	NA	missense	TCGA-06-5856-01A-01D-1696-08	GBM
PIK3CA	p.H1047R	Sensitive	Clinical Trials	PI3K/AKT/mTOR inhibitors	NA	NA	missense	TCGA-CD-A4MI-01A-21D-A25D-08	STAD
NOTCH2	p.Q2223R	Sensitive	Case Reports	Gamma secretase inhibitors	NA	NA	missense	TCGA-CG-5721-01A-11D-1600-08	STAD
BRAF	p.V600E	Both	FDA Approved	vemurafenib, dabrafenib, trametinib, dabrafenib + trametinib	Clinical Trials	cetuximab, panitumumab	missense	TCGA-EE-A29P-06A-11D-A197-08	SKCM
IDH1	p.R132H	Sensitive	Case Reports	IDH1 inhibitor	NA	NA	missense	TCGA-QH-A65V-01A-11D-A29Q-08	LGG
PIK3CA	p.E542K	Sensitive	Case Reports	mTOR inhibitors	NA	NA	missense	TCGA-DU-7018-01A-11D-2024-08	LGG
IDH1	p.R132H	Sensitive	Case Reports	IDH1 inhibitor	NA	NA	missense	TCGA-DU-7018-01A-11D-2024-08	LGG
PIK3CA	p.E545K	Sensitive	Case Reports	mTOR inhibitors	NA	NA	missense	TCGA-BH-A0DX-01A-11D-A10Y-09	BRCA
KRAS	p.G12C	Both	Clinical Trials	MEK inhibitors	FDA Approved	panitumumab	missense	TCGA-44-7659-01A-11D-2063-08	LUAD
BRAF	p.V600E	Both	FDA Approved	vemurafenib, dabrafenib, trametinib, dabrafenib + trametinib	Clinical Trials	cetuximab, panitumumab	missense	TCGA-DJ-A13X-01A-11D-A10S-08	THCA
PIK3CA	p.H1047R	Sensitive	Clinical Trials	PI3K/AKT/mTOR inhibitors	NA	NA	missense	TCGA-A8-A09D-01A-11W-A019-09	BRCA
PIK3CA	p.E545K	Sensitive	Case Reports	mTOR inhibitors	NA	NA	missense	TCGA-GF-A3OT-06A-23D-A23B-08	SKCM
NRAS	p.Q61K	Both	Clinical Trials	MEK inhibitors	FDA Approved	cetuximab, panitumumab	missense	TCGA-GF-A3OT-06A-23D-A23B-08	SKCM
PIK3CA	p.E545K	Sensitive	Case Reports	mTOR inhibitors	NA	NA	missense	TCGA-EK-A2PM-01A-11D-A18J-09	CESC
BRAF	p.V600E	Both	FDA Approved	vemurafenib, dabrafenib, trametinib, dabrafenib + trametinib	Clinical Trials	cetuximab, panitumumab	missense	TCGA-G4-6321-01A-11D-1719-10	COADREAD
PIK3CA	p.H1047R	Sensitive	Clinical Trials	PI3K/AKT/mTOR inhibitors	NA	NA	missense	TCGA-BH-A0BT-01A-11D-A12Q-09	BRCA
PIK3CA	p.H1047R	Sensitive	Clinical Trials	PI3K/AKT/mTOR inhibitors	NA	NA	missense	TCGA-AR-A1AW-01A-21D-A12Q-09	BRCA
FGFR2	p.V565I	Both	Case Reports	selective FGFR inhibitor	Preclinical	ponatinib	missense	TCGA-EK-A2R9-01A-11D-A18J-09	CESC
KRAS	p.G12V	Both	Clinical Trials	MEK inhibitors	FDA Approved	panitumumab	missense	TCGA-EK-A2R9-01A-11D-A18J-09	CESC
PIK3CA	p.H1047R	Sensitive	Clinical Trials	PI3K/AKT/mTOR inhibitors	NA	NA	missense	TCGA-C8-A131-01A-11D-A10Y-09	BRCA
KRAS	p.G12V	Both	Clinical Trials	MEK inhibitors	FDA Approved	panitumumab	missense	TCGA-C8-A131-01A-11D-A10Y-09	BRCA
FLT3	p.D835Y	Both	Preclinical	lestaurtinib	Case Reports	sorafenib	missense	TCGA-AB-2926-03A-01W-0732-08	LAML
BRAF	p.V600E	Both	FDA Approved	vemurafenib, dabrafenib, trametinib, dabrafenib + trametinib	Clinical Trials	cetuximab, panitumumab	missense	TCGA-EL-A3CR-01A-12D-A202-08	THCA
IDH1	p.R132H	Sensitive	Case Reports	IDH1 inhibitor	NA	NA	missense	TCGA-HT-7875-01A-11D-2395-08	LGG
JAK2	p.V617F	Sensitive	FDA Approved	ruxolitinib	NA	NA	missense	TCGA-76-4928-01B-01D-1486-08	GBM
BRAF	p.V600E	Both	FDA Approved	vemurafenib, dabrafenib, trametinib, dabrafenib + trametinib	Clinical Trials	cetuximab, panitumumab	missense	TCGA-76-4928-01B-01D-1486-08	GBM
KRAS	p.G12D	Both	Clinical Trials	MEK inhibitors	FDA Approved	panitumumab	missense	TCGA-CK-4948-01B-11D-1650-10	COADREAD
ERBB2	p.774in_frame_insAYVM	Sensitive	Clinical Trials	trastuzumab	NA	NA	in_frame_ins	TCGA-44-3919	LUAD
BRCA2	p.S3376*	Sensitive	FDA Approved	PARP inhibitors	NA	NA	nonsense	TCGA-44-3919	LUAD
KRAS	p.G12V	Both	Clinical Trials	MEK inhibitors	FDA Approved	panitumumab	missense	TCGA-38-4626-01A-01D-1553-08	LUAD
PIK3CA	p.E542K	Sensitive	Case Reports	mTOR inhibitors	NA	NA	missense	TCGA-AA-3663-01A-01D-1719-10	COADREAD
KRAS	p.G13D	Both	Clinical Trials	cetuximab	FDA Approved	panitumumab	missense	TCGA-AA-3663-01A-01D-1719-10	COADREAD
IDH2	p.R140Q	Sensitive	Clinical Trials	IDH2 inhibitor	NA	NA	missense	TCGA-AB-2874-03A-01W-0732-08	LAML
NOTCH2	p.S220N	Sensitive	Case Reports	Gamma secretase inhibitors	NA	NA	missense	TCGA-BR-A4QL-01A-31D-A25D-08	STAD
KRAS	p.G13D	Both	Clinical Trials	cetuximab	FDA Approved	panitumumab	missense	TCGA-BR-A4QL-01A-31D-A25D-08	STAD
KRAS	p.G12V	Both	Clinical Trials	MEK inhibitors	FDA Approved	panitumumab	missense	TCGA-44-6145-01A-11D-1753-08	LUAD
IDH1	p.R132H	Sensitive	Case Reports	IDH1 inhibitor	NA	NA	missense	TCGA-DB-A64X-01A-11D-A29Q-08	LGG
KRAS	p.G12A	Both	Clinical Trials	MEK inhibitors	FDA Approved	panitumumab	missense	TCGA-44-7672-01A-11D-2063-08	LUAD
PIK3CA	p.H1047R	Sensitive	Clinical Trials	PI3K/AKT/mTOR inhibitors	NA	NA	missense	TCGA-G3-A7M8-01A-11D-A33Q-10	LIHC
KRAS	p.G12D	Both	Clinical Trials	MEK inhibitors	FDA Approved	panitumumab	missense	TCGA-75-7030-01A-11D-1945-08	LUAD
IDH1	p.R132H	Sensitive	Case Reports	IDH1 inhibitor	NA	NA	missense	TCGA-DU-8164-01A-11D-2253-08	LGG
NRAS	p.Q61L	Both	Clinical Trials	MEK inhibitors	FDA Approved	cetuximab, panitumumab	missense	TCGA-EE-A29Q-06A-11D-A197-08	SKCM
PIK3CA	p.H1047R	Sensitive	Clinical Trials	PI3K/AKT/mTOR inhibitors	NA	NA	missense	TCGA-PE-A5DD-01A-12D-A27P-09	BRCA
KRAS	p.G13C	Both	Clinical Trials	MEK inhibitors	FDA Approved	panitumumab	missense	TCGA-99-8025-01A-11D-2238-08	LUAD
PIK3CA	p.E542K	Sensitive	Case Reports	mTOR inhibitors	NA	NA	missense	TCGA-H4-A2HO-01A-11D-A17V-08	BLCA
KRAS	p.G12C	Both	Clinical Trials	MEK inhibitors	FDA Approved	panitumumab	missense	TCGA-55-6983-01A-11D-1945-08	LUAD
BRAF	p.V600E	Both	FDA Approved	vemurafenib, dabrafenib, trametinib, dabrafenib + trametinib	Clinical Trials	cetuximab, panitumumab	missense	TCGA-AL-3467-01A-01D-1252-08	KIRP
PIK3CA	p.E545K	Sensitive	Case Reports	mTOR inhibitors	NA	NA	missense	TCGA-CG-4305-01A-01D-1158-08	STAD
PIK3CA	p.E542K	Sensitive	Case Reports	mTOR inhibitors	NA	NA	missense	TCGA-UF-A71B-01A-12D-A34J-08	HNSC
BRAF	p.V600E	Both	FDA Approved	vemurafenib, dabrafenib, trametinib, dabrafenib + trametinib	Clinical Trials	cetuximab, panitumumab	missense	TCGA-FS-A4FB-06A-11D-A25O-08	SKCM
BRCA1	p.G187*	Sensitive	FDA Approved	PARP inhibitors	NA	NA	nonsense	TCGA-97-7554-01A-11D-2036-08	LUAD
KRAS	p.G12V	Both	Clinical Trials	MEK inhibitors	FDA Approved	panitumumab	missense	TCGA-97-7554-01A-11D-2036-08	LUAD
IDH1	p.R132H	Sensitive	Case Reports	IDH1 inhibitor	NA	NA	missense	TCGA-P5-A5EU-01A-11D-A27K-08	LGG
NRAS	p.G12C	Both	Case Reports	ERK inhibitors	FDA Approved	cetuximab, panitumumab	missense	TCGA-AF-2691-01A-01W-0831-10	COADREAD
NRAS	p.Q61L	Both	Clinical Trials	MEK inhibitors	FDA Approved	cetuximab, panitumumab	missense	TCGA-EB-A44Q-06A-11D-A25O-08	SKCM
BRAF	p.V600E	Both	FDA Approved	vemurafenib, dabrafenib, trametinib, dabrafenib + trametinib	Clinical Trials	cetuximab, panitumumab	missense	TCGA-86-7714-01A-12D-2167-08	LUAD
NRAS	p.Q61R	Both	Clinical Trials	MEK inhibitors	FDA Approved	cetuximab, panitumumab	missense	TCGA-EL-A3GW-01A-11D-A202-08	THCA
PIK3CA	p.E545K	Sensitive	Case Reports	mTOR inhibitors	NA	NA	missense	TCGA-A2-A0EX-01A-21W-A050-09	BRCA
SF3B1	p.K700E	Sensitive	Case Reports	spliceosome inhibitor	NA	NA	missense	TCGA-AR-A1AM-01A-41D-A228-09	BRCA
IDH1	p.R132H	Sensitive	Case Reports	IDH1 inhibitor	NA	NA	missense	TCGA-HT-7880-01A-11D-2395-08	LGG
PIK3CA	p.H1047R	Sensitive	Clinical Trials	PI3K/AKT/mTOR inhibitors	NA	NA	missense	TCGA-E2-A10F-01A-11D-A10M-09	BRCA
PIK3CA	p.H1047R	Sensitive	Clinical Trials	PI3K/AKT/mTOR inhibitors	NA	NA	missense	TCGA-BH-A0GY-01A-11W-A071-09	BRCA
BRAF	p.V600E	Both	FDA Approved	vemurafenib, dabrafenib, trametinib, dabrafenib + trametinib	Clinical Trials	cetuximab, panitumumab	missense	TCGA-ET-A3BO-01A-11D-A19J-08	THCA
MTOR	p.S2215Y	Sensitive	Case Reports	rapamycin	NA	NA	missense	TCGA-AA-A00K-01A-02W-A005-10	COADREAD
IDH1	p.R132H	Sensitive	Case Reports	IDH1 inhibitor	NA	NA	missense	TCGA-DH-5143-01A-01D-1468-08	LGG
PIK3CA	p.E545K	Sensitive	Case Reports	mTOR inhibitors	NA	NA	missense	TCGA-DM-A28C-01A-11D-A16V-10	COADREAD
BRAF	p.V600E	Both	FDA Approved	vemurafenib, dabrafenib, trametinib, dabrafenib + trametinib	Clinical Trials	cetuximab, panitumumab	missense	TCGA-CM-6171-01A-11D-1650-10	COADREAD
BRCA1	p.R1147*	Sensitive	FDA Approved	PARP inhibitors	NA	NA	nonsense	TCGA-B5-A11E-01A-11D-A10M-09	UCEC
KRAS	p.G12D	Both	Clinical Trials	MEK inhibitors	FDA Approved	panitumumab	missense	TCGA-B5-A11E-01A-11D-A10M-09	UCEC
BRAF	p.D594G	Sensitive	Case Reports	sorafenib	NA	NA	missense	TCGA-DU-6402-01A-11D-1705-08	LGG
KRAS	p.Q61K	Both	Clinical Trials	MEK inhibitors	FDA Approved	panitumumab	missense	TCGA-D5-7000-01A-11D-1924-10	COADREAD
NRAS	p.Q61K	Both	Clinical Trials	MEK inhibitors	FDA Approved	cetuximab, panitumumab	missense	TCGA-EE-A3JI-06A-11D-A21A-08	SKCM
BRCA2	p.Q2157*	Sensitive	FDA Approved	PARP inhibitors	NA	NA	nonsense	TCGA-CF-A1HR-01A-11D-A13W-08	BLCA
PIK3CA	p.E542K	Sensitive	Case Reports	mTOR inhibitors	NA	NA	missense	TCGA-CV-A45V-01A-21D-A25D-08	HNSC
PIK3CA	p.E542K	Sensitive	Case Reports	mTOR inhibitors	NA	NA	missense	TCGA-02-0033-01A-01D-1490-08	GBM
FLT3	p.D835E	Both	Preclinical	lestaurtinib	Case Reports	sorafenib	missense	TCGA-AB-2814-03D-01W-0755-09	LAML
KRAS	p.G12V	Both	Clinical Trials	MEK inhibitors	FDA Approved	panitumumab	missense	TCGA-67-3773-01A-01D-1040-01	LUAD
ERBB2	p.V842I	Sensitive	Case Reports	lapatinib, neratinib	NA	NA	missense	TCGA-D1-A161-01A-11D-A122-09	UCEC
NOTCH1	p.T2371S	Sensitive	Clinical Trials	steroids early setting	NA	NA	missense	TCGA-HU-A4G6-01A-11D-A24D-08	STAD
HRAS	p.G12D	Sensitive	Case Reports	mTOR inhibitors	NA	NA	missense	TCGA-G2-A2EJ-01A-11D-A17V-08	BLCA
KRAS	p.G12V	Both	Clinical Trials	MEK inhibitors	FDA Approved	panitumumab	missense	TCGA-AX-A060-01A-11W-A027-09	UCEC
FGFR2	p.K660E	Both	Case Reports	ponatinib	Preclinical	dovitinib	missense	TCGA-BG-A0MS-01A-11D-A10B-09	UCEC
FGFR2	p.M538I	Both	Case Reports	ponatinib	Preclinical	dovitinib	missense	TCGA-BG-A0MS-01A-11D-A10B-09	UCEC
PIK3CA	p.E542K	Sensitive	Case Reports	mTOR inhibitors	NA	NA	missense	TCGA-EK-A3GM-01A-11D-A20U-09	CESC
GNAS	p.R201H	Sensitive	Case Reports	JAK inhibitors	NA	NA	missense	TCGA-EK-A3GM-01A-11D-A20U-09	CESC
ERBB2	p.L755S	Sensitive	Case Reports	neratinib	NA	NA	missense	TCGA-CU-A3YL-01A-11D-A22Z-08	BLCA
IDH1	p.R132H	Sensitive	Case Reports	IDH1 inhibitor	NA	NA	missense	TCGA-E1-5311-01A-01D-1468-08	LGG
BRAF	p.V600E	Both	FDA Approved	vemurafenib, dabrafenib, trametinib, dabrafenib + trametinib	Clinical Trials	cetuximab, panitumumab	missense	TCGA-AZ-4615-01A-01D-1408-10	COADREAD
PIK3CA	p.H1047R	Sensitive	Clinical Trials	PI3K/AKT/mTOR inhibitors	NA	NA	missense	TCGA-E2-A1IL-01A-11D-A14G-09	BRCA
BRAF	p.V600E	Both	FDA Approved	vemurafenib, dabrafenib, trametinib, dabrafenib + trametinib	Clinical Trials	cetuximab, panitumumab	missense	TCGA-FY-A4B3-01A-11D-A23U-08	THCA
PIK3CA	p.H1047R	Sensitive	Clinical Trials	PI3K/AKT/mTOR inhibitors	NA	NA	missense	TCGA-A8-A09C-01A-11W-A019-09	BRCA
BRAF	p.V600E	Both	FDA Approved	vemurafenib, dabrafenib, trametinib, dabrafenib + trametinib	Clinical Trials	cetuximab, panitumumab	missense	TCGA-DJ-A2PU-01A-12D-A19J-08	THCA
PIK3CA	p.E542K	Sensitive	Case Reports	mTOR inhibitors	NA	NA	missense	TCGA-CR-5249-01A-01D-1512-08	HNSC
NRAS	p.Q61R	Both	Clinical Trials	MEK inhibitors	FDA Approved	cetuximab, panitumumab	missense	TCGA-EM-A3OB-01A-11D-A21Z-08	THCA
PIK3CA	p.H1047R	Sensitive	Clinical Trials	PI3K/AKT/mTOR inhibitors	NA	NA	missense	TCGA-A8-A07B-01A-11W-A019-09	BRCA
IDH1	p.R132H	Sensitive	Case Reports	IDH1 inhibitor	NA	NA	missense	TCGA-EZ-7264-01A-11D-2024-08	LGG
IDH1	p.R132H	Sensitive	Case Reports	IDH1 inhibitor	NA	NA	missense	TCGA-HT-7471-01A-11D-2253-08	LGG
NRAS	p.Q61R	Both	Clinical Trials	MEK inhibitors	FDA Approved	cetuximab, panitumumab	missense	TCGA-BJ-A3PT-01A-12D-A21Z-08	THCA
PIK3CA	p.E545K	Sensitive	Case Reports	mTOR inhibitors	NA	NA	missense	TCGA-D7-6815-01A-11D-1882-08	STAD
GNAS	p.R201H	Sensitive	Case Reports	JAK inhibitors	NA	NA	missense	TCGA-D7-8574-01A-13D-2340-08	STAD
BRAF	p.V600E	Both	FDA Approved	vemurafenib, dabrafenib, trametinib, dabrafenib + trametinib	Clinical Trials	cetuximab, panitumumab	missense	TCGA-EE-A2A6-06A-11D-A197-08	SKCM
EGFR	p.L861Q	Sensitive	FDA Approved	erlotinib, afatinib	NA	NA	missense	TCGA-66-2742-01A-01D-0983-08	LUSC
BRCA1	p.*258E	Sensitive	FDA Approved	PARP inhibitors	NA	NA	nonsense	TCGA-61-1914	OV
EGFR	p.ELREA746in_frame_del	Sensitive	FDA Approved	erlotinib, afatinib	NA	NA	in_frame_del	TCGA-86-8280-01A-11D-2284-08	LUAD
PIK3CA	p.H1047R	Sensitive	Clinical Trials	PI3K/AKT/mTOR inhibitors	NA	NA	missense	TCGA-C8-A1HF-01A-11D-A135-09	BRCA
PIK3CA	p.E545K	Sensitive	Case Reports	mTOR inhibitors	NA	NA	missense	TCGA-BQ-5893-01A-11D-1589-08	KIRP
BRAF	p.V600E	Both	FDA Approved	vemurafenib, dabrafenib, trametinib, dabrafenib + trametinib	Clinical Trials	cetuximab, panitumumab	missense	TCGA-EM-A2OZ-01A-11D-A202-08	THCA
NOTCH2	p.P2219S	Sensitive	Case Reports	Gamma secretase inhibitors	NA	NA	missense	TCGA-EE-A29B-06A-11D-A197-08	SKCM
KRAS	p.Q61R	Both	Clinical Trials	MEK inhibitors	FDA Approved	panitumumab	missense	TCGA-EE-A29B-06A-11D-A197-08	SKCM
BRAF	p.V600E	Both	FDA Approved	vemurafenib, dabrafenib, trametinib, dabrafenib + trametinib	Clinical Trials	cetuximab, panitumumab	missense	TCGA-EL-A3GR-01A-21D-A202-08	THCA
PIK3CA	p.E542K	Sensitive	Case Reports	mTOR inhibitors	NA	NA	missense	TCGA-C5-A7CJ-01A-11D-A32I-09	CESC
BRAF	p.V600E	Both	FDA Approved	vemurafenib, dabrafenib, trametinib, dabrafenib + trametinib	Clinical Trials	cetuximab, panitumumab	missense	TCGA-BJ-A3EZ-01A-11D-A202-08	THCA
BRAF	p.V600E	Both	FDA Approved	vemurafenib, dabrafenib, trametinib, dabrafenib + trametinib	Clinical Trials	cetuximab, panitumumab	missense	TCGA-D3-A3C6-06A-12D-A196-08	SKCM
BRAF	p.V600E	Both	FDA Approved	vemurafenib, dabrafenib, trametinib, dabrafenib + trametinib	Clinical Trials	cetuximab, panitumumab	missense	TCGA-BJ-A3PR-01A-11D-A21Z-08	THCA
PIK3CA	p.E545K	Sensitive	Case Reports	mTOR inhibitors	NA	NA	missense	TCGA-D7-5578-01A-01D-1600-08	STAD
IDH1	p.R132H	Sensitive	Case Reports	IDH1 inhibitor	NA	NA	missense	TCGA-DH-5142-01A-01D-1468-08	LGG
BRAF	p.V600E	Both	FDA Approved	vemurafenib, dabrafenib, trametinib, dabrafenib + trametinib	Clinical Trials	cetuximab, panitumumab	missense	TCGA-FK-A3SH-01A-11D-A22D-08	THCA
BRCA1	p.W7*	Sensitive	FDA Approved	PARP inhibitors	NA	NA	nonsense	TCGA-CQ-5326-01A-01D-1870-08	HNSC
BRAF	p.V600E	Both	FDA Approved	vemurafenib, dabrafenib, trametinib, dabrafenib + trametinib	Clinical Trials	cetuximab, panitumumab	missense	TCGA-BJ-A4O8-01A-11D-A257-08	THCA
PIK3CA	p.E542K	Sensitive	Case Reports	mTOR inhibitors	NA	NA	missense	TCGA-BT-A20O-01A-21D-A14W-08	BLCA
NOTCH1	p.A1707T	Sensitive	Clinical Trials	steroids early setting	NA	NA	missense	TCGA-97-A4M0-01A-11D-A24P-08	LUAD
KRAS	p.G12C	Both	Clinical Trials	MEK inhibitors	FDA Approved	panitumumab	missense	TCGA-97-A4M0-01A-11D-A24P-08	LUAD
AKT1	p.E17K	Sensitive	Clinical Trials	AKT inhibitors	NA	NA	missense	TCGA-CV-5443-01A-01D-1512-08	HNSC
NRAS	p.Q61L	Both	Clinical Trials	MEK inhibitors	FDA Approved	cetuximab, panitumumab	missense	TCGA-FS-A1ZP-06A-11D-A197-08	SKCM
PIK3CA	p.E542K	Sensitive	Case Reports	mTOR inhibitors	NA	NA	missense	TCGA-CR-5243-01A-01D-1512-08	HNSC
BRAF	p.V600E	Both	FDA Approved	vemurafenib, dabrafenib, trametinib, dabrafenib + trametinib	Clinical Trials	cetuximab, panitumumab	missense	TCGA-FY-A3RA-01A-11D-A21Z-08	THCA
KRAS	p.G12D	Both	Clinical Trials	MEK inhibitors	FDA Approved	panitumumab	missense	TCGA-D5-6535-01A-11D-1719-10	COADREAD
NRAS	p.Q61R	Both	Clinical Trials	MEK inhibitors	FDA Approved	cetuximab, panitumumab	missense	TCGA-EM-A22J-01A-11D-A17V-08	THCA
IDH1	p.R132H	Sensitive	Case Reports	IDH1 inhibitor	NA	NA	missense	TCGA-FG-7638-01B-11D-2086-08	LGG
PIK3CA	p.H1047R	Sensitive	Clinical Trials	PI3K/AKT/mTOR inhibitors	NA	NA	missense	TCGA-BG-A18A-01A-21D-A12J-09	UCEC
NRAS	p.G13R	Both	Case Reports	MEK inhibitors	FDA Approved	cetuximab, panitumumab	missense	TCGA-AG-3725-01A-11D-1733-10	COADREAD
PIK3CA	p.E545K	Sensitive	Case Reports	mTOR inhibitors	NA	NA	missense	TCGA-BH-A18J-01A-11D-A12B-09	BRCA
PIK3CA	p.E542K	Sensitive	Case Reports	mTOR inhibitors	NA	NA	missense	TCGA-AR-A24S-01A-11D-A167-09	BRCA
KRAS	p.G12C	Both	Clinical Trials	MEK inhibitors	FDA Approved	panitumumab	missense	TCGA-J2-8194-01A-11D-2238-08	LUAD
AKT1	p.E17K	Sensitive	Clinical Trials	AKT inhibitors	NA	NA	missense	TCGA-D8-A27P-01A-11D-A16D-09	BRCA
PIK3CA	p.H1047R	Sensitive	Clinical Trials	PI3K/AKT/mTOR inhibitors	NA	NA	missense	TCGA-D8-A27P-01A-11D-A16D-09	BRCA
BRAF	p.V600E	Both	FDA Approved	vemurafenib, dabrafenib, trametinib, dabrafenib + trametinib	Clinical Trials	cetuximab, panitumumab	missense	TCGA-EE-A29A-06A-12D-A196-08	SKCM
ERBB2	p.L755S	Sensitive	Case Reports	neratinib	NA	NA	missense	TCGA-A8-A0AB-01A-11W-A050-09	BRCA
FGFR2	p.K660N	Sensitive	Case Reports	FGFR inhibitors	NA	NA	missense	TCGA-66-2780-01A-01D-1522-08	LUSC
KRAS	p.A146T	Both	Case Reports	MEK inhibitors + PI3K pathway inhibitors	Clinical Trials	cetuximab, panitumumab	missense	TCGA-F4-6856-01A-11D-1924-10	COADREAD
KRAS	p.G12V	Both	Clinical Trials	MEK inhibitors	FDA Approved	panitumumab	missense	TCGA-86-A456-01A-11D-A24D-08	LUAD
NOTCH2	p.A2321S	Sensitive	Case Reports	Gamma secretase inhibitors	NA	NA	missense	TCGA-17-Z021-01A-01W-0746-08	LUAD
IDH2	p.R140Q	Sensitive	Clinical Trials	IDH2 inhibitor	NA	NA	missense	TCGA-AB-2810-03B-01W-0728-08	LAML
KRAS	p.G12V	Both	Clinical Trials	MEK inhibitors	FDA Approved	panitumumab	missense	TCGA-D1-A17U-01A-21D-A12J-09	UCEC
KRAS	p.G12V	Both	Clinical Trials	MEK inhibitors	FDA Approved	panitumumab	missense	TCGA-17-Z050-01A-01W-0747-08	LUAD
ERBB2	p.S310F	Sensitive	Case Reports	ERBB2 TKIs, trastuzumab	NA	NA	missense	TCGA-G4-6298-01A-11D-1719-10	COADREAD
NRAS	p.Q61K	Both	Clinical Trials	MEK inhibitors	FDA Approved	cetuximab, panitumumab	missense	TCGA-G4-6298-01A-11D-1719-10	COADREAD
NRAS	p.Q61R	Both	Clinical Trials	MEK inhibitors	FDA Approved	cetuximab, panitumumab	missense	TCGA-FR-A3YN-06A-11D-A23B-08	SKCM
KRAS	p.G13D	Both	Clinical Trials	cetuximab	FDA Approved	panitumumab	missense	TCGA-62-A46S-01A-11D-A24D-08	LUAD
KRAS	p.Q61L	Both	Clinical Trials	MEK inhibitors	FDA Approved	panitumumab	missense	TCGA-AA-3521-01A-01W-0831-10	COADREAD
PIK3CA	p.E542K	Sensitive	Case Reports	mTOR inhibitors	NA	NA	missense	TCGA-DM-A1D8-01A-11D-A152-10	COADREAD
KRAS	p.G13D	Both	Clinical Trials	cetuximab	FDA Approved	panitumumab	missense	TCGA-DM-A1D8-01A-11D-A152-10	COADREAD
ERBB2	p.S310F	Sensitive	Case Reports	ERBB2 TKIs, trastuzumab	NA	NA	missense	TCGA-D6-A74Q-01A-11D-A34J-08	HNSC
BRCA2	p.N1784fs	Sensitive	FDA Approved	PARP inhibitors	NA	NA	frame_shift_del_unspecified	TCGA-BR-4368-01A-01D-1158-08	STAD
KRAS	p.G13D	Both	Clinical Trials	cetuximab	FDA Approved	panitumumab	missense	TCGA-BR-4368-01A-01D-1158-08	STAD
PIK3CA	p.E542K	Sensitive	Case Reports	mTOR inhibitors	NA	NA	missense	TCGA-G2-A3VY-01A-11D-A22Z-08	BLCA
PIK3CA	p.E545K	Sensitive	Case Reports	mTOR inhibitors	NA	NA	missense	TCGA-CR-7371-01A-11D-2012-08	HNSC
KRAS	p.G12V	Both	Clinical Trials	MEK inhibitors	FDA Approved	panitumumab	missense	TCGA-55-7728-01A-11D-2184-08	LUAD
NRAS	p.G12D	Both	Case Reports	MEK inhibitors	FDA Approved	cetuximab, panitumumab	missense	TCGA-DC-6682-01A-11D-1826-10	COADREAD
KRAS	p.G12C	Both	Clinical Trials	MEK inhibitors	FDA Approved	panitumumab	missense	TCGA-05-4418-01A-01D-1265-08	LUAD
BRAF	p.V600E	Both	FDA Approved	vemurafenib, dabrafenib, trametinib, dabrafenib + trametinib	Clinical Trials	cetuximab, panitumumab	missense	TCGA-DJ-A1QE-01A-21D-A14W-08	THCA
PIK3CA	p.H1047R	Sensitive	Clinical Trials	PI3K/AKT/mTOR inhibitors	NA	NA	missense	TCGA-BH-A0W5-01A-11D-A10G-09	BRCA
PIK3CA	p.E545K	Sensitive	Case Reports	mTOR inhibitors	NA	NA	missense	TCGA-FD-A3B5-01A-11D-A20D-08	BLCA
EGFR	p.L858R	Sensitive	FDA Approved	erlotinib, afatinib	NA	NA	missense	TCGA-97-A4M7-01A-11D-A24P-08	LUAD
BRAF	p.V600E	Both	FDA Approved	vemurafenib, dabrafenib, trametinib, dabrafenib + trametinib	Clinical Trials	cetuximab, panitumumab	missense	TCGA-FS-A1ZS-06A-12D-A197-08	SKCM
PIK3CA	p.E542K	Sensitive	Case Reports	mTOR inhibitors	NA	NA	missense	TCGA-AO-A0JA-01A-11W-A071-09	BRCA
IDH1	p.R132H	Sensitive	Case Reports	IDH1 inhibitor	NA	NA	missense	TCGA-FG-8191-01A-11D-2253-08	LGG
BRAF	p.V600E	Both	FDA Approved	vemurafenib, dabrafenib, trametinib, dabrafenib + trametinib	Clinical Trials	cetuximab, panitumumab	missense	TCGA-EB-A4IS-01A-21D-A25O-08	SKCM
BRAF	p.V600E	Both	FDA Approved	vemurafenib, dabrafenib, trametinib, dabrafenib + trametinib	Clinical Trials	cetuximab, panitumumab	missense	TCGA-A6-6649-01A-11D-1771-10	COADREAD
PIK3CA	p.H1047R	Sensitive	Clinical Trials	PI3K/AKT/mTOR inhibitors	NA	NA	missense	TCGA-AC-A5EH-01A-11D-A28B-09	BRCA
NOTCH2	p.L2415P	Sensitive	Case Reports	Gamma secretase inhibitors	NA	NA	missense	TCGA-CC-A3MB-01A-11D-A20W-10	LIHC
KRAS	p.G12A	Both	Clinical Trials	MEK inhibitors	FDA Approved	panitumumab	missense	TCGA-97-7941-01A-11D-2184-08	LUAD
IDH1	p.R132H	Sensitive	Case Reports	IDH1 inhibitor	NA	NA	missense	TCGA-DU-7294-01A-11D-2024-08	LGG
BRAF	p.V600E	Both	FDA Approved	vemurafenib, dabrafenib, trametinib, dabrafenib + trametinib	Clinical Trials	cetuximab, panitumumab	missense	TCGA-EL-A3MW-01A-11D-A20C-08	THCA
PIK3CA	p.E542K	Sensitive	Case Reports	mTOR inhibitors	NA	NA	missense	TCGA-AR-A24M-01A-11D-A167-09	BRCA
NRAS	p.G12D	Both	Case Reports	MEK inhibitors	FDA Approved	cetuximab, panitumumab	missense	TCGA-AB-2984-03A-01D-0739-09	LAML
NRAS	p.Q61K	Both	Clinical Trials	MEK inhibitors	FDA Approved	cetuximab, panitumumab	missense	TCGA-EE-A2MN-06A-11D-A197-08	SKCM
FLT3	p.D835H	Both	Preclinical	lestaurtinib	Case Reports	sorafenib	missense	TCGA-AB-2910-03A-01W-0745-08	LAML
KIT	p.P573Q	Sensitive	FDA Approved	imatinib, sunitinib, regorafenib	NA	NA	missense	TCGA-CC-A5UD-01A-11D-A28X-10	LIHC
EGFR	p.A289V	Sensitive	Case Reports	erlotinib	NA	NA	missense	TCGA-06-0157-01A-01D-1491-08	GBM
PDGFRA	p.R558C	Sensitive	Clinical Trials	imatinib	NA	NA	missense	TCGA-EE-A2MR-06A-11D-A196-08	SKCM
PIK3CA	p.E545K	Sensitive	Case Reports	mTOR inhibitors	NA	NA	missense	TCGA-C5-A1MK-01A-11D-A14W-08	CESC
KRAS	p.G12S	Both	Clinical Trials	MEK inhibitors	FDA Approved	panitumumab	missense	TCGA-BR-8687-01A-11D-2394-08	STAD
NOTCH2	p.A2346V	Sensitive	Case Reports	Gamma secretase inhibitors	NA	NA	missense	TCGA-ER-A19A-06A-21D-A197-08	SKCM
BRAF	p.V600E	Both	FDA Approved	vemurafenib, dabrafenib, trametinib, dabrafenib + trametinib	Clinical Trials	cetuximab, panitumumab	missense	TCGA-BJ-A28R-01A-11D-A16O-08	THCA
PIK3CA	p.H1047R	Sensitive	Clinical Trials	PI3K/AKT/mTOR inhibitors	NA	NA	missense	TCGA-AC-A3YJ-01A-11D-A22X-09	BRCA
KRAS	p.G13C	Both	Clinical Trials	MEK inhibitors	FDA Approved	panitumumab	missense	TCGA-55-6975-01A-11D-1945-08	LUAD
BRAF	p.V600E	Both	FDA Approved	vemurafenib, dabrafenib, trametinib, dabrafenib + trametinib	Clinical Trials	cetuximab, panitumumab	missense	TCGA-DJ-A2PQ-01A-11D-A18F-08	THCA
IDH1	p.R132H	Sensitive	Case Reports	IDH1 inhibitor	NA	NA	missense	TCGA-DB-A4XB-01A-11D-A26M-08	LGG
PIK3CA	p.E545K	Sensitive	Case Reports	mTOR inhibitors	NA	NA	missense	TCGA-AA-3712-01A-21D-1719-10	COADREAD
EGFR	p.L858R	Sensitive	FDA Approved	erlotinib, afatinib	NA	NA	missense	TCGA-86-8055-01A-11D-2238-08	LUAD
FGFR2	p.S252W	Sensitive	Case Reports	FGFR inhibitors	NA	NA	missense	TCGA-A5-A0GQ-01A-11D-A122-09	UCEC
NOTCH1	p.P2498T	Sensitive	Clinical Trials	steroids early setting	NA	NA	missense	TCGA-G7-6797-01A-11D-1961-08	KIRP
BRAF	p.V600E	Both	FDA Approved	vemurafenib, dabrafenib, trametinib, dabrafenib + trametinib	Clinical Trials	cetuximab, panitumumab	missense	TCGA-ER-A19H-06A-12D-A196-08	SKCM
PIK3CA	p.E542K	Sensitive	Case Reports	mTOR inhibitors	NA	NA	missense	TCGA-E2-A15P-01A-11D-A10Y-09	BRCA
KRAS	p.G13D	Both	Clinical Trials	cetuximab	FDA Approved	panitumumab	missense	TCGA-C5-A3HF-01A-11D-A20U-09	CESC
BRAF	p.V600E	Both	FDA Approved	vemurafenib, dabrafenib, trametinib, dabrafenib + trametinib	Clinical Trials	cetuximab, panitumumab	missense	TCGA-D5-6534-01A-21D-1924-10	COADREAD
KRAS	p.G12D	Both	Clinical Trials	MEK inhibitors	FDA Approved	panitumumab	missense	TCGA-J2-A4AG-01A-11D-A24D-08	LUAD
PDGFRA	p.L655F	Sensitive	Clinical Trials	imatinib	NA	NA	missense	TCGA-06-2559-01A-01D-1494-08	GBM
BRCA1	p.*208S	Sensitive	FDA Approved	PARP inhibitors	NA	NA	nonsense	TCGA-DK-A3IN-01A-11D-A20D-08	BLCA
NRAS	p.Q61R	Both	Clinical Trials	MEK inhibitors	FDA Approved	cetuximab, panitumumab	missense	TCGA-FS-A1ZB-06A-12D-A197-08	SKCM
IDH1	p.R132H	Sensitive	Case Reports	IDH1 inhibitor	NA	NA	missense	TCGA-DH-5144-01A-01D-1468-08	LGG
BRCA1	p.E1167*	Sensitive	FDA Approved	PARP inhibitors	NA	NA	nonsense	TCGA-55-8620-01A-11D-2393-08	LUAD
KRAS	p.G12C	Both	Clinical Trials	MEK inhibitors	FDA Approved	panitumumab	missense	TCGA-73-7498-01A-12D-2184-08	LUAD
KRAS	p.G12V	Both	Clinical Trials	MEK inhibitors	FDA Approved	panitumumab	missense	TCGA-AF-6672-01A-11D-1826-10	COADREAD
BRAF	p.V600E	Both	FDA Approved	vemurafenib, dabrafenib, trametinib, dabrafenib + trametinib	Clinical Trials	cetuximab, panitumumab	missense	TCGA-EM-A1CV-01A-11D-A13W-08	THCA
IDH1	p.R132H	Sensitive	Case Reports	IDH1 inhibitor	NA	NA	missense	TCGA-HT-A615-01A-11D-A29Q-08	LGG
NOTCH1	p.G2427D	Sensitive	Clinical Trials	steroids early setting	NA	NA	missense	TCGA-AY-6197-01A-11D-1719-10	COADREAD
BRAF	p.V600E	Both	FDA Approved	vemurafenib, dabrafenib, trametinib, dabrafenib + trametinib	Clinical Trials	cetuximab, panitumumab	missense	TCGA-EB-A3Y6-01A-21D-A23B-08	SKCM
IDH1	p.R132H	Sensitive	Case Reports	IDH1 inhibitor	NA	NA	missense	TCGA-E1-5307-01A-01D-1893-08	LGG
IDH1	p.R132H	Sensitive	Case Reports	IDH1 inhibitor	NA	NA	missense	TCGA-DU-6396-01A-11D-1705-08	LGG
PIK3CA	p.E542K	Sensitive	Case Reports	mTOR inhibitors	NA	NA	missense	TCGA-BR-8676-01A-11D-2394-08	STAD
PIK3CA	p.E542K	Sensitive	Case Reports	mTOR inhibitors	NA	NA	missense	TCGA-DZ-6134-01A-11D-1961-08	KIRP
PIK3CA	p.E545K	Sensitive	Case Reports	mTOR inhibitors	NA	NA	missense	TCGA-CJ-6033-01A-11D-1669-08	KIRC
BRAF	p.V600E	Both	FDA Approved	vemurafenib, dabrafenib, trametinib, dabrafenib + trametinib	Clinical Trials	cetuximab, panitumumab	missense	TCGA-MK-A4N7-01A-11D-A257-08	THCA
PDGFRA	p.D842H	Sensitive	Clinical Trials	imatinib	NA	NA	missense	TCGA-34-2600-01A-01D-1522-08	LUSC
IDH1	p.R132H	Sensitive	Case Reports	IDH1 inhibitor	NA	NA	missense	TCGA-P5-A5EX-01A-12D-A289-08	LGG
PIK3CA	p.E545K	Sensitive	Case Reports	mTOR inhibitors	NA	NA	missense	TCGA-CV-7250-01A-11D-2012-08	HNSC
ERBB2	p.S310F	Sensitive	Case Reports	ERBB2 TKIs, trastuzumab	NA	NA	missense	TCGA-13-0889	OV
BRAF	p.V600E	Both	FDA Approved	vemurafenib, dabrafenib, trametinib, dabrafenib + trametinib	Clinical Trials	cetuximab, panitumumab	missense	TCGA-E8-A436-01A-12D-A23U-08	THCA
BRAF	p.V600E	Both	FDA Approved	vemurafenib, dabrafenib, trametinib, dabrafenib + trametinib	Clinical Trials	cetuximab, panitumumab	missense	TCGA-BJ-A45I-01A-11D-A23U-08	THCA
PIK3CA	p.E542K	Sensitive	Case Reports	mTOR inhibitors	NA	NA	missense	TCGA-HN-A2OB-01A-21D-A27P-09	BRCA
KRAS	p.G12D	Both	Clinical Trials	MEK inhibitors	FDA Approved	panitumumab	missense	TCGA-D5-6932-01A-11D-1924-10	COADREAD
KRAS	p.G12D	Both	Clinical Trials	MEK inhibitors	FDA Approved	panitumumab	missense	TCGA-86-8076-01A-31D-2238-08	LUAD
CTNNB1	p.D32V	Sensitive	Clinical Trials	everolimus + letrozole	NA	NA	missense	TCGA-RC-A6M4-01A-11D-A32G-10	LIHC
PIK3CA	p.E542K	Sensitive	Case Reports	mTOR inhibitors	NA	NA	missense	TCGA-Q1-A73P-01A-11D-A32I-09	CESC
PIK3CA	p.H1047R	Sensitive	Clinical Trials	PI3K/AKT/mTOR inhibitors	NA	NA	missense	TCGA-AC-A23E-01A-11D-A159-09	BRCA
JAK3	p.R657Q	Sensitive	Case Reports	JAK inhibitors	NA	NA	missense	TCGA-18-3409-01A-01D-0983-08	LUSC
BRAF	p.V600E	Both	FDA Approved	vemurafenib, dabrafenib, trametinib, dabrafenib + trametinib	Clinical Trials	cetuximab, panitumumab	missense	TCGA-EE-A2M6-06A-12D-A197-08	SKCM
BRAF	p.V600E	Both	FDA Approved	vemurafenib, dabrafenib, trametinib, dabrafenib + trametinib	Clinical Trials	cetuximab, panitumumab	missense	TCGA-DJ-A2QC-01A-11D-A18F-08	THCA
NRAS	p.Q61K	Both	Clinical Trials	MEK inhibitors	FDA Approved	cetuximab, panitumumab	missense	TCGA-EE-A2GD-06A-11D-A196-08	SKCM
EGFR	p.A289V	Sensitive	Case Reports	erlotinib	NA	NA	missense	TCGA-06-0142-01A-01D-1490-08	GBM
NRAS	p.Q61R	Both	Clinical Trials	MEK inhibitors	FDA Approved	cetuximab, panitumumab	missense	TCGA-DJ-A2PP-01A-11D-A19J-08	THCA
BRAF	p.V600E	Both	FDA Approved	vemurafenib, dabrafenib, trametinib, dabrafenib + trametinib	Clinical Trials	cetuximab, panitumumab	missense	TCGA-D9-A4Z2-01A-11D-A24R-08	SKCM
PIK3CA	p.E545K	Sensitive	Case Reports	mTOR inhibitors	NA	NA	missense	TCGA-AN-A0XS-01A-22D-A10G-09	BRCA
IDH2	p.R140Q	Sensitive	Clinical Trials	IDH2 inhibitor	NA	NA	missense	TCGA-AB-2826-03B-01W-0728-08	LAML
KRAS	p.Q61H	Both	Clinical Trials	MEK inhibitors	FDA Approved	panitumumab	missense	TCGA-AB-2826-03B-01W-0728-08	LAML
IDH1	p.R132H	Sensitive	Case Reports	IDH1 inhibitor	NA	NA	missense	TCGA-DB-5280-01A-01D-1468-08	LGG
PIK3CA	p.E542K	Sensitive	Case Reports	mTOR inhibitors	NA	NA	missense	TCGA-B5-A0JV-01A-11D-A10B-09	UCEC
NRAS	p.Q61K	Both	Clinical Trials	MEK inhibitors	FDA Approved	cetuximab, panitumumab	missense	TCGA-B5-A0JV-01A-11D-A10B-09	UCEC
KRAS	p.G12D	Both	Clinical Trials	MEK inhibitors	FDA Approved	panitumumab	missense	TCGA-B5-A0JV-01A-11D-A10B-09	UCEC
PIK3CA	p.E542K	Sensitive	Case Reports	mTOR inhibitors	NA	NA	missense	TCGA-LP-A4AV-01A-11D-A243-09	CESC
NOTCH1	p.V1676I	Sensitive	Clinical Trials	steroids early setting	NA	NA	missense	TCGA-CD-8536-01A-11D-2340-08	STAD
AKT1	p.E17K	Sensitive	Clinical Trials	AKT inhibitors	NA	NA	missense	TCGA-EJ-5530-01A-01D-1576-08	PRAD
PIK3CA	p.E542K	Sensitive	Case Reports	mTOR inhibitors	NA	NA	missense	TCGA-Q1-A5R3-01A-11D-A28B-09	CESC
PIK3CA	p.H1047R	Sensitive	Clinical Trials	PI3K/AKT/mTOR inhibitors	NA	NA	missense	TCGA-E9-A227-01A-11D-A159-09	BRCA
PIK3CA	p.E542K	Sensitive	Case Reports	mTOR inhibitors	NA	NA	missense	TCGA-E9-A1N5-01A-11D-A14G-09	BRCA
NRAS	p.G13R	Both	Case Reports	MEK inhibitors	FDA Approved	cetuximab, panitumumab	missense	TCGA-BT-A20W-01A-21D-A14W-08	BLCA
BRCA1	p.Q155*	Sensitive	FDA Approved	PARP inhibitors	NA	NA	nonsense	TCGA-EE-A20C-06A-11D-A196-08	SKCM
NRAS	p.Q61R	Both	Clinical Trials	MEK inhibitors	FDA Approved	cetuximab, panitumumab	missense	TCGA-EE-A20C-06A-11D-A196-08	SKCM
EGFR	p.G598V	Sensitive	Case Reports	erlotinib	NA	NA	missense	TCGA-19-2620-01A-01D-1495-08	GBM
KRAS	p.G12C	Both	Clinical Trials	MEK inhibitors	FDA Approved	panitumumab	missense	TCGA-17-Z036-01A-01W-0746-08	LUAD
PIK3CA	p.H1047R	Sensitive	Clinical Trials	PI3K/AKT/mTOR inhibitors	NA	NA	missense	TCGA-AN-A03Y-01A-21W-A019-09	BRCA
EGFR	p.ELREA746in_frame_del	Sensitive	FDA Approved	erlotinib, afatinib	NA	NA	in_frame_del	TCGA-86-8074-01A-11D-2238-08	LUAD
IDH1	p.R132H	Sensitive	Case Reports	IDH1 inhibitor	NA	NA	missense	TCGA-CS-5390-01A-02D-1468-08	LGG
NRAS	p.Q61K	Both	Clinical Trials	MEK inhibitors	FDA Approved	cetuximab, panitumumab	missense	TCGA-CS-5390-01A-02D-1468-08	LGG
KRAS	p.G12C	Both	Clinical Trials	MEK inhibitors	FDA Approved	panitumumab	missense	TCGA-MN-A4N5-01A-11D-A24P-08	LUAD
IDH1	p.R132H	Sensitive	Case Reports	IDH1 inhibitor	NA	NA	missense	TCGA-HT-7879-01A-11D-2395-08	LGG
PIK3CA	p.H1047R	Sensitive	Clinical Trials	PI3K/AKT/mTOR inhibitors	NA	NA	missense	TCGA-GM-A2D9-01A-11D-A18P-09	BRCA
PIK3CA	p.E545K	Sensitive	Case Reports	mTOR inhibitors	NA	NA	missense	TCGA-CM-4748-01A-01D-1408-10	COADREAD
KRAS	p.G12D	Both	Clinical Trials	MEK inhibitors	FDA Approved	panitumumab	missense	TCGA-CM-4748-01A-01D-1408-10	COADREAD
NRAS	p.G12V	Both	Case Reports	MEK inhibitors	FDA Approved	cetuximab, panitumumab	missense	TCGA-DM-A1DA-01A-11D-A152-10	COADREAD
KRAS	p.G12A	Both	Clinical Trials	MEK inhibitors	FDA Approved	panitumumab	missense	TCGA-D5-6531-01A-11D-1719-10	COADREAD
BRAF	p.V600E	Both	FDA Approved	vemurafenib, dabrafenib, trametinib, dabrafenib + trametinib	Clinical Trials	cetuximab, panitumumab	missense	TCGA-BJ-A3PU-01A-11D-A21Z-08	THCA
BRCA2	p.Q2870*	Sensitive	FDA Approved	PARP inhibitors	NA	NA	nonsense	TCGA-EE-A2GO-06A-11D-A196-08	SKCM
IDH1	p.R132H	Sensitive	Case Reports	IDH1 inhibitor	NA	NA	missense	TCGA-HW-8322-01A-11D-2395-08	LGG
PIK3CA	p.H1047R	Sensitive	Clinical Trials	PI3K/AKT/mTOR inhibitors	NA	NA	missense	TCGA-A2-A0EV-01A-11W-A050-09	BRCA
SF3B1	p.K700E	Sensitive	Case Reports	spliceosome inhibitor	NA	NA	missense	TCGA-A2-A0EV-01A-11W-A050-09	BRCA
PIK3CA	p.E545K	Sensitive	Case Reports	mTOR inhibitors	NA	NA	missense	TCGA-EA-A5FO-01A-21D-A28B-09	CESC
EGFR	p.ELREA746in_frame_del	Sensitive	FDA Approved	erlotinib, afatinib	NA	NA	in_frame_del	TCGA-97-A4M6-01A-11D-A24P-08	LUAD
NRAS	p.Q61K	Both	Clinical Trials	MEK inhibitors	FDA Approved	cetuximab, panitumumab	missense	TCGA-FS-A4F9-06A-11D-A24R-08	SKCM
PIK3CA	p.E542K	Sensitive	Case Reports	mTOR inhibitors	NA	NA	missense	TCGA-CN-6021-01A-11D-1683-08	HNSC
IDH1	p.R132H	Sensitive	Case Reports	IDH1 inhibitor	NA	NA	missense	TCGA-HT-A619-01A-11D-A29Q-08	LGG
PIK3CA	p.H1047R	Sensitive	Clinical Trials	PI3K/AKT/mTOR inhibitors	NA	NA	missense	TCGA-BH-A0BD-01A-11W-A050-09	BRCA
KRAS	p.G12A	Both	Clinical Trials	MEK inhibitors	FDA Approved	panitumumab	missense	TCGA-17-Z037-01A-01W-0746-08	LUAD
BRAF	p.V600E	Both	FDA Approved	vemurafenib, dabrafenib, trametinib, dabrafenib + trametinib	Clinical Trials	cetuximab, panitumumab	missense	TCGA-MK-A4N9-01A-11D-A257-08	THCA
IDH1	p.R132H	Sensitive	Case Reports	IDH1 inhibitor	NA	NA	missense	TCGA-HT-7677-01A-11D-2253-08	LGG
PIK3CA	p.E542K	Sensitive	Case Reports	mTOR inhibitors	NA	NA	missense	TCGA-A2-A0CR-01A-11D-A228-09	BRCA
IDH1	p.R132H	Sensitive	Case Reports	IDH1 inhibitor	NA	NA	missense	TCGA-HW-8319-01A-11D-2395-08	LGG
KRAS	p.G12D	Both	Clinical Trials	MEK inhibitors	FDA Approved	panitumumab	missense	TCGA-FU-A3EO-01A-11D-A20U-09	CESC
IDH1	p.R132H	Sensitive	Case Reports	IDH1 inhibitor	NA	NA	missense	TCGA-FG-7637-01A-11D-2086-08	LGG
KRAS	p.G12D	Both	Clinical Trials	MEK inhibitors	FDA Approved	panitumumab	missense	TCGA-BQ-5883-01A-11D-1589-08	KIRP
IDH1	p.R132H	Sensitive	Case Reports	IDH1 inhibitor	NA	NA	missense	TCGA-DU-6542-01A-11D-1893-08	LGG
BRCA1	p.R1455*	Sensitive	FDA Approved	PARP inhibitors	NA	NA	nonsense	TCGA-HU-8243-01A-11D-2340-08	STAD
NRAS	p.Q61H	Both	Clinical Trials	MEK inhibitors	FDA Approved	cetuximab, panitumumab	missense	TCGA-EE-A2MM-06A-11D-A196-08	SKCM
PIK3CA	p.E545K	Sensitive	Case Reports	mTOR inhibitors	NA	NA	missense	TCGA-A7-A26E	BRCA
KRAS	p.G12D	Both	Clinical Trials	MEK inhibitors	FDA Approved	panitumumab	missense	TCGA-62-8398-01A-11D-2323-08	LUAD
CTNNB1	p.S37C	Sensitive	Clinical Trials	everolimus + letrozole	NA	NA	missense	TCGA-AX-A0IS-01A-12D-A10M-09	UCEC
ESR1	p.Y537N	Both	Clinical Trials	novel estrogen receptor degrader	Clinical Trials	anti-estrogens	missense	TCGA-AX-A0IS-01A-12D-A10M-09	UCEC
PIK3CA	p.E545K	Sensitive	Case Reports	mTOR inhibitors	NA	NA	missense	TCGA-DM-A285-01A-11D-A16V-10	COADREAD
NOTCH2	p.MG2099IC	Sensitive	Case Reports	Gamma secretase inhibitors	NA	NA	missense	TCGA-D3-A2J6-06A-11D-A19A-08	SKCM
NOTCH2	p.P2150N	Sensitive	Case Reports	Gamma secretase inhibitors	NA	NA	missense	TCGA-D3-A2J6-06A-11D-A19A-08	SKCM
BRAF	p.V600E	Both	FDA Approved	vemurafenib, dabrafenib, trametinib, dabrafenib + trametinib	Clinical Trials	cetuximab, panitumumab	missense	TCGA-ET-A3DP-01A-11D-A21A-08	THCA
NRAS	p.Q61R	Both	Clinical Trials	MEK inhibitors	FDA Approved	cetuximab, panitumumab	missense	TCGA-HJ-7597-01A-21D-2201-08	STAD
IDH1	p.R132H	Sensitive	Case Reports	IDH1 inhibitor	NA	NA	missense	TCGA-26-1442-01A-01D-1696-08	GBM
NRAS	p.Q61R	Both	Clinical Trials	MEK inhibitors	FDA Approved	cetuximab, panitumumab	missense	TCGA-AB-2923-03A-01W-0745-08	LAML
EGFR	p.ELREA746in_frame_del	Sensitive	FDA Approved	erlotinib, afatinib	NA	NA	in_frame_del	TCGA-75-7025-01A-12D-1945-08	LUAD
PIK3CA	p.E545K	Sensitive	Case Reports	mTOR inhibitors	NA	NA	missense	TCGA-D1-A168-01A-31D-A12J-09	UCEC
KRAS	p.G13D	Both	Clinical Trials	cetuximab	FDA Approved	panitumumab	missense	TCGA-D1-A168-01A-31D-A12J-09	UCEC
BRAF	p.V600E	Both	FDA Approved	vemurafenib, dabrafenib, trametinib, dabrafenib + trametinib	Clinical Trials	cetuximab, panitumumab	missense	TCGA-H2-A3RI-01A-11D-A21Z-08	THCA
KRAS	p.G12V	Both	Clinical Trials	MEK inhibitors	FDA Approved	panitumumab	missense	TCGA-D5-6538-01A-11D-1719-10	COADREAD
KIT	p.R804W	Both	Preclinical	sorafenib	Clinical Trials	imatinib	missense	TCGA-D1-A174-01A-11D-A12J-09	UCEC
IDH1	p.R132H	Sensitive	Case Reports	IDH1 inhibitor	NA	NA	missense	TCGA-HT-8111-01A-11D-2395-08	LGG
BRAF	p.G469A	Both	Case Reports	EGFR TKIs + MEK inhibitors in EGFR mutant	Case Reports	EGFR TKIs	missense	TCGA-DA-A1IB-06A-11D-A196-08	SKCM
KRAS	p.G12D	Both	Clinical Trials	MEK inhibitors	FDA Approved	panitumumab	missense	TCGA-AZ-5407-01A-01D-1719-10	COADREAD
MAP2K1	p.C121S	Both	Case Reports	novel MEK inhibitors	Case Reports	BRAF inhibitors, MEK inhibitors	missense	TCGA-64-1676	LUAD
BRAF	p.V600E	Both	FDA Approved	vemurafenib, dabrafenib, trametinib, dabrafenib + trametinib	Clinical Trials	cetuximab, panitumumab	missense	TCGA-DJ-A3UU-01A-11D-A22D-08	THCA
BRAF	p.V600E	Both	FDA Approved	vemurafenib, dabrafenib, trametinib, dabrafenib + trametinib	Clinical Trials	cetuximab, panitumumab	missense	TCGA-EE-A3AG-06A-31D-A196-08	SKCM
KRAS	p.G12V	Both	Clinical Trials	MEK inhibitors	FDA Approved	panitumumab	missense	TCGA-BG-A0M9-01A-21W-A10C-09	UCEC
EGFR	p.T263P	Sensitive	Case Reports	erlotinib	NA	NA	missense	TCGA-16-1045-01B-01W-0611-08	GBM
MAP2K1	p.P124L	Both	Case Reports	ERK inhibitors	Clinical Trials	BRAF inhibitors	missense	TCGA-EE-A2MU-06A-21D-A196-08	SKCM
NRAS	p.QE61HK	Both	Clinical Trials	MEK inhibitors	FDA Approved	cetuximab, panitumumab	missense	TCGA-EE-A2MU-06A-21D-A196-08	SKCM
KIT	p.R634Q	Sensitive	FDA Approved	imatinib	NA	NA	missense	TCGA-EK-A2GZ-01A-11D-A17W-09	CESC
NOTCH1	p.A2441T	Sensitive	Clinical Trials	steroids early setting	NA	NA	missense	TCGA-AR-A254-01A-21D-A167-09	BRCA
IDH1	p.R132H	Sensitive	Case Reports	IDH1 inhibitor	NA	NA	missense	TCGA-DU-7299-01A-21D-2024-08	LGG
BRAF	p.V600E	Both	FDA Approved	vemurafenib, dabrafenib, trametinib, dabrafenib + trametinib	Clinical Trials	cetuximab, panitumumab	missense	TCGA-FE-A237-01A-11D-A16O-08	THCA
MAP2K1	p.P124S	Both	Preclinical	BRAF inhibitors in BRAF mutant tumor	Clinical Trials	BRAF inhibitors	missense	TCGA-D3-A1Q6-06A-11D-A196-08	SKCM
BRAF	p.V600E	Both	FDA Approved	vemurafenib, dabrafenib, trametinib, dabrafenib + trametinib	Clinical Trials	cetuximab, panitumumab	missense	TCGA-D3-A1Q6-06A-11D-A196-08	SKCM
PIK3CA	p.E542K	Sensitive	Case Reports	mTOR inhibitors	NA	NA	missense	TCGA-CQ-6218-01A-11D-1912-08	HNSC
KIT	p.D816V	Both	Preclinical	dasatinib	Clinical Trials	imatinib	missense	TCGA-AB-2843-03B-01W-0728-08	LAML
PIK3CA	p.E545K	Sensitive	Case Reports	mTOR inhibitors	NA	NA	missense	TCGA-EA-A3HT-01A-61D-A21Q-09	CESC
KRAS	p.G12V	Both	Clinical Trials	MEK inhibitors	FDA Approved	panitumumab	missense	TCGA-MP-A4T7-01A-11D-A24P-08	LUAD
IDH1	p.R132H	Sensitive	Case Reports	IDH1 inhibitor	NA	NA	missense	TCGA-P5-A5F2-01A-11D-A289-08	LGG
PIK3CA	p.H1047R	Sensitive	Clinical Trials	PI3K/AKT/mTOR inhibitors	NA	NA	missense	TCGA-E9-A1NH-01A-11D-A14G-09	BRCA
KRAS	p.G12D	Both	Clinical Trials	MEK inhibitors	FDA Approved	panitumumab	missense	TCGA-86-7953-01A-11D-2184-08	LUAD
IDH1	p.R132H	Sensitive	Case Reports	IDH1 inhibitor	NA	NA	missense	TCGA-FG-7641-01B-11D-2253-08	LGG
IDH1	p.R132H	Sensitive	Case Reports	IDH1 inhibitor	NA	NA	missense	TCGA-HW-8320-01A-11D-2395-08	LGG
MAP2K1	p.P124S	Both	Preclinical	BRAF inhibitors in BRAF mutant tumor	Clinical Trials	BRAF inhibitors	missense	TCGA-EB-A299-01A-21D-A197-08	SKCM
BRAF	p.V600E	Both	FDA Approved	vemurafenib, dabrafenib, trametinib, dabrafenib + trametinib	Clinical Trials	cetuximab, panitumumab	missense	TCGA-EB-A299-01A-21D-A197-08	SKCM
EGFR	p.L858R	Sensitive	FDA Approved	erlotinib, afatinib	NA	NA	missense	TCGA-67-3772-01A-01W-0928-08	LUAD
IDH1	p.R132H	Sensitive	Case Reports	IDH1 inhibitor	NA	NA	missense	TCGA-QH-A65S-01A-11D-A29Q-08	LGG
PIK3CA	p.H1047R	Sensitive	Clinical Trials	PI3K/AKT/mTOR inhibitors	NA	NA	missense	TCGA-A2-A0D3-01A-11D-A10Y-09	BRCA
KRAS	p.G12V	Both	Clinical Trials	MEK inhibitors	FDA Approved	panitumumab	missense	TCGA-MP-A4TK-01A-11D-A24P-08	LUAD
BRAF	p.V600E	Both	FDA Approved	vemurafenib, dabrafenib, trametinib, dabrafenib + trametinib	Clinical Trials	cetuximab, panitumumab	missense	TCGA-FE-A232-01A-11D-A14W-08	THCA
PIK3CA	p.E545K	Sensitive	Case Reports	mTOR inhibitors	NA	NA	missense	TCGA-CV-5435-01A-01D-1683-08	HNSC
BRAF	p.V600E	Both	FDA Approved	vemurafenib, dabrafenib, trametinib, dabrafenib + trametinib	Clinical Trials	cetuximab, panitumumab	missense	TCGA-IM-A3ED-01A-11D-A202-08	THCA
FGFR2	p.N550K	Both	Case Reports	ponatinib	Preclinical	Dovitinib	missense	TCGA-AX-A06H-01A-11D-A122-09	UCEC
FGFR2	p.N549K	Sensitive	Case Reports	FGFR inhibitors	NA	NA	missense	TCGA-AX-A06H-01A-11D-A122-09	UCEC
PIK3CA	p.E545K	Sensitive	Case Reports	mTOR inhibitors	NA	NA	missense	TCGA-D8-A27T-01A-11D-A16D-09	BRCA
BRAF	p.V600E	Both	FDA Approved	vemurafenib, dabrafenib, trametinib, dabrafenib + trametinib	Clinical Trials	cetuximab, panitumumab	missense	TCGA-ET-A25O-01A-11D-A17V-08	THCA
IDH1	p.R132H	Sensitive	Case Reports	IDH1 inhibitor	NA	NA	missense	TCGA-DU-6395-01A-12D-1705-08	LGG
PIK3CA	p.E545K	Sensitive	Case Reports	mTOR inhibitors	NA	NA	missense	TCGA-EK-A3GJ-01A-21D-A20U-09	CESC
EGFR	p.771in_frame_insSVD	Both	Clinical Trials	HSP90 inhibitors	FDA Approved	gefitinib	in_frame_ins	TCGA-19-2625-01A-01D-1495-08	GBM
IDH1	p.R132H	Sensitive	Case Reports	IDH1 inhibitor	NA	NA	missense	TCGA-HT-7688-01A-11D-2253-08	LGG
BRAF	p.V600E	Both	FDA Approved	vemurafenib, dabrafenib, trametinib, dabrafenib + trametinib	Clinical Trials	cetuximab, panitumumab	missense	TCGA-J8-A3NZ-01A-11D-A21A-08	THCA
IDH1	p.R132H	Sensitive	Case Reports	IDH1 inhibitor	NA	NA	missense	TCGA-HT-7473-01A-11D-2024-08	LGG
KIT	p.L706F	Sensitive	Clinical Trials	sunitinib	NA	NA	missense	TCGA-EE-A2MT-06A-11D-A197-08	SKCM
NRAS	p.Q61R	Both	Clinical Trials	MEK inhibitors	FDA Approved	cetuximab, panitumumab	missense	TCGA-EL-A3T2-01A-11D-A22D-08	THCA
PDGFRA	p.S847L	Sensitive	Clinical Trials	imatinib	NA	NA	missense	TCGA-D3-A3CB-06A-11D-A196-08	SKCM
BRAF	p.V600E	Both	FDA Approved	vemurafenib, dabrafenib, trametinib, dabrafenib + trametinib	Clinical Trials	cetuximab, panitumumab	missense	TCGA-D3-A3CB-06A-11D-A196-08	SKCM
MAP2K1	p.P124S	Both	Preclinical	BRAF inhibitors in BRAF mutant tumor	Clinical Trials	BRAF inhibitors	missense	TCGA-BF-A3DN-01A-11D-A20D-08	SKCM
BRAF	p.V600E	Both	FDA Approved	vemurafenib, dabrafenib, trametinib, dabrafenib + trametinib	Clinical Trials	cetuximab, panitumumab	missense	TCGA-BF-A3DN-01A-11D-A20D-08	SKCM
BRAF	p.V600E	Both	FDA Approved	vemurafenib, dabrafenib, trametinib, dabrafenib + trametinib	Clinical Trials	cetuximab, panitumumab	missense	TCGA-EL-A3CP-01A-11D-A19J-08	THCA
NRAS	p.Q61L	Both	Clinical Trials	MEK inhibitors	FDA Approved	cetuximab, panitumumab	missense	TCGA-38-4632-01A-01D-1753-08	LUAD
BRCA2	p.E49*	Sensitive	FDA Approved	PARP inhibitors	NA	NA	nonsense	TCGA-AG-A002-01A-01W-A005-10	COADREAD
FGFR2	p.R550W	Both	Case Reports	ponatinib	Preclinical	dovitinib	missense	TCGA-AG-A002-01A-01W-A005-10	COADREAD
PIK3CA	p.H1047R	Sensitive	Clinical Trials	PI3K/AKT/mTOR inhibitors	NA	NA	missense	TCGA-A7-A0CG-01A-11W-A019-09	BRCA
KRAS	p.G12C	Both	Clinical Trials	MEK inhibitors	FDA Approved	panitumumab	missense	TCGA-49-4505-01A-01D-1931-08	LUAD
AKT1	p.E17K	Sensitive	Clinical Trials	AKT inhibitors	NA	NA	missense	TCGA-EW-A1IY-01A-11D-A188-09	BRCA
BRAF	p.V600E	Both	FDA Approved	vemurafenib, dabrafenib, trametinib, dabrafenib + trametinib	Clinical Trials	cetuximab, panitumumab	missense	TCGA-DJ-A3VF-01A-11D-A23M-08	THCA
BRAF	p.V600E	Both	FDA Approved	vemurafenib, dabrafenib, trametinib, dabrafenib + trametinib	Clinical Trials	cetuximab, panitumumab	missense	TCGA-EM-A4FO-01A-11D-A257-08	THCA
PIK3CA	p.E545K	Sensitive	Case Reports	mTOR inhibitors	NA	NA	missense	TCGA-BR-6706-01A-11D-1882-08	STAD
PIK3CA	p.H1047R	Sensitive	Clinical Trials	PI3K/AKT/mTOR inhibitors	NA	NA	missense	TCGA-AH-6903-01A-11D-1924-10	COADREAD
KRAS	p.G12A	Both	Clinical Trials	MEK inhibitors	FDA Approved	panitumumab	missense	TCGA-AH-6903-01A-11D-1924-10	COADREAD
BRAF	p.G466V	Sensitive	Case Reports	dasatinib	NA	NA	missense	TCGA-DM-A1D7-01A-11D-A152-10	COADREAD
KRAS	p.A146V	Both	Case Reports	MEK inhibitors + PI3K pathway inhibitors	Clinical Trials	cetuximab, panitumumab	missense	TCGA-DM-A1D7-01A-11D-A152-10	COADREAD
NOTCH1	p.A2251T	Sensitive	Clinical Trials	steroids early setting	NA	NA	missense	TCGA-A4-8098-01A-11D-2396-08	KIRP
NOTCH2	p.Q2285K	Sensitive	Case Reports	Gamma secretase inhibitors	NA	NA	missense	TCGA-FS-A1Z4-06A-11D-A197-08	SKCM
EGFR	p.A289V	Sensitive	Case Reports	erlotinib	NA	NA	missense	TCGA-32-1970-01A-01D-1494-08	GBM
KRAS	p.G12D	Both	Clinical Trials	MEK inhibitors	FDA Approved	panitumumab	missense	TCGA-D1-A16F-01A-11D-A12J-09	UCEC
BRAF	p.V600E	Both	FDA Approved	vemurafenib, dabrafenib, trametinib, dabrafenib + trametinib	Clinical Trials	cetuximab, panitumumab	missense	TCGA-E8-A2EA-01A-11D-A17V-08	THCA
BRAF	p.V600E	Both	FDA Approved	vemurafenib, dabrafenib, trametinib, dabrafenib + trametinib	Clinical Trials	cetuximab, panitumumab	missense	TCGA-ET-A39P-01A-21D-A19J-08	THCA
KRAS	p.G12V	Both	Clinical Trials	MEK inhibitors	FDA Approved	panitumumab	missense	TCGA-05-4427-01A-21D-1855-08	LUAD
EGFR	p.LRE747in_frame_del	Sensitive	FDA Approved	erlotinib, afatinib	NA	NA	in_frame_del	TCGA-75-6212-01A-11D-1753-08	LUAD
KRAS	p.G12V	Both	Clinical Trials	MEK inhibitors	FDA Approved	panitumumab	missense	TCGA-EM-A2CQ-01A-11D-A17V-08	THCA
MTOR	p.S2215Y	Sensitive	Case Reports	rapamycin	NA	NA	missense	TCGA-CJ-5679	KIRC
KRAS	p.G12C	Both	Clinical Trials	MEK inhibitors	FDA Approved	panitumumab	missense	TCGA-91-8497-01A-11D-2393-08	LUAD
KRAS	p.G12D	Both	Clinical Trials	MEK inhibitors	FDA Approved	panitumumab	missense	TCGA-55-A494-01A-11D-A24P-08	LUAD
NRAS	p.Q61K	Both	Clinical Trials	MEK inhibitors	FDA Approved	cetuximab, panitumumab	missense	TCGA-EE-A2GL-06A-11D-A196-08	SKCM
NRAS	p.Q61R	Both	Clinical Trials	MEK inhibitors	FDA Approved	cetuximab, panitumumab	missense	TCGA-BJ-A2N8-01A-11D-A18F-08	THCA
PIK3CA	p.E542K	Sensitive	Case Reports	mTOR inhibitors	NA	NA	missense	TCGA-A2-A0EO-01A-11W-A050-09	BRCA
PIK3CA	p.H1047R	Sensitive	Clinical Trials	PI3K/AKT/mTOR inhibitors	NA	NA	missense	TCGA-F4-6855-01A-11D-1924-10	COADREAD
KRAS	p.G12V	Both	Clinical Trials	MEK inhibitors	FDA Approved	panitumumab	missense	TCGA-F4-6855-01A-11D-1924-10	COADREAD
NRAS	p.Q61K	Both	Clinical Trials	MEK inhibitors	FDA Approved	cetuximab, panitumumab	missense	TCGA-EE-A2MF-06A-11D-A21A-08	SKCM
BRAF	p.V600E	Both	FDA Approved	vemurafenib, dabrafenib, trametinib, dabrafenib + trametinib	Clinical Trials	cetuximab, panitumumab	missense	TCGA-FE-A231-01A-11D-A14W-08	THCA
KRAS	p.G12D	Both	Clinical Trials	MEK inhibitors	FDA Approved	panitumumab	missense	TCGA-BM-6198-01A-11D-1733-10	COADREAD
ERBB2	p.S310F	Sensitive	Case Reports	ERBB2 TKIs, trastuzumab	NA	NA	missense	TCGA-GC-A3YS-01A-11D-A23M-08	BLCA
KRAS	p.G12D	Both	Clinical Trials	MEK inhibitors	FDA Approved	panitumumab	missense	TCGA-EI-6510-01A-11D-1733-10	COADREAD
BRCA2	p.Q3026*	Sensitive	FDA Approved	PARP inhibitors	NA	NA	nonsense	TCGA-ER-A194-01A-11D-A197-08	SKCM
PIK3CA	p.E545K	Sensitive	Case Reports	mTOR inhibitors	NA	NA	missense	TCGA-95-7948-01A-11D-2184-08	LUAD
NRAS	p.Q61R	Both	Clinical Trials	MEK inhibitors	FDA Approved	cetuximab, panitumumab	missense	TCGA-ER-A2NH-06A-11D-A196-08	SKCM
IDH1	p.R132H	Sensitive	Case Reports	IDH1 inhibitor	NA	NA	missense	TCGA-DU-5872-01A-11D-1705-08	LGG
PIK3CA	p.H1047R	Sensitive	Clinical Trials	PI3K/AKT/mTOR inhibitors	NA	NA	missense	TCGA-N6-A4VD-01A-11D-A28R-08	UCS
KRAS	p.G12V	Both	Clinical Trials	MEK inhibitors	FDA Approved	panitumumab	missense	TCGA-A6-6650-01A-11D-1771-10	COADREAD
PIK3CA	p.E542K	Sensitive	Case Reports	mTOR inhibitors	NA	NA	missense	TCGA-CV-6955-01A-11D-2012-08	HNSC
PIK3CA	p.H1047R	Sensitive	Clinical Trials	PI3K/AKT/mTOR inhibitors	NA	NA	missense	TCGA-CN-5373-01A-01D-1434-08	HNSC
PIK3CA	p.E542K	Sensitive	Case Reports	mTOR inhibitors	NA	NA	missense	TCGA-A6-4105-01A-02D-1771-10	COADREAD
MTOR	p.Q2223K	Sensitive	Preclinical	everolimus	NA	NA	missense	TCGA-A6-4105-01A-02D-1771-10	COADREAD
KRAS	p.G12V	Both	Clinical Trials	MEK inhibitors	FDA Approved	panitumumab	missense	TCGA-A6-4105-01A-02D-1771-10	COADREAD
KIT	p.K642E	Sensitive	FDA Approved	imatinib	NA	NA	missense	TCGA-EB-A42Y-01A-12D-A24R-08	SKCM
KRAS	p.G12V	Both	Clinical Trials	MEK inhibitors	FDA Approved	panitumumab	missense	TCGA-93-8067-01A-11D-2284-08	LUAD
IDH2	p.R140Q	Sensitive	Clinical Trials	IDH2 inhibitor	NA	NA	missense	TCGA-QK-A6VB-01A-12D-A34J-08	HNSC
EGFR	p.ELREA746in_frame_del	Sensitive	FDA Approved	erlotinib, afatinib	NA	NA	in_frame_del	TCGA-J2-8192-01A-11D-2238-08	LUAD
PIK3CA	p.H1047R	Sensitive	Clinical Trials	PI3K/AKT/mTOR inhibitors	NA	NA	missense	TCGA-DM-A28M-01A-12D-A16V-10	COADREAD
KRAS	p.G12V	Both	Clinical Trials	MEK inhibitors	FDA Approved	panitumumab	missense	TCGA-DM-A28M-01A-12D-A16V-10	COADREAD
IDH1	p.R132H	Sensitive	Case Reports	IDH1 inhibitor	NA	NA	missense	TCGA-DB-5274-01A-01D-1468-08	LGG
BRAF	p.V600E	Both	FDA Approved	vemurafenib, dabrafenib, trametinib, dabrafenib + trametinib	Clinical Trials	cetuximab, panitumumab	missense	TCGA-E8-A419-01A-11D-A23M-08	THCA
BRAF	p.V600E	Both	FDA Approved	vemurafenib, dabrafenib, trametinib, dabrafenib + trametinib	Clinical Trials	cetuximab, panitumumab	missense	TCGA-DJ-A4UL-01A-11D-A257-08	THCA
PIK3CA	p.E545K	Sensitive	Case Reports	mTOR inhibitors	NA	NA	missense	TCGA-N6-A4VF-01A-31D-A28R-08	UCS
NOTCH1	p.E159K	Sensitive	Clinical Trials	steroids early setting	NA	NA	missense	TCGA-F4-6703-01A-11D-1835-10	COADREAD
KRAS	p.G12D	Both	Clinical Trials	MEK inhibitors	FDA Approved	panitumumab	missense	TCGA-F4-6703-01A-11D-1835-10	COADREAD
NRAS	p.Q61K	Both	Clinical Trials	MEK inhibitors	FDA Approved	cetuximab, panitumumab	missense	TCGA-EM-A22Q-01A-11D-A17V-08	THCA
BRAF	p.V600E	Both	FDA Approved	vemurafenib, dabrafenib, trametinib, dabrafenib + trametinib	Clinical Trials	cetuximab, panitumumab	missense	TCGA-ET-A2MY-01A-11D-A18F-08	THCA
PIK3CA	p.H1047R	Sensitive	Clinical Trials	PI3K/AKT/mTOR inhibitors	NA	NA	missense	TCGA-27-2527-01A-01D-1494-08	GBM
PIK3CA	p.H1047R	Sensitive	Clinical Trials	PI3K/AKT/mTOR inhibitors	NA	NA	missense	TCGA-B6-A0IE-01A-11W-A050-09	BRCA
PIK3CA	p.E545K	Sensitive	Case Reports	mTOR inhibitors	NA	NA	missense	TCGA-DM-A0X9-01A-11D-A152-10	COADREAD
KRAS	p.G13D	Both	Clinical Trials	cetuximab	FDA Approved	panitumumab	missense	TCGA-DM-A0X9-01A-11D-A152-10	COADREAD
PDGFRA	p.E59K	Sensitive	Clinical Trials	imatinib	NA	NA	missense	TCGA-FW-A3R5-06A-11D-A23B-08	SKCM
BRAF	p.G469E	Sensitive	Case Reports	sorafenib	NA	NA	missense	TCGA-FW-A3R5-06A-11D-A23B-08	SKCM
MTOR	p.S2215Y	Sensitive	Case Reports	rapamycin	NA	NA	missense	TCGA-FU-A3HZ-01A-11D-A20U-09	CESC
EGFR	p.G598V	Sensitive	Case Reports	erlotinib	NA	NA	missense	TCGA-06-0174-01A-01D-1491-08	GBM
BRAF	p.V600E	Both	FDA Approved	vemurafenib, dabrafenib, trametinib, dabrafenib + trametinib	Clinical Trials	cetuximab, panitumumab	missense	TCGA-EM-A4FV-01A-11D-A257-08	THCA
KRAS	p.Q61K	Both	Clinical Trials	MEK inhibitors	FDA Approved	panitumumab	missense	TCGA-EM-A4FV-01A-11D-A257-08	THCA
BRAF	p.V600E	Both	FDA Approved	vemurafenib, dabrafenib, trametinib, dabrafenib + trametinib	Clinical Trials	cetuximab, panitumumab	missense	TCGA-EL-A3CL-01A-11D-A19J-08	THCA
SF3B1	p.K700E	Sensitive	Case Reports	spliceosome inhibitor	NA	NA	missense	TCGA-BH-A201-01A-11D-A14K-09	BRCA
PIK3CA	p.E545K	Sensitive	Case Reports	mTOR inhibitors	NA	NA	missense	TCGA-CV-7410-01A-21D-2078-08	HNSC
PIK3CA	p.E545K	Sensitive	Case Reports	mTOR inhibitors	NA	NA	missense	TCGA-A2-A0SY-01A-31D-A099-09	BRCA
BRAF	p.V600E	Both	FDA Approved	vemurafenib, dabrafenib, trametinib, dabrafenib + trametinib	Clinical Trials	cetuximab, panitumumab	missense	TCGA-EE-A2GS-06A-12D-A197-08	SKCM
IDH1	p.R132H	Sensitive	Case Reports	IDH1 inhibitor	NA	NA	missense	TCGA-E1-5305-01A-01D-1893-08	LGG
EGFR	p.R108K	Sensitive	Case Reports	erlotinib	NA	NA	missense	TCGA-06-2565-01A-01D-1494-08	GBM
BRAF	p.V600E	Both	FDA Approved	vemurafenib, dabrafenib, trametinib, dabrafenib + trametinib	Clinical Trials	cetuximab, panitumumab	missense	TCGA-DJ-A13L-01A-11D-A21Z-08	THCA
EGFR	p.G598V	Sensitive	Case Reports	erlotinib	NA	NA	missense	TCGA-28-5213-01A-01D-1486-08	GBM
PIK3CA	p.H1047R	Sensitive	Clinical Trials	PI3K/AKT/mTOR inhibitors	NA	NA	missense	TCGA-A8-A096-01A-11W-A019-09	BRCA
BRAF	p.V600E	Both	FDA Approved	vemurafenib, dabrafenib, trametinib, dabrafenib + trametinib	Clinical Trials	cetuximab, panitumumab	missense	TCGA-D3-A1Q7-06A-11D-A19A-08	SKCM
EGFR	p.L858R	Sensitive	FDA Approved	erlotinib, afatinib	NA	NA	missense	TCGA-67-6217-01A-11D-1753-08	LUAD
PIK3CA	p.E545K	Sensitive	Case Reports	mTOR inhibitors	NA	NA	missense	TCGA-AC-A2B8-01A-11D-A17D-09	BRCA
KRAS	p.G12A	Both	Clinical Trials	MEK inhibitors	FDA Approved	panitumumab	missense	TCGA-69-7980-01A-11D-2184-08	LUAD
BRAF	p.V600E	Both	FDA Approved	vemurafenib, dabrafenib, trametinib, dabrafenib + trametinib	Clinical Trials	cetuximab, panitumumab	missense	TCGA-H2-A26U-01A-11D-A16O-08	THCA
BRAF	p.V600E	Both	FDA Approved	vemurafenib, dabrafenib, trametinib, dabrafenib + trametinib	Clinical Trials	cetuximab, panitumumab	missense	TCGA-EB-A430-01A-11D-A24R-08	SKCM
FLT3	p.D835Y	Both	Preclinical	lestaurtinib	Case Reports	sorafenib	missense	TCGA-AB-2900-03A-01W-0733-08	LAML
KRAS	p.G12V	Both	Clinical Trials	MEK inhibitors	FDA Approved	panitumumab	missense	TCGA-EI-7002-01A-11D-1924-10	COADREAD
BRAF	p.V600E	Both	FDA Approved	vemurafenib, dabrafenib, trametinib, dabrafenib + trametinib	Clinical Trials	cetuximab, panitumumab	missense	TCGA-EL-A3N2-01A-11D-A20C-08	THCA
KRAS	p.G12C	Both	Clinical Trials	MEK inhibitors	FDA Approved	panitumumab	missense	TCGA-93-7347-01A-11D-2184-08	LUAD
KRAS	p.G12D	Both	Clinical Trials	MEK inhibitors	FDA Approved	panitumumab	missense	TCGA-B5-A11M-01A-11D-A122-09	UCEC
EGFR	p.L858R	Sensitive	FDA Approved	erlotinib, afatinib	NA	NA	missense	TCGA-64-1681-01A-11D-2063-08	LUAD
IDH2	p.R172K	Sensitive	Clinical Trials	IDH2 inhibitor	NA	NA	missense	TCGA-AB-2821-03B-01W-0728-08	LAML
BRAF	p.V600E	Both	FDA Approved	vemurafenib, dabrafenib, trametinib, dabrafenib + trametinib	Clinical Trials	cetuximab, panitumumab	missense	TCGA-D3-A2JA-06A-11D-A196-08	SKCM
ERBB4	p.E872K	Sensitive	Case Reports	lapatinib	NA	NA	missense	TCGA-D3-A2JA-06A-11D-A196-08	SKCM
IDH1	p.R132H	Sensitive	Case Reports	IDH1 inhibitor	NA	NA	missense	TCGA-DB-5278-01A-01D-1468-08	LGG
PIK3CA	p.H1047R	Sensitive	Clinical Trials	PI3K/AKT/mTOR inhibitors	NA	NA	missense	TCGA-BR-4361-01A-01D-1158-08	STAD
BRCA2	p.K3416fs	Sensitive	FDA Approved	PARP inhibitors	NA	NA	frame_shift_del_unspecified	TCGA-BR-4361-01A-01D-1158-08	STAD
KIT	p.V560A	Sensitive	FDA Approved	imatinib, sunitinib, regorafenib	NA	NA	missense	TCGA-BR-4361-01A-01D-1158-08	STAD
KRAS	p.A146T	Both	Case Reports	MEK inhibitors + PI3K pathway inhibitors	Clinical Trials	cetuximab, panitumumab	missense	TCGA-BR-4361-01A-01D-1158-08	STAD
BRCA1	p.D1108fs	Sensitive	FDA Approved	PARP inhibitors	NA	NA	frame_shift_del_unspecified	TCGA-24-1846	OV
BRCA1	p.E111*	Sensitive	FDA Approved	PARP inhibitors	NA	NA	nonsense	TCGA-24-1847	OV
FGFR2	p.P253R	Sensitive	Preclinical	pazopanib	NA	NA	missense	TCGA-23-1809	OV
BRCA1	p.*355	Sensitive	FDA Approved	PARP inhibitors	NA	NA	nonsense	TCGA-BT-A3PH-01A-11D-A21Z-08	BLCA
FGFR2	p.S252W	Sensitive	Case Reports	FGFR inhibitors	NA	NA	missense	TCGA-N7-A4Y0-01A-12D-A28R-08	UCS
BRAF	p.V600E	Both	FDA Approved	vemurafenib, dabrafenib, trametinib, dabrafenib + trametinib	Clinical Trials	cetuximab, panitumumab	missense	TCGA-EL-A3ZT-01A-12D-A23M-08	THCA
NRAS	p.Q61R	Both	Clinical Trials	MEK inhibitors	FDA Approved	cetuximab, panitumumab	missense	TCGA-FY-A3NP-01A-11D-A21A-08	THCA
KRAS	p.G13D	Both	Clinical Trials	cetuximab	FDA Approved	panitumumab	missense	TCGA-BR-4267-01A-01D-1126-08	STAD
IDH1	p.R132H	Sensitive	Case Reports	IDH1 inhibitor	NA	NA	missense	TCGA-IK-7675-01A-11D-2086-08	LGG
KRAS	p.Q61P	Both	Clinical Trials	MEK inhibitors	FDA Approved	panitumumab	missense	TCGA-F4-6805-01A-11D-1835-10	COADREAD
NOTCH2	p.T2097S	Sensitive	Case Reports	Gamma secretase inhibitors	NA	NA	missense	TCGA-17-Z030-01A-01W-0746-08	LUAD
PIK3CA	p.E542K	Sensitive	Case Reports	mTOR inhibitors	NA	NA	missense	TCGA-DB-A64W-01A-11D-A29Q-08	LGG
IDH1	p.R132H	Sensitive	Case Reports	IDH1 inhibitor	NA	NA	missense	TCGA-DB-A64W-01A-11D-A29Q-08	LGG
EGFR	p.L858R	Sensitive	FDA Approved	erlotinib, afatinib	NA	NA	missense	TCGA-86-8668-01A-11D-2393-08	LUAD
PIK3CA	p.E545K	Sensitive	Case Reports	mTOR inhibitors	NA	NA	missense	TCGA-MY-A5BE-01A-21D-A26G-09	CESC
PIK3CA	p.E542K	Sensitive	Case Reports	mTOR inhibitors	NA	NA	missense	TCGA-A5-A0VQ-01A-11D-A10B-09	UCEC
NRAS	p.G12D	Both	Case Reports	MEK inhibitors	FDA Approved	cetuximab, panitumumab	missense	TCGA-A5-A0VQ-01A-11D-A10B-09	UCEC
IDH1	p.R132H	Sensitive	Case Reports	IDH1 inhibitor	NA	NA	missense	TCGA-HW-A5KL-01A-11D-A27K-08	LGG
KRAS	p.G12A	Both	Clinical Trials	MEK inhibitors	FDA Approved	panitumumab	missense	TCGA-73-4677-01A-01D-1265-08	LUAD
KRAS	p.G12D	Both	Clinical Trials	MEK inhibitors	FDA Approved	panitumumab	missense	TCGA-DM-A282-01A-12D-A16V-10	COADREAD
BRAF	p.V600E	Both	FDA Approved	vemurafenib, dabrafenib, trametinib, dabrafenib + trametinib	Clinical Trials	cetuximab, panitumumab	missense	TCGA-FW-A5DY-06A-11D-A30X-08	SKCM
PDGFRA	p.R822L	Sensitive	Clinical Trials	imatinib	NA	NA	missense	TCGA-55-8506-01A-11D-2393-08	LUAD
PDGFRA	p.R822C	Sensitive	Clinical Trials	imatinib	NA	NA	missense	TCGA-55-8506-01A-11D-2393-08	LUAD
EGFR	p.L858R	Sensitive	FDA Approved	erlotinib, afatinib	NA	NA	missense	TCGA-55-8506-01A-11D-2393-08	LUAD
NOTCH1	p.M2362I	Sensitive	Clinical Trials	steroids early setting	NA	NA	missense	TCGA-55-A490-01A-11D-A24D-08	LUAD
KRAS	p.G12C	Both	Clinical Trials	MEK inhibitors	FDA Approved	panitumumab	missense	TCGA-55-A490-01A-11D-A24D-08	LUAD
BRAF	p.V600E	Both	FDA Approved	vemurafenib, dabrafenib, trametinib, dabrafenib + trametinib	Clinical Trials	cetuximab, panitumumab	missense	TCGA-EL-A3ZQ-01A-11D-A23M-08	THCA
BRAF	p.V600E	Both	FDA Approved	vemurafenib, dabrafenib, trametinib, dabrafenib + trametinib	Clinical Trials	cetuximab, panitumumab	missense	TCGA-DJ-A2PR-01A-11D-A19J-08	THCA
PIK3CA	p.H1047R	Sensitive	Clinical Trials	PI3K/AKT/mTOR inhibitors	NA	NA	missense	TCGA-A2-A0CS-01A-11D-A10Y-09	BRCA
IDH1	p.R132H	Sensitive	Case Reports	IDH1 inhibitor	NA	NA	missense	TCGA-DB-A64U-01A-11D-A29Q-08	LGG
PIK3CA	p.E545K	Sensitive	Case Reports	mTOR inhibitors	NA	NA	missense	TCGA-22-4613-01A-01D-1441-08	LUSC
IDH1	p.R132H	Sensitive	Case Reports	IDH1 inhibitor	NA	NA	missense	TCGA-DU-7301-01A-11D-2086-08	LGG
KRAS	p.G12V	Both	Clinical Trials	MEK inhibitors	FDA Approved	panitumumab	missense	TCGA-44-7661-01A-11D-2063-08	LUAD
IDH1	p.R132H	Sensitive	Case Reports	IDH1 inhibitor	NA	NA	missense	TCGA-HW-7487-01A-11D-2024-08	LGG
KRAS	p.G12C	Both	Clinical Trials	MEK inhibitors	FDA Approved	panitumumab	missense	TCGA-55-1595-01A-01D-0969-08	LUAD
IDH1	p.R132H	Sensitive	Case Reports	IDH1 inhibitor	NA	NA	missense	TCGA-FG-6690-01A-11D-1893-08	LGG
KRAS	p.G12V	Both	Clinical Trials	MEK inhibitors	FDA Approved	panitumumab	missense	TCGA-05-4433-01A-22D-1855-08	LUAD
BRAF	p.V600E	Both	FDA Approved	vemurafenib, dabrafenib, trametinib, dabrafenib + trametinib	Clinical Trials	cetuximab, panitumumab	missense	TCGA-06-0151-01A-01D-1491-08	GBM
MAP2K1	p.P124S	Both	Preclinical	BRAF inhibitors in BRAF mutant tumor	Clinical Trials	BRAF inhibitors	missense	TCGA-EE-A2M5-06A-12D-A197-08	SKCM
BRAF	p.V600E	Both	FDA Approved	vemurafenib, dabrafenib, trametinib, dabrafenib + trametinib	Clinical Trials	cetuximab, panitumumab	missense	TCGA-EE-A2M5-06A-12D-A197-08	SKCM
NOTCH2	p.P2274L	Sensitive	Case Reports	Gamma secretase inhibitors	NA	NA	missense	TCGA-EE-A2M5-06A-12D-A197-08	SKCM
PIK3CA	p.E545K	Sensitive	Case Reports	mTOR inhibitors	NA	NA	missense	TCGA-D8-A1JD-01A-11D-A13L-09	BRCA
PIK3CA	p.H1047R	Sensitive	Clinical Trials	PI3K/AKT/mTOR inhibitors	NA	NA	missense	TCGA-BH-A202-01A-11D-A14K-09	BRCA
CTNNB1	p.D32V	Sensitive	Clinical Trials	everolimus + letrozole	NA	NA	missense	TCGA-DD-A73E-01A-12D-A32G-10	LIHC
NRAS	p.Q61K	Both	Clinical Trials	MEK inhibitors	FDA Approved	cetuximab, panitumumab	missense	TCGA-AB-2892-03A-01W-0733-08	LAML
PIK3CA	p.E545K	Sensitive	Case Reports	mTOR inhibitors	NA	NA	missense	TCGA-E9-A1R4-01A-21D-A14G-09	BRCA
KRAS	p.G12D	Both	Clinical Trials	MEK inhibitors	FDA Approved	panitumumab	missense	TCGA-78-7160-01A-11D-2036-08	LUAD
NRAS	p.Q61R	Both	Clinical Trials	MEK inhibitors	FDA Approved	cetuximab, panitumumab	missense	TCGA-EE-A3J7-06A-11D-A20D-08	SKCM
BRAF	p.V600E	Both	FDA Approved	vemurafenib, dabrafenib, trametinib, dabrafenib + trametinib	Clinical Trials	cetuximab, panitumumab	missense	TCGA-EL-A3CU-01A-11D-A19J-08	THCA
BRAF	p.V600E	Both	FDA Approved	vemurafenib, dabrafenib, trametinib, dabrafenib + trametinib	Clinical Trials	cetuximab, panitumumab	missense	TCGA-EE-A2M8-06A-12D-A196-08	SKCM
KRAS	p.G12V	Both	Clinical Trials	MEK inhibitors	FDA Approved	panitumumab	missense	TCGA-44-6146-01A-11D-1753-08	LUAD
IDH1	p.R132H	Sensitive	Case Reports	IDH1 inhibitor	NA	NA	missense	TCGA-14-1456-01B-01D-1494-08	GBM
EGFR	p.A289V	Sensitive	Case Reports	erlotinib	NA	NA	missense	TCGA-14-1456-01B-01D-1494-08	GBM
BRCA2	p.E1120*	Sensitive	FDA Approved	PARP inhibitors	NA	NA	nonsense	TCGA-97-8172-01A-11D-2284-08	LUAD
NRAS	p.Q61R	Both	Clinical Trials	MEK inhibitors	FDA Approved	cetuximab, panitumumab	missense	TCGA-EE-A29X-06A-11D-A196-08	SKCM
NRAS	p.Q61K	Both	Clinical Trials	MEK inhibitors	FDA Approved	cetuximab, panitumumab	missense	TCGA-ET-A25I-01A-11D-A16O-08	THCA
PIK3CA	p.E545K	Sensitive	Case Reports	mTOR inhibitors	NA	NA	missense	TCGA-E9-A1NG-01A-21D-A14K-09	BRCA
KRAS	p.G12V	Both	Clinical Trials	MEK inhibitors	FDA Approved	panitumumab	missense	TCGA-E9-A1NG-01A-21D-A14K-09	BRCA
EGFR	p.S768I	Sensitive	FDA Approved	erlotinib, afatinib	NA	NA	missense	TCGA-44-A4SU-01A-11D-A24P-08	LUAD
EGFR	p.G719C	Sensitive	FDA Approved	erlotinib, afatinib	NA	NA	missense	TCGA-44-A4SU-01A-11D-A24P-08	LUAD
BRAF	p.V600R	Sensitive	FDA Approved	dabrafenib, RAF inhibitor	NA	NA	missense	TCGA-EB-A3XC-01A-11D-A23B-08	SKCM
BRCA2	p.N1784fs	Sensitive	FDA Approved	PARP inhibitors	NA	NA	frame_shift_del_unspecified	TCGA-D7-A4YT-01A-11D-A25D-08	STAD
BRAF	p.V600E	Both	FDA Approved	vemurafenib, dabrafenib, trametinib, dabrafenib + trametinib	Clinical Trials	cetuximab, panitumumab	missense	TCGA-FR-A44A-06A-11D-A24R-08	SKCM
KRAS	p.G12C	Both	Clinical Trials	MEK inhibitors	FDA Approved	panitumumab	missense	TCGA-MP-A4TD-01A-32D-A25L-08	LUAD
NRAS	p.Q61R	Both	Clinical Trials	MEK inhibitors	FDA Approved	cetuximab, panitumumab	missense	TCGA-AF-6136-01A-11D-1826-10	COADREAD
ERBB2	p.V842I	Sensitive	Case Reports	lapatinib, neratinib	NA	NA	missense	TCGA-AG-3599-01A-02W-0833-10	COADREAD
BRAF	p.V600E	Both	FDA Approved	vemurafenib, dabrafenib, trametinib, dabrafenib + trametinib	Clinical Trials	cetuximab, panitumumab	missense	TCGA-EM-A3FJ-01A-11D-A21A-08	THCA
BRAF	p.V600E	Both	FDA Approved	vemurafenib, dabrafenib, trametinib, dabrafenib + trametinib	Clinical Trials	cetuximab, panitumumab	missense	TCGA-D3-A2J7-06A-11D-A196-08	SKCM
IDH2	p.R140Q	Sensitive	Clinical Trials	IDH2 inhibitor	NA	NA	missense	TCGA-AB-2807-03D-01W-0755-09	LAML
IDH1	p.R132H	Sensitive	Case Reports	IDH1 inhibitor	NA	NA	missense	TCGA-HT-7485-01A-11D-2024-08	LGG
PIK3CA	p.E542K	Sensitive	Case Reports	mTOR inhibitors	NA	NA	missense	TCGA-TN-A7HI-01A-11D-A34J-08	HNSC
IDH1	p.R132H	Sensitive	Case Reports	IDH1 inhibitor	NA	NA	missense	TCGA-DB-A4XH-01A-11D-A27K-08	LGG
BRAF	p.V600E	Both	FDA Approved	vemurafenib, dabrafenib, trametinib, dabrafenib + trametinib	Clinical Trials	cetuximab, panitumumab	missense	TCGA-KS-A41J-01A-11D-A23M-08	THCA
BRCA1	p.P105fs	Sensitive	FDA Approved	PARP inhibitors	NA	NA	frame_shift_del_unspecified	TCGA-D8-A27M-01A-11D-A16D-09	BRCA
BRAF	p.V600E	Both	FDA Approved	vemurafenib, dabrafenib, trametinib, dabrafenib + trametinib	Clinical Trials	cetuximab, panitumumab	missense	TCGA-DJ-A3UR-01A-11D-A22D-08	THCA
ERBB2	p.D769Y	Sensitive	Case Reports	trastuzumab, lapatinib, neratinib	NA	NA	missense	TCGA-E9-A1R5-01A-11D-A14K-09	BRCA
PIK3CA	p.E545K	Sensitive	Case Reports	mTOR inhibitors	NA	NA	missense	TCGA-DS-A5RQ-01A-11D-A28B-09	CESC
KRAS	p.G13C	Both	Clinical Trials	MEK inhibitors	FDA Approved	panitumumab	missense	TCGA-86-8674-01A-21D-2393-08	LUAD
KRAS	p.G12D	Both	Clinical Trials	MEK inhibitors	FDA Approved	panitumumab	missense	TCGA-AF-4110-01A-02D-1733-10	COADREAD
EGFR	p.KANKEI754in_frame_del	Sensitive	FDA Approved	Afatinib	NA	NA	in_frame_del	TCGA-50-6591-01A-11D-1753-08	LUAD
EGFR	p.G598V	Sensitive	Case Reports	erlotinib	NA	NA	missense	TCGA-28-1747-01C-01D-1494-08	GBM
NRAS	p.Q61R	Both	Clinical Trials	MEK inhibitors	FDA Approved	cetuximab, panitumumab	missense	TCGA-RP-A695-06A-11D-A30X-08	SKCM
KRAS	p.A146T	Both	Case Reports	MEK inhibitors + PI3K pathway inhibitors	Clinical Trials	cetuximab, panitumumab	missense	TCGA-AD-6964-01A-11D-1924-10	COADREAD
BRAF	p.V600E	Both	FDA Approved	vemurafenib, dabrafenib, trametinib, dabrafenib + trametinib	Clinical Trials	cetuximab, panitumumab	missense	TCGA-EL-A3CM-01A-11D-A19J-08	THCA
HRAS	p.G12C	Sensitive	Case Reports	mTOR inhibitors	NA	NA	missense	TCGA-CV-7183-01A-11D-2012-08	HNSC
PIK3CA	p.E545K	Sensitive	Case Reports	mTOR inhibitors	NA	NA	missense	TCGA-CQ-6219-01A-11D-1912-08	HNSC
BRAF	p.V600E	Both	FDA Approved	vemurafenib, dabrafenib, trametinib, dabrafenib + trametinib	Clinical Trials	cetuximab, panitumumab	missense	TCGA-EL-A3GU-01A-11D-A21A-08	THCA
NRAS	p.Q61R	Both	Clinical Trials	MEK inhibitors	FDA Approved	cetuximab, panitumumab	missense	TCGA-EL-A4K2-01A-11D-A257-08	THCA
PIK3CA	p.E545K	Sensitive	Case Reports	mTOR inhibitors	NA	NA	missense	TCGA-GM-A3NY-01A-11D-A21Q-09	BRCA
BRAF	p.V600E	Both	FDA Approved	vemurafenib, dabrafenib, trametinib, dabrafenib + trametinib	Clinical Trials	cetuximab, panitumumab	missense	TCGA-DJ-A1QI-01A-11D-A14W-08	THCA
KRAS	p.G12V	Both	Clinical Trials	MEK inhibitors	FDA Approved	panitumumab	missense	TCGA-AM-5821-01A-01D-1650-10	COADREAD
BRAF	p.V600E	Both	FDA Approved	vemurafenib, dabrafenib, trametinib, dabrafenib + trametinib	Clinical Trials	cetuximab, panitumumab	missense	TCGA-DJ-A2Q5-01A-11D-A18F-08	THCA
PIK3CA	p.E545K	Sensitive	Case Reports	mTOR inhibitors	NA	NA	missense	TCGA-BS-A0TG-01A-32D-A10B-09	UCEC
KRAS	p.G13C	Both	Clinical Trials	MEK inhibitors	FDA Approved	panitumumab	missense	TCGA-BS-A0TG-01A-32D-A10B-09	UCEC
PIK3CA	p.E545K	Sensitive	Case Reports	mTOR inhibitors	NA	NA	missense	TCGA-EJ-8469-01A-11D-2395-08	PRAD
KRAS	p.G12C	Both	Clinical Trials	MEK inhibitors	FDA Approved	panitumumab	missense	TCGA-95-7562-01A-11D-2238-08	LUAD
KRAS	p.G13C	Both	Clinical Trials	MEK inhibitors	FDA Approved	panitumumab	missense	TCGA-17-Z017-01A-01W-0746-08	LUAD
PIK3CA	p.E542K	Sensitive	Case Reports	mTOR inhibitors	NA	NA	missense	TCGA-HD-7754-01A-11D-2078-08	HNSC
FLT3	p.D835Y	Both	Preclinical	lestaurtinib	Case Reports	sorafenib	missense	TCGA-AB-2851-03B-01W-0728-08	LAML
KIT	p.G812V	Both	Preclinical	sorafenib	Clinical Trials	imatinib	missense	TCGA-BB-7870-01A-11D-2229-08	HNSC
KRAS	p.G12D	Both	Clinical Trials	MEK inhibitors	FDA Approved	panitumumab	missense	TCGA-BR-7703-01A-11D-2053-08	STAD
NOTCH2	p.R2105L	Sensitive	Case Reports	Gamma secretase inhibitors	NA	NA	missense	TCGA-05-4424-01A-22D-1855-08	LUAD
IDH1	p.R132H	Sensitive	Case Reports	IDH1 inhibitor	NA	NA	missense	TCGA-HT-7684-01A-11D-2253-08	LGG
EGFR	p.L858R	Sensitive	FDA Approved	erlotinib, afatinib	NA	NA	missense	TCGA-97-8177-01A-11D-2284-08	LUAD
BRCA1	p.L135*	Sensitive	FDA Approved	PARP inhibitors	NA	NA	nonsense	TCGA-29-2427	OV
PIK3CA	p.E545K	Sensitive	Case Reports	mTOR inhibitors	NA	NA	missense	TCGA-D5-6931-01A-11D-1924-10	COADREAD
MAP2K1	p.P124S	Both	Preclinical	BRAF inhibitors in BRAF mutant tumor	Clinical Trials	BRAF inhibitors	missense	TCGA-D5-6931-01A-11D-1924-10	COADREAD
KRAS	p.G12D	Both	Clinical Trials	MEK inhibitors	FDA Approved	panitumumab	missense	TCGA-D5-6931-01A-11D-1924-10	COADREAD
IDH1	p.R132H	Sensitive	Case Reports	IDH1 inhibitor	NA	NA	missense	TCGA-CS-4938-01B-11D-1893-08	LGG
AKT1	p.E17K	Sensitive	Clinical Trials	AKT inhibitors	NA	NA	missense	TCGA-D8-A141-01A-11D-A10Y-09	BRCA
IDH1	p.R132H	Sensitive	Case Reports	IDH1 inhibitor	NA	NA	missense	TCGA-DU-5853-01A-11D-1893-08	LGG
KIT	p.V64G	Sensitive	FDA Approved	imatinib	NA	NA	missense	TCGA-DU-5853-01A-11D-1893-08	LGG
HRAS	p.G12S	Sensitive	Case Reports	mTOR inhibitors	NA	NA	missense	TCGA-CR-7382-01A-11D-2129-08	HNSC
EGFR	p.A289V	Sensitive	Case Reports	erlotinib	NA	NA	missense	TCGA-81-5911-01A-12D-1845-08	GBM
NRAS	p.G13D	Both	Case Reports	MEK inhibitors	FDA Approved	cetuximab, panitumumab	missense	TCGA-AB-2816-03B-01W-0728-08	LAML
FLT3	p.D835Y	Both	Preclinical	lestaurtinib	Case Reports	sorafenib	missense	TCGA-AB-2816-03B-01W-0728-08	LAML
BRAF	p.V600E	Both	FDA Approved	vemurafenib, dabrafenib, trametinib, dabrafenib + trametinib	Clinical Trials	cetuximab, panitumumab	missense	TCGA-DA-A3F5-06A-11D-A20D-08	SKCM
NRAS	p.G12A	Both	Case Reports	MEK inhibitors	FDA Approved	cetuximab, panitumumab	missense	TCGA-EE-A29V-06A-12D-A197-08	SKCM
IDH1	p.R132H	Sensitive	Case Reports	IDH1 inhibitor	NA	NA	missense	TCGA-CS-4943-01A-01D-1468-08	LGG
PIK3CA	p.E545K	Sensitive	Case Reports	mTOR inhibitors	NA	NA	missense	TCGA-66-2759-01A-01D-1522-08	LUSC
MAP2K1	p.P124S	Both	Preclinical	BRAF inhibitors in BRAF mutant tumor	Clinical Trials	BRAF inhibitors	missense	TCGA-D3-A51F-06A-11D-A25O-08	SKCM
BRAF	p.V600E	Both	FDA Approved	vemurafenib, dabrafenib, trametinib, dabrafenib + trametinib	Clinical Trials	cetuximab, panitumumab	missense	TCGA-D3-A51F-06A-11D-A25O-08	SKCM
PIK3CA	p.H1047R	Sensitive	Clinical Trials	PI3K/AKT/mTOR inhibitors	NA	NA	missense	TCGA-A8-A06Q-01A-11W-A050-09	BRCA
PIK3CA	p.E545K	Sensitive	Case Reports	mTOR inhibitors	NA	NA	missense	TCGA-CM-6680-01A-11D-1835-10	COADREAD
NRAS	p.Q61K	Both	Clinical Trials	MEK inhibitors	FDA Approved	cetuximab, panitumumab	missense	TCGA-CM-6680-01A-11D-1835-10	COADREAD
BRAF	p.V600E	Both	FDA Approved	vemurafenib, dabrafenib, trametinib, dabrafenib + trametinib	Clinical Trials	cetuximab, panitumumab	missense	TCGA-DJ-A3UN-01A-11D-A22D-08	THCA
IDH1	p.R132H	Sensitive	Case Reports	IDH1 inhibitor	NA	NA	missense	TCGA-DU-5870-01A-11D-1705-08	LGG
PIK3CA	p.E545K	Sensitive	Case Reports	mTOR inhibitors	NA	NA	missense	TCGA-G2-A2EO-01A-11D-A17V-08	BLCA
NOTCH1	p.S2521F	Sensitive	Clinical Trials	steroids early setting	NA	NA	missense	TCGA-G2-A2EO-01A-11D-A17V-08	BLCA
KRAS	p.Q61E	Both	Clinical Trials	MEK inhibitors	FDA Approved	panitumumab	missense	TCGA-NJ-A4YP-01A-11D-A25L-08	LUAD
NRAS	p.Q61R	Both	Clinical Trials	MEK inhibitors	FDA Approved	cetuximab, panitumumab	missense	TCGA-EE-A2A5-06A-11D-A197-08	SKCM
KRAS	p.Q61L	Both	Clinical Trials	MEK inhibitors	FDA Approved	panitumumab	missense	TCGA-B5-A11N-01A-11D-A122-09	UCEC
IDH1	p.R132H	Sensitive	Case Reports	IDH1 inhibitor	NA	NA	missense	TCGA-E1-5322-01A-01D-1468-08	LGG
NRAS	p.Q61H	Both	Clinical Trials	MEK inhibitors	FDA Approved	cetuximab, panitumumab	missense	TCGA-ER-A19N-06A-11D-A197-08	SKCM
KRAS	p.G12V	Both	Clinical Trials	MEK inhibitors	FDA Approved	panitumumab	missense	TCGA-73-4659-01A-01D-1265-08	LUAD
NRAS	p.Q61R	Both	Clinical Trials	MEK inhibitors	FDA Approved	cetuximab, panitumumab	missense	TCGA-DA-A3F3-06A-11D-A20D-08	SKCM
NRAS	p.Q61R	Both	Clinical Trials	MEK inhibitors	FDA Approved	cetuximab, panitumumab	missense	TCGA-DJ-A1QG-01A-11D-A14W-08	THCA
PIK3CA	p.H1047R	Sensitive	Clinical Trials	PI3K/AKT/mTOR inhibitors	NA	NA	missense	TCGA-B6-A0RO-01A-22D-A099-09	BRCA
KRAS	p.A146T	Both	Case Reports	MEK inhibitors + PI3K pathway inhibitors	Clinical Trials	cetuximab, panitumumab	missense	TCGA-CM-6166-01A-11D-1650-10	COADREAD
KRAS	p.G12A	Both	Clinical Trials	MEK inhibitors	FDA Approved	panitumumab	missense	TCGA-67-4679-01B-01D-1753-08	LUAD
IDH1	p.R132H	Sensitive	Case Reports	IDH1 inhibitor	NA	NA	missense	TCGA-DB-A4XC-01A-11D-A26M-08	LGG
BRAF	p.V600E	Both	FDA Approved	vemurafenib, dabrafenib, trametinib, dabrafenib + trametinib	Clinical Trials	cetuximab, panitumumab	missense	TCGA-EB-A3HV-01A-11D-A21A-08	SKCM
BRCA1	p.K504*	Sensitive	FDA Approved	PARP inhibitors	NA	NA	nonsense	TCGA-30-1857	OV
PDGFRA	p.G662R	Sensitive	Clinical Trials	imatinib	NA	NA	missense	TCGA-FS-A1ZF-06A-12D-A197-08	SKCM
BRAF	p.V600E	Both	FDA Approved	vemurafenib, dabrafenib, trametinib, dabrafenib + trametinib	Clinical Trials	cetuximab, panitumumab	missense	TCGA-FS-A1ZF-06A-12D-A197-08	SKCM
PIK3CA	p.E545K	Sensitive	Case Reports	mTOR inhibitors	NA	NA	missense	TCGA-EW-A1J5-01A-11D-A13L-09	BRCA
NOTCH1	p.R2327W	Sensitive	Clinical Trials	steroids early setting	NA	NA	missense	TCGA-61-2012	OV
NRAS	p.Q61R	Both	Clinical Trials	MEK inhibitors	FDA Approved	cetuximab, panitumumab	missense	TCGA-61-2016	OV
NRAS	p.Q61K	Both	Clinical Trials	MEK inhibitors	FDA Approved	cetuximab, panitumumab	missense	TCGA-CD-A489-01A-11D-A24D-08	STAD
PIK3CA	p.E545K	Sensitive	Case Reports	mTOR inhibitors	NA	NA	missense	TCGA-B0-4693-01A-01D-1361-10	KIRC
KRAS	p.G12A	Both	Clinical Trials	MEK inhibitors	FDA Approved	panitumumab	missense	TCGA-NJ-A55R-01A-11D-A25L-08	LUAD
PIK3CA	p.H1047R	Sensitive	Clinical Trials	PI3K/AKT/mTOR inhibitors	NA	NA	missense	TCGA-GM-A2DD-01A-11D-A17W-09	BRCA
BRAF	p.V600E	Both	FDA Approved	vemurafenib, dabrafenib, trametinib, dabrafenib + trametinib	Clinical Trials	cetuximab, panitumumab	missense	TCGA-E8-A44K-01A-21D-A23U-08	THCA
BRAF	p.V600E	Both	FDA Approved	vemurafenib, dabrafenib, trametinib, dabrafenib + trametinib	Clinical Trials	cetuximab, panitumumab	missense	TCGA-ET-A25J-01A-11D-A16O-08	THCA
BRAF	p.V600E	Both	FDA Approved	vemurafenib, dabrafenib, trametinib, dabrafenib + trametinib	Clinical Trials	cetuximab, panitumumab	missense	TCGA-DA-A1I2-06A-21D-A19A-08	SKCM
BRAF	p.V600E	Both	FDA Approved	vemurafenib, dabrafenib, trametinib, dabrafenib + trametinib	Clinical Trials	cetuximab, panitumumab	missense	TCGA-KS-A4I5-01A-11D-A257-08	THCA
PIK3CA	p.E545K	Sensitive	Case Reports	mTOR inhibitors	NA	NA	missense	TCGA-A2-A4S2-01A-12D-A25Q-09	BRCA
IDH1	p.R132H	Sensitive	Case Reports	IDH1 inhibitor	NA	NA	missense	TCGA-HT-8018-01A-11D-2395-08	LGG
PIK3CA	p.H1047R	Sensitive	Clinical Trials	PI3K/AKT/mTOR inhibitors	NA	NA	missense	TCGA-44-5645-01A-01D-1625-08	LUAD
BRAF	p.V600E	Both	FDA Approved	vemurafenib, dabrafenib, trametinib, dabrafenib + trametinib	Clinical Trials	cetuximab, panitumumab	missense	TCGA-EM-A2OX-01A-11D-A202-08	THCA
BRAF	p.V600E	Both	FDA Approved	vemurafenib, dabrafenib, trametinib, dabrafenib + trametinib	Clinical Trials	cetuximab, panitumumab	missense	TCGA-FY-A40K-01A-11D-A23M-08	THCA
IDH1	p.R132H	Sensitive	Case Reports	IDH1 inhibitor	NA	NA	missense	TCGA-HT-7694-01A-11D-2253-08	LGG
ERBB2	p.G776in_frame_insVC	Sensitive	Clinical Trials	trastuzumab	NA	NA	in_frame_ins	TCGA-86-6562-01A-11D-1753-08	LUAD
PDGFRA	p.Y84N	Sensitive	Clinical Trials	imatinib	NA	NA	missense	TCGA-13-1483	OV
NOTCH1	p.S2289R	Sensitive	Clinical Trials	steroids early setting	NA	NA	missense	TCGA-CJ-4888-01A-01D-1373-10	KIRC
PIK3CA	p.E545K	Sensitive	Case Reports	mTOR inhibitors	NA	NA	missense	TCGA-AO-A0JF-01A-11W-A071-09	BRCA
PIK3CA	p.H1047R	Sensitive	Clinical Trials	PI3K/AKT/mTOR inhibitors	NA	NA	missense	TCGA-EA-A3QE-01A-21D-A21Q-09	CESC
NOTCH1	p.S1651L	Sensitive	Clinical Trials	steroids early setting	NA	NA	missense	TCGA-EA-A3QE-01A-21D-A21Q-09	CESC
BRAF	p.V600E	Both	FDA Approved	vemurafenib, dabrafenib, trametinib, dabrafenib + trametinib	Clinical Trials	cetuximab, panitumumab	missense	TCGA-DJ-A3UQ-01A-11D-A22D-08	THCA
BRCA1	p.I30fs	Sensitive	FDA Approved	PARP inhibitors	NA	NA	frame_shift_del_unspecified	TCGA-13-1489	OV
BRAF	p.V600E	Both	FDA Approved	vemurafenib, dabrafenib, trametinib, dabrafenib + trametinib	Clinical Trials	cetuximab, panitumumab	missense	TCGA-EL-A3MY-01A-11D-A21A-08	THCA
IDH1	p.R132H	Sensitive	Case Reports	IDH1 inhibitor	NA	NA	missense	TCGA-HT-7881-01A-11D-2395-08	LGG
PIK3CA	p.H1047R	Sensitive	Clinical Trials	PI3K/AKT/mTOR inhibitors	NA	NA	missense	TCGA-BR-6452-01A-12D-1800-08	STAD
KIT	p.Y494C	Both	FDA Approved	imatinib, sunitinib, regorafenib	Clinical Trials	imatinib (low dose)	missense	TCGA-BR-6452-01A-12D-1800-08	STAD
NRAS	p.Q61K	Both	Clinical Trials	MEK inhibitors	FDA Approved	cetuximab, panitumumab	missense	TCGA-CL-4957-01A-01D-1733-10	COADREAD
PIK3CA	p.E545K	Sensitive	Case Reports	mTOR inhibitors	NA	NA	missense	TCGA-C5-A1BQ-01C-11D-A20U-09	CESC
KRAS	p.G13D	Both	Clinical Trials	cetuximab	FDA Approved	panitumumab	missense	TCGA-AG-3605-01A-01W-0833-10	COADREAD
NRAS	p.Q61R	Both	Clinical Trials	MEK inhibitors	FDA Approved	cetuximab, panitumumab	missense	TCGA-EE-A2GM-06B-11D-A196-08	SKCM
PIK3CA	p.E545K	Sensitive	Case Reports	mTOR inhibitors	NA	NA	missense	TCGA-D5-6532-01A-11D-1719-10	COADREAD
KRAS	p.G13D	Both	Clinical Trials	cetuximab	FDA Approved	panitumumab	missense	TCGA-D5-6532-01A-11D-1719-10	COADREAD
FGFR3	p.Y373C	Both	Case Reports	FGFR inhibitors	Preclinical	bortezomib	missense	TCGA-HE-7130-01A-11D-1961-08	KIRP
FGFR3	p.K650N	Sensitive	Case Reports	FGFR inhibitors	NA	NA	missense	TCGA-HE-7130-01A-11D-1961-08	KIRP
PIK3CA	p.E545K	Sensitive	Case Reports	mTOR inhibitors	NA	NA	missense	TCGA-64-1677-01A-01W-0928-08	LUAD
BRAF	p.V600E	Both	FDA Approved	vemurafenib, dabrafenib, trametinib, dabrafenib + trametinib	Clinical Trials	cetuximab, panitumumab	missense	TCGA-D3-A3C1-06A-12D-A196-08	SKCM
PIK3CA	p.E545K	Sensitive	Case Reports	mTOR inhibitors	NA	NA	missense	TCGA-UF-A7J9-01A-12D-A34J-08	HNSC
NRAS	p.Q61R	Both	Clinical Trials	MEK inhibitors	FDA Approved	cetuximab, panitumumab	missense	TCGA-EM-A2CN-01A-11D-A19J-08	THCA
KRAS	p.G12C	Both	Clinical Trials	MEK inhibitors	FDA Approved	panitumumab	missense	TCGA-55-8615-01A-11D-2393-08	LUAD
KRAS	p.G13D	Both	Clinical Trials	cetuximab	FDA Approved	panitumumab	missense	TCGA-BR-8368-01A-11D-2340-08	STAD
IDH2	p.R172K	Sensitive	Clinical Trials	IDH2 inhibitor	NA	NA	missense	TCGA-AB-2898-03A-01W-0733-08	LAML
IDH1	p.R132H	Sensitive	Case Reports	IDH1 inhibitor	NA	NA	missense	TCGA-CS-5396-01A-02D-1468-08	LGG
BRAF	p.V600E	Both	FDA Approved	vemurafenib, dabrafenib, trametinib, dabrafenib + trametinib	Clinical Trials	cetuximab, panitumumab	missense	TCGA-IM-A3U2-01A-21D-A22D-08	THCA
NRAS	p.G12C	Both	Case Reports	ERK inhibitors	FDA Approved	cetuximab, panitumumab	missense	TCGA-AB-2985-03A-01D-0739-09	LAML
FGFR2	p.S252W	Sensitive	Case Reports	FGFR inhibitors	NA	NA	missense	TCGA-A5-A0GW-01A-11W-A062-09	UCEC
BRAF	p.V600K	Sensitive	FDA Approved	dabrafenib, RAF inhibitor	NA	NA	missense	TCGA-BF-A3DM-01A-11D-A20D-08	SKCM
BRAF	p.V600E	Both	FDA Approved	vemurafenib, dabrafenib, trametinib, dabrafenib + trametinib	Clinical Trials	cetuximab, panitumumab	missense	TCGA-EM-A22P-01A-11D-A19J-08	THCA
FGFR2	p.R550W	Both	Case Reports	ponatinib	Preclinical	dovitinib	missense	TCGA-D1-A15X-01A-11D-A122-09	UCEC
KRAS	p.G13D	Both	Clinical Trials	cetuximab	FDA Approved	panitumumab	missense	TCGA-D1-A15X-01A-11D-A122-09	UCEC
EGFR	p.L858R	Sensitive	FDA Approved	erlotinib, afatinib	NA	NA	missense	TCGA-MP-A4T9-01A-11D-A24P-08	LUAD
PIK3CA	p.H1047R	Sensitive	Clinical Trials	PI3K/AKT/mTOR inhibitors	NA	NA	missense	TCGA-BH-A208-01A-11D-A159-09	BRCA
KRAS	p.G12D	Both	Clinical Trials	MEK inhibitors	FDA Approved	panitumumab	missense	TCGA-MI-A75C-01A-11D-A32G-10	LIHC
BRAF	p.V600E	Both	FDA Approved	vemurafenib, dabrafenib, trametinib, dabrafenib + trametinib	Clinical Trials	cetuximab, panitumumab	missense	TCGA-H2-A421-01A-11D-A23M-08	THCA
EZH2	p.Y641N	Sensitive	Case Reports	EZH2 inhibitor	NA	NA	missense	TCGA-BF-A1PV-01A-11D-A19A-08	SKCM
NRAS	p.Q61L	Both	Clinical Trials	MEK inhibitors	FDA Approved	cetuximab, panitumumab	missense	TCGA-BF-A1PV-01A-11D-A19A-08	SKCM
NOTCH2	p.M2183V	Sensitive	Case Reports	Gamma secretase inhibitors	NA	NA	missense	TCGA-17-Z058-01A-01W-0747-08	LUAD
JAK2	p.V617F	Sensitive	FDA Approved	ruxolitinib	NA	NA	missense	TCGA-AB-2865-03B-01W-0728-08	LAML
KRAS	p.G12D	Both	Clinical Trials	MEK inhibitors	FDA Approved	panitumumab	missense	TCGA-AB-2865-03B-01W-0728-08	LAML
BRAF	p.V600E	Both	FDA Approved	vemurafenib, dabrafenib, trametinib, dabrafenib + trametinib	Clinical Trials	cetuximab, panitumumab	missense	TCGA-EL-A3T6-01A-11D-A21Z-08	THCA
BRAF	p.V600E	Both	FDA Approved	vemurafenib, dabrafenib, trametinib, dabrafenib + trametinib	Clinical Trials	cetuximab, panitumumab	missense	TCGA-EB-A431-01A-11D-A25O-08	SKCM
BRAF	p.V600E	Both	FDA Approved	vemurafenib, dabrafenib, trametinib, dabrafenib + trametinib	Clinical Trials	cetuximab, panitumumab	missense	TCGA-DJ-A1QO-01A-11D-A14W-08	THCA
KRAS	p.G12D	Both	Clinical Trials	MEK inhibitors	FDA Approved	panitumumab	missense	TCGA-AP-A0LD-01A-11W-A062-09	UCEC
PIK3CA	p.H1047R	Sensitive	Clinical Trials	PI3K/AKT/mTOR inhibitors	NA	NA	missense	TCGA-E2-A15E-01A-11D-A12B-09	BRCA
HRAS	p.G12A	Sensitive	Case Reports	mTOR inhibitors	NA	NA	missense	TCGA-CV-6938-01A-11D-1912-08	HNSC
BRAF	p.V600E	Both	FDA Approved	vemurafenib, dabrafenib, trametinib, dabrafenib + trametinib	Clinical Trials	cetuximab, panitumumab	missense	TCGA-E8-A433-01A-11D-A23M-08	THCA
ERBB4	p.E542K	Sensitive	Case Reports	lapatinib	NA	NA	missense	TCGA-EE-A2GC-06A-11D-A197-08	SKCM
EGFR	p.A289V	Sensitive	Case Reports	erlotinib	NA	NA	missense	TCGA-06-0881-01A-02W-0424-08	GBM
GNA11	p.Q209L	Sensitive	Clinical Trials	selumetinib	NA	NA	missense	TCGA-ER-A3ES-06A-11D-A20D-08	SKCM
BRAF	p.V600E	Both	FDA Approved	vemurafenib, dabrafenib, trametinib, dabrafenib + trametinib	Clinical Trials	cetuximab, panitumumab	missense	TCGA-D5-6928-01A-11D-1924-10	COADREAD
PIK3CA	p.E542K	Sensitive	Case Reports	mTOR inhibitors	NA	NA	missense	TCGA-BA-5557-01A-01D-1512-08	HNSC
PIK3CA	p.E542K	Sensitive	Case Reports	mTOR inhibitors	NA	NA	missense	TCGA-D6-6517-01A-11D-1870-08	HNSC
MTOR	p.S2215Y	Sensitive	Case Reports	rapamycin	NA	NA	missense	TCGA-A4-7828-01A-11D-2136-08	KIRP
NOTCH1	p.C1561Y	Sensitive	Clinical Trials	steroids early setting	NA	NA	missense	TCGA-C5-A1MF-01A-11D-A13W-08	CESC
PDGFRA	p.V594A	Sensitive	Clinical Trials	imatinib	NA	NA	missense	TCGA-CC-5263-01A-01D-A12Z-10	LIHC
BRCA2	p.S3231*	Sensitive	FDA Approved	PARP inhibitors	NA	NA	nonsense	TCGA-EI-6513-01A-21D-1733-10	COADREAD
NRAS	p.Q61K	Both	Clinical Trials	MEK inhibitors	FDA Approved	cetuximab, panitumumab	missense	TCGA-ER-A195-06A-11D-A196-08	SKCM
BRAF	p.V600E	Both	FDA Approved	vemurafenib, dabrafenib, trametinib, dabrafenib + trametinib	Clinical Trials	cetuximab, panitumumab	missense	TCGA-EL-A4KG-01A-11D-A257-08	THCA
BRAF	p.V600E	Both	FDA Approved	vemurafenib, dabrafenib, trametinib, dabrafenib + trametinib	Clinical Trials	cetuximab, panitumumab	missense	TCGA-EM-A3AK-01A-11D-A202-08	THCA
BRAF	p.V600K	Sensitive	FDA Approved	dabrafenib, RAF inhibitor	NA	NA	missense	TCGA-EE-A2ME-06A-11D-A197-08	SKCM
NRAS	p.Q61H	Both	Clinical Trials	MEK inhibitors	FDA Approved	cetuximab, panitumumab	missense	TCGA-AB-2968-03A-01D-0739-09	LAML
KRAS	p.G12V	Both	Clinical Trials	MEK inhibitors	FDA Approved	panitumumab	missense	TCGA-78-7161-01A-11D-2036-08	LUAD
KRAS	p.G12S	Both	Clinical Trials	MEK inhibitors	FDA Approved	panitumumab	missense	TCGA-G5-6572-01A-11D-1826-10	COADREAD
NRAS	p.Q61K	Both	Clinical Trials	MEK inhibitors	FDA Approved	cetuximab, panitumumab	missense	TCGA-AA-A00F-01A-01W-A005-10	COADREAD
BRCA1	p.E377*	Sensitive	FDA Approved	PARP inhibitors	NA	NA	nonsense	TCGA-AX-A0J0-01A-11D-A117-09	UCEC
FGFR2	p.N550H	Both	Case Reports	ponatinib	Preclinical	Dovitinib	missense	TCGA-AX-A0J0-01A-11D-A117-09	UCEC
HRAS	p.G12S	Sensitive	Case Reports	mTOR inhibitors	NA	NA	missense	TCGA-CV-A6JO-01B-11D-A34J-08	HNSC
BRAF	p.V600E	Both	FDA Approved	vemurafenib, dabrafenib, trametinib, dabrafenib + trametinib	Clinical Trials	cetuximab, panitumumab	missense	TCGA-BJ-A2NA-01A-12D-A19J-08	THCA
SF3B1	p.K700E	Sensitive	Case Reports	spliceosome inhibitor	NA	NA	missense	TCGA-B6-A0WT-01A-11D-A10G-09	BRCA
IDH1	p.R132H	Sensitive	Case Reports	IDH1 inhibitor	NA	NA	missense	TCGA-DH-A66F-01A-11D-A29Q-08	LGG
PIK3CA	p.E545K	Sensitive	Case Reports	mTOR inhibitors	NA	NA	missense	TCGA-JW-A5VL-01A-11D-A28B-09	CESC
NOTCH1	p.A2356V	Sensitive	Clinical Trials	steroids early setting	NA	NA	missense	TCGA-AP-A059-01A-21D-A122-09	UCEC
KRAS	p.G12V	Both	Clinical Trials	MEK inhibitors	FDA Approved	panitumumab	missense	TCGA-55-7725-01A-11D-2167-08	LUAD
PIK3CA	p.E545K	Sensitive	Case Reports	mTOR inhibitors	NA	NA	missense	TCGA-CR-6472-01A-11D-1870-08	HNSC
IDH1	p.R132H	Sensitive	Case Reports	IDH1 inhibitor	NA	NA	missense	TCGA-DB-A64V-01A-11D-A29Q-08	LGG
IDH2	p.R172K	Sensitive	Clinical Trials	IDH2 inhibitor	NA	NA	missense	TCGA-DH-5141-01A-01D-1468-08	LGG
PIK3CA	p.H1047R	Sensitive	Clinical Trials	PI3K/AKT/mTOR inhibitors	NA	NA	missense	TCGA-HU-A4GX-01A-12D-A25D-08	STAD
FGFR4	p.V550L	Sensitive	Case Reports	FGFR inhibitors	NA	NA	missense	TCGA-D1-A177-01A-21D-A12J-09	UCEC
NRAS	p.Q61K	Both	Clinical Trials	MEK inhibitors	FDA Approved	cetuximab, panitumumab	missense	TCGA-AG-A01L-01A-01W-A005-10	COADREAD
PIK3CA	p.E545K	Sensitive	Case Reports	mTOR inhibitors	NA	NA	missense	TCGA-D5-6920-01A-11D-1924-10	COADREAD
KRAS	p.G12D	Both	Clinical Trials	MEK inhibitors	FDA Approved	panitumumab	missense	TCGA-D1-A163-01A-11D-A12J-09	UCEC
BRAF	p.V600E	Both	FDA Approved	vemurafenib, dabrafenib, trametinib, dabrafenib + trametinib	Clinical Trials	cetuximab, panitumumab	missense	TCGA-ER-A19C-06A-11D-A196-08	SKCM
BRAF	p.V600E	Both	FDA Approved	vemurafenib, dabrafenib, trametinib, dabrafenib + trametinib	Clinical Trials	cetuximab, panitumumab	missense	TCGA-L6-A4EP-01A-11D-A257-08	THCA
BRAF	p.V600E	Both	FDA Approved	vemurafenib, dabrafenib, trametinib, dabrafenib + trametinib	Clinical Trials	cetuximab, panitumumab	missense	TCGA-DJ-A13V-01A-11D-A10S-08	THCA
BRCA1	p.K292fs	Sensitive	FDA Approved	PARP inhibitors	NA	NA	frame_shift_del_unspecified	TCGA-BR-4362-01A-01D-1158-08	STAD
BRCA2	p.L759fs	Sensitive	FDA Approved	PARP inhibitors	NA	NA	frame_shift_del_unspecified	TCGA-BR-4362-01A-01D-1158-08	STAD
AKT1	p.E17K	Sensitive	Clinical Trials	AKT inhibitors	NA	NA	missense	TCGA-AO-A12H-01A-11D-A10Y-09	BRCA
KRAS	p.G12A	Both	Clinical Trials	MEK inhibitors	FDA Approved	panitumumab	missense	TCGA-B5-A0K3-01A-11W-A062-09	UCEC
PIK3CA	p.H1047R	Sensitive	Clinical Trials	PI3K/AKT/mTOR inhibitors	NA	NA	missense	TCGA-A7-A5ZW-01A-12D-A29N-09	BRCA
KRAS	p.G13D	Both	Clinical Trials	cetuximab	FDA Approved	panitumumab	missense	TCGA-A5-A0GB-01A-11W-A062-09	UCEC
BRAF	p.V600E	Both	FDA Approved	vemurafenib, dabrafenib, trametinib, dabrafenib + trametinib	Clinical Trials	cetuximab, panitumumab	missense	TCGA-D3-A2JP-06A-11D-A19A-08	SKCM
BRAF	p.V600E	Both	FDA Approved	vemurafenib, dabrafenib, trametinib, dabrafenib + trametinib	Clinical Trials	cetuximab, panitumumab	missense	TCGA-EL-A3CN-01A-12D-A20C-08	THCA
KRAS	p.G12C	Both	Clinical Trials	MEK inhibitors	FDA Approved	panitumumab	missense	TCGA-DY-A1H8-01A-21D-A152-10	COADREAD
PIK3CA	p.H1047R	Sensitive	Clinical Trials	PI3K/AKT/mTOR inhibitors	NA	NA	missense	TCGA-BS-A0UL-01A-11D-A10G-09	UCEC
KRAS	p.G12V	Both	Clinical Trials	MEK inhibitors	FDA Approved	panitumumab	missense	TCGA-BS-A0UL-01A-11D-A10G-09	UCEC
KRAS	p.Q61R	Both	Clinical Trials	MEK inhibitors	FDA Approved	panitumumab	missense	TCGA-BJ-A0ZE-01A-11D-A10S-08	THCA
BRAF	p.V600E	Both	FDA Approved	vemurafenib, dabrafenib, trametinib, dabrafenib + trametinib	Clinical Trials	cetuximab, panitumumab	missense	TCGA-44-2666	LUAD
PIK3CA	p.E545K	Sensitive	Case Reports	mTOR inhibitors	NA	NA	missense	TCGA-A8-A075-01A-11D-A099-09	BRCA
BRAF	p.V600E	Both	FDA Approved	vemurafenib, dabrafenib, trametinib, dabrafenib + trametinib	Clinical Trials	cetuximab, panitumumab	missense	TCGA-D3-A5GS-06A-11D-A27K-08	SKCM
KRAS	p.G12C	Both	Clinical Trials	MEK inhibitors	FDA Approved	panitumumab	missense	TCGA-44-2668	LUAD
KRAS	p.G13D	Both	Clinical Trials	cetuximab	FDA Approved	panitumumab	missense	TCGA-G5-6235-01A-11D-1733-10	COADREAD
PIK3CA	p.H1047R	Sensitive	Clinical Trials	PI3K/AKT/mTOR inhibitors	NA	NA	missense	TCGA-B6-A0RN-01A-12D-A099-09	BRCA
KRAS	p.G13D	Both	Clinical Trials	cetuximab	FDA Approved	panitumumab	missense	TCGA-BS-A0TJ-01A-11D-A10B-09	UCEC
PIK3CA	p.E545K	Sensitive	Case Reports	mTOR inhibitors	NA	NA	missense	TCGA-A8-A06P-01A-11W-A019-09	BRCA
BRAF	p.V600E	Both	FDA Approved	vemurafenib, dabrafenib, trametinib, dabrafenib + trametinib	Clinical Trials	cetuximab, panitumumab	missense	TCGA-DJ-A1QF-01A-12D-A14W-08	THCA
PIK3CA	p.E545K	Sensitive	Case Reports	mTOR inhibitors	NA	NA	missense	TCGA-51-4079-01A-01D-1458-08	LUSC
PIK3CA	p.H1047R	Sensitive	Clinical Trials	PI3K/AKT/mTOR inhibitors	NA	NA	missense	TCGA-F7-A61S-01A-11D-A28R-08	HNSC
PIK3CA	p.E545K	Sensitive	Case Reports	mTOR inhibitors	NA	NA	missense	TCGA-A8-A08T-01A-21W-A019-09	BRCA
PIK3CA	p.E545K	Sensitive	Case Reports	mTOR inhibitors	NA	NA	missense	TCGA-C8-A133-01A-32D-A12B-09	BRCA
BRAF	p.V600E	Both	FDA Approved	vemurafenib, dabrafenib, trametinib, dabrafenib + trametinib	Clinical Trials	cetuximab, panitumumab	missense	TCGA-EM-A4FQ-01A-11D-A257-08	THCA
KRAS	p.G13D	Both	Clinical Trials	cetuximab	FDA Approved	panitumumab	missense	TCGA-BG-A0MC-01A-21W-A062-09	UCEC
BRAF	p.V600E	Both	FDA Approved	vemurafenib, dabrafenib, trametinib, dabrafenib + trametinib	Clinical Trials	cetuximab, panitumumab	missense	TCGA-DJ-A1QH-01A-21D-A14W-08	THCA
NOTCH2	p.R2019M	Sensitive	Case Reports	Gamma secretase inhibitors	NA	NA	missense	TCGA-BF-A1Q0-01A-21D-A19A-08	SKCM
PIK3CA	p.E545K	Sensitive	Case Reports	mTOR inhibitors	NA	NA	missense	TCGA-EK-A2RN-01A-12D-A20U-09	CESC
BRAF	p.V600E	Both	FDA Approved	vemurafenib, dabrafenib, trametinib, dabrafenib + trametinib	Clinical Trials	cetuximab, panitumumab	missense	TCGA-FS-A1ZM-06A-12D-A197-08	SKCM
KRAS	p.G12D	Both	Clinical Trials	MEK inhibitors	FDA Approved	panitumumab	missense	TCGA-N6-A4V9-01A-11D-A28R-08	UCS
PIK3CA	p.E542K	Sensitive	Case Reports	mTOR inhibitors	NA	NA	missense	TCGA-A8-A084-01A-21W-A019-09	BRCA
FGFR2	p.N550K	Both	Case Reports	ponatinib	Preclinical	Dovitinib	missense	TCGA-A8-A084-01A-21W-A019-09	BRCA
FGFR2	p.N549K	Sensitive	Case Reports	FGFR inhibitors	NA	NA	missense	TCGA-A8-A084-01A-21W-A019-09	BRCA
BRAF	p.V600E	Both	FDA Approved	vemurafenib, dabrafenib, trametinib, dabrafenib + trametinib	Clinical Trials	cetuximab, panitumumab	missense	TCGA-EE-A29W-06A-11D-A196-08	SKCM
PIK3CA	p.E542K	Sensitive	Case Reports	mTOR inhibitors	NA	NA	missense	TCGA-D5-6541-01A-11D-1719-10	COADREAD
KRAS	p.G12D	Both	Clinical Trials	MEK inhibitors	FDA Approved	panitumumab	missense	TCGA-D5-6541-01A-11D-1719-10	COADREAD
PIK3CA	p.H1047R	Sensitive	Clinical Trials	PI3K/AKT/mTOR inhibitors	NA	NA	missense	TCGA-E2-A10B-01A-11D-A10M-09	BRCA
BRCA2	p.S3231*	Sensitive	FDA Approved	PARP inhibitors	NA	NA	nonsense	TCGA-LP-A4AW-01A-11D-A243-09	CESC
NRAS	p.Q61R	Both	Clinical Trials	MEK inhibitors	FDA Approved	cetuximab, panitumumab	missense	TCGA-FS-A1ZT-06A-11D-A197-08	SKCM
BRAF	p.V600R	Sensitive	FDA Approved	dabrafenib, RAF inhibitor	NA	NA	missense	TCGA-D3-A1QA-06A-11D-A196-08	SKCM
BRCA2	p.Q2655*	Sensitive	FDA Approved	PARP inhibitors	NA	NA	nonsense	TCGA-BT-A42C-01A-11D-A23M-08	BLCA
FGFR3	p.Y373C	Both	Case Reports	FGFR inhibitors	Preclinical	bortezomib	missense	TCGA-BT-A42C-01A-11D-A23M-08	BLCA
KRAS	p.G12D	Both	Clinical Trials	MEK inhibitors	FDA Approved	panitumumab	missense	TCGA-17-Z060-01A-01W-0747-08	LUAD
NRAS	p.Q61R	Both	Clinical Trials	MEK inhibitors	FDA Approved	cetuximab, panitumumab	missense	TCGA-BJ-A45F-01A-12D-A23U-08	THCA
EGFR	p.G598V	Sensitive	Case Reports	erlotinib	NA	NA	missense	TCGA-06-0125-02A-11D-2280-08	GBM
BRAF	p.V600E	Both	FDA Approved	vemurafenib, dabrafenib, trametinib, dabrafenib + trametinib	Clinical Trials	cetuximab, panitumumab	missense	TCGA-ET-A3BU-01A-11D-A19J-08	THCA
BRAF	p.V600E	Both	FDA Approved	vemurafenib, dabrafenib, trametinib, dabrafenib + trametinib	Clinical Trials	cetuximab, panitumumab	missense	TCGA-GN-A265-06A-21D-A197-08	SKCM
IDH1	p.R132H	Sensitive	Case Reports	IDH1 inhibitor	NA	NA	missense	TCGA-AB-2884-03A-01W-0732-08	LAML
BRAF	p.V600E	Both	FDA Approved	vemurafenib, dabrafenib, trametinib, dabrafenib + trametinib	Clinical Trials	cetuximab, panitumumab	missense	TCGA-GE-A2C6-01A-11D-A17V-08	THCA
PIK3CA	p.H1047R	Sensitive	Clinical Trials	PI3K/AKT/mTOR inhibitors	NA	NA	missense	TCGA-QU-A6IN-01A-11D-A31L-08	PRAD
PIK3CA	p.H1047R	Sensitive	Clinical Trials	PI3K/AKT/mTOR inhibitors	NA	NA	missense	TCGA-D1-A17S-01A-11D-A12J-09	UCEC
PIK3CA	p.E545K	Sensitive	Case Reports	mTOR inhibitors	NA	NA	missense	TCGA-AN-A0AK-01A-21W-A019-09	BRCA
PIK3CA	p.E542K	Sensitive	Case Reports	mTOR inhibitors	NA	NA	missense	TCGA-CN-6013-01A-11D-1683-08	HNSC
BRAF	p.V600E	Both	FDA Approved	vemurafenib, dabrafenib, trametinib, dabrafenib + trametinib	Clinical Trials	cetuximab, panitumumab	missense	TCGA-EE-A3JE-06A-11D-A20D-08	SKCM
PIK3CA	p.E545K	Sensitive	Case Reports	mTOR inhibitors	NA	NA	missense	TCGA-G4-6304-01A-11D-1924-10	COADREAD
BRCA2	p.A442fs	Sensitive	FDA Approved	PARP inhibitors	NA	NA	frame_shift_del_unspecified	TCGA-17-Z023-01A-01W-0746-08	LUAD
KIT	p.S712F	Sensitive	Clinical Trials	sunitinib	NA	NA	missense	TCGA-17-Z023-01A-01W-0746-08	LUAD
BRAF	p.V600K	Sensitive	FDA Approved	dabrafenib, RAF inhibitor	NA	NA	missense	TCGA-BF-A5EQ-01A-21D-A27K-08	SKCM
KRAS	p.Q61L	Both	Clinical Trials	MEK inhibitors	FDA Approved	panitumumab	missense	TCGA-64-5775-01A-01D-1625-08	LUAD
KRAS	p.G12V	Both	Clinical Trials	MEK inhibitors	FDA Approved	panitumumab	missense	TCGA-86-A4JF-01A-11D-A24P-08	LUAD
BRAF	p.V600E	Both	FDA Approved	vemurafenib, dabrafenib, trametinib, dabrafenib + trametinib	Clinical Trials	cetuximab, panitumumab	missense	TCGA-DA-A1HW-06A-11D-A19A-08	SKCM
KRAS	p.G12V	Both	Clinical Trials	MEK inhibitors	FDA Approved	panitumumab	missense	TCGA-86-8054-01A-11D-2238-08	LUAD
ERBB2	p.L755S	Sensitive	Case Reports	neratinib	NA	NA	missense	TCGA-A8-A0A6-01A-12W-A071-09	BRCA
NOTCH2	p.T2355P	Sensitive	Case Reports	Gamma secretase inhibitors	NA	NA	missense	TCGA-A8-A0A6-01A-12W-A071-09	BRCA
PDGFRA	p.L819R	Sensitive	Clinical Trials	imatinib	NA	NA	missense	TCGA-CC-A7IH-01A-11D-A33K-10	LIHC
PIK3CA	p.E542K	Sensitive	Case Reports	mTOR inhibitors	NA	NA	missense	TCGA-BH-A5J0-01A-11D-A27P-09	BRCA
KRAS	p.G12C	Both	Clinical Trials	MEK inhibitors	FDA Approved	panitumumab	missense	TCGA-44-6777-01A-11D-1855-08	LUAD
IDH1	p.R132H	Sensitive	Case Reports	IDH1 inhibitor	NA	NA	missense	TCGA-DU-7306-01A-11D-2086-08	LGG
PIK3CA	p.E542K	Sensitive	Case Reports	mTOR inhibitors	NA	NA	missense	TCGA-HD-7832-01A-11D-2129-08	HNSC
PIK3CA	p.E542K	Sensitive	Case Reports	mTOR inhibitors	NA	NA	missense	TCGA-D8-A1XO-01A-11D-A14K-09	BRCA
KRAS	p.G13D	Both	Clinical Trials	cetuximab	FDA Approved	panitumumab	missense	TCGA-BR-4201-01A-01D-1126-08	STAD
CTNNB1	p.S37C	Sensitive	Clinical Trials	everolimus + letrozole	NA	NA	missense	TCGA-MP-A4SV-01A-11D-A24P-08	LUAD
FLT3	p.D835Y	Both	Preclinical	lestaurtinib	Case Reports	sorafenib	missense	TCGA-AB-2963-03A-01D-0739-09	LAML
NRAS	p.Q61H	Both	Clinical Trials	MEK inhibitors	FDA Approved	cetuximab, panitumumab	missense	TCGA-EE-A184-06A-11D-A196-08	SKCM
PIK3CA	p.E542K	Sensitive	Case Reports	mTOR inhibitors	NA	NA	missense	TCGA-JW-A69B-01A-11D-A32I-09	CESC
IDH1	p.R132H	Sensitive	Case Reports	IDH1 inhibitor	NA	NA	missense	TCGA-32-4208-01A-01D-1353-08	GBM
PIK3CA	p.E542K	Sensitive	Case Reports	mTOR inhibitors	NA	NA	missense	TCGA-AO-A03N-01B-11D-A10M-09	BRCA
KRAS	p.G12D	Both	Clinical Trials	MEK inhibitors	FDA Approved	panitumumab	missense	TCGA-BG-A0VW-01A-11D-A122-09	UCEC
BRCA2	p.E1493*	Sensitive	FDA Approved	PARP inhibitors	NA	NA	nonsense	TCGA-CA-6718-01A-11D-1835-10	COADREAD
IDH1	p.R132H	Sensitive	Case Reports	IDH1 inhibitor	NA	NA	missense	TCGA-HT-7475-01A-11D-2024-08	LGG
PIK3CA	p.E545K	Sensitive	Case Reports	mTOR inhibitors	NA	NA	missense	TCGA-CV-5442-01A-01D-1512-08	HNSC
FGFR3	p.D650H	Sensitive	Case Reports	FGFR inhibitors	NA	NA	missense	TCGA-CV-5442-01A-01D-1512-08	HNSC
PIK3CA	p.E545K	Sensitive	Case Reports	mTOR inhibitors	NA	NA	missense	TCGA-06-5417-01A-01D-1486-08	GBM
IDH1	p.R132H	Sensitive	Case Reports	IDH1 inhibitor	NA	NA	missense	TCGA-06-5417-01A-01D-1486-08	GBM
IDH1	p.R132H	Sensitive	Case Reports	IDH1 inhibitor	NA	NA	missense	TCGA-DU-A5TS-01A-11D-A289-08	LGG
PIK3CA	p.H1047R	Sensitive	Clinical Trials	PI3K/AKT/mTOR inhibitors	NA	NA	missense	TCGA-D8-A143-01A-11D-A10Y-09	BRCA
KRAS	p.G12V	Both	Clinical Trials	MEK inhibitors	FDA Approved	panitumumab	missense	TCGA-A5-A0GA-01A-11W-A062-09	UCEC
BRAF	p.V600E	Both	FDA Approved	vemurafenib, dabrafenib, trametinib, dabrafenib + trametinib	Clinical Trials	cetuximab, panitumumab	missense	TCGA-BJ-A0Z3-01A-11D-A13W-08	THCA
NRAS	p.Q61K	Both	Clinical Trials	MEK inhibitors	FDA Approved	cetuximab, panitumumab	missense	TCGA-EM-A3OA-01A-11D-A21Z-08	THCA
BRAF	p.V600E	Both	FDA Approved	vemurafenib, dabrafenib, trametinib, dabrafenib + trametinib	Clinical Trials	cetuximab, panitumumab	missense	TCGA-FW-A5DX-01A-11D-A27K-08	SKCM
MTOR	p.L1460P	Sensitive	Case Reports	rapamycin	NA	NA	missense	TCGA-B0-5701-01A-11D-1534-10	KIRC
IDH1	p.R132H	Sensitive	Case Reports	IDH1 inhibitor	NA	NA	missense	TCGA-HT-8106-01A-11D-2395-08	LGG
IDH1	p.R132H	Sensitive	Case Reports	IDH1 inhibitor	NA	NA	missense	TCGA-DU-6393-01A-11D-1705-08	LGG
PIK3CA	p.H1047R	Sensitive	Clinical Trials	PI3K/AKT/mTOR inhibitors	NA	NA	missense	TCGA-C8-A1HE-01A-11D-A188-09	BRCA
BRCA1	p.Q10*	Sensitive	FDA Approved	PARP inhibitors	NA	NA	nonsense	TCGA-18-3421-01A-01D-0983-08	LUSC
BRCA2	p.R2625*	Sensitive	FDA Approved	PARP inhibitors	NA	NA	nonsense	TCGA-BA-6870-01A-11D-1870-08	HNSC
KRAS	p.G12S	Both	Clinical Trials	MEK inhibitors	FDA Approved	panitumumab	missense	TCGA-97-8176-01A-11D-2393-08	LUAD
PIK3CA	p.E545K	Sensitive	Case Reports	mTOR inhibitors	NA	NA	missense	TCGA-FU-A3WB-01A-11D-A22X-09	CESC
IDH2	p.R140Q	Sensitive	Clinical Trials	IDH2 inhibitor	NA	NA	missense	TCGA-AB-2973-03A-01D-0739-09	LAML
NRAS	p.Q61K	Both	Clinical Trials	MEK inhibitors	FDA Approved	cetuximab, panitumumab	missense	TCGA-EE-A2GN-06A-11D-A196-08	SKCM
IDH1	p.R132H	Sensitive	Case Reports	IDH1 inhibitor	NA	NA	missense	TCGA-HT-8114-01A-11D-2395-08	LGG
NOTCH2	p.E2261D	Sensitive	Case Reports	Gamma secretase inhibitors	NA	NA	missense	TCGA-CV-6937-01A-11D-2012-08	HNSC
BRAF	p.V600E	Both	FDA Approved	vemurafenib, dabrafenib, trametinib, dabrafenib + trametinib	Clinical Trials	cetuximab, panitumumab	missense	TCGA-ET-A39K-01A-11D-A19J-08	THCA
PIK3CA	p.H1047R	Sensitive	Clinical Trials	PI3K/AKT/mTOR inhibitors	NA	NA	missense	TCGA-AR-A1AV-01A-21D-A12Q-09	BRCA
PDGFRA	p.R822H	Sensitive	Clinical Trials	imatinib	NA	NA	missense	TCGA-AR-A1AV-01A-21D-A12Q-09	BRCA
PIK3CA	p.E542K	Sensitive	Case Reports	mTOR inhibitors	NA	NA	missense	TCGA-GM-A2DI-01A-31D-A18P-09	BRCA
KRAS	p.G12V	Both	Clinical Trials	MEK inhibitors	FDA Approved	panitumumab	missense	TCGA-N5-A4RF-01A-11D-A28R-08	UCS
CTNNB1	p.S37C	Sensitive	Clinical Trials	everolimus + letrozole	NA	NA	missense	TCGA-UB-A7MC-01A-11D-A33Q-10	LIHC
BRAF	p.V600E	Both	FDA Approved	vemurafenib, dabrafenib, trametinib, dabrafenib + trametinib	Clinical Trials	cetuximab, panitumumab	missense	TCGA-EM-A22M-01A-11D-A17V-08	THCA
PDGFRA	p.W82R	Sensitive	Clinical Trials	imatinib	NA	NA	missense	TCGA-AP-A0LM-01A-11D-A122-09	UCEC
PDGFRA	p.S851L	Sensitive	Clinical Trials	imatinib	NA	NA	missense	TCGA-AP-A0LM-01A-11D-A122-09	UCEC
NOTCH2	p.R2347C	Sensitive	Case Reports	Gamma secretase inhibitors	NA	NA	missense	TCGA-AP-A0LM-01A-11D-A122-09	UCEC
KIT	p.P627L	Sensitive	FDA Approved	imatinib	NA	NA	missense	TCGA-AP-A0LM-01A-11D-A122-09	UCEC
PIK3CA	p.H1047R	Sensitive	Clinical Trials	PI3K/AKT/mTOR inhibitors	NA	NA	missense	TCGA-AO-A03M-01B-11D-A10M-09	BRCA
PIK3CA	p.H1047R	Sensitive	Clinical Trials	PI3K/AKT/mTOR inhibitors	NA	NA	missense	TCGA-N8-A4PM-01A-11D-A28R-08	UCS
IDH1	p.R132H	Sensitive	Case Reports	IDH1 inhibitor	NA	NA	missense	TCGA-DU-7302-01A-11D-2086-08	LGG
NRAS	p.Q61R	Both	Clinical Trials	MEK inhibitors	FDA Approved	cetuximab, panitumumab	missense	TCGA-EE-A2GP-06A-11D-A197-08	SKCM
IDH1	p.R132H	Sensitive	Case Reports	IDH1 inhibitor	NA	NA	missense	TCGA-HW-7490-01A-11D-2024-08	LGG
PIK3CA	p.E545K	Sensitive	Case Reports	mTOR inhibitors	NA	NA	missense	TCGA-66-2785-01A-01D-1522-08	LUSC
BRAF	p.V600E	Both	FDA Approved	vemurafenib, dabrafenib, trametinib, dabrafenib + trametinib	Clinical Trials	cetuximab, panitumumab	missense	TCGA-D9-A1JX-06A-11D-A19A-08	SKCM
KRAS	p.G12C	Both	Clinical Trials	MEK inhibitors	FDA Approved	panitumumab	missense	TCGA-55-8203-01A-11D-2238-08	LUAD
KRAS	p.G12V	Both	Clinical Trials	MEK inhibitors	FDA Approved	panitumumab	missense	TCGA-D1-A17H-01A-11D-A12J-09	UCEC
PIK3CA	p.E542K	Sensitive	Case Reports	mTOR inhibitors	NA	NA	missense	TCGA-CV-7422-01A-21D-2078-08	HNSC
ERBB2	p.L755S	Sensitive	Case Reports	neratinib	NA	NA	missense	TCGA-D8-A1XM-01A-21D-A14K-09	BRCA
PIK3CA	p.E542K	Sensitive	Case Reports	mTOR inhibitors	NA	NA	missense	TCGA-D8-A1XM-01A-21D-A14K-09	BRCA
IDH1	p.R132H	Sensitive	Case Reports	IDH1 inhibitor	NA	NA	missense	TCGA-HT-7687-01A-11D-2253-08	LGG
PIK3CA	p.E545K	Sensitive	Case Reports	mTOR inhibitors	NA	NA	missense	TCGA-06-0119-01A-08D-1490-08	GBM
PIK3CA	p.E545K	Sensitive	Case Reports	mTOR inhibitors	NA	NA	missense	TCGA-C5-A3HE-01A-21D-A22X-09	CESC
KRAS	p.G12V	Both	Clinical Trials	MEK inhibitors	FDA Approved	panitumumab	missense	TCGA-AG-3591-01A-01D-1733-10	COADREAD
PDGFRA	p.L593I	Sensitive	Clinical Trials	imatinib	NA	NA	missense	TCGA-33-4586-01A-01D-1441-08	LUSC
IDH1	p.R132H	Sensitive	Case Reports	IDH1 inhibitor	NA	NA	missense	TCGA-E1-5319-01A-01D-1893-08	LGG
BRAF	p.V600E	Both	FDA Approved	vemurafenib, dabrafenib, trametinib, dabrafenib + trametinib	Clinical Trials	cetuximab, panitumumab	missense	TCGA-D3-A5GT-01A-12D-A30X-08	SKCM
BRAF	p.V600E	Both	FDA Approved	vemurafenib, dabrafenib, trametinib, dabrafenib + trametinib	Clinical Trials	cetuximab, panitumumab	missense	TCGA-EE-A20B-06A-11D-A196-08	SKCM
HRAS	p.G12D	Sensitive	Case Reports	mTOR inhibitors	NA	NA	missense	TCGA-CV-6436-01A-11D-1683-08	HNSC
PIK3CA	p.E545K	Sensitive	Case Reports	mTOR inhibitors	NA	NA	missense	TCGA-AC-A3OD	BRCA
KRAS	p.G12C	Both	Clinical Trials	MEK inhibitors	FDA Approved	panitumumab	missense	TCGA-64-5774-01A-01D-1625-08	LUAD
BRAF	p.V600E	Both	FDA Approved	vemurafenib, dabrafenib, trametinib, dabrafenib + trametinib	Clinical Trials	cetuximab, panitumumab	missense	TCGA-E3-A3E5-01A-11D-A20C-08	THCA
PIK3CA	p.E542K	Sensitive	Case Reports	mTOR inhibitors	NA	NA	missense	TCGA-DG-A2KL-01A-11D-A17W-09	CESC
PIK3CA	p.E545K	Sensitive	Case Reports	mTOR inhibitors	NA	NA	missense	TCGA-AA-3660-01A-01D-1719-10	COADREAD
KRAS	p.A146T	Both	Case Reports	MEK inhibitors + PI3K pathway inhibitors	Clinical Trials	cetuximab, panitumumab	missense	TCGA-AA-3660-01A-01D-1719-10	COADREAD
BRAF	p.V600E	Both	FDA Approved	vemurafenib, dabrafenib, trametinib, dabrafenib + trametinib	Clinical Trials	cetuximab, panitumumab	missense	TCGA-BF-A3DJ-01A-11D-A20D-08	SKCM
NRAS	p.Q61L	Both	Clinical Trials	MEK inhibitors	FDA Approved	cetuximab, panitumumab	missense	TCGA-EE-A2A2-06A-11D-A196-08	SKCM
KRAS	p.G12V	Both	Clinical Trials	MEK inhibitors	FDA Approved	panitumumab	missense	TCGA-AX-A05W-01A-21W-A027-09	UCEC
IDH1	p.R132H	Sensitive	Case Reports	IDH1 inhibitor	NA	NA	missense	TCGA-DU-6394-01A-11D-1705-08	LGG
PIK3CA	p.H1047R	Sensitive	Clinical Trials	PI3K/AKT/mTOR inhibitors	NA	NA	missense	TCGA-AR-A2LJ-01A-12D-A19Y-09	BRCA
PIK3CA	p.E545K	Sensitive	Case Reports	mTOR inhibitors	NA	NA	missense	TCGA-EW-A3E8-01B-11D-A243-09	BRCA
PIK3CA	p.H1047R	Sensitive	Clinical Trials	PI3K/AKT/mTOR inhibitors	NA	NA	missense	TCGA-EW-A1IX-01A-12D-A142-09	BRCA
BRAF	p.V600E	Both	FDA Approved	vemurafenib, dabrafenib, trametinib, dabrafenib + trametinib	Clinical Trials	cetuximab, panitumumab	missense	TCGA-EL-A3H8-01A-11D-A20C-08	THCA
BRAF	p.V600E	Both	FDA Approved	vemurafenib, dabrafenib, trametinib, dabrafenib + trametinib	Clinical Trials	cetuximab, panitumumab	missense	TCGA-DJ-A1QN-01A-11D-A14W-08	THCA
KRAS	p.G12C	Both	Clinical Trials	MEK inhibitors	FDA Approved	panitumumab	missense	TCGA-55-7907-01A-11D-2167-08	LUAD
NRAS	p.Q61R	Both	Clinical Trials	MEK inhibitors	FDA Approved	cetuximab, panitumumab	missense	TCGA-DJ-A3UT-01A-11D-A22D-08	THCA
PIK3CA	p.H1047R	Sensitive	Clinical Trials	PI3K/AKT/mTOR inhibitors	NA	NA	missense	TCGA-D1-A0ZV-01A-11D-A10M-09	UCEC
MAP2K1	p.P124L	Both	Case Reports	ERK inhibitors	Clinical Trials	BRAF inhibitors	missense	TCGA-ER-A42H-01A-11D-A24R-08	SKCM
KIT	p.K642E	Sensitive	FDA Approved	imatinib	NA	NA	missense	TCGA-ER-A42H-01A-11D-A24R-08	SKCM
IDH1	p.R132H	Sensitive	Case Reports	IDH1 inhibitor	NA	NA	missense	TCGA-FG-5965-01B-11D-1893-08	LGG
IDH1	p.R132H	Sensitive	Case Reports	IDH1 inhibitor	NA	NA	missense	TCGA-P5-A5EV-01A-11D-A27K-08	LGG
BRAF	p.V600K	Sensitive	FDA Approved	dabrafenib, RAF inhibitor	NA	NA	missense	TCGA-QB-A6FS-06A-11D-A30X-08	SKCM
PIK3CA	p.E545K	Sensitive	Case Reports	mTOR inhibitors	NA	NA	missense	TCGA-F4-6809-01A-11D-1835-10	COADREAD
PIK3CA	p.H1047R	Sensitive	Clinical Trials	PI3K/AKT/mTOR inhibitors	NA	NA	missense	TCGA-C8-A12U-01A-11D-A10Y-09	BRCA
NRAS	p.Q61K	Both	Clinical Trials	MEK inhibitors	FDA Approved	cetuximab, panitumumab	missense	TCGA-D3-A51G-06A-11D-A25O-08	SKCM
NRAS	p.Q61R	Both	Clinical Trials	MEK inhibitors	FDA Approved	cetuximab, panitumumab	missense	TCGA-J8-A3O0-01A-11D-A21A-08	THCA
IDH1	p.R132H	Sensitive	Case Reports	IDH1 inhibitor	NA	NA	missense	TCGA-FG-A4MT-01A-11D-A26M-08	LGG
NRAS	p.Q61R	Both	Clinical Trials	MEK inhibitors	FDA Approved	cetuximab, panitumumab	missense	TCGA-D3-A5GO-06A-12D-A27K-08	SKCM
PIK3CA	p.H1047R	Sensitive	Clinical Trials	PI3K/AKT/mTOR inhibitors	NA	NA	missense	TCGA-AX-A1CP-01A-11D-A135-09	UCEC
IDH1	p.R132H	Sensitive	Case Reports	IDH1 inhibitor	NA	NA	missense	TCGA-DU-A5TU-01A-11D-A289-08	LGG
KRAS	p.G12S	Both	Clinical Trials	MEK inhibitors	FDA Approved	panitumumab	missense	TCGA-55-7576-01A-11D-2063-08	LUAD
FGFR2	p.W290C	Sensitive	Case Reports	FGFR inhibitors	NA	NA	missense	TCGA-60-2710-01A-01D-1522-08	LUSC
ERBB2	p.S310F	Sensitive	Case Reports	ERBB2 TKIs, trastuzumab	NA	NA	missense	TCGA-44-2656	LUAD
PIK3CA	p.H1047R	Sensitive	Clinical Trials	PI3K/AKT/mTOR inhibitors	NA	NA	missense	TCGA-A6-6780-01A-11D-1835-10	COADREAD
IDH1	p.R132H	Sensitive	Case Reports	IDH1 inhibitor	NA	NA	missense	TCGA-HT-7676-01A-11D-2395-08	LGG
EGFR	p.G598V	Sensitive	Case Reports	erlotinib	NA	NA	missense	TCGA-HT-A5RC-01A-11D-A289-08	LGG
PIK3CA	p.E545K	Sensitive	Case Reports	mTOR inhibitors	NA	NA	missense	TCGA-B6-A0RH-01A-21D-A10Y-09	BRCA
PIK3CA	p.E545K	Sensitive	Case Reports	mTOR inhibitors	NA	NA	missense	TCGA-AY-5543-01A-01D-1650-10	COADREAD
KRAS	p.G13D	Both	Clinical Trials	cetuximab	FDA Approved	panitumumab	missense	TCGA-AY-5543-01A-01D-1650-10	COADREAD
NRAS	p.G12D	Both	Case Reports	MEK inhibitors	FDA Approved	cetuximab, panitumumab	missense	TCGA-AB-2887-03A-01W-0732-08	LAML
KRAS	p.G12V	Both	Clinical Trials	MEK inhibitors	FDA Approved	panitumumab	missense	TCGA-B5-A11W-01A-12D-A122-09	UCEC
NRAS	p.Q61K	Both	Clinical Trials	MEK inhibitors	FDA Approved	cetuximab, panitumumab	missense	TCGA-ER-A2NE-06A-21D-A196-08	SKCM
NRAS	p.Q61K	Both	Clinical Trials	MEK inhibitors	FDA Approved	cetuximab, panitumumab	missense	TCGA-GN-A268-06A-11D-A196-08	SKCM
PIK3CA	p.H1047R	Sensitive	Clinical Trials	PI3K/AKT/mTOR inhibitors	NA	NA	missense	TCGA-A8-A06U-01A-11W-A019-09	BRCA
IDH1	p.R132H	Sensitive	Case Reports	IDH1 inhibitor	NA	NA	missense	TCGA-HT-A5RB-01A-11D-A289-08	LGG
IDH1	p.R132H	Sensitive	Case Reports	IDH1 inhibitor	NA	NA	missense	TCGA-HT-A616-01A-11D-A29Q-08	LGG
PIK3CA	p.H1047R	Sensitive	Clinical Trials	PI3K/AKT/mTOR inhibitors	NA	NA	missense	TCGA-CQ-6222-01A-11D-1912-08	HNSC
PIK3CA	p.H1047R	Sensitive	Clinical Trials	PI3K/AKT/mTOR inhibitors	NA	NA	missense	TCGA-A2-A0YL-01A-21D-A10G-09	BRCA
IDH1	p.R132H	Sensitive	Case Reports	IDH1 inhibitor	NA	NA	missense	TCGA-HT-8109-01A-11D-2395-08	LGG
BRAF	p.V600E	Both	FDA Approved	vemurafenib, dabrafenib, trametinib, dabrafenib + trametinib	Clinical Trials	cetuximab, panitumumab	missense	TCGA-BF-A1PU-01A-11D-A19A-08	SKCM
BRCA2	p.T2367fs	Sensitive	FDA Approved	PARP inhibitors	NA	NA	frame_shift_del_unspecified	TCGA-NF-A4WX-01A-11D-A28R-08	UCS
KRAS	p.G13D	Both	Clinical Trials	cetuximab	FDA Approved	panitumumab	missense	TCGA-F5-6571-01A-12D-1826-10	COADREAD
BRAF	p.V600E	Both	FDA Approved	vemurafenib, dabrafenib, trametinib, dabrafenib + trametinib	Clinical Trials	cetuximab, panitumumab	missense	TCGA-MK-A4N6-01A-11D-A257-08	THCA
HRAS	p.G12D	Sensitive	Case Reports	mTOR inhibitors	NA	NA	missense	TCGA-HD-A4C1-01A-11D-A24D-08	HNSC
PIK3CA	p.H1047R	Sensitive	Clinical Trials	PI3K/AKT/mTOR inhibitors	NA	NA	missense	TCGA-NA-A4QY-01A-11D-A28R-08	UCS
EGFR	p.S768I	Sensitive	FDA Approved	erlotinib, afatinib	NA	NA	missense	TCGA-50-6595-01A-12D-1855-08	LUAD
EGFR	p.G719A	Sensitive	FDA Approved	erlotinib, afatinib	NA	NA	missense	TCGA-50-6595-01A-12D-1855-08	LUAD
NRAS	p.Q61K	Both	Clinical Trials	MEK inhibitors	FDA Approved	cetuximab, panitumumab	missense	TCGA-RP-A694-06A-11D-A30X-08	SKCM
PIK3CA	p.H1047R	Sensitive	Clinical Trials	PI3K/AKT/mTOR inhibitors	NA	NA	missense	TCGA-41-2572-01A-01D-1353-08	GBM
NRAS	p.Q61R	Both	Clinical Trials	MEK inhibitors	FDA Approved	cetuximab, panitumumab	missense	TCGA-D9-A3Z1-06A-11D-A23B-08	SKCM
IDH1	p.R132H	Sensitive	Case Reports	IDH1 inhibitor	NA	NA	missense	TCGA-BT-A0YX-01A-11D-A10S-08	BLCA
BRAF	p.V600E	Both	FDA Approved	vemurafenib, dabrafenib, trametinib, dabrafenib + trametinib	Clinical Trials	cetuximab, panitumumab	missense	TCGA-EE-A3AB-06A-11D-A196-08	SKCM
EGFR	p.L858R	Sensitive	FDA Approved	erlotinib, afatinib	NA	NA	missense	TCGA-97-A4M1-01A-11D-A24P-08	LUAD
BRAF	p.V600E	Both	FDA Approved	vemurafenib, dabrafenib, trametinib, dabrafenib + trametinib	Clinical Trials	cetuximab, panitumumab	missense	TCGA-DA-A1I4-06A-11D-A196-08	SKCM
BRAF	p.V600E	Both	FDA Approved	vemurafenib, dabrafenib, trametinib, dabrafenib + trametinib	Clinical Trials	cetuximab, panitumumab	missense	TCGA-91-A4BD-01A-11D-A24D-08	LUAD
BRAF	p.V600E	Both	FDA Approved	vemurafenib, dabrafenib, trametinib, dabrafenib + trametinib	Clinical Trials	cetuximab, panitumumab	missense	TCGA-EL-A3T8-01A-21D-A22D-08	THCA
AKT1	p.E17K	Sensitive	Clinical Trials	AKT inhibitors	NA	NA	missense	TCGA-BH-A0BR-01A-21W-A12T-09	BRCA
FLT3	p.D835Y	Both	Preclinical	lestaurtinib	Case Reports	sorafenib	missense	TCGA-AB-2811-03B-01W-0728-08	LAML
NRAS	p.Q61R	Both	Clinical Trials	MEK inhibitors	FDA Approved	cetuximab, panitumumab	missense	TCGA-D3-A51R-06A-11D-A25O-08	SKCM
BRAF	p.V600E	Both	FDA Approved	vemurafenib, dabrafenib, trametinib, dabrafenib + trametinib	Clinical Trials	cetuximab, panitumumab	missense	TCGA-EB-A4P0-01A-41D-A25O-08	SKCM
KRAS	p.G12D	Both	Clinical Trials	MEK inhibitors	FDA Approved	panitumumab	missense	TCGA-69-8253-01A-11D-2284-08	LUAD
PIK3CA	p.H1047R	Sensitive	Clinical Trials	PI3K/AKT/mTOR inhibitors	NA	NA	missense	TCGA-BH-A0DL-01A-11D-A10Y-09	BRCA
BRAF	p.V600E	Both	FDA Approved	vemurafenib, dabrafenib, trametinib, dabrafenib + trametinib	Clinical Trials	cetuximab, panitumumab	missense	TCGA-62-A472-01A-11D-A24D-08	LUAD
BRCA2	p.P1088fs	Sensitive	FDA Approved	PARP inhibitors	NA	NA	frame_shift_del_unspecified	TCGA-CD-8529-01A-11D-2340-08	STAD
BRAF	p.V600E	Both	FDA Approved	vemurafenib, dabrafenib, trametinib, dabrafenib + trametinib	Clinical Trials	cetuximab, panitumumab	missense	TCGA-FW-A3TV-06A-11D-A23B-08	SKCM
NOTCH1	p.Q2487L	Sensitive	Clinical Trials	steroids early setting	NA	NA	missense	TCGA-BH-A18V-01A-11D-A12B-09	BRCA
KRAS	p.G12D	Both	Clinical Trials	MEK inhibitors	FDA Approved	panitumumab	missense	TCGA-86-8056-01A-11D-2238-08	LUAD
BRAF	p.V600E	Both	FDA Approved	vemurafenib, dabrafenib, trametinib, dabrafenib + trametinib	Clinical Trials	cetuximab, panitumumab	missense	TCGA-EE-A2GE-06A-11D-A196-08	SKCM
BRAF	p.V600E	Both	FDA Approved	vemurafenib, dabrafenib, trametinib, dabrafenib + trametinib	Clinical Trials	cetuximab, panitumumab	missense	TCGA-FY-A3ON-01A-11D-A21Z-08	THCA
PIK3CA	p.H1047R	Sensitive	Clinical Trials	PI3K/AKT/mTOR inhibitors	NA	NA	missense	TCGA-A2-A25C-01A-11D-A167-09	BRCA
BRAF	p.V600E	Both	FDA Approved	vemurafenib, dabrafenib, trametinib, dabrafenib + trametinib	Clinical Trials	cetuximab, panitumumab	missense	TCGA-EL-A3GY-01A-21D-A202-08	THCA
KRAS	p.G13D	Both	Clinical Trials	cetuximab	FDA Approved	panitumumab	missense	TCGA-D5-6927-01A-21D-1924-10	COADREAD
PIK3CA	p.E545K	Sensitive	Case Reports	mTOR inhibitors	NA	NA	missense	TCGA-BH-A0BV-01A-11W-A019-09	BRCA
PIK3CA	p.E545K	Sensitive	Case Reports	mTOR inhibitors	NA	NA	missense	TCGA-AH-6544-01A-11D-1826-10	COADREAD
KRAS	p.G12V	Both	Clinical Trials	MEK inhibitors	FDA Approved	panitumumab	missense	TCGA-AH-6544-01A-11D-1826-10	COADREAD
HRAS	p.G12S	Sensitive	Case Reports	mTOR inhibitors	NA	NA	missense	TCGA-CQ-7063-01A-11D-2394-08	HNSC
PIK3CA	p.E545K	Sensitive	Case Reports	mTOR inhibitors	NA	NA	missense	TCGA-E9-A249-01A-11D-A167-09	BRCA
BRAF	p.V600E	Both	FDA Approved	vemurafenib, dabrafenib, trametinib, dabrafenib + trametinib	Clinical Trials	cetuximab, panitumumab	missense	TCGA-E8-A415-01A-11D-A23M-08	THCA
PDGFRA	p.H570Y	Sensitive	Clinical Trials	imatinib	NA	NA	missense	TCGA-AD-6895-01A-11D-1924-10	COADREAD
KRAS	p.Q61K	Both	Clinical Trials	MEK inhibitors	FDA Approved	panitumumab	missense	TCGA-AD-6895-01A-11D-1924-10	COADREAD
BRAF	p.V600E	Both	FDA Approved	vemurafenib, dabrafenib, trametinib, dabrafenib + trametinib	Clinical Trials	cetuximab, panitumumab	missense	TCGA-DJ-A2PO-01A-21D-A19J-08	THCA
KRAS	p.G12C	Both	Clinical Trials	MEK inhibitors	FDA Approved	panitumumab	missense	TCGA-69-7973-01A-11D-2184-08	LUAD
BRAF	p.V600E	Both	FDA Approved	vemurafenib, dabrafenib, trametinib, dabrafenib + trametinib	Clinical Trials	cetuximab, panitumumab	missense	TCGA-EM-A22O-01A-11D-A17V-08	THCA
PIK3CA	p.H1047R	Sensitive	Clinical Trials	PI3K/AKT/mTOR inhibitors	NA	NA	missense	TCGA-BH-A0W7-01A-11D-A10Y-09	BRCA
IDH1	p.R132H	Sensitive	Case Reports	IDH1 inhibitor	NA	NA	missense	TCGA-FG-A4MX-01A-11D-A26M-08	LGG
EGFR	p.A289V	Sensitive	Case Reports	erlotinib	NA	NA	missense	TCGA-12-3650-01A-01D-1495-08	GBM
PIK3CA	p.E545K	Sensitive	Case Reports	mTOR inhibitors	NA	NA	missense	TCGA-E2-A153-01A-12D-A12B-09	BRCA
KRAS	p.G13D	Both	Clinical Trials	cetuximab	FDA Approved	panitumumab	missense	TCGA-AZ-6599-01A-11D-1771-10	COADREAD
GNAS	p.R201C	Sensitive	Case Reports	JAK inhibitors	NA	NA	missense	TCGA-AZ-6599-01A-11D-1771-10	COADREAD
PIK3CA	p.E545K	Sensitive	Case Reports	mTOR inhibitors	NA	NA	missense	TCGA-BG-A0W2-01A-11D-A117-09	UCEC
EGFR	p.R108K	Sensitive	Case Reports	erlotinib	NA	NA	missense	TCGA-HT-8107-01A-13D-2395-08	LGG
KRAS	p.G13D	Both	Clinical Trials	cetuximab	FDA Approved	panitumumab	missense	TCGA-AF-6655-01A-11D-1826-10	COADREAD
AKT1	p.E17K	Sensitive	Clinical Trials	AKT inhibitors	NA	NA	missense	TCGA-ER-A198-06A-11D-A196-08	SKCM
BRAF	p.V600E	Both	FDA Approved	vemurafenib, dabrafenib, trametinib, dabrafenib + trametinib	Clinical Trials	cetuximab, panitumumab	missense	TCGA-ER-A198-06A-11D-A196-08	SKCM
KRAS	p.G12A	Both	Clinical Trials	MEK inhibitors	FDA Approved	panitumumab	missense	TCGA-50-8457-01A-11D-2323-08	LUAD
BRAF	p.V600E	Both	FDA Approved	vemurafenib, dabrafenib, trametinib, dabrafenib + trametinib	Clinical Trials	cetuximab, panitumumab	missense	TCGA-EE-A2MP-06A-11D-A197-08	SKCM
KRAS	p.G12C	Both	Clinical Trials	MEK inhibitors	FDA Approved	panitumumab	missense	TCGA-44-7671-01A-11D-2063-08	LUAD
IDH1	p.R132H	Sensitive	Case Reports	IDH1 inhibitor	NA	NA	missense	TCGA-HT-7690-01A-11D-2253-08	LGG
PIK3CA	p.H1047R	Sensitive	Clinical Trials	PI3K/AKT/mTOR inhibitors	NA	NA	missense	TCGA-E2-A1L8-01A-11D-A13L-09	BRCA
NRAS	p.Q61R	Both	Clinical Trials	MEK inhibitors	FDA Approved	cetuximab, panitumumab	missense	TCGA-HR-A2OG-01A-21D-A197-08	SKCM
IDH1	p.R132H	Sensitive	Case Reports	IDH1 inhibitor	NA	NA	missense	TCGA-FG-7636-01A-11D-2086-08	LGG
KRAS	p.G12C	Both	Clinical Trials	MEK inhibitors	FDA Approved	panitumumab	missense	TCGA-97-A4M5-01A-11D-A24P-08	LUAD
MTOR	p.S2215Y	Sensitive	Case Reports	rapamycin	NA	NA	missense	TCGA-BG-A0VX-01A-11D-A122-09	UCEC
MTOR	p.S2215Y	Sensitive	Case Reports	rapamycin	NA	NA	missense	TCGA-BS-A0UV-01A-11D-A10B-09	UCEC
BRCA2	p.E1441*	Sensitive	FDA Approved	PARP inhibitors	NA	NA	nonsense	TCGA-BS-A0UV-01A-11D-A10B-09	UCEC
FGFR2	p.N550H	Both	Case Reports	ponatinib	Preclinical	Dovitinib	missense	TCGA-BS-A0UV-01A-11D-A10B-09	UCEC
BRCA1	p.G239*	Sensitive	FDA Approved	PARP inhibitors	NA	NA	nonsense	TCGA-44-8117-01A-11D-2238-08	LUAD
IDH1	p.R132H	Sensitive	Case Reports	IDH1 inhibitor	NA	NA	missense	TCGA-AB-2949-03A-01W-0733-08	LAML
NRAS	p.Q61K	Both	Clinical Trials	MEK inhibitors	FDA Approved	cetuximab, panitumumab	missense	TCGA-BW-A5NP-01A-11D-A27I-10	LIHC
BRAF	p.V600E	Both	FDA Approved	vemurafenib, dabrafenib, trametinib, dabrafenib + trametinib	Clinical Trials	cetuximab, panitumumab	missense	TCGA-EM-A3FK-01A-11D-A21A-08	THCA
IDH1	p.R132H	Sensitive	Case Reports	IDH1 inhibitor	NA	NA	missense	TCGA-HT-7601-01A-11D-2086-08	LGG
NOTCH1	p.G2345V	Sensitive	Clinical Trials	steroids early setting	NA	NA	missense	TCGA-78-7148-01A-11D-2036-08	LUAD
KRAS	p.G12C	Both	Clinical Trials	MEK inhibitors	FDA Approved	panitumumab	missense	TCGA-78-7148-01A-11D-2036-08	LUAD
KRAS	p.G13D	Both	Clinical Trials	cetuximab	FDA Approved	panitumumab	missense	TCGA-EI-6512-01A-11D-1733-10	COADREAD
PIK3CA	p.H1047R	Sensitive	Clinical Trials	PI3K/AKT/mTOR inhibitors	NA	NA	missense	TCGA-D8-A1JJ-01A-31D-A14K-09	BRCA
KRAS	p.G13D	Both	Clinical Trials	cetuximab	FDA Approved	panitumumab	missense	TCGA-DD-A3A4-01A-11D-A22F-10	LIHC
KRAS	p.G13D	Both	Clinical Trials	cetuximab	FDA Approved	panitumumab	missense	TCGA-A6-6138-01A-11D-1771-10	COADREAD
BRAF	p.G469A	Both	Case Reports	EGFR TKIs + MEK inhibitors in EGFR mutant	Case Reports	EGFR TKIs	missense	TCGA-G9-6498-01A-12D-A30X-08	PRAD
BRAF	p.V600E	Both	FDA Approved	vemurafenib, dabrafenib, trametinib, dabrafenib + trametinib	Clinical Trials	cetuximab, panitumumab	missense	TCGA-DJ-A2Q9-01A-21D-A18F-08	THCA
NRAS	p.Q61K	Both	Clinical Trials	MEK inhibitors	FDA Approved	cetuximab, panitumumab	missense	TCGA-EE-A2GU-06A-11D-A196-08	SKCM
BRAF	p.V600E	Both	FDA Approved	vemurafenib, dabrafenib, trametinib, dabrafenib + trametinib	Clinical Trials	cetuximab, panitumumab	missense	TCGA-06-1806-01A-02D-1845-08	GBM
NRAS	p.Q61K	Both	Clinical Trials	MEK inhibitors	FDA Approved	cetuximab, panitumumab	missense	TCGA-KN-8427-01A-11D-2310-10	KICH
GNA11	p.Q209L	Sensitive	Clinical Trials	selumetinib	NA	NA	missense	TCGA-ER-A3ET-06A-11D-A20D-08	SKCM
EGFR	p.L858R	Sensitive	FDA Approved	erlotinib, afatinib	NA	NA	missense	TCGA-86-8075-01A-11D-2238-08	LUAD
BRAF	p.V600E	Both	FDA Approved	vemurafenib, dabrafenib, trametinib, dabrafenib + trametinib	Clinical Trials	cetuximab, panitumumab	missense	TCGA-EL-A3T7-01A-11D-A22D-08	THCA
PIK3CA	p.E542K	Sensitive	Case Reports	mTOR inhibitors	NA	NA	missense	TCGA-CV-6952-01A-11D-1912-08	HNSC
KRAS	p.G12V	Both	Clinical Trials	MEK inhibitors	FDA Approved	panitumumab	missense	TCGA-17-Z033-01A-01W-0746-08	LUAD
PIK3CA	p.E542K	Sensitive	Case Reports	mTOR inhibitors	NA	NA	missense	TCGA-A5-A0GM-01A-11W-A062-09	UCEC
KRAS	p.G12D	Both	Clinical Trials	MEK inhibitors	FDA Approved	panitumumab	missense	TCGA-D1-A17A-01A-11D-A12J-09	UCEC
BRAF	p.V600E	Both	FDA Approved	vemurafenib, dabrafenib, trametinib, dabrafenib + trametinib	Clinical Trials	cetuximab, panitumumab	missense	TCGA-L6-A4EU-01A-11D-A257-08	THCA
KRAS	p.Q61R	Both	Clinical Trials	MEK inhibitors	FDA Approved	panitumumab	missense	TCGA-A6-5664-01A-21D-1835-10	COADREAD
NRAS	p.Q61R	Both	Clinical Trials	MEK inhibitors	FDA Approved	cetuximab, panitumumab	missense	TCGA-BF-A5EO-01A-12D-A27K-08	SKCM
BRAF	p.V600E	Both	FDA Approved	vemurafenib, dabrafenib, trametinib, dabrafenib + trametinib	Clinical Trials	cetuximab, panitumumab	missense	TCGA-E8-A242-01A-21D-A16O-08	THCA
IDH1	p.R132H	Sensitive	Case Reports	IDH1 inhibitor	NA	NA	missense	TCGA-G9-7523-01A-11D-2260-08	PRAD
EGFR	p.775in_frame_insHV	Both	Clinical Trials	HSP90 inhibitors	FDA Approved	gefitinib	in_frame_ins	TCGA-06-6695-01A-11D-1845-08	GBM
PIK3CA	p.E542K	Sensitive	Case Reports	mTOR inhibitors	NA	NA	missense	TCGA-E2-A156-01A-11D-A12B-09	BRCA
BRAF	p.V600E	Both	FDA Approved	vemurafenib, dabrafenib, trametinib, dabrafenib + trametinib	Clinical Trials	cetuximab, panitumumab	missense	TCGA-G4-6299-01A-11D-1771-10	COADREAD
BRAF	p.V600E	Both	FDA Approved	vemurafenib, dabrafenib, trametinib, dabrafenib + trametinib	Clinical Trials	cetuximab, panitumumab	missense	TCGA-FE-A23A-01A-11D-A17V-08	THCA
EGFR	p.L861Q	Sensitive	FDA Approved	erlotinib, afatinib	NA	NA	missense	TCGA-78-7147-01A-11D-2036-08	LUAD
IDH1	p.R132H	Sensitive	Case Reports	IDH1 inhibitor	NA	NA	missense	TCGA-DU-7008-01A-11D-2024-08	LGG
PDGFRA	p.R558C	Sensitive	Clinical Trials	imatinib	NA	NA	missense	TCGA-CR-6471-01A-11D-1870-08	HNSC
IDH1	p.R132H	Sensitive	Case Reports	IDH1 inhibitor	NA	NA	missense	TCGA-HT-7480-01A-11D-2086-08	LGG
KRAS	p.G13D	Both	Clinical Trials	cetuximab	FDA Approved	panitumumab	missense	TCGA-BR-4280-01A-01D-1126-08	STAD
BRAF	p.G466V	Sensitive	Case Reports	dasatinib	NA	NA	missense	TCGA-05-4410-01A-21D-1855-08	LUAD
BRCA1	p.Q1242*	Sensitive	FDA Approved	PARP inhibitors	NA	NA	nonsense	TCGA-04-1357	OV
PIK3CA	p.E545K	Sensitive	Case Reports	mTOR inhibitors	NA	NA	missense	TCGA-D8-A146-01A-31D-A10Y-09	BRCA
PIK3CA	p.E545K	Sensitive	Case Reports	mTOR inhibitors	NA	NA	missense	TCGA-33-4583-01A-01D-1441-08	LUSC
PIK3CA	p.H1047R	Sensitive	Clinical Trials	PI3K/AKT/mTOR inhibitors	NA	NA	missense	TCGA-AN-A0XL-01A-11D-A10M-09	BRCA
ERBB3	p.G284R	Sensitive	Preclinical	afatinib	NA	NA	missense	TCGA-D1-A1NU-01A-11D-A14G-09	UCEC
PIK3CA	p.E542K	Sensitive	Case Reports	mTOR inhibitors	NA	NA	missense	TCGA-93-7348-01A-21D-2036-08	LUAD
NOTCH1	p.P2417A	Sensitive	Clinical Trials	steroids early setting	NA	NA	missense	TCGA-13-0761	OV
BRAF	p.V600E	Both	FDA Approved	vemurafenib, dabrafenib, trametinib, dabrafenib + trametinib	Clinical Trials	cetuximab, panitumumab	missense	TCGA-EM-A1CT-01A-11D-A13W-08	THCA
BRCA2	p.S1341*	Sensitive	FDA Approved	PARP inhibitors	NA	NA	nonsense	TCGA-GU-A42R-01A-11D-A23M-08	BLCA
BRAF	p.V600E	Both	FDA Approved	vemurafenib, dabrafenib, trametinib, dabrafenib + trametinib	Clinical Trials	cetuximab, panitumumab	missense	TCGA-ET-A39O-01A-11D-A19J-08	THCA
PIK3CA	p.E545K	Sensitive	Case Reports	mTOR inhibitors	NA	NA	missense	TCGA-EA-A50E-01A-21D-A26G-09	CESC
NRAS	p.Q61R	Both	Clinical Trials	MEK inhibitors	FDA Approved	cetuximab, panitumumab	missense	TCGA-BS-A0TD-01A-11D-A10B-09	UCEC
KIT	p.L631F	Sensitive	FDA Approved	imatinib	NA	NA	missense	TCGA-BA-6871-01A-11D-1870-08	HNSC
PIK3CA	p.E545K	Sensitive	Case Reports	mTOR inhibitors	NA	NA	missense	TCGA-AQ-A54O-01A-11D-A25Q-09	BRCA
BRAF	p.V600E	Both	FDA Approved	vemurafenib, dabrafenib, trametinib, dabrafenib + trametinib	Clinical Trials	cetuximab, panitumumab	missense	TCGA-IM-A3U3-01A-11D-A22D-08	THCA
PIK3CA	p.E545K	Sensitive	Case Reports	mTOR inhibitors	NA	NA	missense	TCGA-AO-A126-01A-11D-A10M-09	BRCA
BRAF	p.V600E	Both	FDA Approved	vemurafenib, dabrafenib, trametinib, dabrafenib + trametinib	Clinical Trials	cetuximab, panitumumab	missense	TCGA-D3-A2JK-06A-11D-A196-08	SKCM
ERBB2	p.D769H	Sensitive	Case Reports	trastuzumab, lapatinib, neratinib	NA	NA	missense	TCGA-C8-A135-01A-11D-A10Y-09	BRCA
KIT	p.K642E	Sensitive	FDA Approved	imatinib	NA	NA	missense	TCGA-D3-A1Q3-06A-11D-A196-08	SKCM
BRCA1	p.E424*	Sensitive	FDA Approved	PARP inhibitors	NA	NA	nonsense	TCGA-A2-A25B-01A-11D-A167-09	BRCA
KRAS	p.G12A	Both	Clinical Trials	MEK inhibitors	FDA Approved	panitumumab	missense	TCGA-83-5908-01A-21D-2284-08	LUAD
EGFR	p.L858R	Sensitive	FDA Approved	erlotinib, afatinib	NA	NA	missense	TCGA-71-8520-01A-11D-2393-08	LUAD
KRAS	p.G12V	Both	Clinical Trials	MEK inhibitors	FDA Approved	panitumumab	missense	TCGA-AG-3731-01A-11D-1733-10	COADREAD
BRAF	p.V600E	Both	FDA Approved	vemurafenib, dabrafenib, trametinib, dabrafenib + trametinib	Clinical Trials	cetuximab, panitumumab	missense	TCGA-EM-A3FO-01A-11D-A21A-08	THCA
NRAS	p.Q61K	Both	Clinical Trials	MEK inhibitors	FDA Approved	cetuximab, panitumumab	missense	TCGA-ER-A19D-06A-11D-A197-08	SKCM
BRAF	p.V600E	Both	FDA Approved	vemurafenib, dabrafenib, trametinib, dabrafenib + trametinib	Clinical Trials	cetuximab, panitumumab	missense	TCGA-EM-A3FM-01A-11D-A21A-08	THCA
PIK3CA	p.E545K	Sensitive	Case Reports	mTOR inhibitors	NA	NA	missense	TCGA-HU-A4GU-01A-11D-A25D-08	STAD
NOTCH2	p.G2446V	Sensitive	Case Reports	Gamma secretase inhibitors	NA	NA	missense	TCGA-HU-A4GU-01A-11D-A25D-08	STAD
PIK3CA	p.E542K	Sensitive	Case Reports	mTOR inhibitors	NA	NA	missense	TCGA-OL-A5S0-01A-11D-A28B-09	BRCA
HRAS	p.G12S	Sensitive	Case Reports	mTOR inhibitors	NA	NA	missense	TCGA-H7-8501-01A-11D-2394-08	HNSC
KRAS	p.G12D	Both	Clinical Trials	MEK inhibitors	FDA Approved	panitumumab	missense	TCGA-C5-A1ME-01A-11D-A13W-08	CESC
NOTCH1	p.Q1694H	Sensitive	Clinical Trials	steroids early setting	NA	NA	missense	TCGA-BQ-7044-01A-11D-1961-08	KIRP
KRAS	p.G12S	Both	Clinical Trials	MEK inhibitors	FDA Approved	panitumumab	missense	TCGA-G4-6625-01A-21D-1771-10	COADREAD
PIK3CA	p.E545K	Sensitive	Case Reports	mTOR inhibitors	NA	NA	missense	TCGA-E2-A10C-01A-21D-A10M-09	BRCA
NRAS	p.Q61K	Both	Clinical Trials	MEK inhibitors	FDA Approved	cetuximab, panitumumab	missense	TCGA-EE-A3AC-06A-11D-A196-08	SKCM
KRAS	p.G12C	Both	Clinical Trials	MEK inhibitors	FDA Approved	panitumumab	missense	TCGA-05-4415-01A-22D-1855-08	LUAD
KRAS	p.G12A	Both	Clinical Trials	MEK inhibitors	FDA Approved	panitumumab	missense	TCGA-86-8359-01A-11D-2323-08	LUAD
IDH2	p.R140Q	Sensitive	Clinical Trials	IDH2 inhibitor	NA	NA	missense	TCGA-AB-2877-03A-01W-0732-08	LAML
EGFR	p.ELREA746in_frame_del	Sensitive	FDA Approved	erlotinib, afatinib	NA	NA	in_frame_del	TCGA-97-8552-01A-11D-2393-08	LUAD
KRAS	p.G12D	Both	Clinical Trials	MEK inhibitors	FDA Approved	panitumumab	missense	TCGA-AG-A015-01A-01W-A005-10	COADREAD
KRAS	p.G12V	Both	Clinical Trials	MEK inhibitors	FDA Approved	panitumumab	missense	TCGA-A5-A0VO-01A-21D-A10G-09	UCEC
BRAF	p.V600E	Both	FDA Approved	vemurafenib, dabrafenib, trametinib, dabrafenib + trametinib	Clinical Trials	cetuximab, panitumumab	missense	TCGA-EB-A24C-01A-11D-A197-08	SKCM
NOTCH2	p.S2153T	Sensitive	Case Reports	Gamma secretase inhibitors	NA	NA	missense	TCGA-BQ-7060-01A-11D-1961-08	KIRP
ERBB2	p.S310F	Sensitive	Case Reports	ERBB2 TKIs, trastuzumab	NA	NA	missense	TCGA-A2-A3XV-01A-21D-A23C-09	BRCA
ERBB3	p.G284R	Sensitive	Preclinical	afatinib	NA	NA	missense	TCGA-A2-A3XV-01A-21D-A23C-09	BRCA
PIK3CA	p.E545K	Sensitive	Case Reports	mTOR inhibitors	NA	NA	missense	TCGA-EK-A2PG-01A-11D-A18J-09	CESC
PIK3CA	p.E545K	Sensitive	Case Reports	mTOR inhibitors	NA	NA	missense	TCGA-C8-A12N-01A-11D-A10Y-09	BRCA
PIK3CA	p.E545K	Sensitive	Case Reports	mTOR inhibitors	NA	NA	missense	TCGA-CR-7399-01A-11D-2012-08	HNSC
BRAF	p.V600E	Both	FDA Approved	vemurafenib, dabrafenib, trametinib, dabrafenib + trametinib	Clinical Trials	cetuximab, panitumumab	missense	TCGA-FS-A1YY-06A-11D-A197-08	SKCM
KRAS	p.G12S	Both	Clinical Trials	MEK inhibitors	FDA Approved	panitumumab	missense	TCGA-BR-8679-01A-11D-2394-08	STAD
KRAS	p.G12V	Both	Clinical Trials	MEK inhibitors	FDA Approved	panitumumab	missense	TCGA-91-6828-01A-11D-1855-08	LUAD
AKT1	p.E17K	Sensitive	Clinical Trials	AKT inhibitors	NA	NA	missense	TCGA-E2-A1L9-01A-11D-A13L-09	BRCA
PIK3CA	p.H1047R	Sensitive	Clinical Trials	PI3K/AKT/mTOR inhibitors	NA	NA	missense	TCGA-E9-A229-01A-31D-A17G-09	BRCA
KIT	p.L637H	Sensitive	FDA Approved	imatinib	NA	NA	missense	TCGA-04-1646	OV
BRCA2	p.E2906*	Sensitive	FDA Approved	PARP inhibitors	NA	NA	nonsense	TCGA-29-1762	OV
BRAF	p.V600E	Both	FDA Approved	vemurafenib, dabrafenib, trametinib, dabrafenib + trametinib	Clinical Trials	cetuximab, panitumumab	missense	TCGA-DO-A2HM-01B-11D-A22D-08	THCA
FGFR2	p.R550W	Both	Case Reports	ponatinib	Preclinical	dovitinib	missense	TCGA-OR-A5K1-01A-11D-A29I-10	ACC
PIK3CA	p.E545K	Sensitive	Case Reports	mTOR inhibitors	NA	NA	missense	TCGA-BH-A42V-01A-11D-A243-09	BRCA
KRAS	p.G12D	Both	Clinical Trials	MEK inhibitors	FDA Approved	panitumumab	missense	TCGA-F4-6461-01A-11D-1771-10	COADREAD
PIK3CA	p.E542K	Sensitive	Case Reports	mTOR inhibitors	NA	NA	missense	TCGA-E2-A1IN-01A-11D-A13L-09	BRCA
BRAF	p.V600E	Both	FDA Approved	vemurafenib, dabrafenib, trametinib, dabrafenib + trametinib	Clinical Trials	cetuximab, panitumumab	missense	TCGA-FS-A1YX-06A-11D-A197-08	SKCM
CTNNB1	p.D32V	Sensitive	Clinical Trials	everolimus + letrozole	NA	NA	missense	TCGA-CC-A7IL-01A-11D-A33Q-10	LIHC
PIK3CA	p.E545K	Sensitive	Case Reports	mTOR inhibitors	NA	NA	missense	TCGA-N5-A4R8-01A-11D-A28R-08	UCS
BRAF	p.V600E	Both	FDA Approved	vemurafenib, dabrafenib, trametinib, dabrafenib + trametinib	Clinical Trials	cetuximab, panitumumab	missense	TCGA-EL-A3D0-01A-12D-A202-08	THCA
PIK3CA	p.H1047R	Sensitive	Clinical Trials	PI3K/AKT/mTOR inhibitors	NA	NA	missense	TCGA-CN-6024-01A-11D-1683-08	HNSC
NRAS	p.Q61R	Both	Clinical Trials	MEK inhibitors	FDA Approved	cetuximab, panitumumab	missense	TCGA-FS-A1ZQ-06A-11D-A197-08	SKCM
PIK3CA	p.H1047R	Sensitive	Clinical Trials	PI3K/AKT/mTOR inhibitors	NA	NA	missense	TCGA-BH-A203-01A-12D-A167-09	BRCA
EGFR	p.ELREA746in_frame_del	Sensitive	FDA Approved	erlotinib, afatinib	NA	NA	in_frame_del	TCGA-38-6178-01A-11D-1753-08	LUAD
PIK3CA	p.E542K	Sensitive	Case Reports	mTOR inhibitors	NA	NA	missense	TCGA-50-5044-01A-21D-1855-08	LUAD
BRAF	p.V600E	Both	FDA Approved	vemurafenib, dabrafenib, trametinib, dabrafenib + trametinib	Clinical Trials	cetuximab, panitumumab	missense	TCGA-DJ-A3UW-01A-11D-A22D-08	THCA
EGFR	p.A289V	Sensitive	Case Reports	erlotinib	NA	NA	missense	TCGA-06-0747-01A-01W-0348-08	GBM
KRAS	p.A146T	Both	Case Reports	MEK inhibitors + PI3K pathway inhibitors	Clinical Trials	cetuximab, panitumumab	missense	TCGA-AZ-4315	COADREAD
BRAF	p.V600E	Both	FDA Approved	vemurafenib, dabrafenib, trametinib, dabrafenib + trametinib	Clinical Trials	cetuximab, panitumumab	missense	TCGA-DJ-A3UX-01A-11D-A22D-08	THCA
KRAS	p.G13C	Both	Clinical Trials	MEK inhibitors	FDA Approved	panitumumab	missense	TCGA-99-8033-01A-11D-2238-08	LUAD
PIK3CA	p.E545K	Sensitive	Case Reports	mTOR inhibitors	NA	NA	missense	TCGA-BP-4160-01A-02D-1366-10	KIRC
PIK3CA	p.E545K	Sensitive	Case Reports	mTOR inhibitors	NA	NA	missense	TCGA-CQ-A4CG-01A-11D-A25Y-08	HNSC
PIK3CA	p.H1047R	Sensitive	Clinical Trials	PI3K/AKT/mTOR inhibitors	NA	NA	missense	TCGA-DD-A3A1-01A-11D-A20W-10	LIHC
IDH1	p.R132H	Sensitive	Case Reports	IDH1 inhibitor	NA	NA	missense	TCGA-HW-7489-01A-11D-2024-08	LGG
BRAF	p.V600E	Both	FDA Approved	vemurafenib, dabrafenib, trametinib, dabrafenib + trametinib	Clinical Trials	cetuximab, panitumumab	missense	TCGA-D3-A3MO-06A-11D-A21A-08	SKCM
KRAS	p.G12C	Both	Clinical Trials	MEK inhibitors	FDA Approved	panitumumab	missense	TCGA-55-8508-01A-11D-2393-08	LUAD
PIK3CA	p.E545K	Sensitive	Case Reports	mTOR inhibitors	NA	NA	missense	TCGA-D8-A1XS-01A-11D-A14K-09	BRCA
NRAS	p.Q61L	Both	Clinical Trials	MEK inhibitors	FDA Approved	cetuximab, panitumumab	missense	TCGA-DA-A1I1-06A-12D-A196-08	SKCM
IDH1	p.R132H	Sensitive	Case Reports	IDH1 inhibitor	NA	NA	missense	TCGA-HT-A614-01A-11D-A29Q-08	LGG
BRAF	p.V600E	Both	FDA Approved	vemurafenib, dabrafenib, trametinib, dabrafenib + trametinib	Clinical Trials	cetuximab, panitumumab	missense	TCGA-EB-A3XE-01A-12D-A23B-08	SKCM
PIK3CA	p.E545K	Sensitive	Case Reports	mTOR inhibitors	NA	NA	missense	TCGA-A8-A08P-01A-11W-A019-09	BRCA
KRAS	p.G12V	Both	Clinical Trials	MEK inhibitors	FDA Approved	panitumumab	missense	TCGA-75-7027-01A-11D-1945-08	LUAD
NOTCH2	p.T2159M	Sensitive	Case Reports	Gamma secretase inhibitors	NA	NA	missense	TCGA-EI-6917-01A-11D-1924-10	COADREAD
BRAF	p.V600E	Both	FDA Approved	vemurafenib, dabrafenib, trametinib, dabrafenib + trametinib	Clinical Trials	cetuximab, panitumumab	missense	TCGA-BJ-A0ZB-01A-11D-A10S-08	THCA
PIK3CA	p.E545K	Sensitive	Case Reports	mTOR inhibitors	NA	NA	missense	TCGA-CR-6487-01A-11D-1870-08	HNSC
FGFR2	p.S252W	Sensitive	Case Reports	FGFR inhibitors	NA	NA	missense	TCGA-BG-A0VV-01A-21D-A122-09	UCEC
CTNNB1	p.S37C	Sensitive	Clinical Trials	everolimus + letrozole	NA	NA	missense	TCGA-D1-A15Z-01A-11D-A122-09	UCEC
FGFR2	p.S252W	Sensitive	Case Reports	FGFR inhibitors	NA	NA	missense	TCGA-D1-A15Z-01A-11D-A122-09	UCEC
PIK3CA	p.E545K	Sensitive	Case Reports	mTOR inhibitors	NA	NA	missense	TCGA-CG-5722-01A-21D-1600-08	STAD
PIK3CA	p.H1047R	Sensitive	Clinical Trials	PI3K/AKT/mTOR inhibitors	NA	NA	missense	TCGA-BR-8487-01A-11D-2394-08	STAD
EGFR	p.L858R	Sensitive	FDA Approved	erlotinib, afatinib	NA	NA	missense	TCGA-62-8394-01A-11D-2323-08	LUAD
IDH1	p.R132H	Sensitive	Case Reports	IDH1 inhibitor	NA	NA	missense	TCGA-HT-A61A-01A-11D-A29Q-08	LGG
IDH2	p.R140Q	Sensitive	Clinical Trials	IDH2 inhibitor	NA	NA	missense	TCGA-AB-2866-03B-01W-0728-08	LAML
PIK3CA	p.E542K	Sensitive	Case Reports	mTOR inhibitors	NA	NA	missense	TCGA-EK-A2RD-01A-12D-A20U-09	CESC
NRAS	p.Q61R	Both	Clinical Trials	MEK inhibitors	FDA Approved	cetuximab, panitumumab	missense	TCGA-D9-A4Z3-01A-11D-A25O-08	SKCM
BRAF	p.V600K	Sensitive	FDA Approved	dabrafenib, RAF inhibitor	NA	NA	missense	TCGA-EB-A3XB-01A-11D-A23B-08	SKCM
PIK3CA	p.H1047R	Sensitive	Clinical Trials	PI3K/AKT/mTOR inhibitors	NA	NA	missense	TCGA-D8-A1JU-01A-11D-A13L-09	BRCA
PIK3CA	p.E545K	Sensitive	Case Reports	mTOR inhibitors	NA	NA	missense	TCGA-CM-6168-01A-11D-1650-10	COADREAD
KRAS	p.G13D	Both	Clinical Trials	cetuximab	FDA Approved	panitumumab	missense	TCGA-CM-6168-01A-11D-1650-10	COADREAD
KRAS	p.G12C	Both	Clinical Trials	MEK inhibitors	FDA Approved	panitumumab	missense	TCGA-55-8302-01A-11D-2323-08	LUAD
KRAS	p.G12D	Both	Clinical Trials	MEK inhibitors	FDA Approved	panitumumab	missense	TCGA-FU-A57G-01A-11D-A26G-09	CESC
[truncated: 366 more rows]

## Sheet: 3
Table S3. Highest level of evidence present per variant for both resistant and sensitive
Gene	Variant	Effect	Sensitive Level	Sensitive Drug	Resistant Level	Resistant Drug	Variant Type
PLK2	p.D560V	Resistant	NA	NA	Preclinical	BI2536	missense
AKT1	p.Q79K	Resistant	NA	NA	Preclinical	BRAF inhibitors	missense
AKT1	p.H238Y	Sensitive	Case Reports	everolimus	NA	NA	missense
AKT1	p.E17K	Sensitive	Clinical Trials	AKT inhibitors	NA	NA	missense
AKT1	p.D3N	Sensitive	Preclinical	AKTinhibit	NA	NA	missense
AKT2	p.A139V	Resistant	NA	NA	Preclinical	A443654	missense
AKT2	CNA	Sensitive	Preclinical	AKT inhibitors	NA	NA	CNV
AKT3	any	Sensitive	Preclinical	ATP-competitive AKT inhibitors	NA	NA	Fusion
ALK	p.V1476M	Sensitive	Preclinical	TAE684	NA	NA	Fusion
ALK	p.S1206Y	Both	FDA Approved	ceritinib	Preclinical	crizotinib	Fusion
ALK	p.R1275Q	Sensitive	Preclinical	crizotinib	NA	NA	Fusion
ALK	p.R1192P	Sensitive	Preclinical	crizotinib	NA	NA	Fusion
ALK	p.P379S	Resistant	NA	NA	Preclinical	PF2341066	Fusion
ALK	p.P157H	Resistant	NA	NA	Preclinical	PF2341066	Fusion
ALK	p.P1543S	Sensitive	Preclinical	TAE684	NA	NA	Fusion
ALK	p.P1218S	Resistant	NA	NA	Preclinical	PF2341066	Fusion
ALK	p.L1196M	Both	FDA Approved	ceritinib	Preclinical	crizotinib	Fusion
ALK	p.L1152R	Resistant	NA	NA	Preclinical	crizotinib	Fusion
ALK	p.I1171T	Both	FDA Approved	ceritinib	Preclinical	crizotinib, alectinib	Fusion
ALK	p.I1171N	Sensitive	Preclinical	crizotinib	NA	NA	Fusion
ALK	p.G1269A	Both	FDA Approved	ceritinib	Preclinical	crizotinib	Fusion
ALK	p.G1202R	Resistant	NA	NA	Preclinical	crizotinib	Fusion
ALK	p.G1128A	Sensitive	Preclinical	crizotinib	NA	NA	Fusion
ALK	p.F856S	Sensitive	Preclinical	crizotinib	NA	NA	Fusion
ALK	p.F1245C	Sensitive	Preclinical	crizotinib	NA	NA	Fusion
ALK	p.F1174V	Sensitive	Case Reports	Crizotinib	NA	NA	Fusion
ALK	p.F1174L	Both	Preclinical	novel ALK inhibiors	Preclinical	crizotinib	Fusion
ALK	p.F1174C	Resistant	NA	NA	Preclinical	Crizotinib, Ceritinib	Fusion
ALK	p.C928Y	Resistant	NA	NA	Preclinical	PF2341066	Fusion
ALK	p.C1156Y	Resistant	NA	NA	Preclinical	crizotinib	Fusion
ALK	p.A348D	Sensitive	Preclinical	crizotinib	NA	NA	Fusion
ALK	p.1151in_frame_insT	Both	FDA Approved	ceritinib	Preclinical	crizotinib	Fusion
ALK	CNA	Resistant	NA	NA	Preclinical	crizotinib	CNV
ALK	any	Sensitive	FDA Approved	crizotinib, ceritinib	NA	NA	Fusion
AR	p.T877A	Both	Preclinical	enzalutamide, ARN-509	Preclinical	flutamide	missense
AR	p.S244L	Resistant	NA	NA	Preclinical	PARP1Bical	missense
AR	p.F876L	Resistant	NA	NA	Preclinical	enzalutamide, ARN-509	missense
AR	p.A52T	Sensitive	Preclinical	PARP1Bical	NA	NA	missense
AR	Expression	Sensitive	FDA Approved	androgen receptor modulators and antagonists	NA	NA	Expression
AR	741	Both	Preclinical	enzalutamide, ARN-509	Preclinical	bicalutamide	missense
ARAF	p.S214C	Sensitive	Case Reports	sorafenib	NA	NA	missense
ATIC-ALK	any	Sensitive	FDA Approved	Crizotinib, Ceritinib	NA	NA	Fusion
ATM	Underexpression	Sensitive	Clinical Trials	PARP inhibitors	NA	NA	Expression
ATM	p.Q2762R	Sensitive	Preclinical	KU55933	NA	NA	missense
ATM	CNL	Sensitive	Preclinical	DNA-PKc inhibitors	NA	NA	CNV
AURKA	Expression	Sensitive	Preclinical	AURK inhibitors	NA	NA	Expression
BCL2	CNA	Sensitive	Preclinical	BCL2 inhibitors	NA	NA	CNV
BCR-ABL1	p.Y253H	Sensitive	FDA Approved	dasatinib, ponatinib	NA	NA	Fusion
BCR-ABL1	p.V587M	Resistant	NA	NA	Preclinical	Dasatinib	Fusion
BCR-ABL1	p.V299L	Sensitive	FDA Approved	nilotinib, ponatinib	NA	NA	Fusion
BCR-ABL1	p.T315I	Both	FDA Approved	ponatinib	Clinical Trials	imatinib	Fusion
BCR-ABL1	p.T315A	Sensitive	FDA Approved	nilotinib, ponatinib	NA	NA	Fusion
BCR-ABL1	p.I1146T	Resistant	NA	NA	Preclinical	AZD0530	Fusion
BCR-ABL1	p.G1079D	Sensitive	Preclinical	Nilotinib	NA	NA	Fusion
BCR-ABL1	p.F35I	Sensitive	FDA Approved	dasatinib, ponatinib	NA	NA	Fusion
BCR-ABL1	p.F35C	Sensitive	FDA Approved	dasatinib, ponatinib	NA	NA	Fusion
BCR-ABL1	p.F359V	Sensitive	FDA Approved	dasatinib, ponatinib	NA	NA	Fusion
BCR-ABL1	p.F31V	Sensitive	FDA Approved	nilotinib, ponatinib	NA	NA	Fusion
BCR-ABL1	p.F31I	Sensitive	FDA Approved	nilotinib, ponatinib	NA	NA	Fusion
BCR-ABL1	p.F31C	Sensitive	FDA Approved	nilotinib, ponatinib	NA	NA	Fusion
BCR-ABL1	p.F317L	Sensitive	FDA Approved	nilotinib, ponatinib	NA	NA	Fusion
BCR-ABL1	p.E810G	Sensitive	Preclinical	Nilotinib	NA	NA	Fusion
BCR-ABL1	p.E25V	Sensitive	FDA Approved	dasatinib, ponatinib	NA	NA	Fusion
BCR-ABL1	p.E255K	Sensitive	FDA Approved	dasatinib, ponatinib	NA	NA	Fusion
BCR-ABL1	any	Both	FDA Approved	nilotinib	Clinical Trials	imatinib	Fusion
BCR-JAK2	any	Sensitive	Preclinical	ruxolitinib	NA	NA	Fusion
BCR-PDGFRA	any	Sensitive	Case Reports	Imatinib, TKIs	NA	NA	Fusion
BCR-RET	any	Sensitive	Case Reports	sorafenib	NA	NA	Fusion
BRAF	p.Y472C	Sensitive	Case Reports	dasatinib	NA	NA	missense
BRAF	p.V600R	Sensitive	Clinical Trials	BRAF inhibitors	NA	NA	missense
BRAF	p.V600K	Sensitive	FDA Approved	trametinib, dabrafenib + trametinib	NA	NA	missense
BRAF	p.V600E	Both	FDA Approved	vemurafenib, dabrafenib, trametinib, dabrafenib + trametinib	Clinical Trials	cetuximab, panitumumab	missense
BRAF	p.P74A	Resistant	NA	NA	Preclinical	PLX4720	missense
BRAF	p.N581Y	Resistant	NA	NA	Preclinical	PLX4720	missense
BRAF	p.L597V	Sensitive	Case Reports	trametinib, MEK inhibitor	NA	NA	missense
BRAF	p.L597R	Both	Case Reports	BRAF inhibitors	Preclinical	PLX4720	missense
BRAF	p.K601R	Sensitive	Case Reports	MEK inhibitors	NA	NA	missense
BRAF	p.G469E	Sensitive	Preclinical	sorafenib	NA	NA	missense
BRAF	p.G469A	Both	Preclinical	EGFR TKIs + MEK inhibitors in EGFR mutant	Preclinical	EGFR TKIs	missense
BRAF	p.G466V	Sensitive	Preclinical	dasatinib	NA	NA	missense
BRAF	p.G464V	Resistant	NA	NA	Preclinical	PLX4720	missense
BRAF	p.E375D	Resistant	NA	NA	Preclinical	PLX4720	missense
BRAF	p.E204L	Resistant	NA	NA	Preclinical	PLX4720	missense
BRAF	p.D594G	Sensitive	Preclinical	sorafenib	NA	NA	missense
BRAF	p.A712T	Resistant	NA	NA	Preclinical	PLX4720	missense
BRAF	any	Sensitive	Clinical Trials	MEK inhibitors	NA	NA	Fusion
BRAF	600	Sensitive	FDA Approved	dabrafenib, RAF inhibitor	NA	NA	missense
BRAF	597	Sensitive	Case Reports	trametinib, MEK inhibitors	NA	NA	missense
BRCA1	V1688del	Sensitive	FDA Approved	PARP inhibitors	NA	NA	in_frame_del
BRCA1	T1685I	Sensitive	FDA Approved	PARP inhibitors	NA	NA	missense
BRCA1	T1685A	Sensitive	FDA Approved	PARP inhibitors	NA	NA	missense
BRCA1	S1715R	Sensitive	FDA Approved	PARP inhibitors	NA	NA	missense
BRCA1	R1699W	Sensitive	FDA Approved	PARP inhibitors	NA	NA	missense
BRCA1	R1495M	Sensitive	FDA Approved	PARP inhibitors	NA	NA	missense
BRCA1	M18T	Sensitive	FDA Approved	PARP inhibitors	NA	NA	missense
BRCA1	M1689R	Sensitive	FDA Approved	PARP inhibitors	NA	NA	missense
BRCA1	L1764P	Sensitive	FDA Approved	PARP inhibitors	NA	NA	missense
BRCA1	I1766S	Sensitive	FDA Approved	PARP inhibitors	NA	NA	missense
BRCA1	G1788V	Sensitive	FDA Approved	PARP inhibitors	NA	NA	missense
BRCA1	G1738R	Sensitive	FDA Approved	PARP inhibitors	NA	NA	missense
BRCA1	G1706E	Sensitive	FDA Approved	PARP inhibitors	NA	NA	missense
BRCA1	CNL	Sensitive	FDA Approved	PARP inhibitors	NA	NA	CNV
BRCA1	any nonsense mutation	Sensitive	FDA Approved	PARP inhibitors	NA	NA	nonsense
BRCA1	any frameshift mutation	Sensitive	FDA Approved	PARP inhibitors	NA	NA	frame_shift
BRCA1	A1708E	Sensitive	FDA Approved	PARP inhibitors	NA	NA	missense
BRCA1	A1623G	Sensitive	FDA Approved	PARP inhibitors	NA	NA	missense
BRCA2	W2626C	Sensitive	FDA Approved	PARP inhibitors	NA	NA	missense
BRCA2	T2722R	Sensitive	FDA Approved	PARP inhibitors	NA	NA	missense
BRCA2	R2659K	Sensitive	FDA Approved	PARP inhibitors	NA	NA	missense
BRCA2	R2502C	Sensitive	FDA Approved	PARP inhibitors	NA	NA	missense
BRCA2	R2336H	Sensitive	FDA Approved	PARP inhibitors	NA	NA	missense
BRCA2	L2653P	Sensitive	FDA Approved	PARP inhibitors	NA	NA	missense
BRCA2	I2627F	Sensitive	FDA Approved	PARP inhibitors	NA	NA	missense
BRCA2	G2748D	Sensitive	FDA Approved	PARP inhibitors	NA	NA	missense
BRCA2	E2663V	Sensitive	FDA Approved	PARP inhibitors	NA	NA	missense
BRCA2	D3095E	Sensitive	FDA Approved	PARP inhibitors	NA	NA	missense
BRCA2	CNL	Sensitive	FDA Approved	PARP inhibitors	NA	NA	CNV
BRCA2	any nonsense mutation	Sensitive	FDA Approved	PARP inhibitors	NA	NA	nonsense
BRCA2	any frameshift mutation	Sensitive	FDA Approved	PARP inhibitors	NA	NA	frame_shift
BRD4	any	Sensitive	Preclinical	BET inhibitors	NA	NA	Fusion
BTK	p.C481S	Resistant	NA	NA	Clinical Trials	ibrutinib	missense
BTK	481	Resistant	NA	NA	Preclinical	ibrutinib	missense
CBL	p.Y371H	Sensitive	Preclinical	JAK inhibitors, dasatinib	NA	NA	missense
CBL	p.C384R	Sensitive	Preclinical	JAK inhibitors, dasatinib	NA	NA	missense
CCND1	CNA	Sensitive	Case Reports	CDK4/6 inhibitors	NA	NA	CNV
CCND2	CNA	Sensitive	Preclinical	CDK4/6 inhibitors	NA	NA	CNV
CCND3	CNA	Sensitive	Preclinical	CDK4/6 inhibitors	NA	NA	CNV
CCNE1	CNA	Sensitive	Preclinical	CDK2 inhibitors	NA	NA	CNV
CD274	Expression	Sensitive	FDA Approved	PD-L1 inhibitor	NA	NA	Expression
CD274	CNA	Sensitive	Preclinical	PDL1 inhibitors	NA	NA	CNV
CD30	Expression	Sensitive	FDA Approved	Brentuximab Vedotin	NA	NA	Expression
CD74-ROS1	any	Sensitive	Preclinical	crizotinib	NA	NA	Fusion
CDK4	p.R24C	Sensitive	Preclinical	flavopiridol	NA	NA	missense
CDK4	CNA	Sensitive	Clinical Trials	CDK4 inhibitors (tumors with RB expression)	NA	NA	CNV
CDK5RAP2-PDGFRA	any	Sensitive	Case Reports	Imatinib, TKIs	NA	NA	Fusion
CDK6	CNA	Sensitive	Preclinical	CDK6 inhibitors	NA	NA	CNV
CDKN2A	CNL	Sensitive	Case Reports	Palbociclib, CDK4/6 inhibitor	NA	NA	CNV
CDKN2B	CNL	Sensitive	Preclinical	CDK4/6 inhibitors	NA	NA	CNV
CDKN2C	CNL	Sensitive	Preclinical	CDK4/6 inhibitors	NA	NA	CNV
CLTC-ALK	any	Sensitive	Preclinical	Crizotinib	NA	NA	Fusion
COL1A1-PDGFRB	any	Sensitive	FDA Approved	imatinib	NA	NA	Fusion
CRKL	Expression	Resistant	NA	NA	Preclinical	EGFR TKIs	Expression
CRLF2	any	Sensitive	Preclinical	mTOR inhibitors	NA	NA	Fusion
CSF1R	p.Y571D	Sensitive	Preclinical	imatinib	NA	NA	missense
CSF3R	p.Y752X	Sensitive	Preclinical	dasatinib	NA	NA	missense
CSF3R	p.W791X	Sensitive	Preclinical	dasatinib	NA	NA	missense
CSF3R	p.T618I	Sensitive	Case Reports	ruxolitinib	NA	NA	missense
CSF3R	p.T615A	Sensitive	Preclinical	ruxolitinib	NA	NA	missense
CSF3R	p.S783fs	Sensitive	Preclinical	dasatinib	NA	NA	frame_shift_del_unspecified
CSF3R	p.Q741X	Sensitive	Preclinical	dasatinib	NA	NA	missense
CSF3R	p.D771fs	Sensitive	Preclinical	dasatinib	NA	NA	frame_shift_del_unspecified
CTNNB1	p.S37Y	Sensitive	Clinical Trials	everolimus + letrozole	NA	NA	missense
CTNNB1	p.S37C	Sensitive	Clinical Trials	everolimus + letrozole	NA	NA	missense
CTNNB1	p.R582Q	Resistant	NA	NA	Preclinical	FH535	missense
CTNNB1	p.H36Y	Sensitive	Clinical Trials	everolimus + letrozole	NA	NA	missense
CTNNB1	p.D32V	Sensitive	Clinical Trials	everolimus + letrozole	NA	NA	missense
DDR2	p.S768R	Sensitive	Case Reports	dasatinib + erlotinib	NA	NA	missense
DDR2	p.L63V	Sensitive	Preclinical	dasatinib	NA	NA	missense
DDR2	p.L239R	Sensitive	Preclinical	dasatinib	NA	NA	missense
DDR2	p.I638F	Sensitive	Preclinical	dasatinib	NA	NA	missense
DDR2	p.G774V	Sensitive	Preclinical	dasatinib	NA	NA	missense
DDR2	p.G505S	Sensitive	Preclinical	dasatinib	NA	NA	missense
DDR2	p.G253C	Sensitive	Preclinical	dasatinib	NA	NA	missense
DLL3	Expression	Sensitive	Preclinical	DLL3 antibody-drug conjugate	NA	NA	Expression
EGFR	p.Y1069C	Sensitive	Preclinical	Lapatinib	NA	NA	missense
EGFR	p.W1157C	Resistant	NA	NA	Preclinical	Lapatinib	missense
EGFR	p.V843I	Resistant	NA	NA	Preclinical	gefitinib	missense
EGFR	p.V1011M	Sensitive	Preclinical	Gefitinib	NA	NA	missense
EGFR	p.T790M	Both	FDA Approved	AZD9291	FDA Approved	erlotinib, afatinib	missense
EGFR	p.T751I	Resistant	NA	NA	Preclinical	Lapatinib	missense
EGFR	p.T263P	Sensitive	Preclinical	erlotinib	NA	NA	missense
EGFR	p.S768I	Sensitive	FDA Approved	erlotinib, afatinib	NA	NA	missense
EGFR	p.S492R	Both	Clinical Trials	novel anti-EGFR mAbs	Preclinical	cetuximab	missense
EGFR	p.S464L	Resistant	NA	NA	Preclinical	cetuximab	missense
EGFR	p.R98Q	Resistant	NA	NA	Preclinical	Lapatinib	missense
EGFR	p.R973Q	Sensitive	Preclinical	TKI258	NA	NA	missense
EGFR	p.R451C	Resistant	NA	NA	Preclinical	cetuximab	missense
EGFR	p.R108K	Sensitive	Preclinical	erlotinib	NA	NA	missense
EGFR	p.P753S	Sensitive	Case Reports	cetuximab + sirolimus	NA	NA	missense
EGFR	p.P546S	Sensitive	Case Reports	cetuximab	NA	NA	missense
EGFR	p.L861R	Sensitive	FDA Approved	erlotinib, afatinib	NA	NA	missense
EGFR	p.L861Q	Sensitive	FDA Approved	erlotinib, afatinib	NA	NA	missense
EGFR	p.L861P	Sensitive	FDA Approved	erlotinib, afatinib	NA	NA	missense
EGFR	p.L858R	Sensitive	FDA Approved	erlotinib, afatinib	NA	NA	missense
EGFR	p.L747S	Sensitive	FDA Approved	erlotinib, afatinib	NA	NA	missense
EGFR	p.K467T	Both	Preclinical	panitumumab	Preclinical	cetuximab	missense
EGFR	p.K209N	Sensitive	Preclinical	Lapatinib	NA	NA	missense
EGFR	p.I491M	Resistant	NA	NA	Preclinical	cetuximab	missense
EGFR	p.G719S	Sensitive	FDA Approved	erlotinib, afatinib	NA	NA	missense
EGFR	p.G719D	Sensitive	FDA Approved	erlotinib, afatinib	NA	NA	missense
EGFR	p.G719C	Sensitive	FDA Approved	erlotinib, afatinib	NA	NA	missense
EGFR	p.G719A	Sensitive	FDA Approved	erlotinib, afatinib	NA	NA	missense
EGFR	p.G598V	Sensitive	Preclinical	erlotinib	NA	NA	missense
EGFR	p.G465R	Resistant	NA	NA	Preclinical	cetuximab	missense
EGFR	p.ELREA746in_frame_del	Sensitive	Preclinical	ZD6474	NA	NA	in_frame_del
EGFR	p.ELR746in_frame_del	Sensitive	Preclinical	ZD6474	NA	NA	in_frame_del
EGFR	p.E690K	Sensitive	Case Reports	lapatinib	NA	NA	missense
EGFR	p.C797S	Resistant	NA	NA	Clinical Trials	irreversible EGFR T790M inhibitors	missense
EGFR	p.A289V	Sensitive	Preclinical	erlotinib	NA	NA	missense
EGFR	Expression	Resistant	NA	NA	Clinical Trials	EGFR TKIs	Expression
EGFR	exon p.763-764	Sensitive	Case Reports	erlotinib	NA	NA	in_frame_ins
EGFR	exon p.762-823	Both	Clinical Trials	HSP90 inhibitors	Clinical Trials	first-generation and irreversible EGFR TKIs	in_frame_ins
EGFR	exon p.762-775	Resistant	NA	NA	Preclinical	Erlotinib, gefitinib	in_frame_ins
EGFR	exon p.750-756	Sensitive	FDA Approved	Afatinib	NA	NA	in_frame_del
EGFR	exon p.729-761	Sensitive	FDA Approved	erlotinib, afatinib	NA	NA	in_frame_del
EGFR	exon p.30-336	Resistant	NA	NA	Clinical Trials	EGFR TKIs	in_frame_del
EGFR	exon c.2284-2469	Resistant	NA	NA	FDA Approved	gefitinib	in_frame_ins
EGFR	exon c.2186-2283	Sensitive	FDA Approved	gefitinib	NA	NA	in_frame_ins
EGFR	CNA	Both	Clinical Trials	anti-EGFR mAbs	Clinical Trials	erlotinib	CNV
EGFR	any	Sensitive	Case Reports	erlotinib	NA	NA	Fusion
EGFR	719	Sensitive	Clinical Trials	afatinib	NA	NA	missense
EML1-ABL1	any	Sensitive	Case Reports	imatinib	NA	NA	Fusion
EML4-ALK	any	Sensitive	FDA Approved	Crizotinib, Ceritinib	NA	NA	Fusion
EPHA2	p.G391R	Sensitive	Preclinical	mTOR inhibitors, dasatinib	NA	NA	missense
EPHA2	Expression	Sensitive	Preclinical	dasatinib	NA	NA	Expression
EPHA3	Expression	Sensitive	Preclinical	EPHA3 inhibitors	NA	NA	Expression
ERBB2	p.V842I	Sensitive	Preclinical	lapatinib, neratinib	NA	NA	missense
ERBB2	p.V777L	Sensitive	Preclinical	lapatinib, neratinib	NA	NA	missense
ERBB2	p.V659E	Sensitive	Case Reports	lapatinib	NA	NA	missense
ERBB2	p.S310Y	Sensitive	Preclinical	ERBB2 TKIs, trastuzumab	NA	NA	missense
ERBB2	p.S310F	Sensitive	Preclinical	ERBB2 TKIs, trastuzumab	NA	NA	missense
ERBB2	p.R896C	Sensitive	Preclinical	trastuzumab, lapatinib, neratinib	NA	NA	missense
ERBB2	p.L755S	Sensitive	Preclinical	neratinib	NA	NA	missense
ERBB2	p.L720P	Sensitive	Preclinical	Lapatinib	NA	NA	missense
ERBB2	p.G776L	Sensitive	Case Reports	trastuzumab-based therapy	NA	NA	missense
ERBB2	p.G309E	Sensitive	Preclinical	ERBB2 TKIs, trastuzumab	NA	NA	missense
ERBB2	p.G309A	Sensitive	Preclinical	lapatinib, neratinib	NA	NA	missense
ERBB2	p.E321G	Sensitive	Preclinical	ERBB2 TKIs	NA	NA	missense
ERBB2	p.D769Y	Sensitive	Preclinical	trastuzumab, lapatinib, neratinib	NA	NA	missense
ERBB2	p.D769H	Sensitive	Preclinical	trastuzumab, lapatinib, neratinib	NA	NA	missense
ERBB2	p.C334S	Sensitive	Preclinical	ERBB2 TKIs	NA	NA	missense
ERBB2	p.C311R	Sensitive	Preclinical	ERBB2 TKIs, trastuzumab	NA	NA	missense
ERBB2	p.A859T	Sensitive	Case Reports	Trastuzumab	NA	NA	missense
ERBB2	Expression	Sensitive	FDA Approved	trastuzumab	NA	NA	Expression
ERBB2	exon p.775-881	Sensitive	Clinical Trials	trastuzumab-based therapy	NA	NA	in_frame_ins
ERBB2	exon c.2308-2493	Sensitive	Clinical Trials	trastuzumab	NA	NA	in_frame_ins
ERBB2	CNA	Both	FDA Approved	trastuzumab, lapatinib, pertuzumab, ado-trastuzumab emtansine	Clinical Trials	anti-EGFR mAbs	CNV
ERBB3	p.R103G	Sensitive	Case Reports	afatinib	NA	NA	missense
ERBB3	p.Q809R	Sensitive	Preclinical	trastuzumab, lapatinib, PI3K pathway inhibitors + MEK inhibitors	NA	NA	missense
ERBB3	p.P262H	Sensitive	Preclinical	trastuzumab, pertuzumab, lapatinib, anti-HER3 mAbs, PI3K pathway inhibitors + MEK inhibitors	NA	NA	missense
ERBB3	p.G284R	Sensitive	Case Reports	afatinib	NA	NA	missense
ERBB4	p.R544W	Sensitive	Preclinical	lapatinib	NA	NA	missense
ERBB4	p.R393W	Sensitive	Preclinical	lapatinib	NA	NA	missense
ERBB4	p.E872K	Sensitive	Preclinical	lapatinib	NA	NA	missense
ERBB4	p.E542K	Sensitive	Preclinical	lapatinib	NA	NA	missense
ERBB4	p.E452K	Sensitive	Preclinical	lapatinib	NA	NA	missense
ERBB4	p.E317K	Sensitive	Preclinical	lapatinib	NA	NA	missense
ERBB4	any	Sensitive	Preclinical	lapatinib, afatinib	NA	NA	Fusion
ERCC1	Underexpression	Sensitive	Preclinical	cisplatin	NA	NA	Expression
ESR1	p.P535H	Resistant	NA	NA	Clinical Trials	anti-estrogens	missense
ESR1	p.E380Q	Resistant	NA	NA	Clinical Trials	anti-estrogens	missense
ESR1	Expression	Sensitive	FDA Approved	aromatase inhibitors	NA	NA	Expression
ESR1	any	Resistant	NA	NA	Preclinical	anti-estrogens	Fusion
ESR1	538	Both	Clinical Trials	novel estrogen receptor degrader	Clinical Trials	anti-estrogens	missense
ESR1	537	Both	Clinical Trials	novel estrogen receptor degrader	Clinical Trials	anti-estrogens	missense
ESR1	536	Resistant	NA	NA	Clinical Trials	anti-estrogens	missense
ETS	any	Sensitive	Preclinical	PARP inhibitors	NA	NA	Fusion
ETV6-ABL1	any	Both	Case Reports	nilotinib	Preclinical	imatinib	Fusion
EWS	any	Sensitive	Preclinical	PARP inhibitors	NA	NA	Fusion
EZH2	p.Y646F	Sensitive	Preclinical	EZH2 inhibitor	NA	NA	missense
EZH2	677	Sensitive	Preclinical	EZH2 inhibitor	NA	NA	missense
EZH2	641	Sensitive	Preclinical	EZH2 inhibitor	NA	NA	missense
FBXW7	Underexpression	Resistant	NA	NA	Preclinical	anti-tubulin agents	Expression
FGF3	CNA	Sensitive	Clinical Trials	dovitinib	NA	NA	CNV
FGF4	CNA	Sensitive	Clinical Trials	dovitinib	NA	NA	CNV
FGFR1	p.T79A	Sensitive	Preclinical	TKI258	NA	NA	missense
FGFR1	CNA	Sensitive	Clinical Trials	FGFR inhibitors	NA	NA	CNV
FGFR2	p.W290C	Sensitive	Preclinical	FGFR inhibitors	NA	NA	missense
FGFR2	p.V565I	Both	Preclinical	selective FGFR inhibitor	Preclinical	ponatinib	missense
FGFR2	p.S320C	Sensitive	Preclinical	FGFR inhibitors	NA	NA	missense
FGFR2	p.S252W	Sensitive	Preclinical	FGFR inhibitors	NA	NA	missense
FGFR2	p.P253R	Sensitive	Case Reports	pazopanib	NA	NA	missense
FGFR2	p.N550S	Resistant	NA	NA	Preclinical	Dovitinib	missense
FGFR2	p.N550K	Resistant	NA	NA	Preclinical	Dovitinib	missense
FGFR2	p.N550H	Resistant	NA	NA	Preclinical	Dovitinib	missense
FGFR2	p.N549K	Sensitive	Preclinical	FGFR inhibitors	NA	NA	missense
FGFR2	p.M538I	Both	Preclinical	ponatinib	Preclinical	dovitinib	missense
FGFR2	p.M536I	Both	Preclinical	ponatinib	Preclinical	dovitinib	missense
FGFR2	p.L618M	Both	Preclinical	ponatinib	Preclinical	dovitinib	missense
FGFR2	p.K660N	Sensitive	Preclinical	FGFR inhibitors	NA	NA	missense
FGFR2	p.K660E	Both	Preclinical	ponatinib	Preclinical	dovitinib	missense
FGFR2	p.I548V	Both	Preclinical	ponatinib	Preclinical	dovitinib	missense
FGFR2	p.E566G	Both	Preclinical	ponatinib	Preclinical	dovitinib	missense
FGFR2	CNA	Sensitive	Clinical Trials	FGFR inhibitors	NA	NA	CNV
FGFR2	any	Sensitive	Preclinical	FGFR inhibitors	NA	NA	Fusion
FGFR2	550	Both	Preclinical	ponatinib	Preclinical	dovitinib	missense
FGFR3	p.Y373C	Both	Preclinical	FGFR inhibitors	Preclinical	bortezomib	missense
FGFR3	p.V555M	Resistant	NA	NA	Preclinical	FGFR inhibitors	missense
FGFR3	p.S773F	Sensitive	Preclinical	PD173074	NA	NA	missense
FGFR3	any	Sensitive	Clinical Trials	FGFR inhibitors	NA	NA	Fusion
FGFR3	650	Sensitive	Preclinical	FGFR inhibitors	NA	NA	missense
FGFR4	550	Sensitive	Preclinical	FGFR inhibitors	NA	NA	missense
FGFR4	535	Sensitive	Preclinical	FGFR inhibitors	NA	NA	missense
FIP1L1-PDGFRA	any	Sensitive	FDA Approved	Imatinib, TKIs	NA	NA	Fusion
FLT1	p.S1277N	Sensitive	Preclinical	TKI258	NA	NA	missense
FLT3	p.V592A	Sensitive	Preclinical	Sorafenib	NA	NA	missense
FLT3	p.R311W	Sensitive	Preclinical	Sorafenib	NA	NA	missense
FLT3	p.Q910*	Resistant	NA	NA	Preclinical	CEP701	nonsense
FLT3	p.P937H	Sensitive	Preclinical	Sorafenib	NA	NA	missense
FLT3	842	Both	Preclinical	crenolanib, PKC412	Preclinical	ponatinib	missense
FLT3	835	Both	Case Reports	lestaurtinib	Preclinical	sorafenib	missense
FLT3	691	Both	Preclinical	novel FLT3 inhibitors	Preclinical	quizartinib	missense
FLT3	676	Both	Preclinical	crenolanib, PKC412	Preclinical	quizartinib	missense
FRS2	CNA	Sensitive	Preclinical	FGFR inhibitors	NA	NA	CNV
GNA11	p.Q209P	Sensitive	Clinical Trials	selumetinib	NA	NA	missense
GNA11	p.Q209L	Sensitive	Clinical Trials	selumetinib	NA	NA	missense
GNAQ	209	Sensitive	Clinical Trials	selumetinib	NA	NA	missense
GNAS	201	Sensitive	Preclinical	JAK inhibitors	NA	NA	missense
HDAC2	p.P5S	Resistant	NA	NA	Preclinical	MS275	missense
HDAC3	p.P23R	Resistant	NA	NA	Preclinical	Vorinostat	missense
HDAC8	p.R223fs	Resistant	NA	NA	Preclinical	Vorinostat	frame_shift_del_unspecified
HGF	CNA	Resistant	NA	NA	Clinical Trials	trastuzumab in HER2-ampl	CNV
HRAS	12	Sensitive	Preclinical	mTOR inhibitors	NA	NA	missense
HSP90AA1	p.R467Q	Resistant	NA	NA	Preclinical	AUY922	missense
HSP90AB1	p.V575A	Resistant	NA	NA	Preclinical	17AAG	missense
HSP90AB4P	p.I354in_frame_del	Resistant	NA	NA	Preclinical	17AAG	in_frame_del
HSP90B1	p.E791in_frame_del	Resistant	NA	NA	Preclinical	17AAG	in_frame_del
HSP90B1	p.E758Q	Resistant	NA	NA	Preclinical	17AAG	missense
HSP90B3P	p.K348fs	Resistant	NA	NA	Preclinical	AUY922	frame_shift_del_unspecified
IDH1	p.R132H	Sensitive	Preclinical	IDH1 inhibitor	NA	NA	missense
IDH2	p.R172K	Sensitive	Clinical Trials	IDH2 inhibitor	NA	NA	missense
IDH2	p.R140Q	Sensitive	Clinical Trials	IDH2 inhibitor	NA	NA	missense
IGF1R	p.L360F	Sensitive	Preclinical	OSI906	NA	NA	missense
IGF1R	p.D1146N	Sensitive	Preclinical	AEW541	NA	NA	missense
IGF1R	p.A828T	Sensitive	Preclinical	AEW541	NA	NA	missense
IGF1R	Expression	Resistant	NA	NA	Preclinical	erlotinib	Expression
IL2RA	Expression	Sensitive	FDA Approved	denileukin diftitox	NA	NA	Expression
INI1	CNL	Sensitive	Case Reports	EZH2 inhibitor	NA	NA	CNV
JAK1	p.S646F	Sensitive	Preclinical	ruxolitinib	NA	NA	missense
JAK2	p.V617F	Sensitive	FDA Approved	ruxolitinib	NA	NA	missense
JAK2	any	Sensitive	Preclinical	ruxolitinib	NA	NA	Fusion
JAK2	683	Sensitive	Preclinical	ruxolitinib	NA	NA	missense
JAK3	p.R657Q	Sensitive	Preclinical	JAK inhibitors	NA	NA	missense
JAK3	p.Q501H	Sensitive	Preclinical	JAK inhibitors	NA	NA	missense
JAK3	p.I87T	Sensitive	Preclinical	JAK inhibitors	NA	NA	missense
JAK3	p.A573V	Sensitive	Preclinical	JAK inhibitors	NA	NA	missense
JAK3	p.A572V	Sensitive	Preclinical	JAK inhibitors	NA	NA	missense
KDR	p.R791Q	Sensitive	Preclinical	TKI258	NA	NA	missense
KDR	p.Q2R	Resistant	NA	NA	Preclinical	Sorafenib	missense
KDR	p.I915T	Resistant	NA	NA	Preclinical	Sorafenib	missense
KDR	p.H1213Q	Resistant	NA	NA	Preclinical	Sorafenib	missense
KDR	p.G424D	Resistant	NA	NA	Preclinical	Sorafenib	missense
KDR	p.G255R	Sensitive	Preclinical	TKI258	NA	NA	missense
KDR	p.G1145R	Sensitive	Preclinical	Sorafenib	NA	NA	missense
KDR	p.E685G	Sensitive	Preclinical	TKI258	NA	NA	missense
KDR	p.D392N	Resistant	NA	NA	Preclinical	Sorafenib	missense
KDR	p.A1065T	Sensitive	Preclinical	VEGFR inhibitors	NA	NA	missense
KIF5B-RET	any	Sensitive	Case Reports	cabozantinib	NA	NA	Fusion
KIT	Wild Type	Both	Clinical Trials	sunitinib	Clinical Trials	imatinib	Wild Type
KIT	p.Y823D	Resistant	NA	NA	Preclinical	imatinib	missense
KIT	p.Y553N	Sensitive	Case Reports	imatinib (KIT inhibitor)	NA	NA	missense
KIT	p.W557R	Sensitive	Case Reports	KIT inhibitors	NA	NA	missense
KIT	p.V654A	Both	Preclinical	ponatinib	Preclinical	imatinib	missense
KIT	p.V560in_frame_del	Sensitive	Case Reports	sunitinib (KIT inhibitor)	NA	NA	in_frame_del
KIT	p.V559I	Resistant	NA	NA	Preclinical	imatinib	missense
KIT	p.V559A	Sensitive	Case Reports	KIT inhibitors	NA	NA	missense
KIT	p.T670I	Both	Preclinical	ponatinib	Preclinical	imatinib	missense
KIT	p.N822K	Both	Preclinical	dasatinib	Preclinical	Sorafenib	missense
KIT	p.N655K	Sensitive	Case Reports	Imatinib, TKIs	NA	NA	missense
KIT	p.M882V	Resistant	NA	NA	Preclinical	Sorafenib	missense
KIT	p.L576P	Sensitive	Case Reports	KIT inhibitors	NA	NA	missense
KIT	p.L160W	Resistant	NA	NA	Preclinical	Sorafenib	missense
KIT	p.K642E	Sensitive	Clinical Trials	Imatinib, TKIs	NA	NA	missense
KIT	p.K509I	Sensitive	Case Reports	Imatinib, TKIs	NA	NA	missense
KIT	p.H697Y	Sensitive	Preclinical	sunitinib	NA	NA	missense
KIT	p.H687Y	Resistant	NA	NA	Preclinical	imatinib	missense
KIT	p.D820Y	Sensitive	Case Reports	nilotinib	NA	NA	missense
KIT	p.D820E	Sensitive	Case Reports	sorafenib	NA	NA	missense
KIT	p.D816V	Sensitive	Case Reports	dasatinib	NA	NA	missense
KIT	p.D52N	Sensitive	Case Reports	SCF	NA	NA	missense
KIT	p.D419in_frame_del	Sensitive	Case Reports	Imatinib, TKIs	NA	NA	in_frame_del
KIT	p.A829P	Both	Preclinical	ponatinib	Preclinical	imatinib	missense
KIT	p.502in_frame_insSA	Sensitive	Clinical Trials	sunitinib	NA	NA	in_frame_ins
KIT	Expression	Sensitive	FDA Approved	imatinib	NA	NA	Expression
KIT	exon p.829-860	Both	Clinical Trials	ponatinib	Clinical Trials	imatinib	missense
KIT	exon p.788-828	Both	Case Reports	sorafenib	Clinical Trials	imatinib	missense
KIT	exon p.664-714	Sensitive	Clinical Trials	sunitinib	NA	NA	missense
KIT	exon p.627-664	Sensitive	FDA Approved	imatinib	NA	NA	missense
KIT	exon p.627-663	Sensitive	Case Reports	sunitinib	NA	NA	missense
KIT	exon p.550-592	Sensitive	FDA Approved	imatinib, sunitinib, regorafenib	NA	NA	missense
KIT	exon p.550-591	Sensitive	FDA Approved	imatinib	NA	NA	in_frame_del
KIT	exon p.550-591	Sensitive	FDA Approved	imatinib	NA	NA	missense
KIT	exon p.450-513	Sensitive	Clinical Trials	sunitinib	NA	NA	missense
KIT	exon p.449-514	Both	FDA Approved	imatinib, sunitinib, regorafenib	Clinical Trials	imatinib (low dose)	missense
KIT	CNA	Both	Clinical Trials	sunitinib	Clinical Trials	imatinib	CNV
KIT	822	Resistant	NA	NA	Preclinical	imatinib	missense
KIT	816	Resistant	NA	NA	Preclinical	imatinib	missense
KIT	670	Resistant	NA	NA	Preclinical	imatinib	missense
KLC1-ALK	any	Sensitive	FDA Approved	Crizotinib, Ceritinib	NA	NA	Fusion
KRAS	Wild Type	Sensitive	FDA Approved	panitumumab	NA	NA	Wild Type
KRAS	p.K117N	Resistant	NA	NA	Clinical Trials	cetuximab/panitumumab (anti-EGFR antibodies)	missense
KRAS	p.G13D	Sensitive	Clinical Trials	cetuximab	NA	NA	missense
KRAS	CNA	Resistant	NA	NA	Preclinical	BRAF inhibitor + MEK inhibitor/anti-EGFR mAb	CNV
KRAS	146	Both	Preclinical	MEK inhibitors + PI3K pathway inhibitors	Clinical Trials	cetuximab, panitumumab	missense
KRAS	61	Both	Clinical Trials	MEK inhibitors	FDA Approved	panitumumab	missense
KRAS	13	Both	Clinical Trials	MEK inhibitors	FDA Approved	panitumumab	missense
KRAS	12	Both	Clinical Trials	MEK inhibitors	FDA Approved	panitumumab	missense
LRP1B	Expression	Sensitive	Clinical Trials	liposomal doxorubicin	NA	NA	Expression
MAP2K1	p.Y134C	Resistant	NA	NA	Preclinical	CI1040	missense
MAP2K1	p.V211D	Resistant	NA	NA	Preclinical	MEK inhibitors	missense
MAP2K1	p.R49C	Resistant	NA	NA	Preclinical	RDEA119	missense
MAP2K1	p.Q56P	Resistant	NA	NA	Preclinical	vemurafenib	missense
MAP2K1	p.P124S	Sensitive	Case Reports	BRAF inhibitors in BRAF mutant tumor	NA	NA	missense
MAP2K1	p.P124L	Resistant	NA	NA	Preclinical	BRAF inhibitors, MEK inhibitors	missense
MAP2K1	p.L215P	Both	Preclinical	ERK inhibitors	Preclinical	MEK inhibitors	missense
MAP2K1	p.K57N	Resistant	NA	NA	Preclinical	MEK inhibitors	missense
MAP2K1	p.K57E	Resistant	NA	NA	Preclinical	vemurafenib	missense
MAP2K1	p.K104N	Resistant	NA	NA	Preclinical	MEK inhibitors	missense
MAP2K1	p.I99T	Resistant	NA	NA	Preclinical	MEK inhibitors	missense
MAP2K1	p.I111S	Sensitive	Case Reports	BRAF inhibitors in BRAF mutant tumor	NA	NA	missense
MAP2K1	p.I111N	Resistant	NA	NA	Preclinical	MEK inhibitors	missense
MAP2K1	p.I103N	Both	Preclinical	ERK inhibitors	Preclinical	MEK inhibitors	missense
MAP2K1	p.H119P	Resistant	NA	NA	Preclinical	MEK inhibitors	missense
MAP2K1	p.G128D	Resistant	NA	NA	Preclinical	MEK inhibitors	missense
MAP2K1	p.F133L	Resistant	NA	NA	Preclinical	MEK inhibitors	missense
MAP2K1	p.F129L	Both	Preclinical	ERK inhibitors	Preclinical	MEK inhibitors	missense
MAP2K1	p.E203K	Resistant	NA	NA	Preclinical	vemurafenib	missense
MAP2K1	p.E120D	Resistant	NA	NA	Preclinical	MEK inhibitors	missense
MAP2K1	p.D67N	Resistant	NA	NA	Preclinical	MEK inhibitors	missense
MAP2K1	p.C121S	Both	Preclinical	novel MEK inhibitors	Preclinical	BRAF inhibitors, MEK inhibitors	missense
MAP2K1	124	Both	Preclinical	ERK inhibitors	Clinical Trials	BRAF inhibitors	missense
MAP2K1	115	Resistant	NA	NA	Preclinical	MEK inhibitors	missense
MAP2K2	p.V35M	Both	Preclinical	ERK inhibitors	Preclinical	BRAF inhibitors, MEK inhibitors	missense
MAP2K2	p.Q60P	Both	Preclinical	ERK inhibitors	Preclinical	BRAF + MEK inhibitors	missense
MAP2K2	p.N126D	Both	Preclinical	ERK inhibitors	Preclinical	BRAF inhibitors, MEK inhibitors	missense
MAP2K2	p.L46F	Both	Preclinical	ERK inhibitors	Preclinical	BRAF inhibitors, MEK inhibitors	missense
MAP2K2	p.C125S	Both	Preclinical	ERK inhibitors	Preclinical	BRAF inhibitors, MEK inhibitors	missense
MAPK14	p.P322R	Sensitive	Preclinical	BIRB0796	NA	NA	missense
MAPK14	p.E71K	Sensitive	Preclinical	VX702	NA	NA	missense
MAPK8	p.C79Y	Resistant	NA	NA	Preclinical	JNK9L	missense
MCL1	Expression	Resistant	NA	NA	Preclinical	anti-tubulin agents	Expression
MDM2	p.K369fs	Resistant	NA	NA	Preclinical	Nutlin3	frame_shift_del_unspecified
MDM2	p.C314Y	Resistant	NA	NA	Preclinical	Nutlin3	missense
MDM2	CNA	Sensitive	Clinical Trials	MDM2 inhibitors (tumors TP53 wt)	NA	NA	CNV
MDM4	CNA	Sensitive	Preclinical	MDM2/MDMX inhibitors	NA	NA	CNV
MET	p.Y1235D	Resistant	NA	NA	Preclinical	crizotinib	missense
MET	p.Y1230C	Resistant	NA	NA	Preclinical	crizotinib	missense
MET	p.V941L	Resistant	NA	NA	Preclinical	PHA665752	missense
MET	p.V1092I	Sensitive	Preclinical	crizotinib	NA	NA	missense
MET	p.T1010I	Sensitive	Preclinical	crizotinib	NA	NA	missense
MET	p.R988C	Sensitive	Preclinical	crizotinib	NA	NA	missense
MET	p.M1268T	Sensitive	Case Reports	MET inhibitors	NA	NA	missense
MET	p.M1250I	Sensitive	Preclinical	crizotinib	NA	NA	missense
MET	p.L530V	Resistant	NA	NA	Preclinical	PHA665752	missense
MET	p.H1112L	Sensitive	Preclinical	MET inhibitors	NA	NA	missense
MET	p.H1094R	Sensitive	Clinical Trials	MET inhibitors	NA	NA	missense
MET	p.H1049R	Sensitive	Preclinical	crizotinib	NA	NA	missense
MET	p.E815D	Resistant	NA	NA	Preclinical	PF2341066	missense
MET	p.D1240N	Sensitive	Preclinical	PHA665752	NA	NA	missense
MET	CNA	Both	Clinical Trials	MET inhibitors	Clinical Trials	trastuzumab in HER2-amplified	CNV
MET	any	Sensitive	Case Reports	crizotinib	NA	NA	Fusion
MGMT	CNL	Sensitive	Clinical Trials	temozolomide	NA	NA	CNV
MITF	CNA	Resistant	NA	NA	Preclinical	BRAF inhibitors	CNV
MLL	any	Sensitive	FDA Approved	daunorubicin	NA	NA	Fusion
MPL	p.W515F	Sensitive	Preclinical	JAK inhibitors	NA	NA	missense
MS4A1	Expression	Sensitive	FDA Approved	anti-CD20	NA	NA	Expression
MTOR	p.S2215Y	Sensitive	Preclinical	rapamycin	NA	NA	missense
MTOR	p.R2505P	Sensitive	Preclinical	rapamycin	NA	NA	missense
MTOR	p.R2152C	Resistant	NA	NA	Preclinical	Temsirolim	missense
MTOR	p.R1208C	Resistant	NA	NA	Preclinical	AZD8055	missense
MTOR	p.Q2223K	Sensitive	Case Reports	everolimus	NA	NA	missense
MTOR	p.P453L	Resistant	NA	NA	Preclinical	AZD8055	missense
MTOR	p.N1421D	Sensitive	Case Reports	everolimus	NA	NA	missense
MTOR	p.L1460P	Sensitive	Preclinical	rapamycin	NA	NA	missense
MTOR	p.K1771R	Sensitive	Case Reports	everolimus	NA	NA	missense
MTOR	p.I1973F	Sensitive	Case Reports	everolimus	NA	NA	missense
MTOR	p.F2108L	Both	Preclinical	mTOR kinase inhibitors	Preclinical	everolimus	missense
MTOR	p.E2419K	Sensitive	Case Reports	everolimus	NA	NA	missense
MTOR	p.E2014K	Sensitive	Case Reports	everolimus	NA	NA	missense
MTOR	p.A1134V	Resistant	NA	NA	Preclinical	AZD8055	missense
MYC	CNA	Sensitive	Preclinical	BET inhibitors	NA	NA	CNV
MYCN	CNA	Sensitive	Preclinical	BET inhibitors	NA	NA	CNV
MYD88	p.L265P	Sensitive	Preclinical	JAK inhibitors	NA	NA	missense
NF1	p.D1644A	Sensitive	Case Reports	everolimus	NA	NA	missense
NF1	CNL	Both	Preclinical	mTOR inhibitors	Preclinical	MEK inhibitors in BRAF mutant tumors	CNV
NF2	Expression	Resistant	NA	NA	Preclinical	FAK inhibitor	Expression
NF2	CNL	Sensitive	Clinical Trials	FAK inhibitors	NA	NA	CNV
NOTCH1	exon p.2245-2536	Sensitive	Clinical Trials	steroids early setting	NA	NA	missense
NOTCH1	exon p.1529-1723	Sensitive	Clinical Trials	steroids early setting	NA	NA	missense
NOTCH1	any	Sensitive	Preclinical	Gamma secretase inhibitors	NA	NA	Fusion
NOTCH2	exon p.2010-2472	Sensitive	Preclinical	Gamma secretase inhibitors	NA	NA	missense
NOTCH2	any	Sensitive	Preclinical	Gamma secretase inhibitors	NA	NA	Fusion
NPM-ALK	any	Sensitive	FDA Approved	Crizotinib, Ceritinib	NA	NA	Fusion
NRAS	Wild Type	Sensitive	FDA Approved	cetuximab, panitumumab	NA	NA	Wild Type
NRAS	p.Q61R	Both	Clinical Trials	MEK inhibitors	Clinical Trials	EGFR monoclonal antibodies	missense
NRAS	p.Q61P	Sensitive	Clinical Trials	MEK inhibitors	NA	NA	missense
NRAS	p.Q61L	Sensitive	Clinical Trials	MEK inhibitors	NA	NA	missense
NRAS	p.Q61K	Both	Clinical Trials	MEK inhibitors	Clinical Trials	EGFR monoclonal antibodies	missense
NRAS	p.Q61H	Sensitive	Clinical Trials	MEK inhibitors	NA	NA	missense
NRAS	p.Q61E	Sensitive	Clinical Trials	MEK inhibitors	NA	NA	missense
NRAS	p.G12V	Resistant	NA	NA	Clinical Trials	EGFR monoclonal antibodies	missense
NRAS	p.G12S	Resistant	NA	NA	Clinical Trials	EGFR monoclonal antibodies	missense
NRAS	p.G12D	Resistant	NA	NA	Clinical Trials	EGFR monoclonal antibodies	missense
NRAS	p.G12C	Both	Preclinical	ERK inhibitors	Clinical Trials	EGFR monoclonal antibodies	missense
NRAS	p.G12A	Resistant	NA	NA	Clinical Trials	EGFR monoclonal antibodies	missense
NRAS	61	Both	Clinical Trials	MEK inhibitors	FDA Approved	cetuximab, panitumumab	missense
NRAS	13	Both	Preclinical	MEK inhibitors	FDA Approved	cetuximab, panitumumab	missense
NRAS	12	Both	Preclinical	MEK inhibitors	FDA Approved	cetuximab, panitumumab	missense
NRG1	any	Sensitive	Preclinical	lapatinib	NA	NA	Fusion
NTRK1	p.R748W	Resistant	NA	NA	Preclinical	CEP701	missense
NTRK1	any	Sensitive	Case Reports	pan-TRK inhibitor	NA	NA	Fusion
NTRK3	any	Sensitive	Preclinical	midostaurin, IGF1R inhibitors, PI3K pathway inhibitors	NA	NA	Fusion
NUP214-ABL1	any	Sensitive	Clinical Trials	imatinib	NA	NA	Fusion
PAK1	Expression	Sensitive	Preclinical	PAK inhibitors	NA	NA	Expression
PARP1	p.P850L	Sensitive	Preclinical	AZD2281	NA	NA	missense
PDGFRA	Wild Type	Both	Clinical Trials	sunitinib	Clinical Trials	imatinib	Wild Type
PDGFRA	p.Y98*	Resistant	NA	NA	Preclinical	Sorafenib	nonsense
PDGFRA	p.Y849K	Sensitive	Case Reports	Imatinib, TKIs	NA	NA	missense
PDGFRA	p.V658A	Both	Preclinical	crenolanib	Preclinical	imatinib	missense
PDGFRA	p.V561D	Sensitive	Case Reports	Imatinib, TKIs	NA	NA	missense
PDGFRA	p.T674I	Resistant	NA	NA	Preclinical	imatinib	missense
PDGFRA	p.T266P	Sensitive	Preclinical	Pazopanib	NA	NA	missense
PDGFRA	p.T124fs	Both	Preclinical	Axitinib	Preclinical	Sorafenib	frame_shift_del_unspecified
PDGFRA	p.R841K	Sensitive	Preclinical	imatinib, crenolanib	NA	NA	missense
PDGFRA	p.P577S	Sensitive	Preclinical	imatinib, crenolanib	NA	NA	missense
PDGFRA	p.N848K	Sensitive	Case Reports	Imatinib, TKIs	NA	NA	missense
PDGFRA	p.N848I	Resistant	NA	NA	Preclinical	Sorafenib	missense
PDGFRA	p.H845Y	Sensitive	Preclinical	imatinib, crenolanib	NA	NA	missense
PDGFRA	p.G853D	Sensitive	Preclinical	imatinib, crenolanib	NA	NA	missense
PDGFRA	p.E241D	Sensitive	Preclinical	AMG706	NA	NA	missense
PDGFRA	p.D846Y	Sensitive	Case Reports	Imatinib, TKIs	NA	NA	missense
PDGFRA	p.D842V	Both	Preclinical	dasatinib	Preclinical	imatinib, sunitinib	missense
PDGFRA	Expression	Resistant	NA	NA	Preclinical	PDGFR inhibitors	Expression
PDGFRA	exon p.814-854	Sensitive	Clinical Trials	imatinib	NA	NA	missense
PDGFRA	exon p.631-668	Sensitive	Clinical Trials	imatinib	NA	NA	missense
PDGFRA	exon p.552-596	Sensitive	Clinical Trials	imatinib	NA	NA	missense
PDGFRA	any	Sensitive	FDA Approved	imatinib	NA	NA	Fusion
PDGFRB	p.T88I	Sensitive	Preclinical	TKI258	NA	NA	missense
PDGFRB	p.T882I	Sensitive	Preclinical	Pazopanib	NA	NA	missense
PDGFRB	p.L883M	Sensitive	Preclinical	TKI258	NA	NA	missense
PDGFRB	p.G181V	Sensitive	Preclinical	TKI258	NA	NA	missense
PDGFRB	p.E1069K	Resistant	NA	NA	Preclinical	Sorafenib	missense
PDGFRB	p.D166G	Sensitive	Preclinical	TKI258	NA	NA	missense
PDGFRB	any	Sensitive	FDA Approved	imatinib	NA	NA	Fusion
PDPK1	Expression	Sensitive	Preclinical	PI3K pathway inhibitors	NA	NA	Expression
PGR	Expression	Sensitive	FDA Approved	SERM, SERD, or AI	NA	NA	Expression
PIK3CA	p.H1047R	Sensitive	Clinical Trials	PI3K/AKT/mTOR inhibitors	NA	NA	missense
PIK3CA	p.E545K	Sensitive	Preclinical	mTOR inhibitors	NA	NA	missense
PIK3CA	p.E542K	Sensitive	Preclinical	mTOR inhibitors	NA	NA	missense
PIK3CA	CNA	Resistant	NA	NA	Preclinical	PI3K pathway inhibitors	CNV
PIK3CB	p.A686T	Resistant	NA	NA	Preclinical	NVPBEZ235	missense
PIK3CG	p.Y672*	Resistant	NA	NA	Preclinical	NVPBEZ235	nonsense
PIK3CG	p.T827R	Resistant	NA	NA	Preclinical	NVPBEZ235	missense
PIK3R2	p.N561D	Sensitive	Preclinical	mTOR inhibitors	NA	NA	missense
PIK3R2	p.A171V	Sensitive	Preclinical	mTOR inhibitors	NA	NA	missense
PLCG2	p.R665W	Resistant	NA	NA	Clinical Trials	ibrutinib	missense
PLCG2	p.L845F	Resistant	NA	NA	Clinical Trials	ibrutinib	missense
PLK1	p.S107N	Resistant	NA	NA	Preclinical	BI2536	missense
PML-RARA	any	Sensitive	FDA Approved	ATRA + arsenic trioxide	NA	NA	Fusion
PRKCE	p.P507A	Sensitive	Preclinical	Bryostatin	NA	NA	missense
PRKCE	p.E149K	Sensitive	Preclinical	Bryostatin	NA	NA	missense
PRKCH	Expression	Sensitive	Preclinical	trametinib (plus imatinib in BCR-ABL)	NA	NA	Expression
PRKCSH	p.E325in_frame_del	Sensitive	Preclinical	Bryostatin	NA	NA	in_frame_del
PRKDC	p.L1244fs	Sensitive	Preclinical	NU7441	NA	NA	frame_shift_del_unspecified
PTCH1	CNL	Sensitive	Case Reports	vismodegib	NA	NA	CNV
PTEN	Underexpression	Resistant	NA	NA	Clinical Trials	anti-EGFR mAbs	Expression
PTEN	CNL	Both	Clinical Trials	everolimus	Clinical Trials	PI3K alpha inhibitors	CNV
PTPN11	p.R498W	Sensitive	Preclinical	NSC87877	NA	NA	missense
RAC1	p.P29S	Resistant	NA	NA	Preclinical	BRAF inhibitors in BRAF mutant tumors	missense
RAD50	p.L1237F	Sensitive	Case Reports	irinotecan plus CHK1/2 inhibitor in ATM deficient tumor	NA	NA	missense
RAF1	p.S257P	Resistant	NA	NA	Preclinical	BRAF inhibitors in BRAF mutant tumors	missense
RAF1	p.G361A	Resistant	NA	NA	Preclinical	BRAF inhibitors in BRAF mutant tumors	missense
RAF1	any	Sensitive	Preclinical	sorafenib, MEK inhibitors	NA	NA	Fusion
RANBP2-ALK	any	Sensitive	Case Reports	Crizotinib	NA	NA	Fusion
RB1	CNL	Resistant	NA	NA	Preclinical	BRAF inhibitors in BRAF mutant tumor	CNV
RCSD1-ABL1	any	Resistant	NA	NA	Preclinical	dasatinib	Fusion
RET	p.M918T	Sensitive	FDA Approved	vandetanib	NA	NA	missense
RET	p.L746M	Sensitive	Preclinical	AMG706	NA	NA	missense
RET	p.C634Y	Sensitive	Clinical Trials	sorafenib	NA	NA	missense
RET	p.C634W	Sensitive	FDA Approved	vandetanib	NA	NA	missense
RET	p.C634R	Sensitive	Clinical Trials	sorafenib	NA	NA	missense
RET	p.C634F	Sensitive	Clinical Trials	sorafenib	NA	NA	missense
RET	p.A45T	Resistant	NA	NA	Preclinical	CEP701	missense
RET	CNA	Sensitive	Case Reports	sunitinib	NA	NA	CNV
RET	any	Sensitive	Clinical Trials	cabozantinib, vandetanib	NA	NA	Fusion
RET	918	Sensitive	FDA Approved	vandetanib	NA	NA	missense
RET	891	Sensitive	FDA Approved	vandetanib	NA	NA	missense
RET	804	Sensitive	Clinical Trials	sorafenib	NA	NA	missense
RET	791	Sensitive	FDA Approved	vandetanib	NA	NA	missense
RET	768	Sensitive	FDA Approved	vandetanib	NA	NA	missense
RET	634	Sensitive	FDA Approved	vandetanib	NA	NA	missense
RET	620	Sensitive	FDA Approved	vandetanib	NA	NA	missense
RET	618	Sensitive	FDA Approved	vandetanib	NA	NA	missense
RET-PTC1	any	Sensitive	Preclinical	RET inhibitors	NA	NA	Fusion
ROS1	p.G2032R	Both	Preclinical	cabozantinib	Preclinical	crizotinib	missense
ROS1	any	Sensitive	FDA Approved	crizotinib (ALK/MET/ROS1 TKI)	NA	NA	Fusion
RPS6KA2	p.A657S	Sensitive	Preclinical	CMK	NA	NA	missense
RPS6KA4	p.S236L	Sensitive	Preclinical	SL01011	NA	NA	missense
RPS6KA6	p.R310S	Resistant	NA	NA	Preclinical	CMK	missense
SF3B1	p.K700E	Sensitive	Preclinical	spliceosome inhibitor	NA	NA	missense
SMO	p.W281L	Resistant	NA	NA	Preclinical	Vismodegib	missense
SMO	p.V321M	Resistant	NA	NA	Preclinical	Vismodegib	missense
SMO	p.G497W	Resistant	NA	NA	Preclinical	Vismodegib	missense
SMO	p.D473Y	Resistant	NA	NA	Preclinical	Vismodegib	missense
SMO	p.D473H	Resistant	NA	NA	Preclinical	vismodegib	missense
SMO	p.A459V	Resistant	NA	NA	Preclinical	Vismodegib	missense
SQSTM1-ALK	any	Sensitive	FDA Approved	Crizotinib, Ceritinib	NA	NA	Fusion
SRC	p.V380M	Resistant	NA	NA	Preclinical	AZD0530	missense
STK11	p.D194E	Sensitive	Case Reports	everolimus	NA	NA	missense
STK11	CNL	Both	Preclinical	phenformin	Preclinical	MEK inhibitors + docetaxel in KRAS mutant	CNV
SUZ12	CNL	Sensitive	Preclinical	BET inhibitors	NA	NA	CNV
SYK	Expression	Sensitive	Preclinical	SYK inhibitors	NA	NA	Expression
TFG-ALK	any	Sensitive	FDA Approved	Crizotinib, Ceritinib	NA	NA	Fusion
TMPRSS2	any	Sensitive	Preclinical	DNA-PKc inhibitors	NA	NA	Fusion
TOP2A	CNA	Sensitive	Clinical Trials	anthracyclines	NA	NA	CNV
TPM3-ALK	any	Sensitive	FDA Approved	Crizotinib, Ceritinib	NA	NA	Fusion
TPM4-ALK	any	Sensitive	FDA Approved	Crizotinib, Ceritinib	NA	NA	Fusion
TRIM33-RET	any	Sensitive	Case Reports	cabozantinib	NA	NA	Fusion
VEGFA	CNA	Sensitive	Clinical Trials	sorafenib	NA	NA	CNV

## Sheet: 4
Table S4. Drugs represented in the GDSC Cell Line Data.
DRUG ID	DRUG NAME	SYNONYMS	TARGET	TARGET PATHWAY
1	Erlotinib		EGFR	EGFR signaling
3	Rapamycin	AY-22989,Sirolimus,WY-090217	mTOR	TOR signaling
5	Sunitinib	Sutent	PDGFRA, PDGFRB, KDR, KIT, FLT3	RTK signaling
6	PHA-665752		MET	RTK signaling
9	MG-132	zLLL	Proteasome	other
11	Paclitaxel	BMS-181339-01	Beta subunit of Tubulin	cytoskeleton
17	Cyclopamine	11-deoxojervine	SMO	other
29	AZ628		BRAF	ERK MAPK signaling
30	Sorafenib	BAY-439006, Nexavar	PDGFRA, PDGFRB, KDR, KIT, FLT3	RTK signaling
32	VX-680	MK-045,MK-0457,VX-68	AURKA, AURKB, AURKC, FLT3, ABL1, JAK2	mitosis
34	Imatinib	Gleevec,STI-571	ABL, KIT, PDGFR	ABL signaling
35	TAE684	NVP-TAE684	ALK	RTK signaling
37	Crizotinib	Xalkori,PF2341066	MET, ALK	RTK signaling
38	Saracatinib	AZD-0530,KIN001-045	SRC, ABL1	ABL signaling
41	S-Trityl-L-cysteine	NSC 83265	KIF11	mitosis
45	Z-LLNle-CHO	Z-L-Norleucine-CHO	gamma-secretase	other
51	Dasatinib	KIN001-005	ABL, SRC, KIT, PDGFR	ABL signaling
52	GNF-2	KIN001-013 (GNF-2 / 3-(6-(4-(trifluoromethoxy)phenylamino)pyrimidin-4-yl)benzamide)	ABL (T315I)	ABL signaling
53	CGP-60474	KIN001-019	CDK1,CDK2,CDK5,CDK7,CDK9	cell cycle
54	CGP-082996	CINK4,KIN001-021	CDK4	cell cycle
55	A-770041	KIN001-111	SRC family	other
56	WH-4-023	KIN001-112	SRC family, ABL	ABL signaling
59	WZ-1-84	KIN001-123	BMX	other
60	BI-2536	KIN001-124	PLK1, PLK2, PLK3	mitosis
62	BMS-536924	KIN001-126	IGF1R	IGFR signaling
63	BMS-509744	KIN001-127	ITK	other
64	CMK	KIN001-128	RSK	ERK MAPK signaling
71	Pyrimethamine		Dihydrofolate reductase (DHFR)	DNA replication
83	JW-7-52-1		mTOR	TOR signaling
86	A-443654	KIN001-139	AKT1, AKT2, AKT3	PI3K signaling
87	GW843682X	KIN001-134	PLK1	mitosis
88	MS-275	MS275	HDAC	chromain histone acetylation
89	Parthenolide		NFKB1	other
91	KIN001-135	KIN001-135	IKKE	other
94	TGX221		PI3K beta	PI3K signaling
104	Bortezomib	LDP-341,PS-341	Proteasome	other
106	XMD8-85	XMD8-85	ERK5 (MK07)	other
110	Roscovitine	Seliciclib	CDK family	cell cycle
111	Salubrinal	3-Phenyl-N-[2,2,2-trichloro-1-[[(8-quinolinylamino)thioxomethyl]amino]ethyl]-2-propenamide	GADD34-PP1C phosphatase	other
119	Lapatinib	Tykerb, Tyverb	EGFR, ERBB2	EGFR signaling
127	GSK269962A	KIN001-155	ROCK1,ROCK2	cytoskeleton
133	Doxorubicin	Doxil,Rubex	DNA intercalating	DNA replication
134	Etoposide		TOP2	DNA replication
135	Gemcitabine	Gemzar, LY-188011	DNA replication	DNA replication
136	Mitomycin C	Mytozytrex,NSC-26980	DNA crosslinker	DNA replication
140	Vinorelbine		Microtubules	cytoskeleton
147	NSC-87877		SHP-1 (PTPN6), SHP-2 (PTPN11)	other
150	Bicalutamide	ICI-176334	Androgen receptor (ANDR)	other
151	QS11	QS11	ARFGAP	other
152	CP466722	[2-(6,7-dimethoxyquinazolin-4-yl)-5-(pyridin-2-yl)-2H-1,2,4-triazol-3-amine]	ATM	Genome integrity
153	Midostaurin	PKC 412	KIT	RTK signaling
154	CHIR-99021	CT 99021	GSK3B	WNT signaling
155	AP-24534	KIN001-192	ABL	ABL signaling
156	AZD6482	KIN001-193	PI3K beta (P3C2B)	PI3K signaling
157	JNK-9L	KIN001-204	JNK, CDK9	JNK and p38 signaling
158	PF-562271	KIN001-205	FAK	cytoskeleton
159	HG-6-64-1	KIN001-206	BRAFV600E, TAK, MAP4K5	ERK MAPK signaling
163	JQ1	JQ1	BRD2, BRD3, BRD4	chromatin other
164	JQ12	JQ12	HDAC	chromain histone acetylation
165	DMOG	Dimethyloxalylglcine	Prolyl-4-Hydroxylase	other
166	FTI-277		Farnesyl-transferase (FNTA)	other
167	OSU-03012	AR-12	PDK1 (PDPK1)	PI3K signaling
170	Shikonin	Shikonin	unknown	other
171	AKT inhibitor VIII		AKT1, AKT2, AKT3	PI3K signaling
172	Embelin		XIAP	apoptosis regulation
173	FH535	FH535	unknown	other
175	PAC-1	PAC-1	CASP3 agonist	apoptosis regulation
176	IPA-3	IPA-3	PAK	cytoskeleton
177	GSK-650394		SGK3	other
178	BAY 61-3606		SYK	other
179	5-Fluorouracil	5-FU	DNA antimetabolite	DNA replication
180	Thapsigargin		ATPase, Ca++ transporting, cardiac muscle, slow twitch 2	other
182	Obatoclax Mesylate		BCL-2, BCL-XL, MCL-1	apoptosis regulation
184	BMS-754807		IGF1R	IGFR signaling
185	Lisitinib	OSI-906	IGF1R	IGFR signaling
186	Bexarotene	LG-100069,LGD-1069	Retinioic acid X family agonist	other
190	Bleomycin		DNA damage	DNA replication
192	LFM-A13	DDE-28	BTK	other
193	GW-2580	GW-2580	cFMS	RTK signaling
194	AUY922	VER-52296,NVP-AUY922	HSP90	other
196	Phenformin	Phenformin		metabolism
197	Bryostatin 1	Bryostatin 1	PRKC	other
199	Pazopanib	GW786034	VEGFR, PDGFRA, PDGFRB, KIT	RTK signaling
200	LAQ824	Dacinostat, NVP-LAQ824	HDAC	chromain histone acetylation
201	Epothilone B	GNF-PF-193	Microtubules	cytoskeleton
202	GSK1904529A	GSK1904529A	IGF1R	IGFR signaling
203	BMS345541	BMS345541	IKBKB	other
204	Tipifarnib		Farnesyl-transferase (FNTA)	other
205	BMS-708163	Avagacestat	gamma-secretase	other
206	Ruxolitinib	INCB-18424	JAK1, JAK2, TYK2	other
207	AS601245	AS601245	JNK	JNK and p38 signaling
208	Ispinesib Mesylate	SB-715992	KIF11	mitosis
211	TL-2-105		CRAF	ERK MAPK signaling
219	AT-7519		CDK9	cell cycle
221	TAK-715	KIN001-201	p38a	JNK and p38 signaling
222	BX-912	KIN001-175	PDK1 (PDPK1)	PI3K signaling
223	ZSTK474	KIN001-167	PI3K	PI3K signaling
224	AS605240	KIN001-173	PI3K gamma	PI3K signaling
225	Genentech Cpd 10		AURKA, AURKB	mitosis
226	GSK1070916		AURKB	mitosis
228	KIN001-102		AKT1	PI3K signaling
229	LY317615	Enzastaurin	PKCbeta	other
230	GSK429286A		ROCK2	cytoskeleton
231	FMK	KIN001-242	RSK	ERK MAPK signaling
235	QL-XII-47		BTK, BMX	other
238	CAL-101		PI3K delta	PI3K signaling
245	UNC0638		G9a(EHMT2), GLP(EHMT1)	chromatin histone methylation
249	XL-184	Cabozantinib	VEGFR, MET, RET, KIT, FLT1, FLT3, FLT4, TIE2,AXL	RTK signaling
252	WZ3105		CLK2, CNSK1E, FLT3, ULK1	other
253	XMD14-99		EPHB3, CAMK1	RTK signaling
254	AC220	Quizartinib	FLT3	RTK signaling
255	CP724714		ERBB2	EGFR signaling
256	JW-7-24-1		LCK	other
257	NPK76-II-72-1		PLK3	mitosis
258	STF-62247		Autophagy	other
260	NG-25		TAK	other
261	TL-1-85		TAK	other
262	VX-11e		ERK	ERK MAPK signaling
263	FR-180204		ERK	ERK MAPK signaling
265	Tubastatin A		HDAC6	chromain histone acetylation
266	Zibotentan	Zibotentan	Endothelin A Receptor	other
268	YM155	Sepantronium bromide	BIRC5 (Survivin)	apoptosis regulation
269	NSC-207895	XI-006	MDMX	p53 pathway
271	VNLG/124	4-(Butanoyloxymethyl)phenyl-(2E,4E,6E,8E)-3,7-dimethyl-9-(2,6,6-trimethylcyclohex-1-enyl)nona-2,4,6,8-tetraenoate	HDAC,RAR	chromain histone acetylation
272	AR-42	HDAC-42	HDAC	chromain histone acetylation
273	CUDC-101		HDAC, EGFR	chromain histone acetylation
274	Belinostat	PXD101	HDAC	chromain histone acetylation
275	I-BET-762	GSK525762A	BRD2, BRD3, BRD4	chromatin other
276	CAY10603		HDAC6	chromain histone acetylation
277	Linifanib	ABT-869	RTK	RTK signaling
279	BIX02189		MEK5	other
281	CH5424802		ALK	RTK signaling
282	EKB-569	Pelitinib	EGFR	EGFR signaling
283	GSK2126458	EX-8678	PI3K, mTOR	PI3K signaling
286	KIN001-236		TIE2	other
287	KIN001-244		PDK1 (PDPK1)	PI3K signaling
288	KIN001-055	WHI-P97, AC1L1GQE	JAK3, MNK1	other
290	KIN001-260	Bayer IKKb inhibitor	IKK	other
291	KIN001-266		TPL2,COT(M3K8)	other
292	Masitinib	AB1010	KIT	RTK signaling
293	MP470		PDGFR	RTK signaling
294	MPS-1-IN-1		MPS1	mitosis
295	BHG712	NVP-BHG712	EPHB4	RTK signaling
298	OSI-930		KIT, VEGFR, PDGFR	RTK signaling
299	OSI-027	A-1065	mTORC1/2	TOR signaling
300	CX-5461		RNA Pol I	other
301	PHA-793887		CDK-pan	cell cycle
302	PI-103		PI3K alpha,DNAPK	PI3K signaling
303	PIK-93		PI4K,PI3K	PI3K signaling
304	SB52334		ALK5	RTK signaling
305	TPCA-1		IKK	other
306	TG101348		JAK2	other
308	Foretinib	GSK1363089, XL-880	MET	RTK signaling
309	Y-39983		ROCK	cytoskeleton
310	YM201636		PYKfyve(FYV1)	other
312	Tivozanib	AV-951	VEGFR	RTK signaling
326	GSK690693		AKT	PI3K signaling
328	SNX-2112		HSP90	other
329	QL-XI-92		DDR1	RTK signaling
330	XMD13-2		RIPK	other
331	QL-X-138		MNK2, DNAPK, MTOR, BTK, JAK3	other
332	XMD15-27		CAMK2B, CLK2, DYRK1A, MAST1, STK39	other
333	T0901317		LXR	other
341	EX-527		SIRT1	other
344	THZ-2-49		CDK9	cell cycle
345	KIN001-270		CDK9	cell cycle
346	THZ-2-102-1		CDK7	cell cycle
1001	AICAR	N1-(b-D-Ribofuranosyl)-5-aminoimidazole-4-carboxamide	AMPK agonist	metabolism
1003	Camptothecin	7-Ethyl-10-Hydroxy-Camptothecin,SN-38	TOP1	DNA replication
1004	Vinblastine	Vinblastine sulphate	Microtubules	cytoskeleton
1005	Cisplatin	cis-Diammineplatinum(II) dichloride	DNA crosslinker	DNA replication
1006	Cytarabine	Ara-Cytidine,Arabinosyl Cytosine,U-19920	DNA synthesis	DNA replication
1007	Docetaxel	RP-56976	Microtubules	cytoskeleton
1008	Methotrexate		Dihydrofolate reductase (DHFR)	DNA replication
1009	ATRA	Tretinoin	Retinoic acid and retinoid X receptor agonist	other
1010	Gefitinib	ZD-1839	EGFR	EGFR signaling
1011	Navitoclax	ABT-263	BCL-2, BCL-XL, BCL-W	apoptosis regulation
1012	Vorinostat	SAHA	HDAC inhibitor Class I, IIa, IIb, IV	chromain histone acetylation
1013	Nilotinib		ABL	ABL signaling
1014	RDEA119	RDEA119	MEK1, MEK2	ERK MAPK signaling
1015	CI-1040	PD-18435,PD-184352	MEK1, MEK2	ERK MAPK signaling
1016	Temsirolimus	CCI-779	mTOR	TOR signaling
1017	Olaparib	KU0059436, AZD-2281	PARP1, PARP2	Genome integrity
1018	Veliparib	ABT-888	PARP1, PARP2	Genome integrity
1019	Bosutinib	SKI-606	SRC, ABL, TEC	ABL signaling
1020	Lenalidomide		TNF alpha	other
1021	Axitinib	AG-013736	PDGFR, KIT, VEGFR	RTK signaling
1022	AZD7762	AZD 7762	CHEK1, CHEK2	Genome integrity
1023	GW 441756		NTRK1	RTK signaling
1024	CEP-701	CEP-701	FLT3, JAK2, NTRK1, RET	RTK signaling
1025	SB 216763	SB 216763	GSK3A, GSK3B	WNT signaling
1026	17-AAG	tanespimycin	HSP90	other
1028	VX-702		p38	JNK and p38 signaling
1029	AMG-706	AMG-706	VEGFR, RET, c-KIT, PDGFR	RTK signaling
1030	KU-55933		ATM	Genome integrity
1031	Elesclomol		HSP70	other
1032	Afatinib	BIBW2992, Tovok	ERBB2, EGFR	EGFR signaling
1033	GDC0449	GDC0449	SMO	other
1036	PLX4720		BRAF	ERK MAPK signaling
1037	BX-795	BX 795	TBK1, PDPK1, IKK, AURKB, AURKC	other
1038	NU-7441	KU-57788	DNAPK	Genome integrity
1039	SL 0101-1		RSK, AURKB, PIM3	ERK MAPK signaling
1042	BIRB 0796		Androgen receptor (ANDR)	JNK and p38 signaling
1043	JNK Inhibitor VIII	JNK Inhibitor VIII	JNK	JNK and p38 signaling
1046	681640	681640	WEE1, CHEK1	cell cycle
1047	Nutlin-3a (-)	Nutlin-3a (-)	MDM2	p53 pathway
1049	PD-173074	PD-173074	FGFR1, FGFR3	RTK signaling
1050	ZM-447439	ZM447439	AURKB	mitosis
1052	RO-3306		CDK1	cell cycle
1053	MK-2206		AKT1, AKT2	PI3K signaling
1054	PD-0332991	Palbociclib Isethionate	CDK4, CDK6	cell cycle
1057	BEZ235	NVP-BEZ235	PI3K (class 1), mTORC1/2	PI3K signaling
1058	GDC0941		PI3K (class 1)	PI3K signaling
1059	AZD8055	AZD8055	mTORC1/2	TOR signaling
1060	PD-0325901	PD-0325901	MEK1, MEK2	ERK MAPK signaling
1061	SB590885		BRAF	ERK MAPK signaling
1062	selumetinib		MEK1, MEK2	ERK MAPK signaling
1066	AZD6482	WO2009093972	PI3K beta (P3C2B)	PI3K signaling
1067	CCT007093		PPM1D	other
1069	EHT 1864		Rac GTPases	cytoskeleton
1072	BMS-708163	Avagacestat	gamma-secretase	other
1091	BMS-536924	BMS-536924	IGF1R	IGFR signaling
1114	Cetuximab	Erbitux	EGFR	EGFR signaling
1129	PF-4708671		p70 S6KA	TOR signaling
1133	JNJ-26854165		MDM2	p53 pathway
1142	HG-5-113-01		LOK, LTK, TRCB, ABL(T315I)	ABL signaling
1143	HG-5-88-01		EGFR, ADCK4	EGFR signaling
1149	TW 37		BCL-2, BCL-XL	apoptosis regulation
1158	XMD11-85h		BRSK2, FLT4, MARK4, PRKCD, RET, SPRK1	other
1161	ZG-10		IRAK1	other
1164	XMD8-92		ERK5	other
1166	QL-VIII-58		mTOR, ATR	TOR signaling
1170	CCT018159		HSP90	other
1175	AG-014699	PF-01367338	PARP1, PARP2	Genome integrity
1192	GSK269962A	KIN001-155	ROCK1,ROCK2	cytoskeleton
1194	SB 505124	2-(5-Benzo[1,3]dioxol-5-yl-2-tert-butyl-3H-imidazol-4-yl)-6-methylpyridine hydrochloride hydrate	TGFbetaR-I (ALK5)	other
1199	Tamoxifen		ER	other
1203	QL-XII-61		BMX, BTK	other
1218	JQ1		BRD2, BRD3, BRD4	chromatin other
1219	PFI-1		BRD2, BRD3, BRD4	chromatin other
1230	IOX2		EGLN1	other
1236	UNC0638		G9a(EHMT2), GLP(EHMT1)	chromatin histone methylation
1239	YK 4-279		RNA helicase A	other
1241	CHIR-99021	CT 99021	GSK3B	WNT signaling
1242	(5Z)-7-Oxozeaenol		TAK1 (MAP3K7)	other
1243	piperlongumine		Increases ROS levels	other
1248	FK866	APO866	NAMPT inhibitor	metabolism
1259	Talazoparib	BMN-673	PARP1, PARP2	Genome integrity
1261	rTRAIL		DR4, DR5	apoptosis regulation
1262	UNC1215		L3MBTL3	other
1264	SGC0946		DOT1L (Q8TEK3)	chromatin histone methylation
1268	XAV939	NVP-XAV939	TNKS1, TNKS2	WNT signaling
1371	PLX4720		BRAF	ERK MAPK signaling
1372	Trametinib	GSK1120212	MEK1, MEK2	ERK MAPK signaling
1373	Dabrafenib	GSK2118436	BRAF	ERK MAPK signaling
1375	Temozolomide	Temodar	DNA akylating agent	DNA replication
1377	Afatinib		ERBB2, EGFR	EGFR signaling
1378	Bleomycin (50 uM)		DNA damage	DNA replication
1494	SN-38	7-ethyl-10-hydroxy-camptothecin	TOP1	DNA replication
1495	Olaparib	KU0059436, AZD2281	PARP1, PARP2	Genome integrity
1498	selumetinib		MEK1, MEK2	ERK MAPK signaling
1502	Bicalutamide	ICI-176334	Androgen receptor (ANDR)	other
1526	RDEA119		MEK1, MEK2	ERK MAPK signaling
1527	GDC0941		PI3K	PI3K signaling
1529	MLN4924		NEDD8-activating enzyme (NAE)	other

## Sheet: 5
Table S5. Cell lines that contain a sensitive mutation in DEPO.
COSMIC ID	Drug ID	Gene	Variant	Cancer Type	LN(IC50)	Type
906793	1371	BRAF	p.V600E	SKCM	-0.668952	Cancer Type Specific
906792	1371	BRAF	p.V600E	SKCM	2.79605	Cancer Type Specific
906795	1371	BRAF	p.V600E	THCA	1.93922	Cancer Type Non-Specific
910903	1371	BRAF	p.V600E	SKCM	3.70407	Cancer Type Specific
1240153	1371	BRAF	p.V600E	SKCM	-1.62112	Cancer Type Specific
1240154	1371	BRAF	p.V600E	THCA	1.779	Cancer Type Non-Specific
1674021	1371	BRAF	p.V600E	COADREAD	2.58772	Cancer Type Non-Specific
905939	1371	BRAF	p.V600E	COADREAD	3.02172	Cancer Type Non-Specific
1240128	1371	BRAF	p.V600E		0.879906	Cancer Type Non-Specific
1240125	1371	BRAF	p.V600E	SKCM	1.37404	Cancer Type Specific
1299078	1371	BRAF	p.V600E	SKCM	3.47204	Cancer Type Specific
909724	1371	BRAF	p.V600E	SKCM	1.44508	Cancer Type Specific
906830	1371	BRAF	p.V600E	SKCM	0.253337	Cancer Type Specific
906835	1371	BRAF	p.V600E	GBM	2.17882	Cancer Type Non-Specific
1240130	1371	BRAF	p.V600E	SKCM	-1.05931	Cancer Type Specific
905961	1371	BRAF	p.V600E	COADREAD	1.33181	Cancer Type Non-Specific
909698	1371	BRAF	p.V600E	COADREAD	3.3621	Cancer Type Non-Specific
907172	1371	BRAF	p.V600E	SKCM	2.40108	Cancer Type Specific
753596	1371	BRAF	p.V600E	SKCM	1.43417	Cancer Type Specific
1298144	1371	BRAF	p.V600E	SKCM	1.62155	Cancer Type Specific
907067	1371	BRAF	p.V600E	SKCM	1.19605	Cancer Type Specific
906865	1371	BRAF	p.V600E	SKCM	1.33404	Cancer Type Specific
1290771	1371	BRAF	p.V600E	COADREAD	1.62242	Cancer Type Non-Specific
907169	1371	BRAF	p.V600E	SKCM	2.64297	Cancer Type Specific
908449	1371	BRAF	p.V600E	LGG	2.19495	Cancer Type Non-Specific
910933	1371	BRAF	p.V600E	GBM	4.84778	Cancer Type Non-Specific
1287706	1371	BRAF	p.V600E	SKCM	0.568407	Cancer Type Specific
1240226	1371	BRAF	p.V600E	SKCM	2.2734	Cancer Type Specific
909713	1371	BRAF	p.V600E	SKCM	-0.885127	Cancer Type Specific
1240173	1371	BRAF	p.V600E	COADREAD	1.89378	Cancer Type Non-Specific
907794	1371	BRAF	p.V600E	COADREAD	2.58339	Cancer Type Non-Specific
905954	1371	BRAF	p.V600E	SKCM	0.551828	Cancer Type Specific
909725	1371	BRAF	p.V600E	SKCM	0.573646	Cancer Type Specific
908124	1371	BRAF	p.V600E	SKCM	0.0278687	Cancer Type Specific
1299081	1371	BRAF	p.V600E	SKCM	3.20228	Cancer Type Specific
924238	1371	BRAF	p.V600E	THCA	0.633017	Cancer Type Non-Specific
909759	1371	BRAF	p.V600E		1.78002	Cancer Type Non-Specific
909756	1371	BRAF	p.V600E		1.67169	Cancer Type Non-Specific
905976	1371	BRAF	p.V600E	SKCM	-0.430314	Cancer Type Specific
905977	1371	BRAF	p.V600E	SKCM	0.470473	Cancer Type Specific
687448	1371	BRAF	p.V600E	SKCM	1.9694	Cancer Type Specific
910921	1371	BRAF	p.V600E	SKCM	1.02755	Cancer Type Specific
909784	1371	BRAF	p.V600E	SKCM	2.68812	Cancer Type Specific
906696	1371	BRAF	p.V600E	THCA	0.548187	Cancer Type Non-Specific
909719	1371	BRAF	p.V600E	LIHC	2.42681	Cancer Type Non-Specific
905956	1371	BRAF	p.V600E	SKCM	1.36468	Cancer Type Specific
924151	1371	BRAF	p.V600E	THCA	0.469974	Cancer Type Non-Specific
925339	1371	BRAF	p.V600E	SKCM	-0.826823	Cancer Type Specific
906813	1371	BRAF	p.V600E	SKCM	1.4112	Cancer Type Specific
906818	1371	BRAF	p.V600E	SKCM	-0.184205	Cancer Type Specific
924102	1371	BRAF	p.V600E	THCA	4.46486	Cancer Type Non-Specific
924100	1371	BRAF	p.L597R	PRAD	4.45001	Cancer Type Non-Specific
924104	1371	BRAF	p.V600E	THCA	2.40895	Cancer Type Non-Specific
1299080	1371	BRAF	p.V600E	SKCM	-0.436475	Cancer Type Specific
930301	1371	BRAF	p.V600E	SKCM	4.74276	Cancer Type Specific
909747	1371	BRAF	p.V600E	COADREAD	3.77211	Cancer Type Non-Specific
1298160	1371	BRAF	p.V600E	SKCM	-0.0388719	Cancer Type Specific
906844	1371	BRAF	p.V600E	BRCA	-0.106727	Cancer Type Non-Specific
906999	1371	BRAF	p.V600E		4.56944	Cancer Type Non-Specific
909723	1371	BRAF	p.V600E	SKCM	1.70658	Cancer Type Specific
753545	1371	BRAF	p.V600E	SKCM	0.19467	Cancer Type Specific
909706	1371	BRAF	p.V600E	SKCM	1.29734	Cancer Type Specific
905974	1371	BRAF	p.V600E	SKCM	0.437039	Cancer Type Specific
905975	1371	BRAF	p.V600E	SKCM	-0.155051	Cancer Type Specific
909727	1371	BRAF	p.V600E	SKCM	3.55911	Cancer Type Specific
684052	1371	BRAF	p.V600E		2.65749	Cancer Type Non-Specific
906793	1373	BRAF	p.V600E	SKCM	-3.99407	Cancer Type Specific
906795	1373	BRAF	p.V600E	THCA	-0.943693	Cancer Type Non-Specific
1240153	1373	BRAF	p.V600E	SKCM	-4.50061	Cancer Type Specific
1240154	1373	BRAF	p.V600E	THCA	-2.88883	Cancer Type Non-Specific
1674021	1373	BRAF	p.V600E	COADREAD	1.51911	Cancer Type Non-Specific
905939	1373	BRAF	p.V600E	COADREAD	1.30827	Cancer Type Non-Specific
1240128	1373	BRAF	p.V600E		-2.97893	Cancer Type Non-Specific
1240125	1373	BRAF	p.V600E	SKCM	-2.2784	Cancer Type Specific
1299078	1373	BRAF	p.V600E	SKCM	1.87119	Cancer Type Specific
909724	1373	BRAF	p.V600E	SKCM	-2.2495	Cancer Type Specific
906830	1373	BRAF	p.V600E	SKCM	-3.966	Cancer Type Specific
924104	1373	BRAF	p.V600E	THCA	-1.57156	Cancer Type Non-Specific
906835	1373	BRAF	p.V600E	GBM	-1.42817	Cancer Type Non-Specific
1240130	1373	BRAF	p.V600E	SKCM	-4.67262	Cancer Type Specific
909698	1373	BRAF	p.V600E	COADREAD	0.560162	Cancer Type Non-Specific
907172	1373	BRAF	p.V600E	SKCM	-0.732862	Cancer Type Specific
753596	1373	BRAF	p.V600E	SKCM	-2.27849	Cancer Type Specific
907067	1373	BRAF	p.V600E	SKCM	-2.37145	Cancer Type Specific
906865	1373	BRAF	p.V600E	SKCM	-3.20915	Cancer Type Specific
908449	1373	BRAF	p.V600E	LGG	-1.20889	Cancer Type Non-Specific
910933	1373	BRAF	p.V600E	GBM	4.97082	Cancer Type Non-Specific
1287706	1373	BRAF	p.V600E	SKCM	-3.58281	Cancer Type Specific
1240226	1373	BRAF	p.V600E	SKCM	-0.76371	Cancer Type Specific
909713	1373	BRAF	p.V600E	SKCM	-4.27342	Cancer Type Specific
1240173	1373	BRAF	p.V600E	COADREAD	-2.54015	Cancer Type Non-Specific
907794	1373	BRAF	p.V600E	COADREAD	1.32598	Cancer Type Non-Specific
905954	1373	BRAF	p.V600E	SKCM	-3.21064	Cancer Type Specific
909725	1373	BRAF	p.V600E	SKCM	-2.57752	Cancer Type Specific
908124	1373	BRAF	p.V600E	SKCM	-4.03878	Cancer Type Specific
924238	1373	BRAF	p.V600E	THCA	-4.01981	Cancer Type Non-Specific
909759	1373	BRAF	p.V600E		-2.21222	Cancer Type Non-Specific
909756	1373	BRAF	p.V600E		-2.39937	Cancer Type Non-Specific
907275	1373	KIT	p.N822K	LAML	0.69837	Cancer Type Non-Specific
905976	1373	BRAF	p.V600E	SKCM	-3.47928	Cancer Type Specific
905977	1373	BRAF	p.V600E	SKCM	-3.35457	Cancer Type Specific
687448	1373	BRAF	p.V600E	SKCM	-2.21344	Cancer Type Specific
910921	1373	BRAF	p.V600E	SKCM	-2.79271	Cancer Type Specific
906696	1373	BRAF	p.V600E	THCA	-3.39569	Cancer Type Non-Specific
905956	1373	BRAF	p.V600E	SKCM	-1.40586	Cancer Type Specific
924151	1373	BRAF	p.V600E	THCA	-2.80428	Cancer Type Non-Specific
925339	1373	BRAF	p.V600E	SKCM	-4.15787	Cancer Type Specific
906813	1373	BRAF	p.V600E	SKCM	3.77266	Cancer Type Specific
906818	1373	BRAF	p.V600E	SKCM	-3.19268	Cancer Type Specific
924102	1373	BRAF	p.V600E	THCA	1.83287	Cancer Type Non-Specific
924100	1373	BRAF	p.L597R	PRAD	3.57864	Cancer Type Non-Specific
1299080	1373	BRAF	p.V600E	SKCM	-3.74885	Cancer Type Specific
930301	1373	BRAF	p.V600E	SKCM	3.70689	Cancer Type Specific
909747	1373	BRAF	p.V600E	COADREAD	3.3832	Cancer Type Non-Specific
1298160	1373	BRAF	p.V600E	SKCM	-3.26249	Cancer Type Specific
906844	1373	BRAF	p.V600E	BRCA	-4.24168	Cancer Type Non-Specific
906999	1373	BRAF	p.V600E		1.20248	Cancer Type Non-Specific
909723	1373	BRAF	p.V600E	SKCM	-3.16433	Cancer Type Specific
753545	1373	BRAF	p.V600E	SKCM	-3.79576	Cancer Type Specific
909706	1373	BRAF	p.V600E	SKCM	-0.861391	Cancer Type Specific
905974	1373	BRAF	p.V600E	SKCM	-3.31025	Cancer Type Specific
905975	1373	BRAF	p.V600E	SKCM	-3.56067	Cancer Type Specific
909727	1373	BRAF	p.V600E	SKCM	4.27619	Cancer Type Specific
684052	1373	BRAF	p.V600E		1.12485	Cancer Type Non-Specific
906793	1372	BRAF	p.V600E	SKCM	-6.38516	Cancer Type Specific
1330933	1372	KRAS	p.G12D		0.740873	Cancer Type Non-Specific
906795	1372	BRAF	p.V600E	THCA	-3.40964	Cancer Type Non-Specific
906875	1372	NRAS	p.Q61L	NB	2.65281	Cancer Type Non-Specific
1479988	1372	KRAS	p.G12D	OV	-5.04761	Cancer Type Specific
1240153	1372	BRAF	p.V600E	SKCM	-6.84837	Cancer Type Specific
907171	1372	NRAS	p.Q61L	SKCM	-6.20588	Cancer Type Specific
1240154	1372	BRAF	p.V600E	THCA	-5.87486	Cancer Type Non-Specific
1674021	1372	BRAF	p.V600E	COADREAD	-2.02167	Cancer Type Non-Specific
905938	1372	NRAS	p.Q61L	LAML	-0.241736	Cancer Type Non-Specific
905939	1372	BRAF	p.V600E	COADREAD	-5.17588	Cancer Type Non-Specific
724838	1372	KRAS	p.G12C	BLCA	-1.34588	Cancer Type Non-Specific
724863	1372	KRAS	p.G12C		0.118533	Cancer Type Non-Specific
722045	1372	KRAS	p.G12C	LUAD	-2.37623	Cancer Type Specific
724866	1372	KRAS	p.G13C	LUAD	-2.6779	Cancer Type Specific
1240128	1372	BRAF	p.V600E		-5.41353	Cancer Type Non-Specific
1240125	1372	BRAF	p.V600E	SKCM	-3.77726	Cancer Type Specific
1240124	1372	KRAS	p.G12D	COADREAD	-5.01102	Cancer Type Non-Specific
1299078	1372	BRAF	p.V600E	SKCM	-1.34656	Cancer Type Specific
909724	1372	BRAF	p.V600E	SKCM	-3.92514	Cancer Type Specific
909770	1372	KRAS	p.G12D	STAD	-0.871417	Cancer Type Non-Specific
909774	1372	NRAS	p.Q61K		-4.20919	Cancer Type Non-Specific
907291	1372	KRAS	p.G12D	COADREAD	0.023815	Cancer Type Non-Specific
925348	1372	KRAS	p.G12D	PAAD	-2.41639	Cancer Type Specific
907058	1372	NRAS	p.Q61K	SKCM	-6.05873	Cancer Type Specific
907051	1372	KRAS	p.G12D	UCEC	1.90958	Cancer Type Non-Specific
906830	1372	BRAF	p.V600E	SKCM	-6.31943	Cancer Type Specific
906835	1372	BRAF	p.V600E	GBM	-1.36862	Cancer Type Non-Specific
1240130	1372	BRAF	p.V600E	SKCM	-7.21885	Cancer Type Specific
910907	1372	KRAS	p.G12D	PAAD	-1.83337	Cancer Type Specific
1330942	1372	NRAS	p.Q61H	LAML	0.171608	Cancer Type Non-Specific
1660035	1372	KRAS	p.G12D	COADREAD	-1.00174	Cancer Type Non-Specific
1660034	1372	KRAS	p.G12D	COADREAD	-3.9931	Cancer Type Non-Specific
910546	1372	KRAS	p.G12R	PAAD	-5.83782	Cancer Type Specific
971777	1372	NRAS	p.Q61K	SKCM	-2.73298	Cancer Type Specific
905969	1372	KRAS	p.G12V	OV	-5.33499	Cancer Type Specific
905964	1372	KRAS	p.G12A	MM	-0.418169	Cancer Type Non-Specific
905961	1372	BRAF	p.V600E	COADREAD	-4.82097	Cancer Type Non-Specific
905962	1372	KRAS	p.G12V	COADREAD	-4.41637	Cancer Type Non-Specific
998189	1372	KRAS	p.G12D	COADREAD	-3.22726	Cancer Type Non-Specific
909698	1372	BRAF	p.V600E	COADREAD	-3.03625	Cancer Type Non-Specific
907172	1372	BRAF	p.V600E	SKCM	-2.91162	Cancer Type Specific
724859	1372	KRAS	p.Q61K	LUAD	-4.96814	Cancer Type Specific
724855	1372	KRAS	p.G12V		-3.8797	Cancer Type Non-Specific
909735	1372	KRAS	p.G12V	UCEC	-3.27531	Cancer Type Non-Specific
753595	1372	KRAS	p.G12V	PAAD	-5.85981	Cancer Type Specific
909736	1372	NRAS	p.Q61K	LIHC	-1.94212	Cancer Type Non-Specific
753596	1372	BRAF	p.V600E	SKCM	-5.28339	Cancer Type Specific
1298475	1372	KRAS	p.G12D	PAAD	-4.08628	Cancer Type Specific
1298141	1372	KRAS	p.Q61H	PAAD	-1.46202	Cancer Type Specific
753581	1372	NRAS	p.Q61K	SKCM	-3.11318	Cancer Type Specific
1298145	1372	NRAS	p.Q61R	SKCM	0.402009	Cancer Type Specific
907067	1372	BRAF	p.V600E	SKCM	-5.2619	Cancer Type Specific
907064	1372	NRAS	p.Q61K		-3.33939	Cancer Type Non-Specific
907065	1372	NRAS	p.Q61R	BLCA	-0.546375	Cancer Type Non-Specific
907069	1372	KRAS	p.G12D		-5.41962	Cancer Type Non-Specific
906865	1372	BRAF	p.V600E	SKCM	-5.64994	Cancer Type Specific
1290771	1372	BRAF	p.V600E	COADREAD	-5.93738	Cancer Type Non-Specific
1503365	1372	KRAS	p.G12A	ESCA	-3.61021	Cancer Type Non-Specific
925347	1372	KRAS	p.G12D	PAAD	2.32139	Cancer Type Specific
724839	1372	KRAS	p.G12C	CESC	-2.3015	Cancer Type Non-Specific
1480362	1372	KRAS	p.G12C	OV	-1.19994	Cancer Type Specific
1480360	1372	KRAS	p.G12D	OV	-2.44445	Cancer Type Specific
1298533	1372	KRAS	p.G12D	PAAD	-4.9066	Cancer Type Specific
925346	1372	KRAS	p.G12V	PAAD	-2.73826	Cancer Type Specific
1298539	1372	KRAS	p.G12V		-5.28017	Cancer Type Non-Specific
908449	1372	BRAF	p.V600E	LGG	-1.42174	Cancer Type Non-Specific
909248	1372	NRAS	p.Q61R	MB	-6.04642	Cancer Type Non-Specific
910932	1372	NRAS	p.Q61L	SKCM	-5.6635	Cancer Type Specific
910933	1372	BRAF	p.V600E	GBM	2.25044	Cancer Type Non-Specific
1298216	1372	KRAS	p.G12D	PAAD	-0.220031	Cancer Type Specific
1298218	1372	KRAS	p.G12R	PAAD	-4.44252	Cancer Type Specific
1298219	1372	KRAS	p.G12V		-0.451658	Cancer Type Non-Specific
1327769	1372	NRAS	p.Q61K	DLBC	0.0227888	Cancer Type Non-Specific
1287706	1372	BRAF	p.V600E	SKCM	-6.0398	Cancer Type Specific
1327766	1372	NRAS	p.Q61K	MM	0.745637	Cancer Type Non-Specific
906853	1372	KRAS	p.G12D		-4.4622	Cancer Type Non-Specific
1240222	1372	KRAS	p.G13C	OV	-2.27054	Cancer Type Specific
1240223	1372	NRAS	p.Q61R	THCA	-0.381751	Cancer Type Non-Specific
1240226	1372	BRAF	p.V600E	SKCM	-1.94197	Cancer Type Specific
1290455	1372	NRAS	p.Q61L	LAML	-5.91834	Cancer Type Non-Specific
906828	1372	KRAS	p.G12R	THCA	-4.00321	Cancer Type Non-Specific
906821	1372	KRAS	p.G12V	PAAD	-0.993238	Cancer Type Specific
909713	1372	BRAF	p.V600E	SKCM	-6.70643	Cancer Type Specific
722046	1372	KRAS	p.G12C	LUAD	-4.98642	Cancer Type Specific
1290907	1372	KRAS	p.G12V	COADREAD	-3.88138	Cancer Type Non-Specific
724869	1372	KRAS	p.G12D	PAAD	-5.28798	Cancer Type Specific
724868	1372	KRAS	p.G12C	LUAD	-4.2057	Cancer Type Specific
753563	1372	NRAS	p.Q61K	MM	-2.27096	Cancer Type Non-Specific
906820	1372	NRAS	p.Q61K	NB	-6.214	Cancer Type Non-Specific
1240173	1372	BRAF	p.V600E	COADREAD	-5.78142	Cancer Type Non-Specific
753579	1372	NRAS	p.Q61K	SKCM	-6.021	Cancer Type Specific
907794	1372	BRAF	p.V600E	COADREAD	-3.76003	Cancer Type Non-Specific
907796	1372	KRAS	p.G12C		-2.02414	Cancer Type Non-Specific
910689	1372	KRAS	p.G12D	COADREAD	-3.00442	Cancer Type Non-Specific
905954	1372	BRAF	p.V600E	SKCM	-5.6432	Cancer Type Specific
909726	1372	NRAS	p.Q61K	SKCM	-5.96597	Cancer Type Specific
909725	1372	BRAF	p.V600E	SKCM	-4.84142	Cancer Type Specific
908124	1372	BRAF	p.V600E	SKCM	-6.2738	Cancer Type Specific
908125	1372	NRAS	p.Q61L	SKCM	-4.38784	Cancer Type Specific
1299062	1372	NRAS	p.Q61R	SCLC	-4.40033	Cancer Type Non-Specific
1299081	1372	BRAF	p.V600E	SKCM	-3.1353	Cancer Type Specific
924238	1372	BRAF	p.V600E	THCA	-6.04471	Cancer Type Non-Specific
924239	1372	NRAS	p.Q61H	MM	0.918403	Cancer Type Non-Specific
722066	1372	KRAS	p.Q61L	LUAD	-0.0314271	Cancer Type Specific
909759	1372	BRAF	p.V600E		-2.77556	Cancer Type Non-Specific
909756	1372	BRAF	p.V600E		-4.6294	Cancer Type Non-Specific
909757	1372	KRAS	p.Q61L	COADREAD	0.904718	Cancer Type Non-Specific
909755	1372	KRAS	p.G12C	COADREAD	-1.94244	Cancer Type Non-Specific
909753	1372	KRAS	p.G12V	OV	-4.71755	Cancer Type Specific
910850	1372	NRAS	p.Q61L	LIHC	-2.73834	Cancer Type Non-Specific
905976	1372	BRAF	p.V600E	SKCM	-5.73788	Cancer Type Specific
905977	1372	BRAF	p.V600E	SKCM	-6.05739	Cancer Type Specific
905943	1372	KRAS	p.Q61H		-0.582303	Cancer Type Non-Specific
905942	1372	KRAS	p.G12C	LUAD	-2.22956	Cancer Type Specific
687448	1372	BRAF	p.V600E	SKCM	-3.58654	Cancer Type Specific
1290769	1372	KRAS	p.Q61H	COADREAD	-5.3042	Cancer Type Non-Specific
1330984	1372	NRAS	p.Q61K	DLBC	-0.905542	Cancer Type Non-Specific
1503370	1372	KRAS	p.G12A	LUAD	-2.3112	Cancer Type Specific
1298526	1372	KRAS	p.G12V	PAAD	-4.61143	Cancer Type Specific
1298356	1372	KRAS	p.G12V		0.550698	Cancer Type Non-Specific
1298352	1372	NRAS	p.Q61K		2.71456	Cancer Type Non-Specific
910926	1372	NRAS	p.Q61L	BLCA	-5.14151	Cancer Type Non-Specific
910921	1372	BRAF	p.V600E	SKCM	-4.72252	Cancer Type Specific
909784	1372	BRAF	p.V600E	SKCM	-3.8226	Cancer Type Specific
907300	1372	NRAS	p.Q61H	LAML	-0.112674	Cancer Type Non-Specific
906696	1372	BRAF	p.V600E	THCA	-6.39117	Cancer Type Non-Specific
909719	1372	BRAF	p.V600E	LIHC	-2.29423	Cancer Type Non-Specific
1240219	1372	KRAS	p.G12D	PAAD	-4.55088	Cancer Type Specific
1240218	1372	KRAS	p.G12D	PAAD	1.21346	Cancer Type Specific
724831	1372	NRAS	p.Q61K		-3.30911	Cancer Type Non-Specific
910915	1372	KRAS	p.G12V	PAAD	-4.60881	Cancer Type Specific
724834	1372	NRAS	p.Q61K	LUAD	-4.1317	Cancer Type Non-Specific
909904	1372	KRAS	p.G12V	PAAD	-2.4251	Cancer Type Specific
1290722	1372	NRAS	p.Q61R	THCA	-4.98432	Cancer Type Non-Specific
924151	1372	BRAF	p.V600E	THCA	-5.43751	Cancer Type Non-Specific
907795	1372	KRAS	p.G12D	COADREAD	-3.52469	Cancer Type Non-Specific
1327775	1372	KRAS	p.G12D	MM	-4.13624	Cancer Type Non-Specific
925339	1372	BRAF	p.V600E	SKCM	-6.43658	Cancer Type Specific
946361	1372	KRAS	p.G12V		-4.82404	Cancer Type Non-Specific
724874	1372	KRAS	p.G12V	LUAD	-6.08428	Cancer Type Specific
908472	1372	KRAS	p.G12A	LUAD	-0.947389	Cancer Type Specific
906813	1372	BRAF	p.V600E	SKCM	1.3278	Cancer Type Specific
925343	1372	NRAS	p.Q61K		-3.0333	Cancer Type Non-Specific
906818	1372	BRAF	p.V600E	SKCM	-6.01858	Cancer Type Specific
753572	1372	KRAS	p.G12D	PAAD	-0.662897	Cancer Type Specific
1240145	1372	KRAS	p.G12C	LUAD	-4.44484	Cancer Type Specific
1240143	1372	NRAS	p.Q61K	LUSC	-6.4098	Cancer Type Non-Specific
905949	1372	KRAS	p.G12S	LUAD	-4.95995	Cancer Type Specific
910692	1372	KRAS	p.G12V	SCLC	1.25751	Cancer Type Non-Specific
924102	1372	BRAF	p.V600E	THCA	-3.39555	Cancer Type Non-Specific
909264	1372	NRAS	p.Q61H		-4.88838	Cancer Type Non-Specific
909263	1372	KRAS	p.G12V	COADREAD	-4.45361	Cancer Type Non-Specific
724870	1372	KRAS	p.G12C	PAAD	-3.67951	Cancer Type Specific
924104	1372	BRAF	p.V600E	THCA	-3.93699	Cancer Type Non-Specific
724872	1372	KRAS	p.G12V	SCLC	2.31129	Cancer Type Non-Specific
724878	1372	KRAS	p.G12C	LUAD	-1.15602	Cancer Type Specific
724879	1372	KRAS	p.G12V	LUSC	-2.82616	Cancer Type Specific
1299080	1372	BRAF	p.V600E	SKCM	-6.33684	Cancer Type Specific
930301	1372	BRAF	p.V600E	SKCM	1.19762	Cancer Type Specific
909748	1372	KRAS	p.G12C	COADREAD	-3.62136	Cancer Type Non-Specific
909747	1372	BRAF	p.V600E	COADREAD	0.112033	Cancer Type Non-Specific
909746	1372	KRAS	p.G12A	COADREAD	-2.71547	Cancer Type Non-Specific
909740	1372	KRAS	p.G12D	COADREAD	-1.05357	Cancer Type Non-Specific
1298160	1372	BRAF	p.V600E	SKCM	-5.52597	Cancer Type Specific
907285	1372	KRAS	p.G12R	PAAD	-3.04613	Cancer Type Specific
1298167	1372	NRAS	p.Q61R	THCA	-6.00425	Cancer Type Non-Specific
907280	1372	NRAS	p.Q61R	LAML	-6.87461	Cancer Type Non-Specific
724873	1372	KRAS	p.G12A	LUAD	-1.96507	Cancer Type Specific
906844	1372	BRAF	p.V600E	BRCA	-6.58334	Cancer Type Non-Specific
909717	1372	KRAS	p.Q61H		-1.27227	Cancer Type Non-Specific
906999	1372	BRAF	p.V600E		-0.121198	Cancer Type Non-Specific
909718	1372	KRAS	p.G12V	COADREAD	-5.53838	Cancer Type Non-Specific
907792	1372	KRAS	p.G12S	COADREAD	-1.74674	Cancer Type Non-Specific
909723	1372	BRAF	p.V600E	SKCM	-4.4744	Cancer Type Specific
687820	1372	NRAS	p.Q61R	LUAD	-3.96788	Cancer Type Non-Specific
908467	1372	KRAS	p.Q61H		1.36851	Cancer Type Non-Specific
908465	1372	KRAS	p.G12C	LUAD	-2.95061	Cancer Type Specific
908460	1372	KRAS	p.G12V	LUAD	-2.06297	Cancer Type Specific
753546	1372	NRAS	p.Q61K	SKCM	-5.43804	Cancer Type Specific
753545	1372	BRAF	p.V600E	SKCM	-5.94501	Cancer Type Specific
910779	1372	KRAS	p.G12C		-1.08197	Cancer Type Non-Specific
949170	1372	KRAS	p.G12C	NB	-1.77336	Cancer Type Non-Specific
909706	1372	BRAF	p.V600E	SKCM	-3.52149	Cancer Type Specific
905974	1372	BRAF	p.V600E	SKCM	-5.88747	Cancer Type Specific
905975	1372	BRAF	p.V600E	SKCM	-6.17985	Cancer Type Specific
905972	1372	KRAS	p.G12C	LUAD	-3.16114	Cancer Type Specific
910702	1372	KRAS	p.G12D	PAAD	-4.32472	Cancer Type Specific
687780	1372	KRAS	p.G12V		-1.94362	Cancer Type Non-Specific
905952	1372	KRAS	p.G12D	ALL	1.09275	Cancer Type Non-Specific
909727	1372	BRAF	p.V600E	SKCM	0.616346	Cancer Type Specific
905955	1372	NRAS	p.Q61R	SKCM	-5.80075	Cancer Type Specific
1240201	1372	KRAS	p.G12V	PAAD	-4.20715	Cancer Type Specific
909721	1372	KRAS	p.G12D	LUAD	-1.99307	Cancer Type Specific
724828	1372	NRAS	p.Q61K	NB	-3.69933	Cancer Type Non-Specific
1297446	1372	NRAS	p.Q61H	ALL	-2.52613	Cancer Type Non-Specific
907312	1372	NRAS	p.Q61R	BLCA	-6.38326	Cancer Type Non-Specific
684052	1372	BRAF	p.V600E		-0.0787375	Cancer Type Non-Specific
1479988	283	KRAS	p.G12D	OV	-2.28515	Cancer Type Specific
906801	283	PIK3CA	p.H1047R	BRCA	-3.9266	Cancer Type Non-Specific
687995	283	PIK3CA	p.H1047R	SCLC	-5.89794	Cancer Type Non-Specific
905936	283	PIK3CA	p.H1047R	COADREAD	-3.80723	Cancer Type Specific
1674021	283	PIK3CA	p.H1047R	COADREAD	-2.46223	Cancer Type Specific
722045	283	KRAS	p.G12C	LUAD	-3.12731	Cancer Type Specific
724866	283	KRAS	p.G13C	LUAD	0.0101058	Cancer Type Specific
724868	283	KRAS	p.G12C	LUAD	-3.99174	Cancer Type Specific
909778	283	PIK3CA	p.H1047R	BRCA	-4.40351	Cancer Type Non-Specific
924106	283	PIK3CA	p.H1047R	BRCA	-2.70315	Cancer Type Non-Specific
749709	283	PIK3CA	p.H1047R	BRCA	-5.1764	Cancer Type Non-Specific
1660034	283	PIK3CA	p.H1047R	COADREAD	-3.93507	Cancer Type Specific
910948	283	PIK3CA	p.H1047R	BRCA	-1.9849	Cancer Type Non-Specific
905945	283	PIK3CA	p.H1047R	BRCA	-6.37929	Cancer Type Non-Specific
949168	283	PIK3CA	p.H1047R		0.333466	Cancer Type Non-Specific
905969	283	KRAS	p.G12V	OV	-3.58863	Cancer Type Specific
998189	283	PIK3CA	p.H1047R	COADREAD	-2.3506	Cancer Type Specific
909698	283	PIK3CA	p.H1047R	COADREAD	-3.08715	Cancer Type Specific
724859	283	KRAS	p.Q61K	LUAD	-1.21682	Cancer Type Specific
1480362	283	KRAS	p.G12C	OV	-2.64332	Cancer Type Specific
1480360	283	KRAS	p.G12D	OV	-3.68601	Cancer Type Specific
1240222	283	KRAS	p.G13C	OV	-1.48828	Cancer Type Specific
1290730	283	PIK3CA	p.H1047R	BLCA	-4.25482	Cancer Type Non-Specific
722046	283	KRAS	p.G12C	LUAD	-0.904513	Cancer Type Specific
753562	283	PIK3CA	p.H1047R	HNSC	-2.6055	Cancer Type Non-Specific
905959	283	PIK3CA	p.H1047R	OV	-4.73838	Cancer Type Non-Specific
908122	283	PIK3CA	p.H1047R	BRCA	-5.32867	Cancer Type Non-Specific
722066	283	KRAS	p.Q61L	LUAD	-3.30886	Cancer Type Specific
909753	283	KRAS	p.G12V	OV	-3.92157	Cancer Type Specific
905942	283	KRAS	p.G12C	LUAD	-0.880929	Cancer Type Specific
1503370	283	KRAS	p.G12A	LUAD	-3.33787	Cancer Type Specific
909256	283	PIK3CA	p.H1047R	BRCA	-5.62802	Cancer Type Non-Specific
724874	283	KRAS	p.G12V	LUAD	1.08886	Cancer Type Specific
908472	283	KRAS	p.G12A	LUAD	-2.6466	Cancer Type Specific
1240145	283	KRAS	p.G12C	LUAD	-3.37589	Cancer Type Specific
906837	283	PIK3CA	p.H1047R	HNSC	-2.18357	Cancer Type Non-Specific
724878	283	KRAS	p.G12C	LUAD	-1.27642	Cancer Type Specific
724879	283	KRAS	p.G12V	LUSC	-2.23775	Cancer Type Specific
722058	283	KRAS	p.G13C	LUAD	-0.40318	Cancer Type Specific
724873	283	KRAS	p.G12A	LUAD	-0.672241	Cancer Type Specific
908465	283	KRAS	p.G12C	LUAD	-4.32425	Cancer Type Specific
908460	283	KRAS	p.G12V	LUAD	1.26587	Cancer Type Specific
753541	283	PIK3CA	p.H1047R	HNSC	-5.31069	Cancer Type Non-Specific
905972	283	KRAS	p.G12C	LUAD	-2.29899	Cancer Type Specific
1240200	283	PIK3CA	p.H1047R	OV	-6.3038	Cancer Type Non-Specific
909721	283	KRAS	p.G12D	LUAD	-1.67733	Cancer Type Specific
924244	282	EGFR	p.T790M	LUAD	-2.83763	Cancer Type Specific
907320	282	EGFR	p.S768I	ESCA	-4.62424	Cancer Type Non-Specific
1247873	282	EGFR	p.L858R	LUAD	-2.98008	Cancer Type Specific
907319	282	EGFR	p.L861Q	ESCA	0.563035	Cancer Type Non-Specific
924244	119	EGFR	p.T790M	LUAD	1.95975	Cancer Type Specific
1330933	1498	KRAS	p.G12D		1.88928	Cancer Type Non-Specific
906875	1498	NRAS	p.Q61L	NB	3.71752	Cancer Type Non-Specific
1479988	1498	KRAS	p.G12D	OV	0.0404371	Cancer Type Specific
907171	1498	NRAS	p.Q61L	SKCM	-3.74308	Cancer Type Specific
905938	1498	NRAS	p.Q61L	LAML	0.482179	Cancer Type Non-Specific
724838	1498	KRAS	p.G12C	BLCA	1.53952	Cancer Type Non-Specific
905943	1498	KRAS	p.Q61H		1.42476	Cancer Type Non-Specific
724863	1498	KRAS	p.G12C		3.4947	Cancer Type Non-Specific
722045	1498	KRAS	p.G12C	LUAD	-0.162654	Cancer Type Specific
724866	1498	KRAS	p.G13C	LUAD	-0.0860733	Cancer Type Specific
1240124	1498	KRAS	p.G12D	COADREAD	-0.118554	Cancer Type Non-Specific
909770	1498	KRAS	p.G12D	STAD	1.72916	Cancer Type Non-Specific
909774	1498	NRAS	p.Q61K		0.273113	Cancer Type Non-Specific
907291	1498	KRAS	p.G12D	COADREAD	0.678986	Cancer Type Non-Specific
925348	1498	KRAS	p.G12D	PAAD	0.677846	Cancer Type Specific
907058	1498	NRAS	p.Q61K	SKCM	-1.67334	Cancer Type Specific
907051	1498	KRAS	p.G12D	UCEC	2.67799	Cancer Type Non-Specific
910907	1498	KRAS	p.G12D	PAAD	1.10444	Cancer Type Specific
1330942	1498	NRAS	p.Q61H	LAML	1.51585	Cancer Type Non-Specific
1660035	1498	KRAS	p.G12D	COADREAD	1.9997	Cancer Type Non-Specific
1660034	1498	KRAS	p.G12D	COADREAD	0.546229	Cancer Type Non-Specific
1298476	1498	KRAS	p.G12D	PAAD	0.0371204	Cancer Type Specific
910546	1498	KRAS	p.G12R	PAAD	-1.26723	Cancer Type Specific
971777	1498	NRAS	p.Q61K	SKCM	0.993066	Cancer Type Specific
905969	1498	KRAS	p.G12V	OV	-1.70463	Cancer Type Specific
905964	1498	KRAS	p.G12A	MM	1.68793	Cancer Type Non-Specific
905962	1498	KRAS	p.G12V	COADREAD	-0.807272	Cancer Type Non-Specific
998189	1498	KRAS	p.G12D	COADREAD	-0.661171	Cancer Type Non-Specific
724859	1498	KRAS	p.Q61K	LUAD	0.143216	Cancer Type Specific
724855	1498	KRAS	p.G12V		-0.944798	Cancer Type Non-Specific
909735	1498	KRAS	p.G12V	UCEC	0.232734	Cancer Type Non-Specific
753595	1498	KRAS	p.G12V	PAAD	0.262622	Cancer Type Specific
909736	1498	NRAS	p.Q61K	LIHC	0.424457	Cancer Type Non-Specific
1298475	1498	KRAS	p.G12D	PAAD	-0.727167	Cancer Type Specific
1298141	1498	KRAS	p.Q61H	PAAD	0.762966	Cancer Type Specific
753581	1498	NRAS	p.Q61K	SKCM	0.256735	Cancer Type Specific
1298145	1498	NRAS	p.Q61R	SKCM	4.06053	Cancer Type Specific
907064	1498	NRAS	p.Q61K		0.616941	Cancer Type Non-Specific
907065	1498	NRAS	p.Q61R	BLCA	1.7184	Cancer Type Non-Specific
1290797	1498	KRAS	p.G12V	PAAD	1.17382	Cancer Type Specific
907069	1498	KRAS	p.G12D		-1.1341	Cancer Type Non-Specific
1503365	1498	KRAS	p.G12A	ESCA	-1.03228	Cancer Type Non-Specific
925347	1498	KRAS	p.G12D	PAAD	3.31966	Cancer Type Specific
724839	1498	KRAS	p.G12C	CESC	0.93292	Cancer Type Non-Specific
1480362	1498	KRAS	p.G12C	OV	1.45559	Cancer Type Specific
1480360	1498	KRAS	p.G12D	OV	1.74676	Cancer Type Specific
1298534	1498	KRAS	p.G12V		1.1908	Cancer Type Non-Specific
1298533	1498	KRAS	p.G12D	PAAD	-0.287437	Cancer Type Specific
925346	1498	KRAS	p.G12V	PAAD	0.760634	Cancer Type Specific
1298539	1498	KRAS	p.G12V		-2.32737	Cancer Type Non-Specific
909248	1498	NRAS	p.Q61R	MB	-1.89522	Cancer Type Non-Specific
910932	1498	NRAS	p.Q61L	SKCM	-0.58471	Cancer Type Specific
1298216	1498	KRAS	p.G12D	PAAD	1.19	Cancer Type Specific
1298218	1498	KRAS	p.G12R	PAAD	-1.56021	Cancer Type Specific
1298219	1498	KRAS	p.G12V		0.866254	Cancer Type Non-Specific
1327769	1498	NRAS	p.Q61K	DLBC	1.75963	Cancer Type Non-Specific
1327766	1498	NRAS	p.Q61K	MM	2.103	Cancer Type Non-Specific
906853	1498	KRAS	p.G12D		-0.398613	Cancer Type Non-Specific
1240222	1498	KRAS	p.G13C	OV	0.619337	Cancer Type Specific
1240223	1498	NRAS	p.Q61R	THCA	1.74173	Cancer Type Non-Specific
1290455	1498	NRAS	p.Q61L	LAML	-2.98407	Cancer Type Non-Specific
906828	1498	KRAS	p.G12R	THCA	-1.27489	Cancer Type Non-Specific
906821	1498	KRAS	p.G12V	PAAD	0.833027	Cancer Type Specific
722046	1498	KRAS	p.G12C	LUAD	0.480178	Cancer Type Specific
1298136	1498	KRAS	p.G12D	PAAD	2.47456	Cancer Type Specific
1330950	1498	NRAS	p.Q61L	MM	1.07525	Cancer Type Non-Specific
1290907	1498	KRAS	p.G12V	COADREAD	-0.957456	Cancer Type Non-Specific
724869	1498	KRAS	p.G12D	PAAD	0.302862	Cancer Type Specific
724868	1498	KRAS	p.G12C	LUAD	0.239873	Cancer Type Specific
753563	1498	NRAS	p.Q61K	MM	0.852802	Cancer Type Non-Specific
753579	1498	NRAS	p.Q61K	SKCM	-2.40765	Cancer Type Specific
907796	1498	KRAS	p.G12C		1.9421	Cancer Type Non-Specific
910689	1498	KRAS	p.G12D	COADREAD	0.519721	Cancer Type Non-Specific
909726	1498	NRAS	p.Q61K	SKCM	-2.42776	Cancer Type Specific
908125	1498	NRAS	p.Q61L	SKCM	-0.775504	Cancer Type Specific
1299062	1498	NRAS	p.Q61R	SCLC	-0.287345	Cancer Type Non-Specific
924239	1498	NRAS	p.Q61H	MM	2.39065	Cancer Type Non-Specific
722066	1498	KRAS	p.Q61L	LUAD	2.36254	Cancer Type Specific
909757	1498	KRAS	p.Q61L	COADREAD	4.61602	Cancer Type Non-Specific
909755	1498	KRAS	p.G12C	COADREAD	-0.0523782	Cancer Type Non-Specific
909753	1498	KRAS	p.G12V	OV	-0.134172	Cancer Type Specific
910851	1498	KRAS	p.G12D		1.62402	Cancer Type Non-Specific
910850	1498	NRAS	p.Q61L	LIHC	0.64131	Cancer Type Non-Specific
905942	1498	KRAS	p.G12C	LUAD	2.61105	Cancer Type Specific
1290769	1498	KRAS	p.Q61H	COADREAD	-2.43271	Cancer Type Non-Specific
1330984	1498	NRAS	p.Q61K	DLBC	1.3074	Cancer Type Non-Specific
1503370	1498	KRAS	p.G12A	LUAD	1.51463	Cancer Type Specific
1298526	1498	KRAS	p.G12V	PAAD	-2.08705	Cancer Type Specific
1298356	1498	KRAS	p.G12V		2.40844	Cancer Type Non-Specific
1298352	1498	NRAS	p.Q61K		4.10085	Cancer Type Non-Specific
910926	1498	NRAS	p.Q61L	BLCA	0.679542	Cancer Type Non-Specific
907300	1498	NRAS	p.Q61H	LAML	1.11008	Cancer Type Non-Specific
1240212	1498	KRAS	p.G12D	CESC	0.69166	Cancer Type Non-Specific
1240219	1498	KRAS	p.G12D	PAAD	-0.533586	Cancer Type Specific
1240218	1498	KRAS	p.G12D	PAAD	2.48832	Cancer Type Specific
724831	1498	NRAS	p.Q61K		1.06955	Cancer Type Non-Specific
910915	1498	KRAS	p.G12V	PAAD	-0.422727	Cancer Type Specific
724834	1498	NRAS	p.Q61K	LUAD	-0.32215	Cancer Type Non-Specific
909904	1498	KRAS	p.G12V	PAAD	1.91375	Cancer Type Specific
1290722	1498	NRAS	p.Q61R	THCA	-0.735919	Cancer Type Non-Specific
907795	1498	KRAS	p.G12D	COADREAD	0.00582913	Cancer Type Non-Specific
1327775	1498	KRAS	p.G12D	MM	-1.72438	Cancer Type Non-Specific
946361	1498	KRAS	p.G12V		0.819004	Cancer Type Non-Specific
724874	1498	KRAS	p.G12V	LUAD	-1.53463	Cancer Type Specific
908472	1498	KRAS	p.G12A	LUAD	2.19755	Cancer Type Specific
925343	1498	NRAS	p.Q61K		0.117088	Cancer Type Non-Specific
753572	1498	KRAS	p.G12D	PAAD	3.74803	Cancer Type Specific
1240145	1498	KRAS	p.G12C	LUAD	0.898766	Cancer Type Specific
1240143	1498	NRAS	p.Q61K	LUSC	-1.66885	Cancer Type Non-Specific
905949	1498	KRAS	p.G12S	LUAD	-1.91656	Cancer Type Specific
910692	1498	KRAS	p.G12V	SCLC	2.41779	Cancer Type Non-Specific
909264	1498	NRAS	p.Q61H		-0.696515	Cancer Type Non-Specific
909263	1498	KRAS	p.G12V	COADREAD	0.21795	Cancer Type Non-Specific
724870	1498	KRAS	p.G12C	PAAD	0.610742	Cancer Type Specific
724872	1498	KRAS	p.G12V	SCLC	2.93363	Cancer Type Non-Specific
724878	1498	KRAS	p.G12C	LUAD	1.88891	Cancer Type Specific
724879	1498	KRAS	p.G12V	LUSC	1.80544	Cancer Type Specific
909748	1498	KRAS	p.G12C	COADREAD	0.624937	Cancer Type Non-Specific
909746	1498	KRAS	p.G12A	COADREAD	0.476815	Cancer Type Non-Specific
909740	1498	KRAS	p.G12D	COADREAD	1.81335	Cancer Type Non-Specific
907285	1498	KRAS	p.G12R	PAAD	-0.511604	Cancer Type Specific
1298167	1498	NRAS	p.Q61R	THCA	-1.67147	Cancer Type Non-Specific
907280	1498	NRAS	p.Q61R	LAML	-2.5717	Cancer Type Non-Specific
907043	1498	NRAS	p.Q61K		-0.384984	Cancer Type Non-Specific
724873	1498	KRAS	p.G12A	LUAD	0.986838	Cancer Type Specific
909717	1498	KRAS	p.Q61H		0.884045	Cancer Type Non-Specific
909718	1498	KRAS	p.G12V	COADREAD	-0.256261	Cancer Type Non-Specific
907792	1498	KRAS	p.G12S	COADREAD	0.39729	Cancer Type Non-Specific
687820	1498	NRAS	p.Q61R	LUAD	-0.906729	Cancer Type Non-Specific
908467	1498	KRAS	p.Q61H		2.73635	Cancer Type Non-Specific
908465	1498	KRAS	p.G12C	LUAD	0.943214	Cancer Type Specific
908460	1498	KRAS	p.G12V	LUAD	0.694096	Cancer Type Specific
753546	1498	NRAS	p.Q61K	SKCM	-3.16358	Cancer Type Specific
910779	1498	KRAS	p.G12C		1.74247	Cancer Type Non-Specific
949170	1498	KRAS	p.G12C	NB	1.18829	Cancer Type Non-Specific
905972	1498	KRAS	p.G12C	LUAD	0.469872	Cancer Type Specific
910702	1498	KRAS	p.G12D	PAAD	0.449136	Cancer Type Specific
687780	1498	KRAS	p.G12V		1.81423	Cancer Type Non-Specific
905952	1498	KRAS	p.G12D	ALL	1.84889	Cancer Type Non-Specific
905955	1498	NRAS	p.Q61R	SKCM	-1.79751	Cancer Type Specific
1240201	1498	KRAS	p.G12V	PAAD	-0.830353	Cancer Type Specific
909721	1498	KRAS	p.G12D	LUAD	1.08962	Cancer Type Specific
724828	1498	NRAS	p.Q61K	NB	-1.74181	Cancer Type Non-Specific
1297446	1498	NRAS	p.Q61H	ALL	1.78267	Cancer Type Non-Specific
907312	1498	NRAS	p.Q61R	BLCA	-1.11294	Cancer Type Non-Specific
906793	1061	BRAF	p.V600E	SKCM	0.282077	Cancer Type Specific
906795	1061	BRAF	p.V600E	THCA	1.95523	Cancer Type Non-Specific
910903	1061	BRAF	p.V600E	SKCM	3.79584	Cancer Type Specific
1240153	1061	BRAF	p.V600E	SKCM	-2.7644	Cancer Type Specific
1240154	1061	BRAF	p.V600E	THCA	0.973304	Cancer Type Non-Specific
1674021	1061	BRAF	p.V600E	COADREAD	3.34266	Cancer Type Non-Specific
905939	1061	BRAF	p.V600E	COADREAD	1.40295	Cancer Type Non-Specific
1240128	1061	BRAF	p.V600E		1.53633	Cancer Type Non-Specific
1240125	1061	BRAF	p.V600E	SKCM	0.847704	Cancer Type Specific
1299078	1061	BRAF	p.V600E	SKCM	2.45883	Cancer Type Specific
906830	1061	BRAF	p.V600E	SKCM	-1.80515	Cancer Type Specific
924104	1061	BRAF	p.V600E	THCA	3.1688	Cancer Type Non-Specific
906835	1061	BRAF	p.V600E	GBM	2.33725	Cancer Type Non-Specific
905961	1061	BRAF	p.V600E	COADREAD	-1.68106	Cancer Type Non-Specific
909698	1061	BRAF	p.V600E	COADREAD	2.01603	Cancer Type Non-Specific
907172	1061	BRAF	p.V600E	SKCM	2.1677	Cancer Type Specific
753596	1061	BRAF	p.V600E	SKCM	1.45492	Cancer Type Specific
1298144	1061	BRAF	p.V600E	SKCM	1.59647	Cancer Type Specific
907067	1061	BRAF	p.V600E	SKCM	-0.822328	Cancer Type Specific
906865	1061	BRAF	p.V600E	SKCM	1.6675	Cancer Type Specific
1290771	1061	BRAF	p.V600E	COADREAD	2.11248	Cancer Type Non-Specific
907169	1061	BRAF	p.V600E	SKCM	2.01484	Cancer Type Specific
908449	1061	BRAF	p.V600E	LGG	4.12387	Cancer Type Non-Specific
910933	1061	BRAF	p.V600E	GBM	4.35998	Cancer Type Non-Specific
1287706	1061	BRAF	p.V600E	SKCM	-2.29529	Cancer Type Specific
909713	1061	BRAF	p.V600E	SKCM	-0.127174	Cancer Type Specific
1240173	1061	BRAF	p.V600E	COADREAD	3.00808	Cancer Type Non-Specific
907794	1061	BRAF	p.V600E	COADREAD	2.24922	Cancer Type Non-Specific
909723	1061	BRAF	p.V600E	SKCM	1.33681	Cancer Type Specific
909727	1061	BRAF	p.V600E	SKCM	5.09711	Cancer Type Specific
905956	1061	BRAF	p.V600E	SKCM	0.613364	Cancer Type Specific
908124	1061	BRAF	p.V600E	SKCM	-2.3928	Cancer Type Specific
909759	1061	BRAF	p.V600E		1.83423	Cancer Type Non-Specific
905976	1061	BRAF	p.V600E	SKCM	3.86547	Cancer Type Specific
905977	1061	BRAF	p.V600E	SKCM	0.0994648	Cancer Type Specific
910921	1061	BRAF	p.V600E	SKCM	0.142576	Cancer Type Specific
909784	1061	BRAF	p.V600E	SKCM	-0.292844	Cancer Type Specific
906696	1061	BRAF	p.V600E	THCA	0.413071	Cancer Type Non-Specific
909719	1061	BRAF	p.V600E	LIHC	2.50613	Cancer Type Non-Specific
906813	1061	BRAF	p.V600E	SKCM	3.00061	Cancer Type Specific
924102	1061	BRAF	p.V600E	THCA	3.90337	Cancer Type Non-Specific
924100	1061	BRAF	p.L597R	PRAD	3.659	Cancer Type Non-Specific
1299080	1061	BRAF	p.V600E	SKCM	0.979256	Cancer Type Specific
909747	1061	BRAF	p.V600E	COADREAD	3.81873	Cancer Type Non-Specific
1298160	1061	BRAF	p.V600E	SKCM	1.15805	Cancer Type Specific
906844	1061	BRAF	p.V600E	BRCA	-0.457049	Cancer Type Non-Specific
753545	1061	BRAF	p.V600E	SKCM	0.0911911	Cancer Type Specific
909706	1061	BRAF	p.V600E	SKCM	-0.731286	Cancer Type Specific
905974	1061	BRAF	p.V600E	SKCM	0.951281	Cancer Type Specific
1299081	1061	BRAF	p.V600E	SKCM	1.84102	Cancer Type Specific
909724	1061	BRAF	p.V600E	SKCM	0.915789	Cancer Type Specific
906818	1061	BRAF	p.V600E	SKCM	-1.26582	Cancer Type Specific
684052	1061	BRAF	p.V600E		3.76469	Cancer Type Non-Specific
906790	1060	KRAS	p.G12D	STAD	-4.85011	Cancer Type Non-Specific
906875	1060	NRAS	p.Q61L	NB	-0.0545793	Cancer Type Non-Specific
1479988	1060	KRAS	p.G12D	OV	-2.42849	Cancer Type Specific
1330933	1060	KRAS	p.G12D		-2.19559	Cancer Type Non-Specific
907171	1060	NRAS	p.Q61L	SKCM	-4.41268	Cancer Type Specific
905938	1060	NRAS	p.Q61L	LAML	-5.10896	Cancer Type Non-Specific
905943	1060	KRAS	p.Q61H		-2.29291	Cancer Type Non-Specific
724863	1060	KRAS	p.G12C		1.69545	Cancer Type Non-Specific
722045	1060	KRAS	p.G12C	LUAD	0.357308	Cancer Type Specific
724866	1060	KRAS	p.G13C	LUAD	-3.24814	Cancer Type Specific
1240124	1060	KRAS	p.G12D	COADREAD	-1.56417	Cancer Type Non-Specific
909770	1060	KRAS	p.G12D	STAD	-2.17422	Cancer Type Non-Specific
909774	1060	NRAS	p.Q61K		-4.07417	Cancer Type Non-Specific
907051	1060	KRAS	p.G12D	UCEC	0.656595	Cancer Type Non-Specific
1330942	1060	NRAS	p.Q61H	LAML	-2.74027	Cancer Type Non-Specific
1660035	1060	KRAS	p.G12D	COADREAD	-0.768637	Cancer Type Non-Specific
1660034	1060	KRAS	p.G12D	COADREAD	-2.94345	Cancer Type Non-Specific
925348	1060	KRAS	p.G12D	PAAD	-1.28072	Cancer Type Specific
910546	1060	KRAS	p.G12R	PAAD	-3.1735	Cancer Type Specific
971777	1060	NRAS	p.Q61K	SKCM	-4.6655	Cancer Type Specific
905969	1060	KRAS	p.G12V	OV	-4.70328	Cancer Type Specific
905964	1060	KRAS	p.G12A	MM	-1.59906	Cancer Type Non-Specific
1298476	1060	KRAS	p.G12D	PAAD	-1.94958	Cancer Type Specific
905962	1060	KRAS	p.G12V	COADREAD	-3.73177	Cancer Type Non-Specific
998189	1060	KRAS	p.G12D	COADREAD	-3.12268	Cancer Type Non-Specific
724859	1060	KRAS	p.Q61K	LUAD	-0.0755235	Cancer Type Specific
724855	1060	KRAS	p.G12V		-0.553	Cancer Type Non-Specific
909735	1060	KRAS	p.G12V	UCEC	0.876354	Cancer Type Non-Specific
753595	1060	KRAS	p.G12V	PAAD	-1.30896	Cancer Type Specific
909736	1060	NRAS	p.Q61K	LIHC	-3.85973	Cancer Type Non-Specific
1298475	1060	KRAS	p.G12D	PAAD	-4.36669	Cancer Type Specific
1298141	1060	KRAS	p.Q61H	PAAD	-3.15836	Cancer Type Specific
753581	1060	NRAS	p.Q61K	SKCM	-3.23431	Cancer Type Specific
907064	1060	NRAS	p.Q61K		-2.68996	Cancer Type Non-Specific
907065	1060	NRAS	p.Q61R	BLCA	0.336145	Cancer Type Non-Specific
1290797	1060	KRAS	p.G12V	PAAD	-1.61841	Cancer Type Specific
907069	1060	KRAS	p.G12D		-1.78226	Cancer Type Non-Specific
1503365	1060	KRAS	p.G12A	ESCA	-4.32276	Cancer Type Non-Specific
724839	1060	KRAS	p.G12C	CESC	-3.28831	Cancer Type Non-Specific
1480362	1060	KRAS	p.G12C	OV	-2.05767	Cancer Type Specific
1480360	1060	KRAS	p.G12D	OV	-1.88895	Cancer Type Specific
1298534	1060	KRAS	p.G12V		-0.630749	Cancer Type Non-Specific
1298533	1060	KRAS	p.G12D	PAAD	-2.93406	Cancer Type Specific
1298539	1060	KRAS	p.G12V		-2.68259	Cancer Type Non-Specific
909248	1060	NRAS	p.Q61R	MB	-4.33535	Cancer Type Non-Specific
910932	1060	NRAS	p.Q61L	SKCM	-2.67151	Cancer Type Specific
1298216	1060	KRAS	p.G12D	PAAD	-0.0650086	Cancer Type Specific
1298218	1060	KRAS	p.G12R	PAAD	-3.339	Cancer Type Specific
1298219	1060	KRAS	p.G12V		-2.76936	Cancer Type Non-Specific
1327769	1060	NRAS	p.Q61K	DLBC	-1.81327	Cancer Type Non-Specific
1327766	1060	NRAS	p.Q61K	MM	-1.02581	Cancer Type Non-Specific
906853	1060	KRAS	p.G12D		-2.6808	Cancer Type Non-Specific
1240222	1060	KRAS	p.G13C	OV	-1.62328	Cancer Type Specific
1240223	1060	NRAS	p.Q61R	THCA	-4.75101	Cancer Type Non-Specific
1290455	1060	NRAS	p.Q61L	LAML	-4.15556	Cancer Type Non-Specific
906828	1060	KRAS	p.G12R	THCA	-2.56479	Cancer Type Non-Specific
906821	1060	KRAS	p.G12V	PAAD	-1.39494	Cancer Type Specific
1330950	1060	NRAS	p.Q61L	MM	-1.91798	Cancer Type Non-Specific
1290907	1060	KRAS	p.G12V	COADREAD	-3.62372	Cancer Type Non-Specific
724868	1060	KRAS	p.G12C	LUAD	-1.48121	Cancer Type Specific
753563	1060	NRAS	p.Q61K	MM	-0.268478	Cancer Type Non-Specific
906820	1060	NRAS	p.Q61K	NB	-6.81462	Cancer Type Non-Specific
753579	1060	NRAS	p.Q61K	SKCM	-4.34066	Cancer Type Specific
910689	1060	KRAS	p.G12D	COADREAD	-2.30599	Cancer Type Non-Specific
905955	1060	NRAS	p.Q61R	SKCM	-4.02032	Cancer Type Specific
908125	1060	NRAS	p.Q61L	SKCM	-3.96359	Cancer Type Specific
1299062	1060	NRAS	p.Q61R	SCLC	-2.99656	Cancer Type Non-Specific
1659818	1060	KRAS	p.G12A	MM	-1.39224	Cancer Type Non-Specific
924239	1060	NRAS	p.Q61H	MM	-0.470714	Cancer Type Non-Specific
722066	1060	KRAS	p.Q61L	LUAD	1.55412	Cancer Type Specific
909757	1060	KRAS	p.Q61L	COADREAD	-1.11487	Cancer Type Non-Specific
909753	1060	KRAS	p.G12V	OV	-3.99563	Cancer Type Specific
910851	1060	KRAS	p.G12D		-0.853443	Cancer Type Non-Specific
910850	1060	NRAS	p.Q61L	LIHC	-2.16308	Cancer Type Non-Specific
905942	1060	KRAS	p.G12C	LUAD	-2.11577	Cancer Type Specific
1290769	1060	KRAS	p.Q61H	COADREAD	-4.66043	Cancer Type Non-Specific
1330984	1060	NRAS	p.Q61K	DLBC	-1.53374	Cancer Type Non-Specific
1503370	1060	KRAS	p.G12A	LUAD	-3.16282	Cancer Type Specific
1298526	1060	KRAS	p.G12V	PAAD	-2.56089	Cancer Type Specific
1298356	1060	KRAS	p.G12V		-1.70289	Cancer Type Non-Specific
1298352	1060	NRAS	p.Q61K		1.40956	Cancer Type Non-Specific
910926	1060	NRAS	p.Q61L	BLCA	-2.24681	Cancer Type Non-Specific
907300	1060	NRAS	p.Q61H	LAML	-3.56137	Cancer Type Non-Specific
753624	1060	KRAS	p.G12V	PAAD	-2.82154	Cancer Type Specific
1240212	1060	KRAS	p.G12D	CESC	-2.48714	Cancer Type Non-Specific
1240219	1060	KRAS	p.G12D	PAAD	-4.17233	Cancer Type Specific
910915	1060	KRAS	p.G12V	PAAD	-2.26981	Cancer Type Specific
724834	1060	NRAS	p.Q61K	LUAD	-2.78958	Cancer Type Non-Specific
909904	1060	KRAS	p.G12V	PAAD	1.81791	Cancer Type Specific
1290722	1060	NRAS	p.Q61R	THCA	-3.23809	Cancer Type Non-Specific
1327775	1060	KRAS	p.G12D	MM	-2.03242	Cancer Type Non-Specific
946361	1060	KRAS	p.G12V		-2.55814	Cancer Type Non-Specific
925343	1060	NRAS	p.Q61K		-3.9068	Cancer Type Non-Specific
724870	1060	KRAS	p.G12C	PAAD	-4.4732	Cancer Type Specific
753574	1060	KRAS	p.G12C	ESCA	-2.82107	Cancer Type Non-Specific
925346	1060	KRAS	p.G12V	PAAD	-2.09666	Cancer Type Specific
1240145	1060	KRAS	p.G12C	LUAD	-3.89255	Cancer Type Specific
1240143	1060	NRAS	p.Q61K	LUSC	-3.63569	Cancer Type Non-Specific
905949	1060	KRAS	p.G12S	LUAD	-3.95147	Cancer Type Specific
910692	1060	KRAS	p.G12V	SCLC	-0.130127	Cancer Type Non-Specific
909263	1060	KRAS	p.G12V	COADREAD	-3.24504	Cancer Type Non-Specific
724874	1060	KRAS	p.G12V	LUAD	-3.31402	Cancer Type Specific
724872	1060	KRAS	p.G12V	SCLC	-1.09215	Cancer Type Non-Specific
724878	1060	KRAS	p.G12C	LUAD	0.282366	Cancer Type Specific
724879	1060	KRAS	p.G12V	LUSC	0.823455	Cancer Type Specific
909740	1060	KRAS	p.G12D	COADREAD	-1.43871	Cancer Type Non-Specific
907286	1060	KRAS	p.G12V	PAAD	-4.17484	Cancer Type Specific
907285	1060	KRAS	p.G12R	PAAD	-3.75962	Cancer Type Specific
1298167	1060	NRAS	p.Q61R	THCA	-4.7543	Cancer Type Non-Specific
907280	1060	NRAS	p.Q61R	LAML	-5.76928	Cancer Type Non-Specific
907043	1060	NRAS	p.Q61K		-1.82668	Cancer Type Non-Specific
724873	1060	KRAS	p.G12A	LUAD	-3.27037	Cancer Type Specific
909717	1060	KRAS	p.Q61H		-2.29216	Cancer Type Non-Specific
907795	1060	KRAS	p.G12D	COADREAD	-4.29101	Cancer Type Non-Specific
909718	1060	KRAS	p.G12V	COADREAD	-4.57937	Cancer Type Non-Specific
687820	1060	NRAS	p.Q61R	LUAD	-2.09238	Cancer Type Non-Specific
908467	1060	KRAS	p.Q61H		-0.735537	Cancer Type Non-Specific
908465	1060	KRAS	p.G12C	LUAD	-1.55849	Cancer Type Specific
753546	1060	NRAS	p.Q61K	SKCM	-5.52331	Cancer Type Specific
910779	1060	KRAS	p.G12C		-2.29652	Cancer Type Non-Specific
949170	1060	KRAS	p.G12C	NB	-2.31233	Cancer Type Non-Specific
905972	1060	KRAS	p.G12C	LUAD	-4.13661	Cancer Type Specific
910702	1060	KRAS	p.G12D	PAAD	-3.2922	Cancer Type Specific
687780	1060	KRAS	p.G12V		-1.38862	Cancer Type Non-Specific
905952	1060	KRAS	p.G12D	ALL	-0.812393	Cancer Type Non-Specific
909721	1060	KRAS	p.G12D	LUAD	-1.67984	Cancer Type Specific
724828	1060	NRAS	p.Q61K	NB	-4.04823	Cancer Type Non-Specific
1297446	1060	NRAS	p.Q61H	ALL	-1.79437	Cancer Type Non-Specific
907312	1060	NRAS	p.Q61R	BLCA	-1.95187	Cancer Type Non-Specific
906790	1062	KRAS	p.G12D	STAD	2.07435	Cancer Type Non-Specific
906875	1062	NRAS	p.Q61L	NB	3.15921	Cancer Type Non-Specific
1479988	1062	KRAS	p.G12D	OV	-0.0210988	Cancer Type Specific
1330933	1062	KRAS	p.G12D		2.69226	Cancer Type Non-Specific
907171	1062	NRAS	p.Q61L	SKCM	-2.19719	Cancer Type Specific
905938	1062	NRAS	p.Q61L	LAML	1.42566	Cancer Type Non-Specific
724863	1062	KRAS	p.G12C		4.6746	Cancer Type Non-Specific
724866	1062	KRAS	p.G13C	LUAD	2.49422	Cancer Type Specific
1240124	1062	KRAS	p.G12D	COADREAD	5.25297	Cancer Type Non-Specific
909770	1062	KRAS	p.G12D	STAD	3.75557	Cancer Type Non-Specific
909774	1062	NRAS	p.Q61K		2.4001	Cancer Type Non-Specific
907051	1062	KRAS	p.G12D	UCEC	3.45999	Cancer Type Non-Specific
1330942	1062	NRAS	p.Q61H	LAML	2.92182	Cancer Type Non-Specific
1660035	1062	KRAS	p.G12D	COADREAD	4.50756	Cancer Type Non-Specific
1660034	1062	KRAS	p.G12D	COADREAD	2.9476	Cancer Type Non-Specific
925348	1062	KRAS	p.G12D	PAAD	1.01223	Cancer Type Specific
910546	1062	KRAS	p.G12R	PAAD	-1.04496	Cancer Type Specific
971777	1062	NRAS	p.Q61K	SKCM	3.31732	Cancer Type Specific
905969	1062	KRAS	p.G12V	OV	4.18208	Cancer Type Specific
905964	1062	KRAS	p.G12A	MM	2.57328	Cancer Type Non-Specific
1298476	1062	KRAS	p.G12D	PAAD	0.12553	Cancer Type Specific
905962	1062	KRAS	p.G12V	COADREAD	3.30511	Cancer Type Non-Specific
998189	1062	KRAS	p.G12D	COADREAD	0.105185	Cancer Type Non-Specific
724859	1062	KRAS	p.Q61K	LUAD	1.09429	Cancer Type Specific
724855	1062	KRAS	p.G12V		2.15319	Cancer Type Non-Specific
909735	1062	KRAS	p.G12V	UCEC	2.67598	Cancer Type Non-Specific
753595	1062	KRAS	p.G12V	PAAD	1.02608	Cancer Type Specific
909736	1062	NRAS	p.Q61K	LIHC	4.06893	Cancer Type Non-Specific
1298475	1062	KRAS	p.G12D	PAAD	3.26528	Cancer Type Specific
1298141	1062	KRAS	p.Q61H	PAAD	3.0957	Cancer Type Specific
753581	1062	NRAS	p.Q61K	SKCM	3.35101	Cancer Type Specific
907064	1062	NRAS	p.Q61K		0.43984	Cancer Type Non-Specific
907065	1062	NRAS	p.Q61R	BLCA	3.17657	Cancer Type Non-Specific
1290797	1062	KRAS	p.G12V	PAAD	1.7663	Cancer Type Specific
907069	1062	KRAS	p.G12D		0.114884	Cancer Type Non-Specific
1503365	1062	KRAS	p.G12A	ESCA	4.51048	Cancer Type Non-Specific
724839	1062	KRAS	p.G12C	CESC	1.74245	Cancer Type Non-Specific
1480362	1062	KRAS	p.G12C	OV	1.32887	Cancer Type Specific
1480360	1062	KRAS	p.G12D	OV	3.10987	Cancer Type Specific
1298534	1062	KRAS	p.G12V		5.32596	Cancer Type Non-Specific
1298533	1062	KRAS	p.G12D	PAAD	4.15196	Cancer Type Specific
1298539	1062	KRAS	p.G12V		3.76172	Cancer Type Non-Specific
909248	1062	NRAS	p.Q61R	MB	-1.26639	Cancer Type Non-Specific
910932	1062	NRAS	p.Q61L	SKCM	0.715596	Cancer Type Specific
1298216	1062	KRAS	p.G12D	PAAD	2.76979	Cancer Type Specific
1298218	1062	KRAS	p.G12R	PAAD	-0.725747	Cancer Type Specific
1298219	1062	KRAS	p.G12V		1.62758	Cancer Type Non-Specific
1327769	1062	NRAS	p.Q61K	DLBC	3.68713	Cancer Type Non-Specific
1327766	1062	NRAS	p.Q61K	MM	2.86161	Cancer Type Non-Specific
906853	1062	KRAS	p.G12D		0.408793	Cancer Type Non-Specific
1240222	1062	KRAS	p.G13C	OV	2.59451	Cancer Type Specific
1240223	1062	NRAS	p.Q61R	THCA	-2.09161	Cancer Type Non-Specific
1290455	1062	NRAS	p.Q61L	LAML	-2.56178	Cancer Type Non-Specific
906828	1062	KRAS	p.G12R	THCA	0.134612	Cancer Type Non-Specific
906821	1062	KRAS	p.G12V	PAAD	1.32495	Cancer Type Specific
1330950	1062	NRAS	p.Q61L	MM	2.78427	Cancer Type Non-Specific
1290907	1062	KRAS	p.G12V	COADREAD	-1.23183	Cancer Type Non-Specific
724868	1062	KRAS	p.G12C	LUAD	2.20306	Cancer Type Specific
753563	1062	NRAS	p.Q61K	MM	3.51189	Cancer Type Non-Specific
906820	1062	NRAS	p.Q61K	NB	0.813292	Cancer Type Non-Specific
753579	1062	NRAS	p.Q61K	SKCM	-2.13329	Cancer Type Specific
910689	1062	KRAS	p.G12D	COADREAD	-0.0904638	Cancer Type Non-Specific
905955	1062	NRAS	p.Q61R	SKCM	3.61379	Cancer Type Specific
908125	1062	NRAS	p.Q61L	SKCM	4.20021	Cancer Type Specific
1299062	1062	NRAS	p.Q61R	SCLC	4.01906	Cancer Type Non-Specific
1659818	1062	KRAS	p.G12A	MM	2.57071	Cancer Type Non-Specific
924239	1062	NRAS	p.Q61H	MM	2.39485	Cancer Type Non-Specific
722066	1062	KRAS	p.Q61L	LUAD	4.15543	Cancer Type Specific
909757	1062	KRAS	p.Q61L	COADREAD	3.37107	Cancer Type Non-Specific
909753	1062	KRAS	p.G12V	OV	4.36096	Cancer Type Specific
910851	1062	KRAS	p.G12D		1.44528	Cancer Type Non-Specific
910850	1062	NRAS	p.Q61L	LIHC	2.70499	Cancer Type Non-Specific
905943	1062	KRAS	p.Q61H		0.67971	Cancer Type Non-Specific
905942	1062	KRAS	p.G12C	LUAD	2.33196	Cancer Type Specific
1290769	1062	KRAS	p.Q61H	COADREAD	2.52154	Cancer Type Non-Specific
1330984	1062	NRAS	p.Q61K	DLBC	3.35157	Cancer Type Non-Specific
1503370	1062	KRAS	p.G12A	LUAD	3.78997	Cancer Type Specific
1298526	1062	KRAS	p.G12V	PAAD	-0.754349	Cancer Type Specific
1298356	1062	KRAS	p.G12V		4.08779	Cancer Type Non-Specific
1298352	1062	NRAS	p.Q61K		3.58085	Cancer Type Non-Specific
910926	1062	NRAS	p.Q61L	BLCA	0.822888	Cancer Type Non-Specific
907300	1062	NRAS	p.Q61H	LAML	-1.43207	Cancer Type Non-Specific
753624	1062	KRAS	p.G12V	PAAD	3.98603	Cancer Type Specific
1240212	1062	KRAS	p.G12D	CESC	3.82081	Cancer Type Non-Specific
1240219	1062	KRAS	p.G12D	PAAD	-1.12005	Cancer Type Specific
910915	1062	KRAS	p.G12V	PAAD	0.969547	Cancer Type Specific
724834	1062	NRAS	p.Q61K	LUAD	-0.126956	Cancer Type Non-Specific
909904	1062	KRAS	p.G12V	PAAD	3.25746	Cancer Type Specific
1290722	1062	NRAS	p.Q61R	THCA	0.864244	Cancer Type Non-Specific
1327775	1062	KRAS	p.G12D	MM	3.1252	Cancer Type Non-Specific
946361	1062	KRAS	p.G12V		-0.427734	Cancer Type Non-Specific
925343	1062	NRAS	p.Q61K		3.22516	Cancer Type Non-Specific
724870	1062	KRAS	p.G12C	PAAD	2.62875	Cancer Type Specific
753574	1062	KRAS	p.G12C	ESCA	2.7011	Cancer Type Non-Specific
925346	1062	KRAS	p.G12V	PAAD	0.938521	Cancer Type Specific
1240145	1062	KRAS	p.G12C	LUAD	-0.108968	Cancer Type Specific
1240143	1062	NRAS	p.Q61K	LUSC	3.821	Cancer Type Non-Specific
905949	1062	KRAS	p.G12S	LUAD	3.58175	Cancer Type Specific
910692	1062	KRAS	p.G12V	SCLC	2.53453	Cancer Type Non-Specific
909263	1062	KRAS	p.G12V	COADREAD	-0.773982	Cancer Type Non-Specific
724874	1062	KRAS	p.G12V	LUAD	-0.369924	Cancer Type Specific
724872	1062	KRAS	p.G12V	SCLC	2.62056	Cancer Type Non-Specific
724878	1062	KRAS	p.G12C	LUAD	3.04565	Cancer Type Specific
909740	1062	KRAS	p.G12D	COADREAD	1.91204	Cancer Type Non-Specific
907286	1062	KRAS	p.G12V	PAAD	3.01231	Cancer Type Specific
907285	1062	KRAS	p.G12R	PAAD	3.48934	Cancer Type Specific
1298167	1062	NRAS	p.Q61R	THCA	-1.68701	Cancer Type Non-Specific
907280	1062	NRAS	p.Q61R	LAML	1.58014	Cancer Type Non-Specific
907043	1062	NRAS	p.Q61K		3.28994	Cancer Type Non-Specific
724873	1062	KRAS	p.G12A	LUAD	2.93635	Cancer Type Specific
909717	1062	KRAS	p.Q61H		0.774679	Cancer Type Non-Specific
907795	1062	KRAS	p.G12D	COADREAD	4.16097	Cancer Type Non-Specific
909718	1062	KRAS	p.G12V	COADREAD	3.83516	Cancer Type Non-Specific
687820	1062	NRAS	p.Q61R	LUAD	0.586241	Cancer Type Non-Specific
908467	1062	KRAS	p.Q61H		1.96044	Cancer Type Non-Specific
753546	1062	NRAS	p.Q61K	SKCM	2.13585	Cancer Type Specific
910779	1062	KRAS	p.G12C		4.14584	Cancer Type Non-Specific
949170	1062	KRAS	p.G12C	NB	0.397686	Cancer Type Non-Specific
905972	1062	KRAS	p.G12C	LUAD	3.60741	Cancer Type Specific
910702	1062	KRAS	p.G12D	PAAD	-1.31889	Cancer Type Specific
687780	1062	KRAS	p.G12V		0.992098	Cancer Type Non-Specific
905952	1062	KRAS	p.G12D	ALL	2.13393	Cancer Type Non-Specific
909721	1062	KRAS	p.G12D	LUAD	0.287181	Cancer Type Specific
724828	1062	NRAS	p.Q61K	NB	4.11286	Cancer Type Non-Specific
1297446	1062	NRAS	p.Q61H	ALL	3.17728	Cancer Type Non-Specific
907312	1062	NRAS	p.Q61R	BLCA	0.393644	Cancer Type Non-Specific
907275	51	KIT	p.N822K	LAML	2.52632	Cancer Type Non-Specific
907275	292	KIT	p.N822K	LAML	-2.29309	Cancer Type Non-Specific
1659928	292	PDGFRA	p.R822H	COADREAD	1.10385	Cancer Type Non-Specific
907289	292	PDGFRA	p.R822H	COADREAD	2.99195	Cancer Type Non-Specific
907289	199	PDGFRA	p.R822H	COADREAD	3.39762	Cancer Type Non-Specific
907275	5	KIT	p.N822K	LAML	3.50854	Cancer Type Non-Specific
724866	86	KRAS	p.G13C	LUAD	-2.36837	Cancer Type Specific
910948	86	PIK3CA	p.H1047R	BRCA	-0.468523	Cancer Type Non-Specific
949168	86	PIK3CA	p.H1047R		-0.0504553	Cancer Type Non-Specific
909698	86	PIK3CA	p.H1047R	COADREAD	-1.88704	Cancer Type Specific
724859	86	KRAS	p.Q61K	LUAD	-1.82066	Cancer Type Specific
905942	86	KRAS	p.G12C	LUAD	-0.505362	Cancer Type Specific
909256	86	PIK3CA	p.H1047R	BRCA	-3.63023	Cancer Type Non-Specific
924106	86	PIK3CA	p.H1047R	BRCA	-2.83555	Cancer Type Non-Specific
905972	86	KRAS	p.G12C	LUAD	-1.91688	Cancer Type Specific
907053	206	JAK2	p.V617F	LAML	-0.412829	Cancer Type Non-Specific
910566	206	JAK2	p.V617F	LAML	-2.48019	Cancer Type Non-Specific
1479988	1527	KRAS	p.G12D	OV	0.391956	Cancer Type Specific
906801	1527	PIK3CA	p.H1047R	BRCA	1.41213	Cancer Type Non-Specific
687995	1527	PIK3CA	p.H1047R	SCLC	0.279338	Cancer Type Non-Specific
905936	1527	PIK3CA	p.H1047R	COADREAD	0.329906	Cancer Type Specific
1674021	1527	PIK3CA	p.H1047R	COADREAD	0.812436	Cancer Type Specific
722045	1527	KRAS	p.G12C	LUAD	-1.16798	Cancer Type Specific
724866	1527	KRAS	p.G13C	LUAD	-0.419264	Cancer Type Specific
909778	1527	PIK3CA	p.H1047R	BRCA	0.641938	Cancer Type Non-Specific
749709	1527	PIK3CA	p.H1047R	BRCA	0.850796	Cancer Type Non-Specific
1660034	1527	PIK3CA	p.H1047R	COADREAD	1.1344	Cancer Type Specific
910948	1527	PIK3CA	p.H1047R	BRCA	0.53934	Cancer Type Non-Specific
905945	1527	PIK3CA	p.H1047R	BRCA	-1.11862	Cancer Type Non-Specific
949168	1527	PIK3CA	p.H1047R		1.01783	Cancer Type Non-Specific
905969	1527	KRAS	p.G12V	OV	-0.281999	Cancer Type Specific
998189	1527	PIK3CA	p.H1047R	COADREAD	-0.623204	Cancer Type Specific
909698	1527	PIK3CA	p.H1047R	COADREAD	1.08147	Cancer Type Specific
724859	1527	KRAS	p.Q61K	LUAD	2.3433	Cancer Type Specific
1480362	1527	KRAS	p.G12C	OV	1.65791	Cancer Type Specific
1480360	1527	KRAS	p.G12D	OV	-0.854824	Cancer Type Specific
1240222	1527	KRAS	p.G13C	OV	2.19672	Cancer Type Specific
1290730	1527	PIK3CA	p.H1047R	BLCA	-0.45769	Cancer Type Non-Specific
722046	1527	KRAS	p.G12C	LUAD	0.963902	Cancer Type Specific
724868	1527	KRAS	p.G12C	LUAD	-0.346968	Cancer Type Specific
753562	1527	PIK3CA	p.H1047R	HNSC	0.0289867	Cancer Type Non-Specific
905959	1527	PIK3CA	p.H1047R	OV	0.406464	Cancer Type Non-Specific
908122	1527	PIK3CA	p.H1047R	BRCA	0.0669733	Cancer Type Non-Specific
722066	1527	KRAS	p.Q61L	LUAD	2.12213	Cancer Type Specific
909753	1527	KRAS	p.G12V	OV	1.13626	Cancer Type Specific
905942	1527	KRAS	p.G12C	LUAD	1.53602	Cancer Type Specific
1503370	1527	KRAS	p.G12A	LUAD	0.98462	Cancer Type Specific
909256	1527	PIK3CA	p.H1047R	BRCA	-0.294462	Cancer Type Non-Specific
908472	1527	KRAS	p.G12A	LUAD	1.89645	Cancer Type Specific
1240145	1527	KRAS	p.G12C	LUAD	0.199744	Cancer Type Specific
905949	1527	KRAS	p.G12S	LUAD	0.405446	Cancer Type Specific
906837	1527	PIK3CA	p.H1047R	HNSC	1.00641	Cancer Type Non-Specific
724874	1527	KRAS	p.G12V	LUAD	-0.692056	Cancer Type Specific
724878	1527	KRAS	p.G12C	LUAD	-0.184024	Cancer Type Specific
724879	1527	KRAS	p.G12V	LUSC	1.60947	Cancer Type Specific
724873	1527	KRAS	p.G12A	LUAD	1.06108	Cancer Type Specific
908465	1527	KRAS	p.G12C	LUAD	1.44342	Cancer Type Specific
908460	1527	KRAS	p.G12V	LUAD	-0.00172929	Cancer Type Specific
905972	1527	KRAS	p.G12C	LUAD	1.04928	Cancer Type Specific
1240200	1527	PIK3CA	p.H1047R	OV	-0.451709	Cancer Type Non-Specific
909721	1527	KRAS	p.G12D	LUAD	0.618768	Cancer Type Specific
907275	254	KIT	p.N822K	LAML	-4.49638	Cancer Type Non-Specific
906790	1015	KRAS	p.G12D	STAD	0.0914352	Cancer Type Non-Specific
906875	1015	NRAS	p.Q61L	NB	3.58881	Cancer Type Non-Specific
1479988	1015	KRAS	p.G12D	OV	0.896456	Cancer Type Specific
1330933	1015	KRAS	p.G12D		0.78219	Cancer Type Non-Specific
907171	1015	NRAS	p.Q61L	SKCM	-0.760936	Cancer Type Specific
905938	1015	NRAS	p.Q61L	LAML	-1.78656	Cancer Type Non-Specific
724838	1015	KRAS	p.G12C	BLCA	2.0258	Cancer Type Non-Specific
724863	1015	KRAS	p.G12C		5.02907	Cancer Type Non-Specific
1240124	1015	KRAS	p.G12D	COADREAD	2.65883	Cancer Type Non-Specific
909770	1015	KRAS	p.G12D	STAD	1.48993	Cancer Type Non-Specific
909774	1015	NRAS	p.Q61K		-0.314192	Cancer Type Non-Specific
907058	1015	NRAS	p.Q61K	SKCM	0.408987	Cancer Type Specific
907051	1015	KRAS	p.G12D	UCEC	4.03349	Cancer Type Non-Specific
1330942	1015	NRAS	p.Q61H	LAML	0.255476	Cancer Type Non-Specific
1660035	1015	KRAS	p.G12D	COADREAD	3.15782	Cancer Type Non-Specific
1660034	1015	KRAS	p.G12D	COADREAD	1.13093	Cancer Type Non-Specific
910546	1015	KRAS	p.G12R	PAAD	0.0656555	Cancer Type Specific
971777	1015	NRAS	p.Q61K	SKCM	-0.161321	Cancer Type Specific
905969	1015	KRAS	p.G12V	OV	0.174642	Cancer Type Specific
905964	1015	KRAS	p.G12A	MM	0.688409	Cancer Type Non-Specific
905962	1015	KRAS	p.G12V	COADREAD	-0.10387	Cancer Type Non-Specific
998189	1015	KRAS	p.G12D	COADREAD	1.91553	Cancer Type Non-Specific
724859	1015	KRAS	p.Q61K	LUAD	1.55377	Cancer Type Specific
724855	1015	KRAS	p.G12V		0.258662	Cancer Type Non-Specific
909735	1015	KRAS	p.G12V	UCEC	2.73422	Cancer Type Non-Specific
753595	1015	KRAS	p.G12V	PAAD	3.15261	Cancer Type Specific
909736	1015	NRAS	p.Q61K	LIHC	0.933839	Cancer Type Non-Specific
1298475	1015	KRAS	p.G12D	PAAD	-0.610211	Cancer Type Specific
1298141	1015	KRAS	p.Q61H	PAAD	0.462455	Cancer Type Specific
753581	1015	NRAS	p.Q61K	SKCM	1.92547	Cancer Type Specific
1298476	1015	KRAS	p.G12D	PAAD	0.948138	Cancer Type Specific
907064	1015	NRAS	p.Q61K		0.594337	Cancer Type Non-Specific
907065	1015	NRAS	p.Q61R	BLCA	3.22916	Cancer Type Non-Specific
1290797	1015	KRAS	p.G12V	PAAD	2.21707	Cancer Type Specific
907069	1015	KRAS	p.G12D		1.75318	Cancer Type Non-Specific
1503365	1015	KRAS	p.G12A	ESCA	0.414961	Cancer Type Non-Specific
925347	1015	KRAS	p.G12D	PAAD	2.77139	Cancer Type Specific
724839	1015	KRAS	p.G12C	CESC	2.61618	Cancer Type Non-Specific
1480362	1015	KRAS	p.G12C	OV	1.80368	Cancer Type Specific
1480360	1015	KRAS	p.G12D	OV	1.44523	Cancer Type Specific
1298534	1015	KRAS	p.G12V		4.33089	Cancer Type Non-Specific
1298533	1015	KRAS	p.G12D	PAAD	2.14659	Cancer Type Specific
1298539	1015	KRAS	p.G12V		-0.00180695	Cancer Type Non-Specific
909248	1015	NRAS	p.Q61R	MB	0.276466	Cancer Type Non-Specific
910932	1015	NRAS	p.Q61L	SKCM	1.22472	Cancer Type Specific
1298216	1015	KRAS	p.G12D	PAAD	2.57522	Cancer Type Specific
1298218	1015	KRAS	p.G12R	PAAD	1.12835	Cancer Type Specific
1298219	1015	KRAS	p.G12V		2.84211	Cancer Type Non-Specific
1327769	1015	NRAS	p.Q61K	DLBC	1.61618	Cancer Type Non-Specific
1327766	1015	NRAS	p.Q61K	MM	0.70227	Cancer Type Non-Specific
906853	1015	KRAS	p.G12D		1.46731	Cancer Type Non-Specific
1240222	1015	KRAS	p.G13C	OV	1.72551	Cancer Type Specific
1240223	1015	NRAS	p.Q61R	THCA	-0.612523	Cancer Type Non-Specific
1290455	1015	NRAS	p.Q61L	LAML	0.229385	Cancer Type Non-Specific
906828	1015	KRAS	p.G12R	THCA	0.197076	Cancer Type Non-Specific
906821	1015	KRAS	p.G12V	PAAD	2.34001	Cancer Type Specific
722046	1015	KRAS	p.G12C	LUAD	1.72781	Cancer Type Specific
1330950	1015	NRAS	p.Q61L	MM	1.53942	Cancer Type Non-Specific
1290907	1015	KRAS	p.G12V	COADREAD	0.660536	Cancer Type Non-Specific
910907	1015	KRAS	p.G12D	PAAD	2.32626	Cancer Type Specific
724868	1015	KRAS	p.G12C	LUAD	1.56781	Cancer Type Specific
753563	1015	NRAS	p.Q61K	MM	2.42818	Cancer Type Non-Specific
906820	1015	NRAS	p.Q61K	NB	-3.09052	Cancer Type Non-Specific
753579	1015	NRAS	p.Q61K	SKCM	-0.278676	Cancer Type Specific
910689	1015	KRAS	p.G12D	COADREAD	1.35195	Cancer Type Non-Specific
909726	1015	NRAS	p.Q61K	SKCM	1.79009	Cancer Type Specific
908125	1015	NRAS	p.Q61L	SKCM	1.50931	Cancer Type Specific
1299062	1015	NRAS	p.Q61R	SCLC	0.993833	Cancer Type Non-Specific
1659818	1015	KRAS	p.G12A	MM	1.43517	Cancer Type Non-Specific
924239	1015	NRAS	p.Q61H	MM	2.65031	Cancer Type Non-Specific
722066	1015	KRAS	p.Q61L	LUAD	3.31183	Cancer Type Specific
909757	1015	KRAS	p.Q61L	COADREAD	2.69187	Cancer Type Non-Specific
909753	1015	KRAS	p.G12V	OV	1.32934	Cancer Type Specific
910851	1015	KRAS	p.G12D		1.24191	Cancer Type Non-Specific
910850	1015	NRAS	p.Q61L	LIHC	3.1293	Cancer Type Non-Specific
905943	1015	KRAS	p.Q61H		0.430707	Cancer Type Non-Specific
1290769	1015	KRAS	p.Q61H	COADREAD	-0.400371	Cancer Type Non-Specific
1330984	1015	NRAS	p.Q61K	DLBC	0.885562	Cancer Type Non-Specific
1503370	1015	KRAS	p.G12A	LUAD	2.27302	Cancer Type Specific
1298526	1015	KRAS	p.G12V	PAAD	1.00141	Cancer Type Specific
1298356	1015	KRAS	p.G12V		2.61803	Cancer Type Non-Specific
1298352	1015	NRAS	p.Q61K		5.09844	Cancer Type Non-Specific
910926	1015	NRAS	p.Q61L	BLCA	1.1836	Cancer Type Non-Specific
907300	1015	NRAS	p.Q61H	LAML	1.12559	Cancer Type Non-Specific
753624	1015	KRAS	p.G12V	PAAD	1.95483	Cancer Type Specific
1240219	1015	KRAS	p.G12D	PAAD	0.691072	Cancer Type Specific
1240218	1015	KRAS	p.G12D	PAAD	0.747871	Cancer Type Specific
724834	1015	NRAS	p.Q61K	LUAD	1.34616	Cancer Type Non-Specific
909904	1015	KRAS	p.G12V	PAAD	4.39297	Cancer Type Specific
1290722	1015	NRAS	p.Q61R	THCA	0.77337	Cancer Type Non-Specific
1327775	1015	KRAS	p.G12D	MM	1.61142	Cancer Type Non-Specific
946361	1015	KRAS	p.G12V		0.524856	Cancer Type Non-Specific
724874	1015	KRAS	p.G12V	LUAD	0.278226	Cancer Type Specific
905955	1015	NRAS	p.Q61R	SKCM	-0.470912	Cancer Type Specific
925343	1015	NRAS	p.Q61K		1.22075	Cancer Type Non-Specific
753574	1015	KRAS	p.G12C	ESCA	0.63115	Cancer Type Non-Specific
925346	1015	KRAS	p.G12V	PAAD	1.13263	Cancer Type Specific
1240145	1015	KRAS	p.G12C	LUAD	0.730005	Cancer Type Specific
1240143	1015	NRAS	p.Q61K	LUSC	-0.835636	Cancer Type Non-Specific
905942	1015	KRAS	p.G12C	LUAD	1.28382	Cancer Type Specific
905949	1015	KRAS	p.G12S	LUAD	0.79074	Cancer Type Specific
910692	1015	KRAS	p.G12V	SCLC	4.02939	Cancer Type Non-Specific
909263	1015	KRAS	p.G12V	COADREAD	0.228865	Cancer Type Non-Specific
724870	1015	KRAS	p.G12C	PAAD	-0.0991356	Cancer Type Specific
724872	1015	KRAS	p.G12V	SCLC	3.86817	Cancer Type Non-Specific
910915	1015	KRAS	p.G12V	PAAD	1.95963	Cancer Type Specific
724878	1015	KRAS	p.G12C	LUAD	2.7863	Cancer Type Specific
722058	1015	KRAS	p.G13C	LUAD	2.4157	Cancer Type Specific
909740	1015	KRAS	p.G12D	COADREAD	1.9438	Cancer Type Non-Specific
907286	1015	KRAS	p.G12V	PAAD	-0.0290756	Cancer Type Specific
907285	1015	KRAS	p.G12R	PAAD	0.501984	Cancer Type Specific
1298167	1015	NRAS	p.Q61R	THCA	-0.480812	Cancer Type Non-Specific
907280	1015	NRAS	p.Q61R	LAML	-2.29565	Cancer Type Non-Specific
907043	1015	NRAS	p.Q61K		1.39813	Cancer Type Non-Specific
724873	1015	KRAS	p.G12A	LUAD	1.22257	Cancer Type Specific
909717	1015	KRAS	p.Q61H		2.27059	Cancer Type Non-Specific
907795	1015	KRAS	p.G12D	COADREAD	0.13934	Cancer Type Non-Specific
907792	1015	KRAS	p.G12S	COADREAD	3.15198	Cancer Type Non-Specific
687820	1015	NRAS	p.Q61R	LUAD	2.26876	Cancer Type Non-Specific
908467	1015	KRAS	p.Q61H		2.54754	Cancer Type Non-Specific
908465	1015	KRAS	p.G12C	LUAD	1.04298	Cancer Type Specific
908460	1015	KRAS	p.G12V	LUAD	3.13167	Cancer Type Specific
753546	1015	NRAS	p.Q61K	SKCM	-1.27869	Cancer Type Specific
949170	1015	KRAS	p.G12C	NB	1.23067	Cancer Type Non-Specific
905972	1015	KRAS	p.G12C	LUAD	1.85683	Cancer Type Specific
910702	1015	KRAS	p.G12D	PAAD	1.67007	Cancer Type Specific
687780	1015	KRAS	p.G12V		2.09748	Cancer Type Non-Specific
905952	1015	KRAS	p.G12D	ALL	1.35495	Cancer Type Non-Specific
1240201	1015	KRAS	p.G12V	PAAD	1.92741	Cancer Type Specific
724828	1015	NRAS	p.Q61K	NB	0.471499	Cancer Type Non-Specific
1297446	1015	NRAS	p.Q61H	ALL	1.64205	Cancer Type Non-Specific
907312	1015	NRAS	p.Q61R	BLCA	1.11984	Cancer Type Non-Specific
906801	1016	PIK3CA	p.H1047R	BRCA	-1.87176	Cancer Type Non-Specific
687995	1016	PIK3CA	p.H1047R	SCLC	-1.36834	Cancer Type Non-Specific
905936	1016	PIK3CA	p.H1047R	COADREAD	-0.595839	Cancer Type Specific
1674021	1016	PIK3CA	p.H1047R	COADREAD	-1.26717	Cancer Type Specific
909778	1016	PIK3CA	p.H1047R	BRCA	0.182921	Cancer Type Non-Specific
905945	1016	PIK3CA	p.H1047R	BRCA	-2.71689	Cancer Type Non-Specific
749709	1016	PIK3CA	p.H1047R	BRCA	-0.549646	Cancer Type Non-Specific
1660034	1016	PIK3CA	p.H1047R	COADREAD	-2.74202	Cancer Type Specific
910948	1016	PIK3CA	p.H1047R	BRCA	-2.35667	Cancer Type Non-Specific
949168	1016	PIK3CA	p.H1047R		-0.768125	Cancer Type Non-Specific
998189	1016	PIK3CA	p.H1047R	COADREAD	-0.541326	Cancer Type Specific
909698	1016	PIK3CA	p.H1047R	COADREAD	-2.7308	Cancer Type Specific
1290730	1016	PIK3CA	p.H1047R	BLCA	-5.00412	Cancer Type Non-Specific
753562	1016	PIK3CA	p.H1047R	HNSC	-2.71367	Cancer Type Non-Specific
905959	1016	PIK3CA	p.H1047R	OV	-2.94534	Cancer Type Non-Specific
908122	1016	PIK3CA	p.H1047R	BRCA	-0.703485	Cancer Type Non-Specific
909256	1016	PIK3CA	p.H1047R	BRCA	-2.26755	Cancer Type Non-Specific
906837	1016	PIK3CA	p.H1047R	HNSC	-2.12427	Cancer Type Non-Specific
753541	1016	PIK3CA	p.H1047R	HNSC	-4.9996	Cancer Type Non-Specific
1240200	1016	PIK3CA	p.H1047R	OV	0.561403	Cancer Type Non-Specific
924244	1010	EGFR	p.T790M	LUAD	1.832	Cancer Type Specific
907320	1010	EGFR	p.S768I	ESCA	-1.33036	Cancer Type Non-Specific
1247873	1010	EGFR	p.L858R	LUAD	-4.42274	Cancer Type Specific
1479988	303	KRAS	p.G12D	OV	2.12761	Cancer Type Specific
906801	303	PIK3CA	p.H1047R	BRCA	2.89704	Cancer Type Non-Specific
687995	303	PIK3CA	p.H1047R	SCLC	-1.52045	Cancer Type Non-Specific
905936	303	PIK3CA	p.H1047R	COADREAD	1.96673	Cancer Type Specific
1674021	303	PIK3CA	p.H1047R	COADREAD	2.92988	Cancer Type Specific
722045	303	KRAS	p.G12C	LUAD	2.31	Cancer Type Specific
724866	303	KRAS	p.G13C	LUAD	6.05723	Cancer Type Specific
724868	303	KRAS	p.G12C	LUAD	3.24944	Cancer Type Specific
909778	303	PIK3CA	p.H1047R	BRCA	2.52893	Cancer Type Non-Specific
924106	303	PIK3CA	p.H1047R	BRCA	1.59852	Cancer Type Non-Specific
749709	303	PIK3CA	p.H1047R	BRCA	3.41808	Cancer Type Non-Specific
1660034	303	PIK3CA	p.H1047R	COADREAD	0.57752	Cancer Type Specific
910948	303	PIK3CA	p.H1047R	BRCA	3.15391	Cancer Type Non-Specific
905945	303	PIK3CA	p.H1047R	BRCA	-0.245221	Cancer Type Non-Specific
949168	303	PIK3CA	p.H1047R		5.05242	Cancer Type Non-Specific
905969	303	KRAS	p.G12V	OV	3.03391	Cancer Type Specific
998189	303	PIK3CA	p.H1047R	COADREAD	3.52915	Cancer Type Specific
909698	303	PIK3CA	p.H1047R	COADREAD	1.83489	Cancer Type Specific
724859	303	KRAS	p.Q61K	LUAD	2.90344	Cancer Type Specific
1480362	303	KRAS	p.G12C	OV	2.87501	Cancer Type Specific
1480360	303	KRAS	p.G12D	OV	1.10593	Cancer Type Specific
1240222	303	KRAS	p.G13C	OV	5.14139	Cancer Type Specific
1290730	303	PIK3CA	p.H1047R	BLCA	1.45655	Cancer Type Non-Specific
722046	303	KRAS	p.G12C	LUAD	3.81313	Cancer Type Specific
753562	303	PIK3CA	p.H1047R	HNSC	2.74298	Cancer Type Non-Specific
905959	303	PIK3CA	p.H1047R	OV	2.17133	Cancer Type Non-Specific
908122	303	PIK3CA	p.H1047R	BRCA	0.925279	Cancer Type Non-Specific
722066	303	KRAS	p.Q61L	LUAD	3.13336	Cancer Type Specific
909753	303	KRAS	p.G12V	OV	3.04604	Cancer Type Specific
905942	303	KRAS	p.G12C	LUAD	4.09784	Cancer Type Specific
1503370	303	KRAS	p.G12A	LUAD	1.23881	Cancer Type Specific
909256	303	PIK3CA	p.H1047R	BRCA	0.84691	Cancer Type Non-Specific
724874	303	KRAS	p.G12V	LUAD	6.67542	Cancer Type Specific
908472	303	KRAS	p.G12A	LUAD	4.35491	Cancer Type Specific
1240145	303	KRAS	p.G12C	LUAD	2.15336	Cancer Type Specific
906837	303	PIK3CA	p.H1047R	HNSC	3.72232	Cancer Type Non-Specific
724878	303	KRAS	p.G12C	LUAD	6.2535	Cancer Type Specific
724879	303	KRAS	p.G12V	LUSC	4.16251	Cancer Type Specific
722058	303	KRAS	p.G13C	LUAD	3.29806	Cancer Type Specific
724873	303	KRAS	p.G12A	LUAD	4.13032	Cancer Type Specific
908465	303	KRAS	p.G12C	LUAD	2.46855	Cancer Type Specific
908460	303	KRAS	p.G12V	LUAD	5.56467	Cancer Type Specific
753541	303	PIK3CA	p.H1047R	HNSC	1.30705	Cancer Type Non-Specific
905972	303	KRAS	p.G12C	LUAD	3.10396	Cancer Type Specific
1240200	303	PIK3CA	p.H1047R	OV	0.361774	Cancer Type Non-Specific
909721	303	KRAS	p.G12D	LUAD	3.96675	Cancer Type Specific
906790	1014	KRAS	p.G12D	STAD	-1.93934	Cancer Type Non-Specific
906875	1014	NRAS	p.Q61L	NB	3.64477	Cancer Type Non-Specific
1479988	1014	KRAS	p.G12D	OV	-0.35326	Cancer Type Specific
1330933	1014	KRAS	p.G12D		-0.192173	Cancer Type Non-Specific
907171	1014	NRAS	p.Q61L	SKCM	-3.00466	Cancer Type Specific
905938	1014	NRAS	p.Q61L	LAML	-2.38463	Cancer Type Non-Specific
905943	1014	KRAS	p.Q61H		0.845794	Cancer Type Non-Specific
724863	1014	KRAS	p.G12C		4.93433	Cancer Type Non-Specific
722045	1014	KRAS	p.G12C	LUAD	1.6438	Cancer Type Specific
724866	1014	KRAS	p.G13C	LUAD	2.37556	Cancer Type Specific
1240124	1014	KRAS	p.G12D	COADREAD	-0.0822352	Cancer Type Non-Specific
909770	1014	KRAS	p.G12D	STAD	0.00042307	Cancer Type Non-Specific
909774	1014	NRAS	p.Q61K		-0.738349	Cancer Type Non-Specific
907051	1014	KRAS	p.G12D	UCEC	2.57572	Cancer Type Non-Specific
1330942	1014	NRAS	p.Q61H	LAML	-0.729756	Cancer Type Non-Specific
1660035	1014	KRAS	p.G12D	COADREAD	2.30139	Cancer Type Non-Specific
1660034	1014	KRAS	p.G12D	COADREAD	0.137432	Cancer Type Non-Specific
910546	1014	KRAS	p.G12R	PAAD	-1.53905	Cancer Type Specific
971777	1014	NRAS	p.Q61K	SKCM	-0.7453	Cancer Type Specific
905969	1014	KRAS	p.G12V	OV	-1.29647	Cancer Type Specific
905964	1014	KRAS	p.G12A	MM	0.711964	Cancer Type Non-Specific
1298476	1014	KRAS	p.G12D	PAAD	0.575298	Cancer Type Specific
905962	1014	KRAS	p.G12V	COADREAD	-0.802267	Cancer Type Non-Specific
998189	1014	KRAS	p.G12D	COADREAD	-0.136661	Cancer Type Non-Specific
724859	1014	KRAS	p.Q61K	LUAD	1.3628	Cancer Type Specific
724855	1014	KRAS	p.G12V		2.26665	Cancer Type Non-Specific
909735	1014	KRAS	p.G12V	UCEC	3.45923	Cancer Type Non-Specific
753595	1014	KRAS	p.G12V	PAAD	-0.0514365	Cancer Type Specific
909736	1014	NRAS	p.Q61K	LIHC	-0.545152	Cancer Type Non-Specific
1298475	1014	KRAS	p.G12D	PAAD	-1.34223	Cancer Type Specific
1298141	1014	KRAS	p.Q61H	PAAD	0.110699	Cancer Type Specific
753581	1014	NRAS	p.Q61K	SKCM	0.456369	Cancer Type Specific
907064	1014	NRAS	p.Q61K		-0.614754	Cancer Type Non-Specific
907065	1014	NRAS	p.Q61R	BLCA	2.76732	Cancer Type Non-Specific
1290797	1014	KRAS	p.G12V	PAAD	0.918566	Cancer Type Specific
907069	1014	KRAS	p.G12D		-0.240223	Cancer Type Non-Specific
1503365	1014	KRAS	p.G12A	ESCA	-0.78218	Cancer Type Non-Specific
724839	1014	KRAS	p.G12C	CESC	0.301741	Cancer Type Non-Specific
1480362	1014	KRAS	p.G12C	OV	0.520571	Cancer Type Specific
1480360	1014	KRAS	p.G12D	OV	1.70916	Cancer Type Specific
1298534	1014	KRAS	p.G12V		1.59897	Cancer Type Non-Specific
1298533	1014	KRAS	p.G12D	PAAD	0.353703	Cancer Type Specific
1298539	1014	KRAS	p.G12V		0.715293	Cancer Type Non-Specific
909248	1014	NRAS	p.Q61R	MB	-0.600636	Cancer Type Non-Specific
910932	1014	NRAS	p.Q61L	SKCM	-0.3893	Cancer Type Specific
1298216	1014	KRAS	p.G12D	PAAD	2.69956	Cancer Type Specific
1298218	1014	KRAS	p.G12R	PAAD	-1.58151	Cancer Type Specific
1298219	1014	KRAS	p.G12V		0.613304	Cancer Type Non-Specific
1327769	1014	NRAS	p.Q61K	DLBC	0.540384	Cancer Type Non-Specific
1327766	1014	NRAS	p.Q61K	MM	0.171687	Cancer Type Non-Specific
906853	1014	KRAS	p.G12D		0.0453417	Cancer Type Non-Specific
1240222	1014	KRAS	p.G13C	OV	0.883521	Cancer Type Specific
1240223	1014	NRAS	p.Q61R	THCA	-2.24925	Cancer Type Non-Specific
1290455	1014	NRAS	p.Q61L	LAML	-2.0381	Cancer Type Non-Specific
906828	1014	KRAS	p.G12R	THCA	-0.330437	Cancer Type Non-Specific
906821	1014	KRAS	p.G12V	PAAD	1.47208	Cancer Type Specific
1330950	1014	NRAS	p.Q61L	MM	0.566164	Cancer Type Non-Specific
1290907	1014	KRAS	p.G12V	COADREAD	-2.18222	Cancer Type Non-Specific
724868	1014	KRAS	p.G12C	LUAD	0.363063	Cancer Type Specific
753563	1014	NRAS	p.Q61K	MM	1.71784	Cancer Type Non-Specific
906820	1014	NRAS	p.Q61K	NB	-3.81179	Cancer Type Non-Specific
753579	1014	NRAS	p.Q61K	SKCM	-2.20323	Cancer Type Specific
910689	1014	KRAS	p.G12D	COADREAD	0.347676	Cancer Type Non-Specific
905955	1014	NRAS	p.Q61R	SKCM	-1.23508	Cancer Type Specific
908125	1014	NRAS	p.Q61L	SKCM	-0.723722	Cancer Type Specific
1299062	1014	NRAS	p.Q61R	SCLC	0.725128	Cancer Type Non-Specific
1659818	1014	KRAS	p.G12A	MM	0.67946	Cancer Type Non-Specific
924239	1014	NRAS	p.Q61H	MM	2.14445	Cancer Type Non-Specific
722066	1014	KRAS	p.Q61L	LUAD	1.21865	Cancer Type Specific
909757	1014	KRAS	p.Q61L	COADREAD	1.70607	Cancer Type Non-Specific
909753	1014	KRAS	p.G12V	OV	-1.0997	Cancer Type Specific
910851	1014	KRAS	p.G12D		1.2801	Cancer Type Non-Specific
910850	1014	NRAS	p.Q61L	LIHC	1.70705	Cancer Type Non-Specific
905942	1014	KRAS	p.G12C	LUAD	1.68325	Cancer Type Specific
1290769	1014	KRAS	p.Q61H	COADREAD	-1.10201	Cancer Type Non-Specific
1330984	1014	NRAS	p.Q61K	DLBC	1.2259	Cancer Type Non-Specific
1503370	1014	KRAS	p.G12A	LUAD	-0.213188	Cancer Type Specific
1298526	1014	KRAS	p.G12V	PAAD	-0.278603	Cancer Type Specific
1298356	1014	KRAS	p.G12V		1.74732	Cancer Type Non-Specific
1298352	1014	NRAS	p.Q61K		4.4053	Cancer Type Non-Specific
910926	1014	NRAS	p.Q61L	BLCA	-0.157605	Cancer Type Non-Specific
907300	1014	NRAS	p.Q61H	LAML	-1.56626	Cancer Type Non-Specific
753624	1014	KRAS	p.G12V	PAAD	1.35451	Cancer Type Specific
1240212	1014	KRAS	p.G12D	CESC	0.674438	Cancer Type Non-Specific
1240219	1014	KRAS	p.G12D	PAAD	-1.48963	Cancer Type Specific
910915	1014	KRAS	p.G12V	PAAD	1.10874	Cancer Type Specific
724834	1014	NRAS	p.Q61K	LUAD	0.60104	Cancer Type Non-Specific
909904	1014	KRAS	p.G12V	PAAD	2.01231	Cancer Type Specific
1290722	1014	NRAS	p.Q61R	THCA	-0.228876	Cancer Type Non-Specific
1327775	1014	KRAS	p.G12D	MM	1.15946	Cancer Type Non-Specific
946361	1014	KRAS	p.G12V		-1.19198	Cancer Type Non-Specific
925343	1014	NRAS	p.Q61K		-0.504735	Cancer Type Non-Specific
724870	1014	KRAS	p.G12C	PAAD	-1.10186	Cancer Type Specific
753574	1014	KRAS	p.G12C	ESCA	0.241605	Cancer Type Non-Specific
925346	1014	KRAS	p.G12V	PAAD	-0.283802	Cancer Type Specific
1240145	1014	KRAS	p.G12C	LUAD	-1.33638	Cancer Type Specific
1240143	1014	NRAS	p.Q61K	LUSC	-1.13265	Cancer Type Non-Specific
905949	1014	KRAS	p.G12S	LUAD	-1.61512	Cancer Type Specific
910692	1014	KRAS	p.G12V	SCLC	1.57222	Cancer Type Non-Specific
909263	1014	KRAS	p.G12V	COADREAD	-1.74043	Cancer Type Non-Specific
724874	1014	KRAS	p.G12V	LUAD	-0.853345	Cancer Type Specific
724872	1014	KRAS	p.G12V	SCLC	3.98541	Cancer Type Non-Specific
724878	1014	KRAS	p.G12C	LUAD	2.69111	Cancer Type Specific
724879	1014	KRAS	p.G12V	LUSC	4.654	Cancer Type Specific
909740	1014	KRAS	p.G12D	COADREAD	1.55408	Cancer Type Non-Specific
907286	1014	KRAS	p.G12V	PAAD	-1.13196	Cancer Type Specific
907285	1014	KRAS	p.G12R	PAAD	-0.496645	Cancer Type Specific
1298167	1014	NRAS	p.Q61R	THCA	-3.18143	Cancer Type Non-Specific
907280	1014	NRAS	p.Q61R	LAML	-3.42096	Cancer Type Non-Specific
907043	1014	NRAS	p.Q61K		1.21005	Cancer Type Non-Specific
724873	1014	KRAS	p.G12A	LUAD	0.0588453	Cancer Type Specific
909717	1014	KRAS	p.Q61H		-1.81345	Cancer Type Non-Specific
907795	1014	KRAS	p.G12D	COADREAD	-1.6299	Cancer Type Non-Specific
909718	1014	KRAS	p.G12V	COADREAD	-1.49117	Cancer Type Non-Specific
687820	1014	NRAS	p.Q61R	LUAD	-0.571726	Cancer Type Non-Specific
908467	1014	KRAS	p.Q61H		1.87956	Cancer Type Non-Specific
908465	1014	KRAS	p.G12C	LUAD	1.87355	Cancer Type Specific
753546	1014	NRAS	p.Q61K	SKCM	-2.26907	Cancer Type Specific
910779	1014	KRAS	p.G12C		1.37113	Cancer Type Non-Specific
949170	1014	KRAS	p.G12C	NB	-0.677214	Cancer Type Non-Specific
905972	1014	KRAS	p.G12C	LUAD	0.125792	Cancer Type Specific
910702	1014	KRAS	p.G12D	PAAD	0.0529254	Cancer Type Specific
687780	1014	KRAS	p.G12V		0.977776	Cancer Type Non-Specific
905952	1014	KRAS	p.G12D	ALL	2.34021	Cancer Type Non-Specific
909721	1014	KRAS	p.G12D	LUAD	2.10184	Cancer Type Specific
724828	1014	NRAS	p.Q61K	NB	-0.43872	Cancer Type Non-Specific
1297446	1014	NRAS	p.Q61H	ALL	0.28226	Cancer Type Non-Specific
907312	1014	NRAS	p.Q61R	BLCA	-2.14714	Cancer Type Non-Specific
1659928	249	PDGFRA	p.R822H	COADREAD	1.77203	Cancer Type Non-Specific
907289	249	PDGFRA	p.R822H	COADREAD	3.38817	Cancer Type Non-Specific
907053	32	JAK2	p.V617F	LAML	0.584492	Cancer Type Non-Specific
907275	32	KIT	p.N822K	LAML	3.11122	Cancer Type Non-Specific
910566	32	JAK2	p.V617F	LAML	-0.0551132	Cancer Type Non-Specific
907275	30	KIT	p.N822K	LAML	3.65172	Cancer Type Non-Specific
907275	34	KIT	p.N822K	LAML	3.12602	Cancer Type Non-Specific
907275	153	KIT	p.N822K	LAML	-2.85409	Cancer Type Non-Specific
907289	153	PDGFRA	p.R822H	COADREAD	-0.913458	Cancer Type Non-Specific
906801	171	PIK3CA	p.H1047R	BRCA	1.31356	Cancer Type Non-Specific
687995	171	PIK3CA	p.H1047R	SCLC	1.96499	Cancer Type Non-Specific
905945	171	PIK3CA	p.H1047R	BRCA	-0.267296	Cancer Type Non-Specific
905936	171	PIK3CA	p.H1047R	COADREAD	0.990438	Cancer Type Specific
722045	171	KRAS	p.G12C	LUAD	0.75311	Cancer Type Specific
724866	171	KRAS	p.G13C	LUAD	2.45504	Cancer Type Specific
724868	171	KRAS	p.G12C	LUAD	2.16477	Cancer Type Specific
909778	171	PIK3CA	p.H1047R	BRCA	1.33215	Cancer Type Non-Specific
924106	171	PIK3CA	p.H1047R	BRCA	1.55096	Cancer Type Non-Specific
749709	171	PIK3CA	p.H1047R	BRCA	1.92613	Cancer Type Non-Specific
910948	171	PIK3CA	p.H1047R	BRCA	3.5938	Cancer Type Non-Specific
949168	171	PIK3CA	p.H1047R		3.13632	Cancer Type Non-Specific
905969	171	KRAS	p.G12V	OV	3.11803	Cancer Type Specific
998189	171	PIK3CA	p.H1047R	COADREAD	1.22916	Cancer Type Specific
909698	171	PIK3CA	p.H1047R	COADREAD	1.79034	Cancer Type Specific
724859	171	KRAS	p.Q61K	LUAD	2.7093	Cancer Type Specific
1240222	171	KRAS	p.G13C	OV	3.66014	Cancer Type Specific
1290730	171	PIK3CA	p.H1047R	BLCA	1.19617	Cancer Type Non-Specific
722046	171	KRAS	p.G12C	LUAD	1.73074	Cancer Type Specific
753562	171	PIK3CA	p.H1047R	HNSC	1.60971	Cancer Type Non-Specific
905959	171	PIK3CA	p.H1047R	OV	2.2648	Cancer Type Non-Specific
908122	171	PIK3CA	p.H1047R	BRCA	1.55329	Cancer Type Non-Specific
722066	171	KRAS	p.Q61L	LUAD	3.19111	Cancer Type Specific
909753	171	KRAS	p.G12V	OV	1.92535	Cancer Type Specific
905942	171	KRAS	p.G12C	LUAD	3.544	Cancer Type Specific
909256	171	PIK3CA	p.H1047R	BRCA	0.394084	Cancer Type Non-Specific
724874	171	KRAS	p.G12V	LUAD	4.45822	Cancer Type Specific
908472	171	KRAS	p.G12A	LUAD	3.59021	Cancer Type Specific
1240145	171	KRAS	p.G12C	LUAD	1.22743	Cancer Type Specific
906837	171	PIK3CA	p.H1047R	HNSC	1.00741	Cancer Type Non-Specific
724878	171	KRAS	p.G12C	LUAD	3.8383	Cancer Type Specific
724879	171	KRAS	p.G12V	LUSC	2.05585	Cancer Type Specific
722058	171	KRAS	p.G13C	LUAD	1.81404	Cancer Type Specific
724873	171	KRAS	p.G12A	LUAD	1.22074	Cancer Type Specific
908465	171	KRAS	p.G12C	LUAD	1.34292	Cancer Type Specific
908460	171	KRAS	p.G12V	LUAD	3.60048	Cancer Type Specific
753541	171	PIK3CA	p.H1047R	HNSC	1.06661	Cancer Type Non-Specific
905972	171	KRAS	p.G12C	LUAD	2.24796	Cancer Type Specific
1240200	171	PIK3CA	p.H1047R	OV	2.10189	Cancer Type Non-Specific
909721	171	KRAS	p.G12D	LUAD	2.88152	Cancer Type Specific
924244	1032	EGFR	p.T790M	LUAD	-0.983132	Cancer Type Specific
907320	1032	EGFR	p.S768I	ESCA	-2.24045	Cancer Type Non-Specific
1247873	1032	EGFR	p.L858R	LUAD	-5.41769	Cancer Type Specific
906793	1036	BRAF	p.V600E	SKCM	-1.39682	Cancer Type Specific
906795	1036	BRAF	p.V600E	THCA	1.13722	Cancer Type Non-Specific
910903	1036	BRAF	p.V600E	SKCM	2.28656	Cancer Type Specific
1240153	1036	BRAF	p.V600E	SKCM	-1.96159	Cancer Type Specific
1240154	1036	BRAF	p.V600E	THCA	1.7822	Cancer Type Non-Specific
1674021	1036	BRAF	p.V600E	COADREAD	2.92013	Cancer Type Non-Specific
905939	1036	BRAF	p.V600E	COADREAD	0.977553	Cancer Type Non-Specific
1240128	1036	BRAF	p.V600E		1.90312	Cancer Type Non-Specific
1240125	1036	BRAF	p.V600E	SKCM	1.85702	Cancer Type Specific
1299078	1036	BRAF	p.V600E	SKCM	1.70355	Cancer Type Specific
909724	1036	BRAF	p.V600E	SKCM	1.57919	Cancer Type Specific
906830	1036	BRAF	p.V600E	SKCM	-1.13241	Cancer Type Specific
924104	1036	BRAF	p.V600E	THCA	1.75535	Cancer Type Non-Specific
906835	1036	BRAF	p.V600E	GBM	1.71315	Cancer Type Non-Specific
905961	1036	BRAF	p.V600E	COADREAD	-1.62448	Cancer Type Non-Specific
909698	1036	BRAF	p.V600E	COADREAD	3.82709	Cancer Type Non-Specific
907172	1036	BRAF	p.V600E	SKCM	2.44336	Cancer Type Specific
753596	1036	BRAF	p.V600E	SKCM	2.04436	Cancer Type Specific
1298144	1036	BRAF	p.V600E	SKCM	1.23828	Cancer Type Specific
907067	1036	BRAF	p.V600E	SKCM	-0.178628	Cancer Type Specific
906865	1036	BRAF	p.V600E	SKCM	1.14074	Cancer Type Specific
1290771	1036	BRAF	p.V600E	COADREAD	1.7929	Cancer Type Non-Specific
907169	1036	BRAF	p.V600E	SKCM	2.40031	Cancer Type Specific
908449	1036	BRAF	p.V600E	LGG	2.67609	Cancer Type Non-Specific
910933	1036	BRAF	p.V600E	GBM	3.81656	Cancer Type Non-Specific
1287706	1036	BRAF	p.V600E	SKCM	-1.86611	Cancer Type Specific
909713	1036	BRAF	p.V600E	SKCM	-0.586673	Cancer Type Specific
1240173	1036	BRAF	p.V600E	COADREAD	2.404	Cancer Type Non-Specific
907794	1036	BRAF	p.V600E	COADREAD	2.03397	Cancer Type Non-Specific
909723	1036	BRAF	p.V600E	SKCM	-0.0418187	Cancer Type Specific
905954	1036	BRAF	p.V600E	SKCM	-0.231258	Cancer Type Specific
905956	1036	BRAF	p.V600E	SKCM	0.68838	Cancer Type Specific
908124	1036	BRAF	p.V600E	SKCM	-0.887653	Cancer Type Specific
924238	1036	BRAF	p.V600E	THCA	-0.0372881	Cancer Type Non-Specific
909759	1036	BRAF	p.V600E		1.58303	Cancer Type Non-Specific
905976	1036	BRAF	p.V600E	SKCM	4.39846	Cancer Type Specific
905977	1036	BRAF	p.V600E	SKCM	0.457979	Cancer Type Specific
910921	1036	BRAF	p.V600E	SKCM	-0.465503	Cancer Type Specific
909784	1036	BRAF	p.V600E	SKCM	-0.108406	Cancer Type Specific
906696	1036	BRAF	p.V600E	THCA	-0.322751	Cancer Type Non-Specific
909719	1036	BRAF	p.V600E	LIHC	2.24539	Cancer Type Non-Specific
925339	1036	BRAF	p.V600E	SKCM	-0.354072	Cancer Type Specific
906813	1036	BRAF	p.V600E	SKCM	4.78106	Cancer Type Specific
924102	1036	BRAF	p.V600E	THCA	3.09584	Cancer Type Non-Specific
924100	1036	BRAF	p.L597R	PRAD	5.36889	Cancer Type Non-Specific
1299080	1036	BRAF	p.V600E	SKCM	4.59664	Cancer Type Specific
909747	1036	BRAF	p.V600E	COADREAD	3.29974	Cancer Type Non-Specific
1298160	1036	BRAF	p.V600E	SKCM	1.6573	Cancer Type Specific
906844	1036	BRAF	p.V600E	BRCA	-0.828787	Cancer Type Non-Specific
753545	1036	BRAF	p.V600E	SKCM	-1.14527	Cancer Type Specific
909706	1036	BRAF	p.V600E	SKCM	-0.158548	Cancer Type Specific
905974	1036	BRAF	p.V600E	SKCM	1.02757	Cancer Type Specific
909727	1036	BRAF	p.V600E	SKCM	3.7493	Cancer Type Specific
1299081	1036	BRAF	p.V600E	SKCM	2.38315	Cancer Type Specific
906818	1036	BRAF	p.V600E	SKCM	0.12052	Cancer Type Specific
684052	1036	BRAF	p.V600E		3.22339	Cancer Type Non-Specific
1479988	228	KRAS	p.G12D	OV	3.01959	Cancer Type Specific
906801	228	PIK3CA	p.H1047R	BRCA	2.28661	Cancer Type Non-Specific
687995	228	PIK3CA	p.H1047R	SCLC	1.27493	Cancer Type Non-Specific
905936	228	PIK3CA	p.H1047R	COADREAD	2.59299	Cancer Type Specific
1674021	228	PIK3CA	p.H1047R	COADREAD	3.30085	Cancer Type Specific
722045	228	KRAS	p.G12C	LUAD	1.41526	Cancer Type Specific
724866	228	KRAS	p.G13C	LUAD	2.91185	Cancer Type Specific
724868	228	KRAS	p.G12C	LUAD	1.52023	Cancer Type Specific
909778	228	PIK3CA	p.H1047R	BRCA	0.761124	Cancer Type Non-Specific
924106	228	PIK3CA	p.H1047R	BRCA	2.44458	Cancer Type Non-Specific
749709	228	PIK3CA	p.H1047R	BRCA	1.21071	Cancer Type Non-Specific
1660034	228	PIK3CA	p.H1047R	COADREAD	1.4468	Cancer Type Specific
910948	228	PIK3CA	p.H1047R	BRCA	2.33954	Cancer Type Non-Specific
905945	228	PIK3CA	p.H1047R	BRCA	-0.37954	Cancer Type Non-Specific
949168	228	PIK3CA	p.H1047R		2.47843	Cancer Type Non-Specific
905969	228	KRAS	p.G12V	OV	4.30214	Cancer Type Specific
998189	228	PIK3CA	p.H1047R	COADREAD	3.69527	Cancer Type Specific
909698	228	PIK3CA	p.H1047R	COADREAD	2.37769	Cancer Type Specific
724859	228	KRAS	p.Q61K	LUAD	4.5525	Cancer Type Specific
1480362	228	KRAS	p.G12C	OV	2.37967	Cancer Type Specific
1480360	228	KRAS	p.G12D	OV	3.46943	Cancer Type Specific
1240222	228	KRAS	p.G13C	OV	1.91793	Cancer Type Specific
1290730	228	PIK3CA	p.H1047R	BLCA	1.86652	Cancer Type Non-Specific
722046	228	KRAS	p.G12C	LUAD	2.84273	Cancer Type Specific
753562	228	PIK3CA	p.H1047R	HNSC	4.54174	Cancer Type Non-Specific
905959	228	PIK3CA	p.H1047R	OV	0.828333	Cancer Type Non-Specific
908122	228	PIK3CA	p.H1047R	BRCA	-0.198307	Cancer Type Non-Specific
722066	228	KRAS	p.Q61L	LUAD	3.07972	Cancer Type Specific
909753	228	KRAS	p.G12V	OV	2.1543	Cancer Type Specific
905942	228	KRAS	p.G12C	LUAD	3.18612	Cancer Type Specific
1503370	228	KRAS	p.G12A	LUAD	3.33978	Cancer Type Specific
909256	228	PIK3CA	p.H1047R	BRCA	-0.872307	Cancer Type Non-Specific
724874	228	KRAS	p.G12V	LUAD	4.01506	Cancer Type Specific
908472	228	KRAS	p.G12A	LUAD	2.0975	Cancer Type Specific
1240145	228	KRAS	p.G12C	LUAD	1.84858	Cancer Type Specific
906837	228	PIK3CA	p.H1047R	HNSC	2.83714	Cancer Type Non-Specific
724878	228	KRAS	p.G12C	LUAD	4.77125	Cancer Type Specific
724879	228	KRAS	p.G12V	LUSC	3.81017	Cancer Type Specific
722058	228	KRAS	p.G13C	LUAD	2.87023	Cancer Type Specific
724873	228	KRAS	p.G12A	LUAD	5.11479	Cancer Type Specific
908465	228	KRAS	p.G12C	LUAD	1.83672	Cancer Type Specific
908460	228	KRAS	p.G12V	LUAD	4.04561	Cancer Type Specific
753541	228	PIK3CA	p.H1047R	HNSC	1.57915	Cancer Type Non-Specific
905972	228	KRAS	p.G12C	LUAD	2.2212	Cancer Type Specific
1240200	228	PIK3CA	p.H1047R	OV	0.108983	Cancer Type Non-Specific
909721	228	KRAS	p.G12D	LUAD	2.85744	Cancer Type Specific
1479988	223	KRAS	p.G12D	OV	1.08083	Cancer Type Specific
906801	223	PIK3CA	p.H1047R	BRCA	0.587281	Cancer Type Non-Specific
687995	223	PIK3CA	p.H1047R	SCLC	-1.58481	Cancer Type Non-Specific
905936	223	PIK3CA	p.H1047R	COADREAD	1.32517	Cancer Type Specific
1674021	223	PIK3CA	p.H1047R	COADREAD	1.66387	Cancer Type Specific
722045	223	KRAS	p.G12C	LUAD	1.08831	Cancer Type Specific
724866	223	KRAS	p.G13C	LUAD	2.7078	Cancer Type Specific
724868	223	KRAS	p.G12C	LUAD	-0.191148	Cancer Type Specific
909778	223	PIK3CA	p.H1047R	BRCA	0.206986	Cancer Type Non-Specific
924106	223	PIK3CA	p.H1047R	BRCA	1.79716	Cancer Type Non-Specific
749709	223	PIK3CA	p.H1047R	BRCA	-0.484966	Cancer Type Non-Specific
1660034	223	PIK3CA	p.H1047R	COADREAD	0.339938	Cancer Type Specific
910948	223	PIK3CA	p.H1047R	BRCA	2.18046	Cancer Type Non-Specific
905945	223	PIK3CA	p.H1047R	BRCA	-1.6085	Cancer Type Non-Specific
949168	223	PIK3CA	p.H1047R		4.0218	Cancer Type Non-Specific
905969	223	KRAS	p.G12V	OV	1.20417	Cancer Type Specific
998189	223	PIK3CA	p.H1047R	COADREAD	1.77901	Cancer Type Specific
909698	223	PIK3CA	p.H1047R	COADREAD	0.578512	Cancer Type Specific
724859	223	KRAS	p.Q61K	LUAD	3.0364	Cancer Type Specific
1480362	223	KRAS	p.G12C	OV	0.668357	Cancer Type Specific
1480360	223	KRAS	p.G12D	OV	-0.0833081	Cancer Type Specific
1240222	223	KRAS	p.G13C	OV	1.20296	Cancer Type Specific
1290730	223	PIK3CA	p.H1047R	BLCA	0.480545	Cancer Type Non-Specific
722046	223	KRAS	p.G12C	LUAD	2.08098	Cancer Type Specific
753562	223	PIK3CA	p.H1047R	HNSC	1.55771	Cancer Type Non-Specific
905959	223	PIK3CA	p.H1047R	OV	-0.0543716	Cancer Type Non-Specific
908122	223	PIK3CA	p.H1047R	BRCA	-0.802801	Cancer Type Non-Specific
722066	223	KRAS	p.Q61L	LUAD	0.367099	Cancer Type Specific
909753	223	KRAS	p.G12V	OV	-0.806181	Cancer Type Specific
905942	223	KRAS	p.G12C	LUAD	2.29675	Cancer Type Specific
1503370	223	KRAS	p.G12A	LUAD	0.743523	Cancer Type Specific
909256	223	PIK3CA	p.H1047R	BRCA	-0.582515	Cancer Type Non-Specific
724874	223	KRAS	p.G12V	LUAD	4.91559	Cancer Type Specific
908472	223	KRAS	p.G12A	LUAD	1.48724	Cancer Type Specific
1240145	223	KRAS	p.G12C	LUAD	1.44686	Cancer Type Specific
906837	223	PIK3CA	p.H1047R	HNSC	1.84528	Cancer Type Non-Specific
724878	223	KRAS	p.G12C	LUAD	1.68237	Cancer Type Specific
724879	223	KRAS	p.G12V	LUSC	2.12017	Cancer Type Specific
722058	223	KRAS	p.G13C	LUAD	1.26068	Cancer Type Specific
724873	223	KRAS	p.G12A	LUAD	3.49046	Cancer Type Specific
908465	223	KRAS	p.G12C	LUAD	0.248552	Cancer Type Specific
908460	223	KRAS	p.G12V	LUAD	4.67936	Cancer Type Specific
753541	223	PIK3CA	p.H1047R	HNSC	-0.0667801	Cancer Type Non-Specific
905972	223	KRAS	p.G12C	LUAD	1.50454	Cancer Type Specific
1240200	223	PIK3CA	p.H1047R	OV	-1.66801	Cancer Type Non-Specific
909721	223	KRAS	p.G12D	LUAD	1.50462	Cancer Type Specific
907275	1024	KIT	p.N822K	LAML	-3.18552	Cancer Type Non-Specific
910566	1024	JAK2	p.V617F	LAML	-1.58516	Cancer Type Non-Specific
907275	1021	KIT	p.N822K	LAML	-3.92836	Cancer Type Non-Specific
907289	1021	PDGFRA	p.R822H	COADREAD	2.05152	Cancer Type Non-Specific
906801	1166	PIK3CA	p.H1047R	BRCA	-0.937046	Cancer Type Non-Specific
905936	1166	PIK3CA	p.H1047R	COADREAD	-2.1726	Cancer Type Specific
1674021	1166	PIK3CA	p.H1047R	COADREAD	-1.10696	Cancer Type Specific
909778	1166	PIK3CA	p.H1047R	BRCA	-2.19507	Cancer Type Non-Specific
749709	1166	PIK3CA	p.H1047R	BRCA	-2.99589	Cancer Type Non-Specific
1660034	1166	PIK3CA	p.H1047R	COADREAD	-0.397371	Cancer Type Specific
910948	1166	PIK3CA	p.H1047R	BRCA	-1.31305	Cancer Type Non-Specific
949168	1166	PIK3CA	p.H1047R		-2.36523	Cancer Type Non-Specific
998189	1166	PIK3CA	p.H1047R	COADREAD	0.396297	Cancer Type Specific
909698	1166	PIK3CA	p.H1047R	COADREAD	-2.07729	Cancer Type Specific
753562	1166	PIK3CA	p.H1047R	HNSC	-2.25939	Cancer Type Non-Specific
909256	1166	PIK3CA	p.H1047R	BRCA	-3.51336	Cancer Type Non-Specific
753541	1166	PIK3CA	p.H1047R	HNSC	-2.77669	Cancer Type Non-Specific
906793	159	BRAF	p.V600E	SKCM	-0.180117	Cancer Type Specific
906792	159	BRAF	p.V600E	SKCM	0.111375	Cancer Type Specific
906795	159	BRAF	p.V600E	THCA	-0.92357	Cancer Type Non-Specific
1240153	159	BRAF	p.V600E	SKCM	0.563164	Cancer Type Specific
1240154	159	BRAF	p.V600E	THCA	-0.699741	Cancer Type Non-Specific
905939	159	BRAF	p.V600E	COADREAD	0.793051	Cancer Type Non-Specific
1240128	159	BRAF	p.V600E		1.89404	Cancer Type Non-Specific
1240125	159	BRAF	p.V600E	SKCM	3.21495	Cancer Type Specific
1299078	159	BRAF	p.V600E	SKCM	0.110198	Cancer Type Specific
909724	159	BRAF	p.V600E	SKCM	0.819613	Cancer Type Specific
906830	159	BRAF	p.V600E	SKCM	3.89492	Cancer Type Specific
924104	159	BRAF	p.V600E	THCA	-1.12617	Cancer Type Non-Specific
906835	159	BRAF	p.V600E	GBM	-0.377847	Cancer Type Non-Specific
1240130	159	BRAF	p.V600E	SKCM	-0.336294	Cancer Type Specific
905961	159	BRAF	p.V600E	COADREAD	-0.782928	Cancer Type Non-Specific
909698	159	BRAF	p.V600E	COADREAD	0.860543	Cancer Type Non-Specific
907172	159	BRAF	p.V600E	SKCM	0.501379	Cancer Type Specific
753596	159	BRAF	p.V600E	SKCM	0.59081	Cancer Type Specific
1298144	159	BRAF	p.V600E	SKCM	1.01885	Cancer Type Specific
907067	159	BRAF	p.V600E	SKCM	-1.10803	Cancer Type Specific
906865	159	BRAF	p.V600E	SKCM	-0.178318	Cancer Type Specific
907169	159	BRAF	p.V600E	SKCM	-0.226483	Cancer Type Specific
908449	159	BRAF	p.V600E	LGG	0.275853	Cancer Type Non-Specific
910933	159	BRAF	p.V600E	GBM	1.03355	Cancer Type Non-Specific
1287706	159	BRAF	p.V600E	SKCM	-0.692273	Cancer Type Specific
1240226	159	BRAF	p.V600E	SKCM	-2.17125	Cancer Type Specific
909713	159	BRAF	p.V600E	SKCM	-0.155196	Cancer Type Specific
1240173	159	BRAF	p.V600E	COADREAD	2.93399	Cancer Type Non-Specific
907794	159	BRAF	p.V600E	COADREAD	0.53228	Cancer Type Non-Specific
905954	159	BRAF	p.V600E	SKCM	2.89423	Cancer Type Specific
909725	159	BRAF	p.V600E	SKCM	-0.850694	Cancer Type Specific
1299081	159	BRAF	p.V600E	SKCM	-1.08163	Cancer Type Specific
924238	159	BRAF	p.V600E	THCA	0.373758	Cancer Type Non-Specific
909759	159	BRAF	p.V600E		-0.920044	Cancer Type Non-Specific
909756	159	BRAF	p.V600E		-0.622056	Cancer Type Non-Specific
905976	159	BRAF	p.V600E	SKCM	0.106017	Cancer Type Specific
905977	159	BRAF	p.V600E	SKCM	1.5021	Cancer Type Specific
687448	159	BRAF	p.V600E	SKCM	-1.4325	Cancer Type Specific
910921	159	BRAF	p.V600E	SKCM	-0.866622	Cancer Type Specific
909784	159	BRAF	p.V600E	SKCM	2.31364	Cancer Type Specific
906696	159	BRAF	p.V600E	THCA	2.02956	Cancer Type Non-Specific
909719	159	BRAF	p.V600E	LIHC	-1.06089	Cancer Type Non-Specific
924151	159	BRAF	p.V600E	THCA	-0.403359	Cancer Type Non-Specific
925339	159	BRAF	p.V600E	SKCM	0.327922	Cancer Type Specific
906813	159	BRAF	p.V600E	SKCM	3.90805	Cancer Type Specific
906818	159	BRAF	p.V600E	SKCM	-0.288283	Cancer Type Specific
924102	159	BRAF	p.V600E	THCA	0.608324	Cancer Type Non-Specific
924100	159	BRAF	p.L597R	PRAD	1.86405	Cancer Type Non-Specific
909715	159	BRAF	p.V600E	LAML	-0.107073	Cancer Type Non-Specific
910903	159	BRAF	p.V600E	SKCM	0.968451	Cancer Type Specific
1299080	159	BRAF	p.V600E	SKCM	-0.300534	Cancer Type Specific
930301	159	BRAF	p.V600E	SKCM	2.35409	Cancer Type Specific
909747	159	BRAF	p.V600E	COADREAD	1.40708	Cancer Type Non-Specific
906844	159	BRAF	p.V600E	BRCA	0.314659	Cancer Type Non-Specific
906999	159	BRAF	p.V600E		-0.865108	Cancer Type Non-Specific
909723	159	BRAF	p.V600E	SKCM	2.47208	Cancer Type Specific
753545	159	BRAF	p.V600E	SKCM	3.2868	Cancer Type Specific
909706	159	BRAF	p.V600E	SKCM	0.821201	Cancer Type Specific
905974	159	BRAF	p.V600E	SKCM	0.130778	Cancer Type Specific
905975	159	BRAF	p.V600E	SKCM	1.37931	Cancer Type Specific
1298160	159	BRAF	p.V600E	SKCM	0.766543	Cancer Type Specific
684052	159	BRAF	p.V600E		0.733068	Cancer Type Non-Specific
910948	83	PIK3CA	p.H1047R	BRCA	2.81833	Cancer Type Non-Specific
949168	83	PIK3CA	p.H1047R		-0.0772172	Cancer Type Non-Specific
909698	83	PIK3CA	p.H1047R	COADREAD	-4.18965	Cancer Type Specific
909256	83	PIK3CA	p.H1047R	BRCA	-4.89071	Cancer Type Non-Specific
924106	83	PIK3CA	p.H1047R	BRCA	-2.10056	Cancer Type Non-Specific
1479988	1053	KRAS	p.G12D	OV	0.531041	Cancer Type Specific
906801	1053	PIK3CA	p.H1047R	BRCA	1.50725	Cancer Type Non-Specific
687995	1053	PIK3CA	p.H1047R	SCLC	0.723657	Cancer Type Non-Specific
905936	1053	PIK3CA	p.H1047R	COADREAD	2.09521	Cancer Type Specific
1674021	1053	PIK3CA	p.H1047R	COADREAD	0.897932	Cancer Type Specific
724866	1053	KRAS	p.G13C	LUAD	1.47347	Cancer Type Specific
905945	1053	PIK3CA	p.H1047R	BRCA	-1.18987	Cancer Type Non-Specific
749709	1053	PIK3CA	p.H1047R	BRCA	2.08622	Cancer Type Non-Specific
1660034	1053	PIK3CA	p.H1047R	COADREAD	0.981561	Cancer Type Specific
910948	1053	PIK3CA	p.H1047R	BRCA	-0.318664	Cancer Type Non-Specific
949168	1053	PIK3CA	p.H1047R		3.76132	Cancer Type Non-Specific
905969	1053	KRAS	p.G12V	OV	1.17216	Cancer Type Specific
998189	1053	PIK3CA	p.H1047R	COADREAD	1.98433	Cancer Type Specific
909698	1053	PIK3CA	p.H1047R	COADREAD	0.240411	Cancer Type Specific
724859	1053	KRAS	p.Q61K	LUAD	3.13356	Cancer Type Specific
1480362	1053	KRAS	p.G12C	OV	2.06079	Cancer Type Specific
1480360	1053	KRAS	p.G12D	OV	1.48052	Cancer Type Specific
1240222	1053	KRAS	p.G13C	OV	2.28468	Cancer Type Specific
1290730	1053	PIK3CA	p.H1047R	BLCA	0.228273	Cancer Type Non-Specific
724868	1053	KRAS	p.G12C	LUAD	2.97937	Cancer Type Specific
753562	1053	PIK3CA	p.H1047R	HNSC	2.53664	Cancer Type Non-Specific
905959	1053	PIK3CA	p.H1047R	OV	0.592637	Cancer Type Non-Specific
908122	1053	PIK3CA	p.H1047R	BRCA	1.40648	Cancer Type Non-Specific
722066	1053	KRAS	p.Q61L	LUAD	4.1991	Cancer Type Specific
909753	1053	KRAS	p.G12V	OV	3.07464	Cancer Type Specific
905942	1053	KRAS	p.G12C	LUAD	1.97754	Cancer Type Specific
1503370	1053	KRAS	p.G12A	LUAD	0.202161	Cancer Type Specific
909256	1053	PIK3CA	p.H1047R	BRCA	-0.239302	Cancer Type Non-Specific
1240145	1053	KRAS	p.G12C	LUAD	-0.724686	Cancer Type Specific
905949	1053	KRAS	p.G12S	LUAD	0.420428	Cancer Type Specific
906837	1053	PIK3CA	p.H1047R	HNSC	2.18767	Cancer Type Non-Specific
724874	1053	KRAS	p.G12V	LUAD	2.15352	Cancer Type Specific
724878	1053	KRAS	p.G12C	LUAD	2.54264	Cancer Type Specific
724873	1053	KRAS	p.G12A	LUAD	0.480879	Cancer Type Specific
753541	1053	PIK3CA	p.H1047R	HNSC	-0.143503	Cancer Type Non-Specific
905972	1053	KRAS	p.G12C	LUAD	2.03856	Cancer Type Specific
1240200	1053	PIK3CA	p.H1047R	OV	1.75941	Cancer Type Non-Specific
909721	1053	KRAS	p.G12D	LUAD	2.48255	Cancer Type Specific
1479988	1057	KRAS	p.G12D	OV	-4.61195	Cancer Type Specific
906801	1057	PIK3CA	p.H1047R	BRCA	-2.22733	Cancer Type Non-Specific
687995	1057	PIK3CA	p.H1047R	SCLC	-2.52166	Cancer Type Non-Specific
905936	1057	PIK3CA	p.H1047R	COADREAD	-1.99197	Cancer Type Specific
1674021	1057	PIK3CA	p.H1047R	COADREAD	-1.36499	Cancer Type Specific
722045	1057	KRAS	p.G12C	LUAD	-3.61516	Cancer Type Specific
724866	1057	KRAS	p.G13C	LUAD	-3.07706	Cancer Type Specific
909778	1057	PIK3CA	p.H1047R	BRCA	-0.863845	Cancer Type Non-Specific
905945	1057	PIK3CA	p.H1047R	BRCA	-2.59201	Cancer Type Non-Specific
749709	1057	PIK3CA	p.H1047R	BRCA	-0.892631	Cancer Type Non-Specific
1660034	1057	PIK3CA	p.H1047R	COADREAD	-2.24138	Cancer Type Specific
910948	1057	PIK3CA	p.H1047R	BRCA	-2.22398	Cancer Type Non-Specific
949168	1057	PIK3CA	p.H1047R		-1.60414	Cancer Type Non-Specific
905969	1057	KRAS	p.G12V	OV	-3.2661	Cancer Type Specific
998189	1057	PIK3CA	p.H1047R	COADREAD	-2.65248	Cancer Type Specific
909698	1057	PIK3CA	p.H1047R	COADREAD	-3.29007	Cancer Type Specific
724859	1057	KRAS	p.Q61K	LUAD	0.499041	Cancer Type Specific
1480362	1057	KRAS	p.G12C	OV	-3.6705	Cancer Type Specific
1480360	1057	KRAS	p.G12D	OV	-2.76879	Cancer Type Specific
1240222	1057	KRAS	p.G13C	OV	-5.53828	Cancer Type Specific
1290730	1057	PIK3CA	p.H1047R	BLCA	-4.10586	Cancer Type Non-Specific
724868	1057	KRAS	p.G12C	LUAD	-2.74337	Cancer Type Specific
753562	1057	PIK3CA	p.H1047R	HNSC	-2.49369	Cancer Type Non-Specific
905959	1057	PIK3CA	p.H1047R	OV	-2.24545	Cancer Type Non-Specific
908122	1057	PIK3CA	p.H1047R	BRCA	-0.232814	Cancer Type Non-Specific
722066	1057	KRAS	p.Q61L	LUAD	-2.62831	Cancer Type Specific
909753	1057	KRAS	p.G12V	OV	-1.84622	Cancer Type Specific
905942	1057	KRAS	p.G12C	LUAD	-1.88541	Cancer Type Specific
1503370	1057	KRAS	p.G12A	LUAD	-4.899	Cancer Type Specific
909256	1057	PIK3CA	p.H1047R	BRCA	-2.51488	Cancer Type Non-Specific
1240145	1057	KRAS	p.G12C	LUAD	-4.07112	Cancer Type Specific
[truncated: 129 more rows]

## Sheet: 6
Table S6. Mann-Whitney U test of distribution of Ln(IC50) values in cell lines with DEPO sensitive mutations against background distribution for each drug
[truncated: 221 more rows]

[truncated: 13 more sheets: 7, 8, 9, 10, 11, 12, 13, 14, 15, 16, 17, 18, 19]
